# Supplementary material
Source: publisher figshare collection journal article supplement (https://gsajournals.figshare.com/articles/dataset/_/12456206)
Supplement: Supplementary file 1 [file 1]

## Sheet: Septins_analysis
Stringent CDC10 PPIs	Stringent CDC10 GIs	C103_A	C104_A	Ratios	Z-score		Av	std dev		name	name	C103_C	C104_C	Ratios	Z-score		Av	std dev		name	name	C103_A1B	C104_A1B	Ratios	Z-Score		Av	std dev		CDC10 PPIs Stringent >2 reports in SGD and data measured in SCMD		CDC10 GIs Stringent >2 reports in SGD and data measured in SCMD
YJL127C	YJL127C	59.9312	30.1568	1.98732	15.3521		1.21267	0.050459		YJL127C	YJL127C	63.9928	30.0948	2.12637	17.2792		1.21298	0.0528608		YJL127C	YJL127C	63.023	29.6152	2.12806	17.9401		1.20503	0.051451		YJR092W		YKL048C
YCR002C	YCR002C	60.5665	31.4454	1.92608	14.1385			1.31359		YDR264C	YDR264C	62.8944	32.3493	1.94423	13.8334			1.3187		YNL059C	YNL059C	57.3206	29.9646	1.91294	13.759			1.30793		YCR002C		YDR507C
YNL059C	YNL059C	53.8988	28.1921	1.91184	13.8563					YEL044W	YEL044W	59.7256	31.3948	1.9024	13.0422					YDR264C	YDR264C	62.0159	32.7588	1.8931	13.3734					YCL024W		YNL298W
YOL148C	YOL148C	51.4868	27.3226	1.88441	13.3125		For PPIs			YNL059C	YNL059C	56.7453	30.2768	1.87422	12.509		For PPIs			YCR002C	YCR002C	64.9369	35.3999	1.83438	12.2321		For PPIs			YNL166C		YGL066W
YIL040W	YIL040W	54.2105	28.9137	1.8749	13.1242		k	3		YOR141C	YOR141C	55.8776	29.9387	1.8664	12.361		k	3		YEL044W	YEL044W	57.4858	31.4159	1.82983	12.1437		k	3		YDR507C		YKR048C
YKL048C	YKL048C	44.7426	24.0685	1.85897	12.8084		s	112		YCR002C	YCR002C	63.4999	34.2194	1.85567	12.1581		s	113		YOR141C	YOR141C	55.7509	30.5547	1.82463	12.0425		s	119		YMR032W		YDL225W
YEL044W	YEL044W	54.1464	29.4083	1.84119	12.4561		M	7		YOL148C	YOL148C	50.9383	28.6182	1.77992	10.7251		M	7		YKL048C	YKL048C	45.7564	25.2578	1.81157	11.7888		M	7		YDL225W		YNL064C
YDR264C	YDR264C	57.3828	31.6854	1.81101	11.858		N	4718		YKL048C	YKL048C	45.5181	25.6012	1.77797	10.6882		N	4718		YOL148C	YOL148C	51.1856	28.6012	1.78963	11.3623		N	4718				YGR092W
YOR141C	YOR141C	52.0162	29.0599	1.78997	11.4409		expected	0.166		YJL075C	YJL075C	40.1761	23.0886	1.74008	9.97151		expected	0.167		YIL040W	YIL040W	53.3921	30.9924	1.72275	10.0624		expected	0.176				YIL140W
YJL075C	YJL075C	38.4935	22.566	1.70582	9.77325		enrichment	18.05		YIL040W	YIL040W	54.8075	31.5405	1.73768	9.92608		enrichment	17.89x		YJL075C	YJL075C	40.2041	23.4164	1.71692	9.94916		enrichment	16.99x				YIL134W
YMR142C	YMR142C	43.0887	26.0418	1.6546	8.7582		p-value	0.00043		YJL080C	YJL080C	66.031	38.7363	1.70463	9.30081		p-value	0.0004365		YJL080C	YJL080C	64.4025	38.5459	1.6708	9.05274		p-value	0.0005				YPL086C
YJL080C	YJL080C	60.8689	37.3086	1.6315	8.30041					YNL246W	YNL246W	43.4463	26.7876	1.62188	7.7354					YNL246W	YNL246W	43.6012	27.251	1.59998	7.67637							YLR384C
YBL058W	YBL058W	45.2004	27.8861	1.62089	8.09018					YHR011W	YHR011W	43.4221	27.3174	1.58954	7.12354					YHR158C	YHR158C	41.3121	26.3542	1.56757	7.04644							YBR023C
YDL081C	YDL081C	40.8118	25.4912	1.60102	7.6963		For GIs			YNL298W	YNL298W	48.8019	31.0185	1.57331	6.81662		For GIs			YBL058W	YBL058W	48.0691	30.7966	1.56086	6.91588		For GIs					YDR485C
YPR163C	YPR163C	54.6213	34.1278	1.60049	7.68591		k	10		YFL001W	YFL001W	43.8986	28.0043	1.56757	6.70795		k	10		YMR142C	YMR142C	44.6595	28.7012	1.55602	6.82178		k	10				YMR070W
YNL246W	YNL246W	42.115	26.418	1.59418	7.56072		s	112		YDL081C	YDL081C	44.2564	28.3773	1.55957	6.55665		s	113		YHR011W	YHR011W	43.6802	28.1295	1.55283	6.7598		s	119				YLR182W
YHR011W	YHR011W	41.1733	26.1618	1.5738	7.15681		M	72		YGL070C	YGL070C	45.7604	29.5729	1.54738	6.32593		M	72		YDL081C	YDL081C	42.9023	27.6586	1.55114	6.72704		M	72				YDL117W
YHR158C	YHR158C	38.0002	24.2154	1.56926	7.06685		N	4718		YOR369C	YOR369C	49.9913	32.3541	1.54513	6.28341		N	4718		YGL070C	YGL070C	46.6083	30.2386	1.54135	6.53677		N	4718				YNR031C
YGL070C	YGL070C	43.2786	27.8912	1.5517	6.71883		expected	1.709		YBL058W	YBL058W	48.5288	31.4387	1.5436	6.25451		expected	1.724		YFL001W	YFL001W	43.2162	28.4108	1.52111	6.14346		expected	1.81				YHR030C
YGR006W	YGR006W	45.3888	29.8748	1.5193	6.07683		enrichment	5.85x		YHR158C	YHR158C	40.2652	26.1613	1.53911	6.16953		enrichment	5.8x		YOR369C	YOR369C	49.8853	32.8827	1.51707	6.06477		enrichment	5.51x				YMR312W
YLR403W	YLR403W	32.2793	21.2605	1.51828	6.05656		p-value	5.923e-06		YJL140W	YJL140W	56.9967	37.2392	1.53056	6.00775		p-value	6.42e-06		YGR006W	YGR006W	46.5671	30.9417	1.50499	5.83015		p-value	1.02e-05				YHR200W
YOR369C	YOR369C	46.8275	31.0626	1.50752	5.84335					YMR142C	YMR142C	43.8101	28.7592	1.52334	5.87125					YPR163C	YPR163C	55.3582	36.993	1.49645	5.66406							YPL101W
YFL001W	YFL001W	41.7282	27.7415	1.50418	5.77714			PPIs		YKR082W	YKR082W	40.8001	26.8295	1.52072	5.82161					YGL174W	YGL174W	42.4723	28.4814	1.49123	5.56255							YGR200C
YDR049W	YDR049W	39.8206	26.4884	1.50332	5.7601			Gis		YDR049W	YDR049W	43.0334	28.759	1.49634	5.36052					YNL298W	YNL298W	45.9154	30.8257	1.48952	5.52934							YGL136C
YHR010W	YHR010W	36.4022	24.3205	1.49677	5.63028					YNL148C	YNL148C	44.4513	29.7116	1.49609	5.3558					YDR049W	YDR049W	42.5488	28.5751	1.48902	5.51959							YJL099W
YER120W	YER120W	38.8152	26.2579	1.47823	5.26291					YPR163C	YPR163C	56.3629	37.7082	1.49471	5.32966					YJL140W	YJL140W	56.6971	38.209	1.48387	5.41952							YNL032W
YBR081C	YBR081C	38.7172	26.1934	1.47813	5.26087					YER120W	YER120W	40.8622	27.4007	1.49128	5.26474					YNL148C	YNL148C	44.409	29.9698	1.48179	5.37918							YIL135C
YER119C-A	YER119C-A	38.2569	25.949	1.47431	5.18525					YER119C-A	YER119C-A	40.6479	27.3257	1.48753	5.19383					YDR507C	YDR507C	37.7667	25.5037	1.48083	5.36055							YHR111W
YDR507C	YDR507C	34.9724	23.977	1.45858	4.87342					YLR403W	YLR403W	33.4928	22.5977	1.48214	5.09178					YER119C-A	YER119C-A	40.353	27.4642	1.4693	5.13633							YNL072W
YJL140W	YJL140W	53.7182	36.8664	1.45711	4.84424					YDR507C	YDR507C	38.1942	25.9546	1.47158	4.89198					YER120W	YER120W	41.0222	27.9344	1.46852	5.12117							YPL115C
YOR198C	YOR198C	44.7558	30.8656	1.45002	4.70391					YML014W	YML014W	44.8253	30.5795	1.46586	4.7838					YML014W	YML014W	44.8652	30.6839	1.46217	4.99786							YNL166C
YBL025W	YBL025W	41.9791	29.082	1.44347	4.57405					YGR006W	YGR006W	46.7062	32.0605	1.45681	4.61272					YKR082W	YKR082W	39.463	27.1442	1.45383	4.83567							YPL232W
YJL184W	YJL184W	48.2682	33.4515	1.44293	4.56335					YOR127W	YOR127W	38.9859	26.7769	1.45596	4.59646					YOR198C	YOR198C	45.5691	31.7088	1.43711	4.51078							YPR043W
YKR082W	YKR082W	37.9771	26.3452	1.44152	4.53537					YGL174W	YGL174W	41.3386	28.4639	1.45232	4.52765					YDL115C	YDL115C	43.7948	30.4823	1.43673	4.50334							YLR239C
YNL298W	YNL298W	40.6259	28.4645	1.42725	4.25252					YHR010W	YHR010W	38.897	26.8689	1.44766	4.43951					YOR127W	YOR127W	39.1081	27.2268	1.43638	4.49664							YJL101C
YDL115C	YDL115C	41.5057	29.2387	1.41954	4.09984					YGR092W	YGR092W	42.36	29.3605	1.44275	4.34672					YHR010W	YHR010W	38.6319	27.0488	1.42823	4.33817							YNL091W
YNL148C	YNL148C	41.255	29.1368	1.4159	4.02772					YIL141W	YIL141W	40.16	27.8387	1.4426	4.34376					YBR081C	YBR081C	39.8768	27.9807	1.42516	4.27839							YPL159C
YDL191W	YDL191W	35.1896	24.9031	1.41306	3.97132					YJL204C	YJL204C	43.6145	30.3059	1.43914	4.2784					YIL141W	YIL141W	39.2385	27.538	1.42489	4.27317							YOR251C
YJL204C	YJL204C	41.4534	29.3361	1.41305	3.97116					YIR005W	YIR005W	40.709	28.3852	1.43417	4.18424					YJL184W	YJL184W	51.4305	36.1509	1.42266	4.22991							YOL124C
YGL174W	YGL174W	39.0406	27.7631	1.4062	3.83542					YPL129W	YPL129W	44.7073	31.2335	1.43139	4.13176					YLR403W	YLR403W	33.279	23.4162	1.4212	4.20143							YHR142W
YIL141W	YIL141W	36.6043	26.0321	1.40612	3.83389					YOR198C	YOR198C	44.849	31.3599	1.43014	4.10807					YNL206C	YNL206C	42.0873	29.8124	1.41174	4.01766							YLR371W
YOR127W	YOR127W	37.1834	26.4741	1.40452	3.80212					YCR094W	YCR094W	44.0072	30.7943	1.42907	4.08784					YLL049W	YLL049W	48.7737	34.6521	1.40753	3.93576							YDR293C
YNL206C	YNL206C	39.5012	28.1955	1.40098	3.73186					YBL025W	YBL025W	45.3039	31.7425	1.42723	4.05304					YDR532C	YDR532C	42.7362	30.4103	1.40532	3.89285							YDR006C
YBR126C	YBR126C	35.191	25.1839	1.39736	3.66024					YBR279W	YBR279W	49.9153	35.0224	1.42524	4.01542					YJL204C	YJL204C	43.4049	30.9568	1.40211	3.83053							YGL231C
YGL066W	YGL066W	37.1292	26.7037	1.39042	3.52262					YDL115C	YDL115C	43.2761	30.4628	1.42062	3.92802					YBL025W	YBL025W	44.7269	31.9167	1.40136	3.81594							YFL010C
YPR057W	YPR057W	37.5706	27.0362	1.38964	3.50731					YKL101W	YKL101W	42.3009	29.9061	1.41446	3.81141					YCR094W	YCR094W	42.9223	30.6625	1.39983	3.78619							YGL173C
YCR094W	YCR094W	40.9747	29.5051	1.38873	3.48924					YOL115W	YOL115W	53.0404	37.537	1.41302	3.78418					YBR279W	YBR279W	50.2327	35.9096	1.39887	3.76745							YLR330W
YGL253W	YGL253W	33.4037	24.0678	1.3879	3.47274					YLL049W	YLL049W	48.9094	34.6197	1.41276	3.77939					YGR262C	YGR262C	48.992	35.2484	1.38991	3.59331							YPL047W
YML014W	YML014W	41.095	29.6825	1.38449	3.40511					YBR126C	YBR126C	37.7365	26.783	1.40897	3.70768					YPL129W	YPL129W	43.7335	31.4886	1.38887	3.57312							YDR225W
YDR200C	YDR200C	40.8599	29.5286	1.38374	3.39031					YGR262C	YGR262C	50.1682	35.6636	1.4067	3.66475					YPR057W	YPR057W	39.8597	28.717	1.38802	3.5566							YPL226W
YGR262C	YGR262C	47.4669	34.3581	1.38154	3.34662					YPR135W	YPR135W	48.8562	34.745	1.40614	3.654					YGL253W	YGL253W	36.6961	26.5542	1.38193	3.43832							YMR223W
YMR185W	YMR185W	44.2052	32.0731	1.37826	3.28177					YMR179W	YMR179W	41.1151	29.2953	1.40347	3.60357					YIR005W	YIR005W	39.8904	28.8989	1.38034	3.40744							YGL213C
YPL129W	YPL129W	40.5257	29.5355	1.3721	3.1596					YGL253W	YGL253W	36.41	26.2789	1.38552	3.26397					YGR092W	YGR092W	40.6451	29.4457	1.38034	3.4074							YPR045C
YPR135W	YPR135W	43.6538	31.8275	1.37157	3.14919					YMR014W	YMR014W	48.0309	34.6901	1.38457	3.2461					YBR134W	YBR134W	44.2554	32.1753	1.37545	3.31226							YNR007C
YFL023W	YFL023W	36.8793	26.9904	1.36639	3.04636					YJR090C	YJR090C	37.3016	26.9786	1.38264	3.20949					YIL009W	YIL009W	45.0663	32.7763	1.37497	3.30294							YMR273C
YBR279W	YBR279W	46.4979	34.0591	1.36521	3.02308					YIL047C	YIL047C	46.7074	33.8079	1.38155	3.18895					YPR101W	YPR101W	39.3477	28.664	1.37272	3.25925							YPL069C
YHR207C	YHR207C	37.7603	27.7574	1.36037	2.9271					YHR193C	YHR193C	48.4492	35.0725	1.3814	3.1861					YJR055W	YJR055W	49.8286	36.3079	1.37239	3.25284							YPL022W
YLL049W	YLL049W	45.2091	33.2809	1.35841	2.88831					YLR423C	YLR423C	45.9806	33.2896	1.38123	3.1828					YMR185W	YMR185W	46.4465	33.8971	1.37022	3.21067							YDR207C
YIL009W	YIL009W	42.9595	31.6883	1.35569	2.83438					YNL138W	YNL138W	48.0729	34.8426	1.37971	3.15418					YBR126C	YBR126C	37.833	27.6162	1.36996	3.20557							YJR070C
YPR101W	YPR101W	36.4112	26.8601	1.35559	2.83231					YJL184W	YJL184W	51.2556	37.1582	1.37939	3.14803					YMR014W	YMR014W	48.1664	35.1772	1.36925	3.19186							YJR075W
YDL021W	YDL021W	44.7134	32.9963	1.3551	2.82272					YDL191W	YDL191W	37.6862	27.4028	1.37527	3.07008					YKL101W	YKL101W	40.7359	29.7891	1.36747	3.15731							YEL066W
YOL115W	YOL115W	47.6483	35.1646	1.35501	2.82087					YIL009W	YIL009W	45.3753	33.062	1.37243	3.01642					YPR135W	YPR135W	45.5742	33.3444	1.36677	3.14364							YBL007C
YML111W	YML111W	38.0624	28.0979	1.35463	2.81345					YIL011W	YIL011W	49.0531	35.8169	1.36955	2.96192					YML111W	YML111W	39.974	29.2511	1.36658	3.13994							YOR026W
YMR179W	YMR179W	40.072	29.5958	1.35398	2.80045					YGR104C	YGR104C	43.3604	31.6791	1.36874	2.94656					YIL047C	YIL047C	46.93	34.3588	1.36588	3.12632							YOL108C
YHR193C	YHR193C	45.1407	33.3515	1.35348	2.79066					YNL206C	YNL206C	41.3402	30.2282	1.36761	2.92512					YGR104C	YGR104C	43.7434	32.0259	1.36587	3.1262							YER111C
YKR048C	YKR048C	35.1078	25.965	1.35212	2.76367					YOR080W	YOR080W	51.1201	37.4235	1.36599	2.89451					YMR179W	YMR179W	41.2976	30.2363	1.36583	3.12531							YDL006W
YDL225W	YDL225W	38.4957	28.4713	1.35209	2.76296					YML111W	YML111W	39.3945	28.8574	1.36514	2.87847					YHR193C	YHR193C	47.4437	34.7756	1.36428	3.09523							YOR327C
YIL047C	YIL047C	43.1998	32.0194	1.34918	2.70528					YFL023W	YFL023W	39.5146	28.9625	1.36434	2.86327					YHR207C	YHR207C	41.2226	30.2557	1.36247	3.0601							YDR245W
YIR005W	YIR005W	37.5207	27.8101	1.34917	2.70522					YKR048C	YKR048C	36.7246	26.9397	1.36321	2.84203					YMR035W	YMR035W	46.1208	34.0103	1.35608	2.93589							YNL079C
YMR198W	YMR198W	36.143	26.8202	1.3476	2.67415					YDL021W	YDL021W	46.6823	34.2829	1.36168	2.81295					YDR200C	YDR200C	45.3209	33.5025	1.35276	2.8714							YLR319C
YNL064C	YNL064C	36.6127	27.1968	1.34621	2.64656					YMR035W	YMR035W	46.0094	33.7933	1.3615	2.80951					YKR048C	YKR048C	36.7197	27.204	1.34979	2.8136							YLL021W
YGR092W	YGR092W	39.4842	29.3419	1.34566	2.63559					YMR185W	YMR185W	45.7261	33.6168	1.36022	2.78531					YNL064C	YNL064C	39.2463	29.0992	1.34871	2.79255							YNL271C
YJR105W	YJR105W	36.4394	27.1024	1.34451	2.61282					YDL225W	YDL225W	41.8285	30.7568	1.35997	2.78072					YEL006W	YEL006W	35.7973	26.6014	1.34569	2.73395
YGR104C	YGR104C	41.5523	30.9153	1.34407	2.60405					YIL140W	YIL140W	38.8566	28.5927	1.35897	2.76165					YGR180C	YGR180C	47.5591	35.3443	1.34559	2.73204
YBR021W	YBR021W	35.2295	26.2112	1.34407	2.60401					YPR057W	YPR057W	39.9492	29.3989	1.35887	2.75981					YIL011W	YIL011W	48.6994	36.193	1.34554	2.73108
YOR323C	YOR323C	42.6233	31.7741	1.34145	2.5521					YOR258W	YOR258W	47.4922	34.9966	1.35705	2.72546					YPR119W	YPR119W	37.785	28.1032	1.34451	2.71097
YJR055W	YJR055W	45.597	33.9951	1.34128	2.54884					YJL029C	YJL029C	51.9497	38.3484	1.35468	2.68053					YGL066W	YGL066W	38.2318	28.4395	1.34432	2.70733
YMR014W	YMR014W	44.8779	33.4847	1.34025	2.52842					YPR101W	YPR101W	39.7264	29.3297	1.35448	2.67671					YLR021W	YLR021W	51.0024	37.957	1.34369	2.69503
YIL140W	YIL140W	36.0415	26.9148	1.3391	2.50554					YJR055W	YJR055W	48.9206	36.1453	1.35344	2.65721					YDL021W	YDL021W	46.87	34.9474	1.34116	2.6458
YJL029C	YJL029C	48.074	35.9768	1.33625	2.44915					YHR064C	YHR064C	35.5853	26.2989	1.35311	2.65088					YLL044W	YLL044W	45.6051	34.0159	1.3407	2.63688
YDR138W	YDR138W	51.0087	38.2191	1.33464	2.41719					YIL134W	YIL134W	49.083	36.4599	1.34622	2.52054					YJR105W	YJR105W	38.7414	28.898	1.34062	2.63545
YMR091C	YMR091C	43.7878	32.8343	1.3336	2.3966					YNL068C	YNL068C	38.1097	28.3188	1.34574	2.51148					YMR091C	YMR091C	48.0698	35.8588	1.34053	2.63363
YMR035W	YMR035W	42.5137	31.889	1.33318	2.38823					YOR323C	YOR323C	47.864	35.5712	1.34558	2.50847					YER070W	YER070W	43.6158	32.5614	1.33949	2.61343
YNL138W	YNL138W	44.4719	33.3747	1.3325	2.3749					YGL066W	YGL066W	37.5981	27.9544	1.34498	2.49708					YNL138W	YNL138W	47.7552	35.6657	1.33897	2.60328
YMR116C	YMR116C	43.7865	32.8781	1.33178	2.36061					YDL073W	YDL073W	48.282	35.9033	1.34478	2.49329					YFL023W	YFL023W	38.9438	29.0905	1.33871	2.59823
YDR364C	YDR364C	40.7843	30.6365	1.33123	2.3497					YDR138W	YDR138W	50.9603	37.9004	1.34458	2.48959					YOR258W	YOR258W	47.7901	35.7013	1.33861	2.59629
YHL033C	YHL033C	32.7058	24.6219	1.32832	2.292					YJR105W	YJR105W	39.3822	29.3157	1.34338	2.46683					YLR423C	YLR423C	45.6007	34.1122	1.33679	2.56083
YOR258W	YOR258W	45.6484	34.3692	1.32818	2.28912					YDL020C	YDL020C	37.1237	27.6419	1.34302	2.46002					YOR323C	YOR323C	46.31	34.6438	1.33675	2.56015
YGL033W	YGL033W	42.0343	31.6948	1.32622	2.25037					YDL042C	YDL042C	40.6433	30.2649	1.34292	2.4581					YIL140W	YIL140W	38.8585	29.075	1.33649	2.55516
YIL011W	YIL011W	44.2214	33.3472	1.32609	2.24779					YLL044W	YLL044W	45.3274	33.7729	1.34212	2.443					YJL175W	YJL175W	38.6503	28.9446	1.33532	2.53242
YNL323W	YNL323W	36.2967	27.3784	1.32574	2.24083					YPR119W	YPR119W	38.3468	28.624	1.33967	2.39662					YDR138W	YDR138W	50.2628	37.668	1.33437	2.5138
YJL023C	YJL023C	43.2106	32.6003	1.32547	2.23541					YAL047C	YAL047C	47.9845	35.8293	1.33926	2.38878					YDL020C	YDL020C	37.3953	28.0373	1.33377	2.50218
YCR033W	YCR033W	34.1273	25.7714	1.32423	2.21092					YJR063W	YJR063W	47.2567	35.394	1.33516	2.31131					YIL134W	YIL134W	48.0732	36.09	1.33204	2.46858
YKL101W	YKL101W	38.8026	29.3161	1.32359	2.19826					YBR081C	YBR081C	37.6019	28.1792	1.33438	2.29661					YHR064C	YHR064C	35.8582	26.9266	1.3317	2.46206
YNL107W	YNL107W	39.7788	30.0685	1.32294	2.18528					YHR207C	YHR207C	40.6285	30.4728	1.33327	2.27558					YOL115W	YOL115W	50.2405	37.7396	1.33124	2.45312
YPR119W	YPR119W	35.1631	26.6105	1.3214	2.15484					YPR018W	YPR018W	39.8615	29.913	1.33258	2.26255					YDL225W	YDL225W	40.7338	30.6346	1.32967	2.42247
YLR423C	YLR423C	42.7754	32.373	1.32133	2.15348					YBR085W	YBR085W	49.6337	37.2504	1.33243	2.25972					YMR198W	YMR198W	40.4151	30.3959	1.32963	2.4217
YNL068C	YNL068C	36.3523	27.5144	1.32121	2.15103					YMR116C	YMR116C	46.5331	34.9505	1.3314	2.24021					YDL073W	YDL073W	48.4626	36.4532	1.32945	2.41819
YMR031W-A	YMR031W-A	37.1678	28.1729	1.31928	2.11275					YMR091C	YMR091C	48.7375	36.6133	1.33114	2.23529					YOR080W	YOR080W	50.2579	37.8604	1.32745	2.37948
YAL011W	YAL011W	33.5513	25.4318	1.31927	2.11253					YMR198W	YMR198W	40.2704	30.3032	1.32892	2.19324					YBR021W	YBR021W	37.8101	28.4847	1.32738	2.37811
YGL054C	YGL054C	35.9756	27.274	1.31904	2.10813					YDR241W	YDR241W	38.359	28.8827	1.3281	2.17767					YAL047C	YAL047C	48.0905	36.2546	1.32647	2.36027
YLL044W	YLL044W	42.0804	31.9131	1.31859	2.09917					YDR462W	YDR462W	45.0482	33.9505	1.32688	2.15462					YDL042C	YDL042C	40.1771	30.2986	1.32604	2.35195
YIL110W	YIL110W	33.8675	25.6968	1.31797	2.08676					YEL006W	YEL006W	34.934	26.3721	1.32466	2.1127					YJL023C	YJL023C	47.0543	35.4873	1.32595	2.35022
YMR125W	YMR125W	35.2828	26.7714	1.31793	2.08608					YJL023C	YJL023C	46.3005	34.9791	1.32366	2.09377					YDL191W	YDL191W	36.5055	27.5936	1.32297	2.29232
YIL134W	YIL134W	44.1438	33.5022	1.31764	2.08034					YLR085C	YLR085C	35.9025	27.1243	1.32363	2.0931					YNR004W	YNR004W	38.1549	28.8687	1.32167	2.26711
YPL256C	YPL256C	34.725	26.3811	1.31629	2.05347					YPL256C	YPL256C	37.6465	28.4586	1.32285	2.07846					YDL160C	YDL160C	43.533	32.9388	1.32163	2.26633
YGR180C	YGR180C	43.3302	32.9363	1.31558	2.03944					YDR200C	YDR200C	45.0543	34.0788	1.32206	2.06352					YJR090C	YJR090C	37.0893	28.0912	1.32032	2.24076
YLR113W	YLR113W	35.2118	26.769	1.31539	2.03577					YGR180C	YGR180C	46.4753	35.1598	1.32183	2.05919					YNL068C	YNL068C	38.1226	28.8804	1.32002	2.2349
YIR009W	YIR009W	34.2531	26.0484	1.31498	2.02758					YNL319W	YNL319W	36.4909	27.6248	1.32095	2.04245					YJR063W	YJR063W	47.4001	35.9321	1.31916	2.21822
YEL006W	YEL006W	33.7091	25.6419	1.31461	2.02024					YNL107W	YNL107W	40.851	30.9434	1.32018	2.02801					YNL107W	YNL107W	43.0041	32.6095	1.31876	2.21047
YNL233W	YNL233W	34.7262	26.4237	1.31421	2.01234					YLL030C	YLL030C	47.4528	35.9546	1.3198	2.02065					YDR241W	YDR241W	38.5971	29.2686	1.31872	2.20976
YHR064C	YHR064C	34.0205	25.8948	1.31379	2.00408					YBR134W	YBR134W	42.9004	32.5207	1.31917	2.00889					YPR018W	YPR018W	39.9144	30.3541	1.31496	2.13659
YNL215W	YNL215W	36.5347	27.8251	1.31301	1.98862					YML102C-A	YML102C-A	43.2677	32.7992	1.31917	2.00884					YIR009W	YIR009W	36.8569	28.056	1.31369	2.11194
YDL160C	YDL160C	42.6785	32.5123	1.31269	1.98214					YBR021W	YBR021W	38.1986	28.9961	1.31737	1.97479					YMR078C	YMR078C	40.8673	31.13	1.31279	2.09454
YDR448W	YDR448W	33.4512	25.5315	1.31019	1.93276					YGL149W	YGL149W	37.3161	28.3895	1.31443	1.91923					YJL029C	YJL029C	50.5628	38.576	1.31073	2.05443
YNL319W	YNL319W	33.3883	25.501	1.30929	1.91487					YNL215W	YNL215W	38.3338	29.1773	1.31382	1.90767					YLL030C	YLL030C	47.9862	36.6123	1.31066	2.05304
YOR295W	YOR295W	33.4128	25.5312	1.30871	1.90324					YBL016W	YBL016W	40.069	30.4995	1.31376	1.90642					YNL319W	YNL319W	36.8539	28.1252	1.31035	2.04705
YDR241W	YDR241W	36.8188	28.1505	1.30793	1.8878					YBL079W	YBL079W	39.1543	29.8035	1.31375	1.90625					YDL047W	YDL047W	36.9353	28.1993	1.30979	2.03625
YJR090C	YJR090C	35.5703	27.1966	1.3079	1.88719					YGL226C-A	YGL226C-A	44.461	33.8882	1.31199	1.87303					YIL015W	YIL015W	40.9406	31.2795	1.30886	2.01809
YDL020C	YDL020C	35.2895	26.9825	1.30786	1.88655					YCR033W	YCR033W	38.2749	29.1741	1.31195	1.87217					YBR085W	YBR085W	48.5503	37.1267	1.30769	1.99536
YBL094C	YBL094C	45.6897	34.9415	1.3076	1.88141					YIL097W	YIL097W	38.009	28.9801	1.31155	1.86473					YNL065W	YNL065W	43.7835	33.5172	1.3063	1.96831
YPL086C	YPL086C	34.9105	26.7084	1.3071	1.87139					YMR032W	YMR032W	48.353	36.869	1.31148	1.86337					YMR031W-A	YMR031W-A	41.1163	31.4852	1.30589	1.96045
YDL042C	YDL042C	37.9391	29.0549	1.30577	1.84512					YHL033C	YHL033C	35.3286	26.9392	1.31142	1.86222					YGR108W	YGR108W	36.0241	27.6086	1.30481	1.93943
YBL079W	YBL079W	36.7064	28.1276	1.305	1.82972					YBL106C	YBL106C	37.2634	28.426	1.31089	1.85224					YNL171C	YNL171C	41.0284	31.445	1.30477	1.93853
YDL073W	YDL073W	44.2488	33.9166	1.30463	1.82256					YLR021W	YLR021W	48.7553	37.2062	1.31041	1.84306					YMR125W	YMR125W	37.7281	28.9231	1.30443	1.93197
YGR108W	YGR108W	33.7374	25.8622	1.30451	1.8201					YNL171C	YNL171C	41.7943	31.8962	1.31032	1.8414					YIL121W	YIL121W	50.3044	38.5815	1.30385	1.92066
YPR018W	YPR018W	38.2301	29.3223	1.30379	1.80585					YJL175W	YJL175W	37.6072	28.7011	1.31031	1.84113					YAR029W	YAR029W	34.9389	26.8118	1.30312	1.90651
YER070W	YER070W	39.7877	30.5449	1.3026	1.78221					YIL121W	YIL121W	49.7057	37.9488	1.30981	1.8317					YDR462W	YDR462W	43.3097	33.3431	1.29891	1.82464
YJL175W	YJL175W	34.7627	26.6879	1.30256	1.78147					YMR125W	YMR125W	37.1836	28.3949	1.30951	1.82615					YBL079W	YBL079W	39.0433	30.0652	1.29862	1.8191
YDR159W	YDR159W	36.6118	28.1194	1.30201	1.77061					YJL115W	YJL115W	40.8464	31.2051	1.30897	1.81578					YIL110W	YIL110W	35.6635	27.477	1.29794	1.80586
YER110C	YER110C	40.1404	30.8365	1.30172	1.76476					YIL110W	YIL110W	35.0031	26.7456	1.30874	1.81152					YDR159W	YDR159W	42.4622	32.7159	1.29791	1.80522
YML041C	YML041C	34.8807	26.7987	1.30158	1.7621					YHL029C	YHL029C	33.9879	25.9762	1.30843	1.80559					YCR033W	YCR033W	38.4718	29.6436	1.29781	1.80335
YGL226C-A	YGL226C-A	41.7079	32.0486	1.30139	1.75832					YLR452C	YLR452C	41.4551	31.735	1.30629	1.76509					YBL032W	YBL032W	39.2325	30.2721	1.296	1.76806
YDR300C	YDR300C	42.5384	32.6895	1.30129	1.75622					YGR108W	YGR108W	36.1272	27.6914	1.30464	1.73388					YGL149W	YGL149W	37.5202	28.9702	1.29513	1.75121
YBR085W	YBR085W	45.5969	35.0433	1.30116	1.75366					YER070W	YER070W	39.5638	30.3265	1.3046	1.73313					YOR027W	YOR027W	37.6717	29.1024	1.29445	1.73808
YBL061C	YBL061C	32.1602	24.7207	1.30094	1.7494					YDL160C	YDL160C	43.5483	33.3824	1.30453	1.73183					YKR029C	YKR029C	37.9797	29.3449	1.29425	1.73414
YLL030C	YLL030C	43.1777	33.2096	1.30016	1.73383					YBL032W	YBL032W	39.4164	30.2216	1.30424	1.72645					YNL233W	YNL233W	36.8004	28.4469	1.29365	1.72253
YKL121W	YKL121W	36.6297	28.1865	1.29955	1.7218					YAL020C	YAL020C	36.8389	28.2468	1.30418	1.72524					YIL035C	YIL035C	35.5171	27.4583	1.2935	1.71947
YNL248C	YNL248C	38.9383	29.969	1.29929	1.71657					YEL059W	YEL059W	37.0432	28.4251	1.30318	1.7064					YOR359W	YOR359W	37.9153	29.3142	1.29341	1.71782
YIL097W	YIL097W	35.4457	27.2865	1.29902	1.71131					YDR227W	YDR227W	38.6758	29.6797	1.30311	1.70492					YBR195C	YBR195C	40.3591	31.208	1.29323	1.71432
YIL159W	YIL159W	35.6473	27.4459	1.29882	1.70736					YAL011W	YAL011W	36.5184	28.0255	1.30304	1.70372					YLR322W	YLR322W	47.4749	36.7428	1.29209	1.69213
YAR029W	YAR029W	32.8008	25.2618	1.29843	1.69969					YIL053W	YIL053W	40.199	30.8503	1.30303	1.70353					YMR032W	YMR032W	47.5647	36.8438	1.29098	1.67062
YJR077C	YJR077C	36.706	28.2833	1.2978	1.68711					YMR067C	YMR067C	39.4943	30.3144	1.30282	1.69955					YMR116C	YMR116C	44.7734	34.6845	1.29088	1.66855
YLR085C	YLR085C	32.7195	25.2256	1.29708	1.67275					YLR322W	YLR322W	49.5441	38.0294	1.30279	1.69886					YDR227W	YDR227W	37.9564	29.406	1.29077	1.66651
YBR173C	YBR173C	36.5767	28.2249	1.2959	1.64947					YMR078C	YMR078C	40.6587	31.2431	1.30137	1.67201					YGL054C	YGL054C	38.356	29.7252	1.29036	1.65842
YLL020C	YLL020C	39.1729	30.2403	1.29539	1.63936					YDR532C	YDR532C	41.3929	31.8165	1.30099	1.66485					YNL215W	YNL215W	37.6787	29.2029	1.29024	1.6562
YLR384C	YLR384C	34.2221	26.4186	1.29538	1.63912					YLR384C	YLR384C	37.3734	28.7434	1.30024	1.6507					YLR436C	YLR436C	35.7284	27.6942	1.2901	1.65352
YNL171C	YNL171C	37.6786	29.1022	1.2947	1.62564					YNL248C	YNL248C	40.1194	30.8753	1.2994	1.63488					YLR452C	YLR452C	40.7935	31.6203	1.2901	1.65352
YOR080W	YOR080W	45.375	35.0555	1.29438	1.61925					YGL054C	YGL054C	38.8078	29.875	1.299	1.62732					YJL115W	YJL115W	41.6969	32.3282	1.2898	1.64763
YBR231C	YBR231C	36.4719	28.1906	1.29376	1.60711					YJL168C	YJL168C	37.6656	29.0004	1.29879	1.62333					YGL226C-A	YGL226C-A	44.5599	34.5742	1.28882	1.62859
YKR029C	YKR029C	34.6567	26.7927	1.29351	1.60218					YHR087W	YHR087W	38.1634	29.3935	1.29836	1.61522					YDR300C	YDR300C	44.8538	34.8026	1.28881	1.6283
YBR134W	YBR134W	41.0105	31.7309	1.29244	1.58099					YJR077C	YJR077C	39.3693	30.3252	1.29824	1.61287					YEL059W	YEL059W	37.2347	28.9061	1.28812	1.61502
YOR359W	YOR359W	36.4938	28.241	1.29223	1.57672					YIR009W	YIR009W	36.5745	28.1782	1.29797	1.60779					YDR173C	YDR173C	40.8966	31.7617	1.28761	1.60504
YLR021W	YLR021W	47.492	36.7723	1.29152	1.56257					YNL233W	YNL233W	38.6249	29.7585	1.29795	1.60729					YHL029C	YHL029C	34.5917	26.8667	1.28753	1.60351
YIL053W	YIL053W	37.299	28.8902	1.29106	1.55357					YPL049C	YPL049C	37.1683	28.6455	1.29753	1.59936					YPL256C	YPL256C	37.5408	29.1616	1.28734	1.59975
YIL035C	YIL035C	33.5095	25.9635	1.29064	1.5452					YHR080C	YHR080C	38.3696	29.579	1.29719	1.593					YPL158C	YPL158C	37.8607	29.4103	1.28733	1.59956
YBL032W	YBL032W	38.0909	29.5194	1.29037	1.53985					YDR117C	YDR117C	42.1858	32.5371	1.29654	1.58079					YIL159W	YIL159W	38.1886	29.6669	1.28725	1.59798
YOR189W	YOR189W	34.4006	26.6666	1.29003	1.53311					YAR029W	YAR029W	34.5676	26.6644	1.29639	1.57793					YDL041W	YDL041W	39.8777	30.9896	1.28681	1.58952
YMR186W	YMR186W	35.8929	27.8246	1.28997	1.53195					YHR030C	YHR030C	37.6338	29.0301	1.29637	1.57752					YDL133W	YDL133W	42.7532	33.2293	1.28661	1.58566
YMR078C	YMR078C	38.9879	30.2287	1.28976	1.52787					YDL133W	YDL133W	41.7663	32.2452	1.29527	1.55669					YDL116W	YDL116W	40.8355	31.7406	1.28654	1.58429
YOR027W	YOR027W	35.1795	27.2908	1.28906	1.51399					YLL020C	YLL020C	41.3973	31.9657	1.29505	1.55261					YLR113W	YLR113W	37.9122	29.5	1.28516	1.55748
YHR080C	YHR080C	35.4155	27.4739	1.28906	1.51391					YER110C	YER110C	43.0316	33.2283	1.29503	1.55209					YOR189W	YOR189W	37.3364	29.0563	1.28497	1.55375
YIL079C	YIL079C	33.9788	26.3615	1.28895	1.51179					YDR300C	YDR300C	45.4692	35.1391	1.29398	1.53221					YGL173C	YGL173C	45.9187	35.7527	1.28434	1.54151
YOL067C	YOL067C	33.9159	26.3149	1.28885	1.5097					YFL016C	YFL016C	38.279	29.5857	1.29384	1.52957					YNL323W	YNL323W	37.9294	29.5383	1.28408	1.53641
YDL041W	YDL041W	38.2105	29.6475	1.28883	1.5093					YNR004W	YNR004W	37.4761	29.0001	1.29228	1.50006					YOL070C	YOL070C	37.2311	29.01	1.28339	1.52299
YIL050W	YIL050W	32.8782	25.5121	1.28873	1.5074					YDL041W	YDL041W	39.9697	30.9356	1.29203	1.4954					YAL011W	YAL011W	36.8102	28.6931	1.28289	1.51338
YKL032C	YKL032C	36.719	28.5002	1.28838	1.50036					YKL113C	YKL113C	46.2044	35.7628	1.29197	1.49419					YGL033W	YGL033W	44.9705	35.0769	1.28205	1.49707
YHL005C	YHL005C	31.0257	24.0918	1.28781	1.4891					YIL107C	YIL107C	38.0337	29.4391	1.29195	1.49381					YLR384C	YLR384C	37.0902	28.936	1.2818	1.49211
YDR174W	YDR174W	35.9142	27.8926	1.28759	1.48473					YIL007C	YIL007C	36.3907	28.1779	1.29146	1.48461					YJR092W	YJR092W	36.6822	28.6202	1.28169	1.48998
YBL106C	YBL106C	33.1441	25.7426	1.28752	1.4834					YIL015W	YIL015W	39.7011	30.7429	1.29139	1.48324					YIL116W	YIL116W	38.4028	29.9651	1.28159	1.48797
YBR023C	YBR023C	32.9433	25.5874	1.28748	1.48257					YOR359W	YOR359W	37.7731	29.2516	1.29132	1.48188					YDR074W	YDR074W	37.488	29.2519	1.28156	1.48743
YDR462W	YDR462W	39.2434	30.4835	1.28736	1.4803					YPL158C	YPL158C	38.4997	29.8229	1.29094	1.4748					YKL113C	YKL113C	44.532	34.753	1.28139	1.4841
YHL029C	YHL029C	31.6725	24.6038	1.2873	1.47901					YDR297W	YDR297W	33.4201	25.8942	1.29064	1.46906					YHR087W	YHR087W	37.1005	28.9583	1.28117	1.47992
YIL121W	YIL121W	45.6352	35.451	1.28728	1.47855					YGL016W	YGL016W	35.8358	27.7662	1.29063	1.46882					YNR075W	YNR075W	46.0428	35.9417	1.28104	1.4774
YOL012C	YOL012C	34.1727	26.5522	1.287	1.47312					YOR027W	YOR027W	37.2593	28.8711	1.29054	1.46722					YHL033C	YHL033C	35.7741	27.9271	1.28098	1.47621
YJL168C	YJL168C	34.2548	26.6223	1.2867	1.4671					YBL061C	YBL061C	34.5079	26.7426	1.29037	1.46405					YIL018W	YIL018W	36.4396	28.4498	1.28084	1.47341
YDR485C	YDR485C	34.2486	26.6174	1.2867	1.46709					YHL047C	YHL047C	36.2538	28.1018	1.29009	1.45863					YHL005C	YHL005C	33.7492	26.354	1.28061	1.46903
YDR532C	YDR532C	38.8131	30.1692	1.28651	1.46347					YER139C	YER139C	37.6945	29.2464	1.28886	1.43537					YER139C	YER139C	36.7731	28.7393	1.27954	1.44827
YGL149W	YGL149W	36.2479	28.1759	1.28649	1.46288					YOR189W	YOR189W	37.8706	29.3953	1.28832	1.42527					YML102C-A	YML102C-A	42.3944	33.1325	1.27954	1.44824
YBL016W	YBL016W	37.9134	29.4761	1.28624	1.45803					YLR436C	YLR436C	35.905	27.8757	1.28804	1.41991					YOR123C	YOR123C	39.7126	31.0457	1.27917	1.44094
YER155C	YER155C	38.9096	30.257	1.28597	1.45265					YNL323W	YNL323W	37.6556	29.2363	1.28797	1.41867					YML102W	YML102W	40.2627	31.4899	1.27859	1.42975
YNL147W	YNL147W	35.4465	27.5719	1.2856	1.44536					YMR186W	YMR186W	39.1221	30.4054	1.28668	1.39421					YIL097W	YIL097W	37.9714	29.7001	1.2785	1.42791
YNR045W	YNR045W	32.8104	25.5615	1.28358	1.40535					YBR195C	YBR195C	39.8267	30.954	1.28664	1.39342					YPL049C	YPL049C	36.2962	28.3977	1.27814	1.42102
YNR004W	YNR004W	35.43	27.6075	1.28335	1.40071					YBR173C	YBR173C	37.4469	29.1264	1.28567	1.37504					YHR030C	YHR030C	37.3969	29.2719	1.27757	1.40993
YIL007C	YIL007C	33.9332	26.4567	1.28259	1.3857					YHL045W	YHL045W	37.1497	28.907	1.28515	1.36518					YAL020C	YAL020C	36.4482	28.558	1.27629	1.38497
YJR063W	YJR063W	42.6645	33.2813	1.28194	1.37272					YOR051C	YOR051C	37.1861	28.9445	1.28474	1.35739					YKL032C	YKL032C	39.1131	30.6493	1.27615	1.38233
YJR092W	YJR092W	34.5019	26.9161	1.28183	1.37064					YNL064C	YNL064C	37.8928	29.5109	1.28403	1.344					YJL166W	YJL166W	35.9504	28.1754	1.27595	1.37837
YJL115W	YJL115W	40.2962	31.4597	1.28088	1.35186					YDR074W	YDR074W	36.9774	28.8031	1.2838	1.33972					YJR054W	YJR054W	42.9591	33.6702	1.27588	1.3771
YLR358C	YLR358C	44.9938	35.1343	1.28063	1.34675					YBR023C	YBR023C	34.609	26.9896	1.28231	1.31146					YMR186W	YMR186W	39.2218	30.7429	1.2758	1.37548
YAL020C	YAL020C	34.9861	27.3252	1.28036	1.34158					YHR001W-A	YHR001W-A	34.8669	27.1935	1.28218	1.30899					YBL062W	YBL062W	38.0795	29.8657	1.27502	1.36046
YJL128C	YJL128C	35.9318	28.0655	1.28028	1.34					YDR007W	YDR007W	35.5357	27.7152	1.28218	1.30897					YML041C	YML041C	37.7628	29.6196	1.27493	1.35854
YDL047W	YDL047W	34.4106	26.8824	1.28004	1.33516					YML102W	YML102W	40.2599	31.4043	1.28199	1.30543					YIL124W	YIL124W	34.9423	27.4088	1.27486	1.35721
YOR123C	YOR123C	36.4706	28.4938	1.27995	1.33327					YJR054W	YJR054W	42.8862	33.4595	1.28174	1.30066					YHL045W	YHL045W	36.835	28.9054	1.27433	1.34692
YGL163C	YGL163C	34.5466	26.9925	1.27986	1.33158					YKR029C	YKR029C	37.6353	29.367	1.28155	1.29716					YHL047C	YHL047C	36.3731	28.5432	1.27432	1.34671
YMR070W	YMR070W	36.2837	28.3569	1.27954	1.32518					YLR182W	YLR182W	42.3683	33.0788	1.28083	1.28349					YIL053W	YIL053W	39.9423	31.347	1.2742	1.34442
YDR074W	YDR074W	35.2675	27.567	1.27934	1.32124					YDR364C	YDR364C	40.6351	31.7284	1.28072	1.28138					YBR023C	YBR023C	34.9274	27.4247	1.27358	1.33229
YJL179W	YJL179W	33.323	26.0616	1.27862	1.30709					YGL173C	YGL173C	45.2271	35.3275	1.28023	1.27208					YNR045W	YNR045W	36.2601	28.4853	1.27294	1.31995
YIL107C	YIL107C	34.665	27.1115	1.27861	1.30679					YOR025W	YOR025W	37.8568	29.5716	1.28017	1.27107					YGL163C	YGL163C	39.2428	30.8298	1.27289	1.31891
YJR011C	YJR011C	32.4957	25.4157	1.27857	1.30596					YER040W	YER040W	37.2205	29.0757	1.28012	1.27014					YLL020C	YLL020C	40.1624	31.5555	1.27275	1.31634
YDL133W	YDL133W	38.9639	30.4776	1.27844	1.3035					YJR049C	YJR049C	38.7398	30.2626	1.28012	1.27013					YER110C	YER110C	42.6664	33.5244	1.2727	1.31524
YNL065W	YNL065W	37.5991	29.4146	1.27825	1.29962					YKR101W	YKR101W	37.5238	29.3163	1.27997	1.26715					YBR173C	YBR173C	38.2318	30.0441	1.27252	1.31186
YMR022W	YMR022W	32.1934	25.1965	1.27769	1.28858					YMR031W-A	YMR031W-A	40.7497	31.8433	1.27969	1.26204					YDR540C	YDR540C	36.4827	28.6791	1.2721	1.30363
YNR019W	YNR019W	34.4164	26.9486	1.27711	1.27716					YBR200W	YBR200W	41.8841	32.7428	1.27918	1.25238					YDR117C	YDR117C	42.8414	33.6828	1.27191	1.29989
YIL116W	YIL116W	36.0377	28.2204	1.27701	1.27506					YNL065W	YNL065W	39.8735	31.1735	1.27908	1.2505					YLR085C	YLR085C	35.3674	27.811	1.2717	1.29592
YEL033W	YEL033W	35.3873	27.7192	1.27663	1.26765					YMR071C	YMR071C	39.1124	30.5792	1.27905	1.24988					YBL061C	YBL061C	33.9577	26.7132	1.27119	1.28597
YIL015W	YIL015W	36.7809	28.811	1.27663	1.26748					YGL033W	YGL033W	45.5228	35.5933	1.27897	1.24832					YNL199C	YNL199C	36.2534	28.5199	1.27116	1.28537
YJL166W	YJL166W	33.3452	26.1235	1.27644	1.26385					YIL035C	YIL035C	35.8352	28.0273	1.27858	1.24101					YJR049C	YJR049C	39.8751	31.3719	1.27105	1.28311
YLR182W	YLR182W	41.5012	32.5266	1.27592	1.25342					YER124C	YER124C	36.1704	28.3061	1.27783	1.22675					YBL106C	YBL106C	36.7411	28.9064	1.27104	1.28298
YNL199C	YNL199C	34.2622	26.8609	1.27554	1.24599					YDL116W	YDL116W	41.8442	32.7472	1.27779	1.22609					YOR025W	YOR025W	38.7377	30.4864	1.27066	1.27554
YHL019C	YHL019C	33.5007	26.2729	1.2751	1.23733					YPL086C	YPL086C	36.4905	28.565	1.27745	1.21962					YML013W	YML013W	36.5801	28.7922	1.27049	1.27224
YDR227W	YDR227W	35.1016	27.5285	1.2751	1.23723					YDR257C	YDR257C	35.0284	27.4226	1.27736	1.21778					YOL012C	YOL012C	37.3843	29.4253	1.27048	1.27216
YMR071C	YMR071C	36.2648	28.4502	1.27468	1.22885					YDR159W	YDR159W	43.8579	34.3416	1.27711	1.2131					YMR067C	YMR067C	39.6322	31.2	1.27026	1.26787
YDL106C	YDL106C	33.5748	26.3608	1.27366	1.20878					YBR277C	YBR277C	39.4823	30.9175	1.27702	1.21147					YIL050W	YIL050W	36.019	28.3573	1.27018	1.26638
YOL105C	YOL105C	36.6444	28.7728	1.27358	1.20713					YIL159W	YIL159W	37.4396	29.3237	1.27677	1.20676					YJL128C	YJL128C	37.8134	29.7767	1.2699	1.26084
YEL059W	YEL059W	34.7283	27.2713	1.27344	1.20429					YJL136C	YJL136C	38.3111	30.0073	1.27673	1.20594					YIL043C	YIL043C	36.7377	28.9485	1.26907	1.2448
YDL117W	YDL117W	37.5092	29.4554	1.27342	1.20399					YDR363W-A	YDR363W-A	37.4243	29.3203	1.2764	1.19962					YER007W	YER007W	38.7245	30.5144	1.26905	1.24443
YFL016C	YFL016C	35.4994	27.8847	1.27308	1.19724					YBL062W	YBL062W	38.4274	30.1074	1.27634	1.19864					YOL067C	YOL067C	35.3668	27.8724	1.26888	1.24102
YER139C	YER139C	34.8613	27.3944	1.27257	1.18713					YOR123C	YOR123C	39.3523	30.8413	1.27596	1.19143					YMR071C	YMR071C	37.9097	29.8883	1.26838	1.2313
YLR402W	YLR402W	33.0997	26.0159	1.27229	1.18149					YLR454W	YLR454W	36.5699	28.6657	1.27574	1.1872					YFL016C	YFL016C	38.0016	29.9722	1.2679	1.22193
YBL062W	YBL062W	36.2163	28.4736	1.27193	1.17434					YIL079C	YIL079C	36.4809	28.5968	1.2757	1.18643					YBL006C	YBL006C	43.1763	34.0625	1.26756	1.21537
YAL047C	YAL047C	45.6223	35.871	1.27184	1.17268					YDL106C	YDL106C	37.0532	29.0454	1.2757	1.18643					YHR080C	YHR080C	38.8575	30.6643	1.26719	1.20816
YBR194W	YBR194W	39.26	30.8709	1.27175	1.17081					YMR224C	YMR224C	37.0115	29.0141	1.27564	1.18529					YIL005W	YIL005W	35.4823	28.0037	1.26706	1.20563
YBR195C	YBR195C	38.0754	29.9445	1.27153	1.16658					YBR291C	YBR291C	38.371	30.0882	1.27528	1.17855					YLR417W	YLR417W	33.9877	26.8251	1.26701	1.20475
YMR216C	YMR216C	32.8932	25.8695	1.27151	1.16604					YER141W	YER141W	37.0794	29.0776	1.27519	1.17678					YJR011C	YJR011C	34.526	27.2515	1.26694	1.20329
YIL005W	YIL005W	33.2393	26.1433	1.27143	1.16452					YNR045W	YNR045W	36.1462	28.3461	1.27517	1.17648					YKR072C	YKR072C	37.0902	29.2779	1.26683	1.20126
YMR032W	YMR032W	45.2272	35.5734	1.27138	1.16349					YOL070C	YOL070C	37.2603	29.2207	1.27513	1.17575					YNL248C	YNL248C	40.787	32.2065	1.26642	1.19322
YGR252W	YGR252W	32.0884	25.2413	1.27127	1.16129					YIL116W	YIL116W	38.147	29.9225	1.27486	1.17057					YPL086C	YPL086C	36.5591	28.874	1.26616	1.18813
YAR015W	YAR015W	33.9276	26.6894	1.2712	1.15998					YNL147W	YNL147W	38.1772	29.9478	1.27479	1.16927					YOR295W	YOR295W	34.4935	27.2496	1.26584	1.18185
YLR417W	YLR417W	30.0564	23.6445	1.27118	1.15955					YIL093C	YIL093C	32.4442	25.4578	1.27443	1.16253					YIL049W	YIL049W	35.881	28.3465	1.2658	1.1811
YNR075W	YNR075W	42.0978	33.1193	1.27109	1.15787					YLL002W	YLL002W	42.7599	33.5564	1.27427	1.15938					YOR144C	YOR144C	39.8928	31.5166	1.26577	1.1806
YLR334C	YLR334C	34.8579	27.4282	1.27088	1.15364					YML048W	YML048W	36.5836	28.7146	1.27404	1.15508					YML048W	YML048W	37.7143	29.7969	1.26571	1.17946
YGR056W	YGR056W	38.6164	30.3909	1.27065	1.14915					YHL005C	YHL005C	32.969	25.8784	1.274	1.15426					YMR070W	YMR070W	38.4524	30.3804	1.2657	1.17918
YIL042C	YIL042C	32.4958	25.575	1.27061	1.14823					YOL105C	YOL105C	38.4569	30.1957	1.27359	1.14647					YBL016W	YBL016W	39.5597	31.26	1.26551	1.17544
YMR067C	YMR067C	36.4412	28.6809	1.27057	1.14752					YJL128C	YJL128C	37.817	29.6948	1.27352	1.14528					YJR077C	YJR077C	40.5106	32.0136	1.26542	1.17376
YGL035C	YGL035C	32.1471	25.3082	1.27022	1.1406					YJL159W	YJL159W	37.2117	29.2199	1.2735	1.1449					YIL006W	YIL006W	35.4853	28.0439	1.26535	1.17239
YJL169W	YJL169W	34.3148	27.0187	1.27004	1.13695					YLL059C	YLL059C	34.9751	27.4644	1.27347	1.14432					YOR241W	YOR241W	45.8097	36.2045	1.2653	1.17152
YPL158C	YPL158C	34.6859	27.3261	1.26933	1.12291					YIL006W	YIL006W	35.8034	28.1214	1.27317	1.13863					YPL066W	YPL066W	38.5384	30.46	1.26522	1.1698
YIL124W	YIL124W	33.4548	26.3566	1.26931	1.12256					YIL042C	YIL042C	35.9562	28.2427	1.27311	1.13752					YJL182C	YJL182C	36.6281	28.9509	1.26518	1.16915
YML048W	YML048W	34.0063	26.7949	1.26913	1.11902					YNL199C	YNL199C	36.024	28.3068	1.27263	1.12831					YBL103C	YBL103C	36.8526	29.1304	1.26509	1.16735
YBR291C	YBR291C	35.8802	28.2727	1.26908	1.11791					YNR059W	YNR059W	35.5017	27.8994	1.27249	1.12573					YKR101W	YKR101W	36.8213	29.1258	1.26422	1.15037
YNR031C	YNR031C	35.0054	27.5835	1.26907	1.11783					YAR015W	YAR015W	37.201	29.238	1.27235	1.12313					YDR297W	YDR297W	34.0963	26.9711	1.26418	1.14964
YGL194C	YGL194C	35.6521	28.1062	1.26848	1.106					YOR295W	YOR295W	33.7773	26.5551	1.27197	1.1159					YDL117W	YDL117W	38.9906	30.8511	1.26383	1.14289
YHL025W	YHL025W	36.8512	29.0611	1.26806	1.09769					YOR209C	YOR209C	37.1228	29.1864	1.27192	1.11498					YHL027W	YHL027W	35.5703	28.1451	1.26382	1.14264
YJR049C	YJR049C	36.2338	28.5786	1.26787	1.09389					YNL225C	YNL225C	33.8367	26.6031	1.27191	1.11475					YMR080C	YMR080C	39.4831	31.2458	1.26363	1.139
YPL078C	YPL078C	37.6657	29.714	1.26761	1.08876					YOL025W	YOL025W	37.4459	29.4436	1.27178	1.11232					YHR013C	YHR013C	39.2765	31.095	1.26311	1.1289
YGR107W	YGR107W	32.9556	26.0001	1.26752	1.08698					YIL050W	YIL050W	35.2325	27.7126	1.27135	1.10423					YDR146C	YDR146C	36.1012	28.5821	1.26307	1.1281
YOL070C	YOL070C	33.7408	26.6231	1.26735	1.08363					YOR047C	YOR047C	36.13	28.4226	1.27117	1.1008					YNR059W	YNR059W	35.4006	28.0361	1.26268	1.12048
YKL113C	YKL113C	42.1012	33.2219	1.26727	1.08214					YLR358C	YLR358C	48.8439	38.4263	1.27111	1.09959					YJL168C	YJL168C	37.0441	29.3419	1.2625	1.11698
YNL225C	YNL225C	33.4925	26.4442	1.26653	1.06748					YJR011C	YJR011C	34.7403	27.3319	1.27105	1.09859					YDL190C	YDL190C	35.398	28.0428	1.26229	1.11287
YER040W	YER040W	34.7563	27.4528	1.26604	1.05772					YOR308C	YOR308C	39.4941	31.072	1.27105	1.09854					YER141W	YER141W	37.5582	29.757	1.26216	1.11046
YKR010C	YKR010C	34.2092	27.0211	1.26602	1.05723					YHL007C	YHL007C	34.6473	27.2633	1.27084	1.09452					YHL019C	YHL019C	36.2351	28.7097	1.26212	1.10965
YMR224C	YMR224C	36.3742	28.7314	1.26601	1.05707					YBR231C	YBR231C	39.1153	30.7895	1.27041	1.0864					YJL169W	YJL169W	37.4923	29.7073	1.26206	1.10844
YAL040C	YAL040C	34.785	27.4839	1.26565	1.04992					YAL040C	YAL040C	36.5197	28.7469	1.27039	1.08598					YBR277C	YBR277C	39.2947	31.1375	1.26197	1.10677
YJL159W	YJL159W	35.1102	27.7423	1.26558	1.04861					YHR094C	YHR094C	35.7342	28.1332	1.27018	1.08199					YBR194W	YBR194W	42.4483	33.6387	1.26189	1.10516
YOR047C	YOR047C	33.9816	26.8526	1.26549	1.04678					YKL032C	YKL032C	38.0228	29.9353	1.27016	1.08174					YDR363W-A	YDR363W-A	37.3425	29.593	1.26187	1.10479
YIL012W	YIL012W	35.6977	28.2142	1.26524	1.04188					YNL179C	YNL179C	36.5458	28.7753	1.27004	1.07939					YNR031C	YNR031C	37.3789	29.6346	1.26132	1.09417
YBR093C	YBR093C	32.6619	25.8154	1.26521	1.0413					YJR018W	YJR018W	40.1716	31.6372	1.26976	1.07403					YMR316W	YMR316W	37.0132	29.3474	1.26121	1.09194
YMR151W	YMR151W	34.0994	26.9534	1.26512	1.03954					YPL144W	YPL144W	35.0715	27.6264	1.26949	1.069					YIL145C	YIL145C	35.7739	28.3766	1.26068	1.08173
YKR072C	YKR072C	35.0217	27.6835	1.26508	1.03861					YGL163C	YGL163C	36.9578	29.1135	1.26944	1.06807					YBR130C	YBR130C	35.4771	28.1525	1.26018	1.07185
YIL066C	YIL066C	34.9432	27.6239	1.26496	1.03635					YJL166W	YJL166W	35.4641	27.9419	1.26921	1.06369					YNL078W	YNL078W	38.2131	30.3298	1.25992	1.06682
YDR363W-A	YDR363W-A	34.0399	26.9133	1.2648	1.03307					YIL124W	YIL124W	34.6026	27.2677	1.26899	1.05958					YLR019W	YLR019W	36.584	29.042	1.25969	1.06251
YHR030C	YHR030C	34.2663	27.0964	1.26461	1.02934					YHR013C	YHR013C	38.9868	30.7233	1.26897	1.05906					YDL106C	YDL106C	36.5794	29.0496	1.25921	1.053
YER007W	YER007W	35.8558	28.3571	1.26444	1.02599					YJR060W	YJR060W	35.6159	28.068	1.26891	1.05811					YPR049C	YPR049C	38.9269	30.9318	1.25848	1.03881
YMR048W	YMR048W	33.1812	26.2437	1.26435	1.02417					YHR121W	YHR121W	36.7864	28.992	1.26885	1.05682					YML008C	YML008C	38.0825	30.2624	1.25841	1.03755
YMR312W	YMR312W	34.7874	27.5153	1.26429	1.02306					YHL035C	YHL035C	35.5436	28.0132	1.26882	1.05628					YHR047C	YHR047C	35.8723	28.5106	1.25821	1.03368
YJR060W	YJR060W	32.5285	25.7305	1.2642	1.0212					YNL201C	YNL201C	37.8084	29.8014	1.26868	1.05363					YNL201C	YNL201C	37.5204	29.8224	1.25813	1.0321
YIL111W	YIL111W	34.363	27.1838	1.2641	1.01922					YNL094W	YNL094W	35.003	27.5919	1.2686	1.05209					YOR038C	YOR038C	38.7099	30.7697	1.25805	1.03059
YIL049W	YIL049W	33.163	26.2401	1.26383	1.01382					YOL147C	YOL147C	35.3348	27.8565	1.26846	1.04949					YOR193W	YOR193W	38.7569	30.8082	1.25801	1.02969
YIL098C	YIL098C	32.6966	25.8756	1.26361	1.00951					YLR046C	YLR046C	36.9242	29.1115	1.26837	1.04782					YGL016W	YGL016W	34.7308	27.608	1.258	1.0295
YDR540C	YDR540C	34.5446	27.3421	1.26342	1.00584					YGR196C	YGR196C	37.7909	29.7965	1.2683	1.04646					YHL035C	YHL035C	35.5466	28.2601	1.25784	1.02642
YIL006W	YIL006W	34.2084	27.0761	1.26342	1.00574					YNR050C	YNR050C	38.3552	30.2457	1.26812	1.04311					YBR061C	YBR061C	36.3884	28.9384	1.25744	1.01872
YPL049C	YPL049C	34.5207	27.3233	1.26341	1.00566					YIL103W	YIL103W	36.6909	28.9359	1.268	1.04089					YNL259C	YNL259C	34.9231	27.7754	1.25734	1.01674
YML102C-A	YML102C-A	40.3202	31.9237	1.26302	0.997804					YNL224C	YNL224C	41.2922	32.5651	1.26799	1.04059					YOR183W	YOR183W	37.4119	29.7587	1.25717	1.01352
YKL138C	YKL138C	31.9994	25.3362	1.26299	0.9973					YEL062W	YEL062W	36.9235	29.1201	1.26797	1.04029					YHR200W	YHR200W	40.3657	32.1094	1.25713	1.01264
YPR188C	YPR188C	33.4889	26.5171	1.26292	0.995858					YML041C	YML041C	36.3723	28.6863	1.26793	1.03953					YBR291C	YBR291C	38.0684	30.2834	1.25707	1.01152
YIL057C	YIL057C	33.622	26.6262	1.26274	0.992278					YHL028W	YHL028W	36.1607	28.5269	1.2676	1.03327					YIL093C	YIL093C	32.5544	25.8971	1.25707	1.0114
YDR297W	YDR297W	31.5171	24.9613	1.26264	0.990339					YMR316W	YMR316W	36.5401	28.8286	1.26749	1.03123					YHR001W-A	YHR001W-A	35.1284	27.9454	1.25704	1.01084
YIL043C	YIL043C	33.8555	26.8159	1.26252	0.987868					YEL033W	YEL033W	37.8035	29.8264	1.26745	1.03039					YEL033W	YEL033W	38.8785	30.9289	1.25703	1.01067
YDR007W	YDR007W	34.1315	27.0349	1.2625	0.987459					YIL049W	YIL049W	35.6275	28.1106	1.2674	1.02949					YOL025W	YOL025W	37.2853	29.6651	1.25687	1.0077
YLR052W	YLR052W	33.6704	26.6761	1.26219	0.981468					YNR031C	YNR031C	36.5867	28.869	1.26733	1.0282					YAR015W	YAR015W	37.4491	29.7973	1.2568	1.00621
YHR034C	YHR034C	34.1725	27.0742	1.26218	0.981216					YGR200C	YGR200C	36.7334	28.9898	1.26711	1.02405					YIL007C	YIL007C	36.171	28.7809	1.25677	1.00573
YHR200W	YHR200W	36.8263	29.1777	1.26214	0.980378					YPL078C	YPL078C	39.9512	31.536	1.26684	1.01894					YOL019W	YOL019W	36.0367	28.6749	1.25674	1.00499
YDL116W	YDL116W	37.497	29.7159	1.26185	0.97468					YJL063C	YJL063C	35.9743	28.3969	1.26684	1.01889					YNL224C	YNL224C	40.8965	32.5697	1.25566	0.984105
YOR193W	YOR193W	36.4929	28.9205	1.26184	0.974421					YGL215W	YGL215W	35.6964	28.1841	1.26654	1.01325					YKR047W	YKR047W	36.1643	28.8039	1.25553	0.981654
YIL092W	YIL092W	34.4571	27.3072	1.26183	0.974316					YMR104C	YMR104C	34.8468	27.5182	1.26632	1.00901					YDR448W	YDR448W	36.6014	29.1616	1.25512	0.973617
YDR146C	YDR146C	34.9357	27.6881	1.26176	0.972841					YDR448W	YDR448W	36.1817	28.5838	1.26581	0.999356					YGR019W	YGR019W	44.7601	35.6644	1.25503	0.971937
YNR059W	YNR059W	33.7088	26.7162	1.26173	0.972379					YBL103C	YBL103C	36.2286	28.6216	1.26578	0.998782					YGR056W	YGR056W	43.244	34.4566	1.25503	0.97184
YHL047C	YHL047C	34.5084	27.3504	1.26171	0.971963					YIL005W	YIL005W	35.8759	28.3538	1.2653	0.989633					YIL107C	YIL107C	36.6331	29.1932	1.25485	0.968361
YJL182C	YJL182C	35.3397	28.0096	1.2617	0.9717					YIL092W	YIL092W	36.2323	28.6358	1.26528	0.989357					YOL105C	YOL105C	38.2669	30.5027	1.25454	0.962329
YKR024C	YKR024C	37.3798	29.6278	1.26165	0.970603					YOR284W	YOR284W	36.1727	28.5899	1.26523	0.988327					YHR031C	YHR031C	45.98	36.6538	1.25444	0.960383
YDR257C	YDR257C	32.0938	25.4421	1.26145	0.966644					YHL008C	YHL008C	37.3798	29.5448	1.26519	0.987668					YLR402W	YLR402W	36.6082	29.1831	1.25443	0.960228
YLL002W	YLL002W	38.0724	30.186	1.26126	0.962954					YIL100W	YIL100W	34.0583	26.9203	1.26515	0.986965					YIL055C	YIL055C	36.9704	29.472	1.25443	0.960106
YEL041W	YEL041W	33.9509	26.9229	1.26104	0.958638					YMR080C	YMR080C	39.3621	31.1206	1.26483	0.980763					YBL021C	YBL021C	33.9736	27.0846	1.25435	0.958671
YJR054W	YJR054W	38.1868	30.2837	1.26097	0.957197					YDR174W	YDR174W	37.807	29.892	1.26479	0.980015					YGR200C	YGR200C	36.6288	29.2043	1.25423	0.956221
YMR154C	YMR154C	31.115	24.6769	1.2609	0.955793					YKR072C	YKR072C	37.0465	29.2924	1.26471	0.97859					YDL078C	YDL078C	36.1888	28.8563	1.2541	0.953858
YHL017W	YHL017W	33.2016	26.3368	1.26065	0.950963					YEL023C	YEL023C	36.2467	28.6606	1.26469	0.978123					YKL074C	YKL074C	36.8575	29.3937	1.25393	0.950368
YHL045W	YHL045W	34.2622	27.1808	1.26053	0.948494					YMR133W	YMR133W	34.6675	27.414	1.26459	0.976305					YNL147W	YNL147W	38.7301	30.891	1.25376	0.947245
YIL018W	YIL018W	34.3248	27.2355	1.2603	0.943886					YDR334W	YDR334W	40.9822	32.4076	1.26458	0.976164					YLR454W	YLR454W	35.9804	28.6991	1.25371	0.946203
YJL071W	YJL071W	35.21	27.9382	1.26028	0.943518					YDL047W	YDL047W	37.2321	29.4441	1.2645	0.974604					YER040W	YER040W	37.2168	29.6889	1.25356	0.943218
YOR039W	YOR039W	36.0334	28.5927	1.26023	0.942554					YOR213C	YOR213C	36.4313	28.8119	1.26445	0.973701					YGL035C	YGL035C	34.5984	27.6004	1.25355	0.943069
YPL101W	YPL101W	35.382	28.0856	1.25979	0.933846					YER097W	YER097W	34.1294	26.992	1.26443	0.973172					YIL054W	YIL054W	39.4723	31.4889	1.25353	0.942674
YCL001W-A	YCL001W-A	36.0513	28.6184	1.25972	0.932522					YDR146C	YDR146C	36.3803	28.7739	1.26435	0.971787					YJL212C	YJL212C	34.8809	27.8278	1.25346	0.941236
YBR200W	YBR200W	40.3191	32.0082	1.25965	0.931043					YPL089C	YPL089C	36.7136	29.0376	1.26435	0.971707					YIL092W	YIL092W	36.3325	28.9895	1.2533	0.938204
YNL094W	YNL094W	32.8959	26.1157	1.25962	0.930413					YMR070W	YMR070W	37.374	29.5628	1.26423	0.96943					YIL042C	YIL042C	36.1141	28.8154	1.25329	0.938021
YOR241W	YOR241W	42.0467	33.3807	1.25961	0.930308					YPR120C	YPR120C	40.9723	32.4097	1.2642	0.968925					YIL079C	YIL079C	36.3735	29.0237	1.25323	0.936926
YMR080C	YMR080C	36.9489	29.3375	1.25944	0.926933					YJL208C	YJL208C	36.9334	29.2194	1.264	0.965187					YNR050C	YNR050C	39.0802	31.1891	1.25301	0.932548
YHR123W	YHR123W	33.67	26.7365	1.25933	0.924625					YKL121W	YKL121W	38.7124	30.6287	1.26392	0.963696					YOR178C	YOR178C	43.6678	34.8691	1.25234	0.919474
YOR279C	YOR279C	33.9558	26.9648	1.25927	0.923456					YPL115C	YPL115C	36.4792	28.8646	1.2638	0.96143					YOR308C	YOR308C	38.07	30.4061	1.25205	0.914009
YAL048C	YAL048C	32.945	26.1712	1.25882	0.914709					YHR047C	YHR047C	35.0823	27.7593	1.2638	0.961381					YJL071W	YJL071W	37.6678	30.0913	1.25178	0.908738
YML102W	YML102W	38.0998	30.2703	1.25865	0.911312					YCR025C	YCR025C	38.8905	30.7727	1.2638	0.961365					YKR073C	YKR073C	36.6904	29.3108	1.25177	0.908491
YIL023C	YIL023C	33.6035	26.6982	1.25864	0.911135					YOL012C	YOL012C	37.8892	29.9871	1.26351	0.955942					YJL152W	YJL152W	35.5119	28.3777	1.2514	0.901325
YNL179C	YNL179C	33.4451	26.5748	1.25853	0.90882					YBR130C	YBR130C	35.3247	27.9605	1.26338	0.953386					YAL040C	YAL040C	36.4583	29.1349	1.25136	0.900528
YBR130C	YBR130C	33.4312	26.5645	1.25849	0.908077					YJL182C	YJL182C	36.5318	28.9161	1.26337	0.95325					YDR007W	YDR007W	35.2383	28.1645	1.25116	0.896618
YMR036C	YMR036C	34.6261	27.5162	1.25839	0.906044					YOR241W	YOR241W	45.2154	35.7918	1.26329	0.95165					YHR121W	YHR121W	37.4121	29.9041	1.25107	0.894873
YHR013C	YHR013C	37.1119	29.4928	1.25834	0.905101					YPL066W	YPL066W	37.7041	29.8462	1.26328	0.95151					YPR141C	YPR141C	40.4531	32.335	1.25106	0.894738
YNL329C	YNL329C	32.3037	25.6772	1.25807	0.899745					YDL117W	YDL117W	38.9467	30.8301	1.26327	0.951306					YBR111C	YBR111C	36.7946	29.4166	1.25081	0.88986
YIL145C	YIL145C	34.5757	27.4857	1.25795	0.897403					YIL128W	YIL128W	35.3698	27.9987	1.26327	0.95124					YNL179C	YNL179C	35.5427	28.4193	1.25065	0.886793
YIL125W	YIL125W	34.71	27.5966	1.25777	0.89371					YKR047W	YKR047W	36.4382	28.8467	1.26317	0.949433					YEL015W	YEL015W	45.492	36.3758	1.25061	0.88596
YMR100W	YMR100W	34.2336	27.218	1.25776	0.893513					YIL023C	YIL023C	35.9774	28.4836	1.26309	0.94796					YPL144W	YPL144W	35.9207	28.723	1.25059	0.885572
YOR073W	YOR073W	33.7811	26.8605	1.25765	0.891398					YKR096W	YKR096W	36.7154	29.0707	1.26297	0.94563					YHR034C	YHR034C	36.834	29.4554	1.2505	0.883839
YJL095W	YJL095W	33.562	26.6941	1.25728	0.884052					YOL067C	YOL067C	36.056	28.5533	1.26276	0.941658					YDR364C	YDR364C	40.3678	32.2813	1.2505	0.883802
YHL027W	YHL027W	32.2882	25.6824	1.25721	0.882674					YHR093W	YHR093W	36.2482	28.7078	1.26266	0.939798					YLR024C	YLR024C	37.4983	29.988	1.25044	0.882639
YOR144C	YOR144C	39.1635	31.1566	1.25699	0.878376					YHR123W	YHR123W	36.2861	28.7388	1.26262	0.938957					YHR123W	YHR123W	36.3814	29.0996	1.25024	0.878685
YOR025W	YOR025W	36.8369	29.309	1.25684	0.875449					YIL043C	YIL043C	35.7667	28.3329	1.26237	0.93431					YBR286W	YBR286W	38.8163	31.049	1.25016	0.877239
YLR322W	YLR322W	46.3855	36.907	1.25682	0.875032					YOL007C	YOL007C	36.5266	28.9355	1.26235	0.933857					YIL111W	YIL111W	36.8534	29.4795	1.25013	0.876703
YGR111W	YGR111W	33.0494	26.2979	1.25673	0.873201					YGL181W	YGL181W	35.4659	28.0956	1.26233	0.933514					YIL038C	YIL038C	37.589	30.0707	1.25002	0.874495
YPL089C	YPL089C	34.4501	27.421	1.25634	0.865476					YMR216C	YMR216C	34.2591	27.1448	1.26209	0.92896					YML094W	YML094W	35.6148	28.4924	1.24998	0.873624
YHR117W	YHR117W	33.4635	26.6368	1.25629	0.864485					YMR077C	YMR077C	35.4403	28.0827	1.262	0.927242					YCR036W	YCR036W	38.4962	30.798	1.24996	0.873247
YDR466W	YDR466W	34.7555	27.6683	1.25615	0.861631					YLR417W	YLR417W	33.1288	26.2557	1.26177	0.922991					YEL072W	YEL072W	36.1076	28.8971	1.24953	0.864853
YDR176W	YDR176W	35.5603	28.3133	1.25595	0.857825					YHR104W	YHR104W	35.7533	28.3438	1.26141	0.916189					YHL025W	YHL025W	39.0593	31.2613	1.24945	0.863296
YGR072W	YGR072W	36.847	29.3405	1.25584	0.85564					YLR113W	YLR113W	37.5758	29.8001	1.26093	0.907046					YOR264W	YOR264W	37.1762	29.7569	1.24933	0.861049
YKR028W	YKR028W	32.3133	25.7308	1.25582	0.855137					YKL053W	YKL053W	39.4596	31.2961	1.26085	0.905509					YOR231W	YOR231W	33.1979	26.5742	1.24925	0.859507
YOR308C	YOR308C	35.5456	28.309	1.25563	0.851403					YIL071C	YIL071C	35.7705	28.3832	1.26027	0.894583					YOR213C	YOR213C	36.5967	29.2953	1.24924	0.859268
YIL112W	YIL112W	33.1459	26.398	1.25562	0.851242					YBR284W	YBR284W	38.8258	30.8082	1.26024	0.894086					YBR231C	YBR231C	38.5397	30.8525	1.24916	0.857733
YER141W	YER141W	35.226	28.0565	1.25554	0.849574					YCR063W	YCR063W	40.5541	32.1802	1.26022	0.893601					YPL115C	YPL115C	36.0177	28.8357	1.24907	0.85599
YKR047W	YKR047W	33.7667	26.8948	1.25551	0.848995					YJL198W	YJL198W	36.8833	29.2693	1.26014	0.892016					YKL164C	YKL164C	37.9248	30.3682	1.24883	0.851422
YLR046C	YLR046C	34.7193	27.6548	1.25545	0.847846					YOR183W	YOR183W	37.6478	29.8799	1.25997	0.888887					YLL002W	YLL002W	40.286	32.265	1.2486	0.846854
YKR073C	YKR073C	34.6503	27.6011	1.2554	0.846759					YDL122W	YDL122W	34.6822	27.5286	1.25986	0.886858					YGR107W	YGR107W	36.2788	29.0582	1.24849	0.844646
YDL190C	YDL190C	33.8677	26.979	1.25534	0.845579					YHL017W	YHL017W	36.1836	28.7207	1.25984	0.886517					YKL121W	YKL121W	39.0007	31.2384	1.24848	0.844591
YOL003C	YOL003C	34.2381	27.2774	1.25518	0.842464					YDL078C	YDL078C	36.2493	28.7751	1.25975	0.884642					YIL023C	YIL023C	36.3982	29.1575	1.24833	0.841676
YMR075W	YMR075W	35.4416	28.2397	1.25503	0.839482					YIL018W	YIL018W	36.5344	29.0015	1.25974	0.884599					YJR018W	YJR018W	38.7051	31.0061	1.2483	0.8411
YGR200C	YGR200C	34.3313	27.3573	1.25492	0.837369					YJL099W	YJL099W	37.3665	29.6639	1.25966	0.883107					YMR075W	YMR075W	37.9359	30.3907	1.24827	0.840494
YDR117C	YDR117C	40.1894	32.0342	1.25458	0.830594					YBR286W	YBR286W	38.6731	30.7126	1.2592	0.874249					YJL099W	YJL099W	36.2095	29.0124	1.24807	0.836604
YMR055C	YMR055C	32.4637	25.8787	1.25446	0.828127					YGL194C	YGL194C	39.0305	30.9967	1.25918	0.873983					YGL019W	YGL019W	36.9454	29.6036	1.248	0.835241
YIL055C	YIL055C	34.2879	27.3355	1.25433	0.825708					YNL303W	YNL303W	35.6918	28.3503	1.25895	0.869683					YEL062W	YEL062W	37.0797	29.7162	1.24779	0.831167
YML013W	YML013W	34.1713	27.2471	1.25412	0.821532					YLR019W	YLR019W	36.0288	28.6203	1.25885	0.86777					YJR083C	YJR083C	35.4012	28.3721	1.24775	0.830321
YHR047C	YHR047C	33.5594	26.7602	1.25408	0.820678					YNL291C	YNL291C	36.8391	29.2662	1.25876	0.86595					YOL141W	YOL141W	33.7808	27.0738	1.24773	0.830004
YDR173C	YDR173C	39.2409	31.2919	1.25403	0.819642					YHR033W	YHR033W	37.6845	29.9396	1.25868	0.864559					YNL154C	YNL154C	35.6678	28.5894	1.24759	0.8272
YKR042W	YKR042W	33.9626	27.0842	1.25396	0.818378					YBR061C	YBR061C	36.2555	28.8044	1.25868	0.864446					YOR073W	YOR073W	35.8061	28.7021	1.24751	0.825669
YGL072C	YGL072C	38.0603	30.3549	1.25384	0.815994					YPL203W	YPL203W	37.052	29.4417	1.25849	0.860831					YHR134W	YHR134W	37.3546	29.9534	1.24709	0.817528
YHR087W	YHR087W	34.4296	27.4607	1.25378	0.814645					YNL264C	YNL264C	36.9562	29.3696	1.25832	0.857588					YJL136C	YJL136C	38.0213	30.4884	1.24707	0.817201
YMR063W	YMR063W	31.8707	25.4212	1.2537	0.813232					YBR111C	YBR111C	36.2245	28.7884	1.2583	0.85735					YPL203W	YPL203W	36.86	29.558	1.24704	0.816491
YPL174C	YPL174C	32.6784	26.0692	1.25352	0.809629					YHR200W	YHR200W	41.9174	33.3132	1.25828	0.856963					YPL101W	YPL101W	37.4875	30.0639	1.24693	0.81436
YMR031C	YMR031C	32.6279	26.0324	1.25336	0.806332					YPR188C	YPR188C	35.5141	28.2252	1.25824	0.856139					YJL144W	YJL144W	37.1945	29.8296	1.2469	0.813844
YER093C-A	YER093C-A	31.3898	25.0454	1.25331	0.805493					YDL013W	YDL013W	38.3521	30.4839	1.25811	0.853665					YHL028W	YHL028W	36.5683	29.3302	1.24678	0.81146
YNL307C	YNL307C	33.8712	27.0264	1.25326	0.804485					YLR455W	YLR455W	37.7872	30.0357	1.25808	0.853042					YPL089C	YPL089C	36.9252	29.6202	1.24662	0.808457
YHR168W	YHR168W	32.5869	26.0041	1.25315	0.802176					YBL006C	YBL006C	42.8794	34.0902	1.25782	0.848248					YOL003C	YOL003C	36.7039	29.4436	1.24658	0.807666
YNL078W	YNL078W	35.8501	28.6089	1.25311	0.801452					YDR466W	YDR466W	37.2362	29.6041	1.25781	0.847985					YIL112W	YIL112W	35.1305	28.1833	1.2465	0.806038
YOR222W	YOR222W	32.9932	26.3318	1.25298	0.798862					YJL152W	YJL152W	35.5746	28.2874	1.25761	0.844309					YLR334C	YLR334C	37.4869	30.0771	1.24636	0.803304
YOL023W	YOL023W	31.3153	24.993	1.25296	0.798505					YNL307C	YNL307C	37.0768	29.4823	1.25759	0.843959					YDR176W	YDR176W	36.9589	29.6581	1.24616	0.799543
YLR454W	YLR454W	33.1591	26.4704	1.25268	0.793009					YHL027W	YHL027W	35.1506	27.9508	1.25759	0.84382					YKL138C	YKL138C	35.3977	28.4062	1.24612	0.798716
YPR049C	YPR049C	36.5529	29.1814	1.25261	0.791581					YML094W	YML094W	35.8263	28.4881	1.25759	0.843793					YDR514C	YDR514C	34.5423	27.7203	1.2461	0.798264
YCR026C	YCR026C	35.9392	28.6941	1.25249	0.78924					YBL071C	YBL071C	37.2148	29.5926	1.25757	0.843509					YIL101C	YIL101C	36.4186	29.2286	1.24599	0.79615
YHL038C	YHL038C	30.2898	24.1865	1.25234	0.786232					YCL001W-A	YCL001W-A	37.7568	30.0241	1.25755	0.843048					YBR093C	YBR093C	33.8287	27.1532	1.24585	0.793371
YKL031W	YKL031W	33.6804	26.8959	1.25225	0.784468					YKR035W-A	YKR035W-A	36.3461	28.9024	1.25755	0.843038					YMR100W	YMR100W	35.7007	28.6591	1.2457	0.79058
YCR077C	YCR077C	34.4875	27.5469	1.25195	0.778526					YHL019C	YHL019C	35.6816	28.3743	1.25753	0.842739					YDR195W	YDR195W	41.0779	32.9812	1.24549	0.78651
YHR037W	YHR037W	34.9458	27.9137	1.25192	0.777906					YDR319C	YDR319C	37.5335	29.8484	1.25747	0.841604					YHR022C	YHR022C	34.9509	28.0633	1.24543	0.785334
YBR061C	YBR061C	33.8928	27.0742	1.25185	0.776445					YLR024C	YLR024C	37.4762	29.8047	1.25739	0.840168					YHL014C	YHL014C	36.2958	29.1434	1.24542	0.785128
YOR178C	YOR178C	38.6361	30.8654	1.25176	0.774695					YOR178C	YOR178C	41.4171	32.9399	1.25735	0.83936					YHR035W	YHR035W	36.1298	29.0106	1.2454	0.784716
YHL028W	YHL028W	33.8828	27.0714	1.25161	0.77167					YKR010C	YKR010C	36.3746	28.9304	1.25732	0.838667					YLR455W	YLR455W	37.9197	30.4488	1.24536	0.78385
YFR048W	YFR048W	32.8935	26.2848	1.25143	0.768102					YPL270W	YPL270W	35.9967	28.6323	1.25721	0.836623					YGL194C	YGL194C	38.5741	30.9753	1.24532	0.783098
YGL016W	YGL016W	32.0613	25.6239	1.25123	0.764119					YHR075C	YHR075C	36.4015	28.9543	1.2572	0.836581					YGR063C	YGR063C	33.6435	27.0177	1.24524	0.78159
YLR407W	YLR407W	36.4819	29.159	1.25114	0.762378					YOR197W	YOR197W	36.279	28.8581	1.25715	0.835585					YPR007C	YPR007C	36.7656	29.53	1.24503	0.77741
YOR200W	YOR200W	32.4035	25.9022	1.25099	0.759453					YDL051W	YDL051W	35.9449	28.593	1.25712	0.835052					YOR209C	YOR209C	37.125	29.8252	1.24475	0.772061
YKL164C	YKL164C	35.6758	28.5182	1.25099	0.759342					YNL032W	YNL032W	34.9455	27.8011	1.25698	0.832388					YPL055C	YPL055C	38.1318	30.6348	1.24472	0.77155
YMR316W	YMR316W	34.0311	27.2046	1.25093	0.758263					YNL259C	YNL259C	34.8229	27.7042	1.25695	0.831831					YOL007C	YOL007C	36.6226	29.4237	1.24466	0.77038
YOL147C	YOL147C	32.8061	26.2308	1.25067	0.753112					YCR067C	YCR067C	35.9235	28.581	1.2569	0.830848					YDR174W	YDR174W	38.2507	30.7362	1.24448	0.766837
YLR418C	YLR418C	35.2259	28.1661	1.25065	0.752661					YJL151C	YJL151C	35.0641	27.9005	1.25676	0.828095					YFR044C	YFR044C	35.8623	28.8177	1.24445	0.766268
YPL203W	YPL203W	33.7472	26.9855	1.25057	0.75104					YOR024W	YOR024W	38.1612	30.3666	1.25668	0.826675					YHR159W	YHR159W	36.1359	29.0381	1.24443	0.765901
YGR063C	YGR063C	32.0397	25.6224	1.25046	0.748881					YHR159W	YHR159W	35.4809	28.2397	1.25642	0.821779					YHR117W	YHR117W	36.0944	29.0051	1.24442	0.765534
YOR183W	YOR183W	35.094	28.0673	1.25035	0.746843					YER030W	YER030W	36.7698	29.2681	1.25631	0.819652					YGL072C	YGL072C	39.0521	31.3878	1.24418	0.760926
YJR018W	YJR018W	35.8251	28.653	1.25031	0.745988					YHR134W	YHR134W	37.858	30.1375	1.25617	0.817066					YJL159W	YJL159W	37.6976	30.3038	1.24399	0.757264
YDL151C	YDL151C	35.2204	28.1719	1.2502	0.743716					YOR264W	YOR264W	36.9826	29.4413	1.25615	0.816586					YLR052W	YLR052W	36.643	29.4567	1.24396	0.756762
YBL010C	YBL010C	31.9808	25.5806	1.25019	0.74367					YBL047C	YBL047C	39.1198	31.1431	1.25613	0.81626					YGL136C	YGL136C	40.3813	32.4619	1.24396	0.756687
YHL008C	YHL008C	35.3769	28.2988	1.25012	0.742166					YGR122W	YGR122W	35.6989	28.4212	1.25606	0.814999					YJL151C	YJL151C	35.0912	28.2105	1.24391	0.755621
YLR426W	YLR426W	34.5822	27.6641	1.25007	0.741273					YNL154C	YNL154C	35.279	28.0908	1.25589	0.811797					YGR196C	YGR196C	37.382	30.0523	1.2439	0.755498
YDR334W	YDR334W	36.495	29.1958	1.25001	0.739968					YIL145C	YIL145C	35.62	28.3625	1.25588	0.811606					YOR051C	YOR051C	36.8009	29.5855	1.24388	0.7552
YAL019W	YAL019W	32.101	25.683	1.2499	0.737757					YGR056W	YGR056W	42.694	34.0071	1.25544	0.803245					YBR200W	YBR200W	41.5322	33.3937	1.24371	0.751912
YJL145W	YJL145W	34.5146	27.6149	1.24985	0.736914					YCL037C	YCL037C	39.8308	31.7274	1.2554	0.802521					YNL307C	YNL307C	36.7638	29.56	1.2437	0.751648
YOR043W	YOR043W	34.5782	27.6665	1.24982	0.736338					YIL111W	YIL111W	36.314	28.9274	1.25535	0.801499					YOR279C	YOR279C	36.106	29.0324	1.24364	0.750553
YDR251W	YDR251W	34.2707	27.426	1.24957	0.731276					YOR231W	YOR231W	33.1711	26.426	1.25525	0.799523					YNL225C	YNL225C	33.9713	27.3168	1.2436	0.749754
YGR285C	YGR285C	32.1977	25.7687	1.24949	0.729713					YOR279C	YOR279C	35.4067	28.2104	1.2551	0.796672					YLL059C	YLL059C	35.1386	28.2588	1.24345	0.746857
YBR277C	YBR277C	36.8546	29.5025	1.2492	0.723998					YKR073C	YKR073C	36.0817	28.7483	1.25509	0.796562					YOR039W	YOR039W	38.5795	31.0312	1.24325	0.742839
YKL074C	YKL074C	33.7695	27.0334	1.24918	0.723556					YMR055C	YMR055C	35.8587	28.5725	1.25501	0.795071					YOL147C	YOL147C	35.2337	28.3418	1.24317	0.741339
YIL038C	YIL038C	35.4914	28.4124	1.24915	0.722981					YCR095C	YCR095C	34.8803	27.8006	1.25466	0.788377					YKR024C	YKR024C	38.5673	31.027	1.24302	0.738492
YGL136C	YGL136C	34.4903	27.6113	1.24914	0.722769					YOR301W	YOR301W	38.0373	30.3186	1.25459	0.787049					YML038C	YML038C	35.0644	28.2092	1.24301	0.738286
YHR121W	YHR121W	35.2791	28.2437	1.2491	0.721909					YIL038C	YIL038C	36.7424	29.2874	1.25455	0.786271					YGR072W	YGR072W	39.7025	31.9419	1.24296	0.737247
YIL032C	YIL032C	34.8565	27.9054	1.2491	0.721893					YMR312W	YMR312W	38.0089	30.2977	1.25452	0.785719					YJL129C	YJL129C	36.2613	29.1736	1.24295	0.737034
YHR100C	YHR100C	32.0974	25.7053	1.24867	0.71347					YBR009C	YBR009C	36.325	28.9572	1.25444	0.784291					YNL050C	YNL050C	35.1854	28.3095	1.24288	0.735791
YDR274C	YDR274C	33.7766	27.0502	1.24866	0.713265					YBL039C	YBL039C	40.2809	32.1137	1.25432	0.782049					YJL198W	YJL198W	36.6879	29.5227	1.2427	0.732273
YIL071C	YIL071C	33.1531	26.5523	1.2486	0.712012					YJL157C	YJL157C	32.9716	26.2887	1.25421	0.779957					YHR037W	YHR037W	37.3669	30.0718	1.24259	0.73009
YNL136W	YNL136W	32.7306	26.2145	1.24857	0.711491					YJL145W	YJL145W	37.2944	29.7377	1.25411	0.778068					YHR126C	YHR126C	36.4528	29.3384	1.24249	0.728207
YCR036W	YCR036W	35.785	28.6628	1.24848	0.709772					YOR039W	YOR039W	38.9904	31.092	1.25403	0.776591					YMR055C	YMR055C	35.9906	28.9695	1.24236	0.725675
YPL066W	YPL066W	35.9441	28.7906	1.24847	0.709423					YHR133C	YHR133C	36.3317	28.9723	1.25402	0.776256					YNL104C	YNL104C	35.37	28.4713	1.2423	0.72447
YJR025C	YJR025C	33.6917	26.9882	1.24839	0.70787					YCR086W	YCR086W	36.3903	29.0227	1.25386	0.773213					YDR250C	YDR250C	36.1386	29.0908	1.24227	0.723796
YBR286W	YBR286W	36.4667	29.2112	1.24838	0.70774					YLR402W	YLR402W	36.1389	28.8274	1.25363	0.768942					YIL125W	YIL125W	36.721	29.5666	1.24198	0.718158
YML128C	YML128C	35.8647	28.7291	1.24838	0.707672					YGL062W	YGL062W	35.4955	28.3152	1.25359	0.768145					YIL012W	YIL012W	38.0756	30.6625	1.24176	0.714012
YEL013W	YEL013W	31.8099	25.4827	1.24829	0.705962					YOL003C	YOL003C	36.8763	29.419	1.25349	0.766244					YKL031W	YKL031W	35.4496	28.5533	1.24152	0.709288
YMR075C-A	YMR075C-A	35.3556	28.324	1.24826	0.705279					YNL299W	YNL299W	37.8685	30.212	1.25342	0.765043					YHR015W	YHR015W	35.8584	28.8836	1.24148	0.708432
YLR436C	YLR436C	33.6959	26.9962	1.24817	0.703559					YOR222W	YOR222W	35.9705	28.7023	1.25323	0.761331					YJL179W	YJL179W	34.8742	28.0912	1.24146	0.708172
YBL103C	YBL103C	33.9452	27.1978	1.24809	0.70196					YIL057C	YIL057C	36.6803	29.2694	1.2532	0.760743					YPR188C	YPR188C	35.5674	28.65	1.24144	0.707783
YOR038C	YOR038C	36.7476	29.4444	1.24803	0.700806					YNL219C	YNL219C	37.3156	29.7767	1.25318	0.760488					YDR485C	YDR485C	36.9889	29.8005	1.24122	0.703412
YLR390W	YLR390W	32.414	25.9762	1.24784	0.696945					YNL090W	YNL090W	35.5557	28.3737	1.25312	0.759335					YJL095W	YJL095W	36.2838	29.2327	1.24121	0.703175
YML094W	YML094W	33.1295	26.5498	1.24782	0.696703					YPR049C	YPR049C	38.6	30.8032	1.25312	0.759228					YPL078C	YPL078C	40.6778	32.774	1.24116	0.702332
YNL198C	YNL198C	33.7914	27.0804	1.24782	0.696549					YNL023C	YNL023C	36.2519	28.9346	1.25289	0.754979					YDR505C	YDR505C	45.3283	36.5217	1.24113	0.701742
YGR112W	YGR112W	30.9657	24.8215	1.24753	0.690954					YHL014C	YHL014C	36.1132	28.824	1.25288	0.754845					YAR035W	YAR035W	35.9411	28.9599	1.24106	0.700375
YLR452C	YLR452C	37.9773	30.4435	1.24747	0.689677					YLR334C	YLR334C	36.7633	29.3431	1.25288	0.754712					YNL023C	YNL023C	36.078	29.0703	1.24106	0.700347
YHR001W-A	YHR001W-A	32.22	25.8288	1.24745	0.689202					YDR350C	YDR350C	35.8684	28.6301	1.25282	0.75363					YOL068C	YOL068C	36.3387	29.2823	1.24098	0.69869
YIL077C	YIL077C	33.7943	27.0919	1.24739	0.688188					YNL072W	YNL072W	36.6599	29.2623	1.2528	0.753325					YOR265W	YOR265W	36.753	29.6186	1.24088	0.696765
YJL212C	YJL212C	32.1935	25.8094	1.24736	0.687452					YPL165C	YPL165C	38.3371	30.6032	1.25271	0.751627					YPL106C	YPL106C	38.3608	30.9159	1.24081	0.695482
YKL139W	YKL139W	43.0985	34.5632	1.24695	0.679333					YNL050C	YNL050C	35.1413	28.0608	1.25233	0.7443					YIL077C	YIL077C	36.6093	29.5045	1.2408	0.695336
YML086C	YML086C	31.1281	24.9649	1.24688	0.677884					YJL095W	YJL095W	37.1648	29.6794	1.25221	0.742084					YGL215W	YGL215W	35.502	28.614	1.24072	0.693688
YLR024C	YLR024C	34.4472	27.6302	1.24672	0.674897					YER106W	YER106W	36.117	28.8427	1.2522	0.741971					YMR154C	YMR154C	34.8229	28.0672	1.2407	0.693315
YHR171W	YHR171W	33.3037	26.7184	1.24647	0.669901					YIL101C	YIL101C	35.9575	28.7158	1.25219	0.741629					YHL043W	YHL043W	36.0477	29.055	1.24067	0.69277
YCR025C	YCR025C	37.19	29.8383	1.24638	0.668156					YOR038C	YOR038C	38.3989	30.6661	1.25216	0.741164					YML028W	YML028W	37.4838	30.213	1.24065	0.692342
YOR197W	YOR197W	33.5746	26.9383	1.24635	0.667556					YOR144C	YOR144C	39.8651	31.837	1.25216	0.741159					YER093C-A	YER093C-A	34.8424	28.0841	1.24064	0.692234
YJL099W	YJL099W	34.3676	27.5747	1.24635	0.667407					YNL078W	YNL078W	37.1437	29.6639	1.25215	0.740993					YLR046C	YLR046C	37.1056	29.9118	1.2405	0.689471
YOR209C	YOR209C	33.7207	27.0589	1.2462	0.664413					YDR514C	YDR514C	34.7787	27.7759	1.25212	0.740385					YNL218W	YNL218W	35.5226	28.6363	1.24047	0.688926
YCL037C	YCL037C	38.0116	30.5101	1.24587	0.657978					YIL098C	YIL098C	35.8426	28.6268	1.25207	0.739404					YIL100W	YIL100W	34.7009	27.9749	1.24043	0.688008
YOR058C	YOR058C	36.1641	29.0297	1.24576	0.655834					YHR022C	YHR022C	34.9901	27.9503	1.25187	0.735672					YML021C	YML021C	36.2538	29.2288	1.24034	0.686384
YNR021W	YNR021W	32.4914	26.0825	1.24572	0.654931					YJR092W	YJR092W	36.648	29.2764	1.25179	0.734189					YIL071C	YIL071C	35.3508	28.5009	1.24034	0.686343
YIL122W	YIL122W	34.682	27.8429	1.24563	0.653234					YIL077C	YIL077C	36.4129	29.0895	1.25175	0.733442					YJL150W	YJL150W	35.4905	28.6141	1.24032	0.685853
YDR512C	YDR512C	30.2999	24.325	1.24562	0.653092					YLL007C	YLL007C	35.14	28.0743	1.25168	0.732084					YNL094W	YNL094W	34.7713	28.0347	1.2403	0.685478
YIL065C	YIL065C	33.9512	27.2565	1.24562	0.652985					YHR167W	YHR167W	39.5165	31.5724	1.25162	0.730865					YIL103W	YIL103W	36.591	29.5029	1.24025	0.684545
YPL178W	YPL178W	35.5322	28.5272	1.24555	0.651705					YNL211C	YNL211C	34.6788	27.7094	1.25152	0.728981					YHL008C	YHL008C	37.3165	30.0881	1.24024	0.684428
YBL039C	YBL039C	36.7317	29.4929	1.24544	0.64946					YBR194W	YBR194W	41.6123	33.2502	1.25149	0.728477					YMR104C	YMR104C	34.9039	28.1451	1.24014	0.682474
YMR037C	YMR037C	34.0499	27.3456	1.24517	0.64404					YHR161C	YHR161C	34.8519	27.8485	1.25148	0.728311					YDR257C	YDR257C	34.3164	27.672	1.24011	0.681916
YDR250C	YDR250C	33.9893	27.2975	1.24514	0.643552					YPR065W	YPR065W	36.8283	29.4301	1.25138	0.72642					YPL214C	YPL214C	37.0712	29.895	1.24005	0.680618
YMR105C	YMR105C	36.9383	29.6662	1.24513	0.643381					YDR363W	YDR363W	37.2477	29.7687	1.25124	0.72369					YDR319C	YDR319C	37.0452	29.8743	1.24003	0.680387
YEL015W	YEL015W	40.6886	32.6817	1.245	0.640647					YHR103W	YHR103W	35.3317	28.2377	1.25122	0.723429					YDR121W	YDR121W	37.2282	30.0297	1.23972	0.674193
YLR200W	YLR200W	44.4748	35.7229	1.24499	0.640618					YGL019W	YGL019W	36.3317	29.0386	1.25115	0.722131					YLR426W	YLR426W	36.7129	29.6144	1.2397	0.673836
YBR009C	YBR009C	34.8368	27.983	1.24493	0.639261					YBL010C	YBL010C	35.1233	28.0741	1.25109	0.720982					YHR075C	YHR075C	36.7284	29.6273	1.23968	0.673527
YLR025W	YLR025W	33.5356	26.9408	1.24479	0.636549					YDR198C	YDR198C	36.561	29.2256	1.25099	0.719005					YBR133C	YBR133C	47.0263	37.9408	1.23946	0.669281
YJR118C	YJR118C	33.0411	26.545	1.24472	0.635188					YER007W	YER007W	38.7565	30.9847	1.25083	0.715939					YGR111W	YGR111W	36.3193	29.3117	1.23907	0.661693
YJL068C	YJL068C	31.3987	25.226	1.2447	0.634767					YHR034C	YHR034C	36.9109	29.5118	1.25072	0.713826					YOR284W	YOR284W	36.2329	29.2421	1.23907	0.661592
YLR357W	YLR357W	39.8029	31.9826	1.24452	0.631135					YNL034W	YNL034W	35.3558	28.2717	1.25058	0.711169					YNR037C	YNR037C	35.1576	28.3751	1.23903	0.660854
YNL123W	YNL123W	33.4741	26.8981	1.24448	0.630398					YMR075C-A	YMR075C-A	36.9139	29.5179	1.25056	0.710822					YLR030W	YLR030W	33.8862	27.349	1.23903	0.660837
YPL091W	YPL091W	33.9404	27.2733	1.24445	0.629894					YHR126C	YHR126C	36.7498	29.3888	1.25047	0.70919					YCR008W	YCR008W	36.7494	29.6606	1.239	0.660262
YHR183W	YHR183W	33.1162	26.6129	1.24436	0.628136					YJL169W	YJL169W	36.7614	29.3993	1.25042	0.708173					YNL241C	YNL241C	36.6615	29.5898	1.23899	0.660107
YIL101C	YIL101C	33.8399	27.1946	1.24436	0.628048					YAL005C	YAL005C	34.8386	27.8629	1.25036	0.707055					YMR016C	YMR016C	39.2006	31.6409	1.23892	0.658743
YPR007C	YPR007C	35.0026	28.1306	1.24429	0.626661					YER035W	YER035W	37.9485	30.3519	1.25028	0.70563					YOR197W	YOR197W	36.1135	29.1505	1.23887	0.657677
YDR042C	YDR042C	33.7935	27.1618	1.24415	0.623968					YOL030W	YOL030W	36.8163	29.4501	1.25013	0.702669					YNL320W	YNL320W	34.7186	28.0257	1.23881	0.656658
YHR159W	YHR159W	33.3124	26.7761	1.24411	0.623083					YAL027W	YAL027W	34.9928	27.9917	1.25011	0.702438					YER124C	YER124C	35.7253	28.8389	1.23879	0.656186
YOL086C	YOL086C	39.1483	31.4673	1.24409	0.622783					YPL207W	YPL207W	36.849	29.478	1.25005	0.701251					YDR466W	YDR466W	37.0509	29.9089	1.23879	0.656172
YNL201C	YNL201C	34.8409	28.0073	1.24399	0.620702					YDR540C	YDR540C	36.0158	28.8118	1.25004	0.700973					YKL061W	YKL061W	37.0746	29.9285	1.23877	0.655853
YOL007C	YOL007C	34.1033	27.4152	1.24395	0.619984					YLR032W	YLR032W	38.3201	30.6562	1.24999	0.700161					YAL027W	YAL027W	34.7625	28.063	1.23873	0.654994
YBL021C	YBL021C	31.2585	25.1301	1.24387	0.618299					YAR035W	YAR035W	35.5622	28.4526	1.24987	0.697907					YLR182W	YLR182W	41.0101	33.1095	1.23862	0.652921
YPL144W	YPL144W	33.511	26.9445	1.24371	0.615081					YOR277C	YOR277C	36.1673	28.9372	1.24985	0.697522					YMR224C	YMR224C	37.329	30.1378	1.23861	0.652693
YNR030W	YNR030W	33.9903	27.331	1.24365	0.614067					YAL019W	YAL019W	35.5661	28.4599	1.24969	0.694466					YER088C	YER088C	36.2331	29.2545	1.23855	0.65146
YBR284W	YBR284W	36.5975	29.428	1.24363	0.613516					YCR026C	YCR026C	38.8132	31.0588	1.24967	0.694013					YBL094C	YBL094C	48.6894	39.313	1.23851	0.650736
YBR260C	YBR260C	33.7043	27.1027	1.24358	0.612491					YKL164C	YKL164C	37.6428	30.1248	1.24956	0.692009					YIL135C	YIL135C	36.9469	29.8319	1.2385	0.650645
YPL224C	YPL224C	33.0507	26.5785	1.24351	0.611291					YLR460C	YLR460C	35.4226	28.354	1.2493	0.686983					YNL211C	YNL211C	35.0047	28.2654	1.23843	0.64922
YML103C	YML103C	35.1226	28.2453	1.24348	0.610655					YHR032W	YHR032W	35.4096	28.3469	1.24915	0.68422					YKR042W	YKR042W	36.1607	29.2046	1.23819	0.644448
YHR094C	YHR094C	32.5822	26.2025	1.24348	0.610537					YGR063C	YGR063C	34.0058	27.2249	1.24907	0.682734					YLR460C	YLR460C	35.4934	28.6662	1.23816	0.644022
YNL032W	YNL032W	33.6615	27.0713	1.24344	0.609795					YNL056W	YNL056W	36.2364	29.0109	1.24906	0.682536					YKL139W	YKL139W	49.0685	39.6331	1.23807	0.642142
YNL219C	YNL219C	34.8444	28.0234	1.2434	0.609066					YJR083C	YJR083C	35.4202	28.3598	1.24896	0.680527					YJL145W	YJL145W	36.9732	29.8656	1.23799	0.640599
YOR231W	YOR231W	32.1907	25.8927	1.24323	0.605727					YMR105C	YMR105C	39.241	31.42	1.24892	0.679769					YBR221C	YBR221C	37.3137	30.1408	1.23798	0.640503
YIL008W	YIL008W	35.6542	28.6789	1.24322	0.605501					YHR015W	YHR015W	35.8153	28.6775	1.2489	0.679461					YHR041C	YHR041C	36.973	29.8655	1.23798	0.640503
YDL067C	YDL067C	31.7611	25.5475	1.24322	0.605349					YDR318W	YDR318W	38.4312	30.7744	1.2488	0.677665					YIL032C	YIL032C	37.293	30.1261	1.2379	0.638838
YJL137C	YJL137C	32.0536	25.7851	1.24311	0.603183					YBR065C	YBR065C	35.4624	28.3976	1.24878	0.677234					YHR146W	YHR146W	38.1871	30.8489	1.23788	0.638448
YNL264C	YNL264C	36.4738	29.3419	1.24306	0.602329					YPL262W	YPL262W	35.7504	28.6283	1.24878	0.677144					YGL023C	YGL023C	35.0825	28.3431	1.23778	0.636558
YHL014C	YHL014C	33.8291	27.216	1.24298	0.600748					YER061C	YER061C	35.4176	28.3621	1.24876	0.676909					YML128C	YML128C	38.1874	30.8558	1.23761	0.633226
YGL019W	YGL019W	34.5686	27.8135	1.24287	0.598557					YLR262C	YLR262C	37.2036	29.7932	1.24873	0.6762					YDR488C	YDR488C	34.5872	27.947	1.2376	0.633074
YPL106C	YPL106C	36.7038	29.5335	1.24279	0.596834					YGL087C	YGL087C	36.9292	29.5744	1.24869	0.675422					YNL219C	YNL219C	36.9157	29.8293	1.23757	0.632398
YKR096W	YKR096W	34.3956	27.6764	1.24277	0.596621					YGR111W	YGR111W	36.3147	29.0828	1.24867	0.675044					YNL069C	YNL069C	34.5414	27.9114	1.23754	0.631842
YDL125C	YDL125C	37.067	29.8266	1.24275	0.596089					YMR016C	YMR016C	39.442	31.5876	1.24866	0.674866					YMR060C	YMR060C	38.5248	31.1316	1.23748	0.630815
YKR035W-A	YKR035W-A	33.5835	27.0243	1.24271	0.595411					YIL112W	YIL112W	35.208	28.1985	1.24858	0.673376					YCR095C	YCR095C	34.1416	27.59	1.23746	0.630424
YAL027W	YAL027W	32.2915	25.985	1.2427	0.59511					YHR096C	YHR096C	35.0041	28.0365	1.24852	0.672251					YIL066C	YIL066C	37.0636	29.9515	1.23746	0.630275
YKR103W	YKR103W	32.774	26.375	1.24262	0.593466					YDL229W	YDL229W	37.3076	29.8825	1.24848	0.671469					YER155C	YER155C	43.7445	35.3507	1.23744	0.630051
YDR319C	YDR319C	34.16	27.4918	1.24255	0.592228					YOR161C	YOR161C	35.9991	28.8348	1.24846	0.671164					YCR026C	YCR026C	38.418	31.0471	1.23741	0.629398
YLR018C	YLR018C	36.5808	29.4419	1.24247	0.590611					YLR128W	YLR128W	37.5422	30.0718	1.24842	0.670379					YOR161C	YOR161C	35.481	28.6742	1.23739	0.628924
YLR176C	YLR176C	35.5646	28.6247	1.24244	0.590056					YDR247W	YDR247W	35.9875	28.8267	1.24841	0.670151					YJL120W	YJL120W	37.1475	30.023	1.2373	0.627283
YNL069C	YNL069C	31.8193	25.6119	1.24236	0.588425					YHR140W	YHR140W	35.7952	28.6729	1.2484	0.669929					YKR010C	YKR010C	35.7924	28.9291	1.23725	0.626218
YDL142C	YDL142C	31.9098	25.6851	1.24235	0.58814					YOR246C	YOR246C	35.9323	28.783	1.24839	0.669779					YCL001W-A	YCL001W-A	37.5898	30.3842	1.23715	0.62429
YHR075C	YHR075C	33.9218	27.3055	1.24231	0.587365					YHL043W	YHL043W	36.3131	29.0914	1.24824	0.667034					YKL075C	YKL075C	36.817	29.76	1.23713	0.623948
YCR008W	YCR008W	34.9124	28.1052	1.2422	0.585289					YIL125W	YIL125W	36.6534	29.3648	1.24821	0.666434					YKR035W-A	YKR035W-A	35.8782	29.0015	1.23711	0.623648
YHR204W	YHR204W	36.1139	29.0735	1.24216	0.584428					YHR171W	YHR171W	35.0951	28.1167	1.2482	0.66616					YKL053W	YKL053W	38.7681	31.3392	1.23705	0.622344
YML013C-A	YML013C-A	35.2744	28.3992	1.24209	0.583094					YMR154C	YMR154C	34.0138	27.2507	1.24818	0.665865					YNL264C	YNL264C	38.3141	30.9846	1.23655	0.612739
YJL120W	YJL120W	35.0157	28.1911	1.24208	0.582953					YGL115W	YGL115W	37.4178	29.9797	1.24811	0.664439					YMR295C	YMR295C	35.7958	28.9488	1.23652	0.612083
YHR167W	YHR167W	37.7148	30.3643	1.24208	0.582789					YBL015W	YBL015W	35.0738	28.1039	1.248	0.662528					YER116C	YER116C	38.038	30.7655	1.23639	0.609515
YHR031C	YHR031C	44.0245	35.4447	1.24206	0.582532					YHR031C	YHR031C	46.9815	37.6505	1.24783	0.65925					YOR047C	YOR047C	35.6997	28.8754	1.23634	0.608515
YFR038W	YFR038W	32.891	26.4814	1.24204	0.582143					YLR144C	YLR144C	37.519	30.0676	1.24782	0.659103					YLR358C	YLR358C	48.2393	39.0214	1.23623	0.606411
YLR128W	YLR128W	35.7466	28.7809	1.24203	0.581786					YIL032C	YIL032C	36.5854	29.3205	1.24778	0.658255					YLR027C	YLR027C	37.4696	30.3102	1.2362	0.60595
YMR007W	YMR007W	32.1296	25.8688	1.24202	0.581753					YER093C-A	YER093C-A	35.5459	28.4882	1.24774	0.657497					YOR043W	YOR043W	37.1958	30.0889	1.2362	0.605834
YIL135C	YIL135C	34.6843	27.9262	1.242	0.581212					YJL068C	YJL068C	34.0875	27.3202	1.2477	0.656836					YOR023C	YOR023C	37.5578	30.3823	1.23617	0.605363
YDR121W	YDR121W	36.241	29.1804	1.24196	0.580518					YIL055C	YIL055C	36.2328	29.0397	1.2477	0.656742					YIL128W	YIL128W	35.509	28.7288	1.23601	0.602094
YOR233W	YOR233W	32.611	26.2581	1.24194	0.580123					YHR044C	YHR044C	34.6364	27.7609	1.24767	0.656198					YGR085C	YGR085C	37.0524	29.9784	1.23597	0.601395
YIL103W	YIL103W	35.0187	28.2001	1.24179	0.577142					YJL038C	YJL038C	36.043	28.8895	1.24762	0.655165					YBR278W	YBR278W	39.0766	31.6178	1.2359	0.600071
YAL005C	YAL005C	31.0428	24.9994	1.24174	0.576112					YBR212W	YBR212W	35.6918	28.6081	1.24761	0.655104					YMR063W	YMR063W	35.2819	28.5484	1.23586	0.599297
YPL060W	YPL060W	34.4955	27.7802	1.24173	0.575902					YJL122W	YJL122W	34.9182	27.9898	1.24753	0.653621					YHL017W	YHL017W	35.7141	28.8985	1.23585	0.599032
YGL215W	YGL215W	33.495	26.9774	1.24159	0.573241					YPL101W	YPL101W	37.9079	30.3873	1.24749	0.652822					YNL303W	YNL303W	35.1076	28.4081	1.23583	0.598682
YOR216C	YOR216C	33.8266	27.2456	1.24155	0.572272					YGR210C	YGR210C	35.5922	28.5326	1.24742	0.651499					YDL025C	YDL025C	35.3935	28.6395	1.23583	0.598633
YDR259C	YDR259C	35.0315	28.2176	1.24147	0.570859					YMR075W	YMR075W	37.4157	29.9978	1.24728	0.648849					YGR106C	YGR106C	34.5915	27.9916	1.23578	0.597701
YJL144W	YJL144W	35.0142	28.2042	1.24146	0.570484					YOR043W	YOR043W	37.1041	29.7483	1.24727	0.64861					YDL214C	YDL214C	36.5967	29.6151	1.23574	0.597016
YER097W	YER097W	32.051	25.8196	1.24134	0.568233					YIL135C	YIL135C	37.333	29.9329	1.24722	0.647767					YIL114C	YIL114C	33.8762	27.4151	1.23567	0.595637
YBL047C	YBL047C	36.693	29.5614	1.24125	0.566377					YBL094C	YBL094C	50.8796	40.802	1.24699	0.643315					YHR167W	YHR167W	39.9329	32.3172	1.23565	0.595243
YOL025W	YOL025W	34.2899	27.6261	1.24121	0.565679					YDL125C	YDL125C	38.1612	30.6034	1.24696	0.642714					YDL241W	YDL241W	35.9965	29.1323	1.23562	0.594608
YNL259C	YNL259C	33.2111	26.7582	1.24116	0.564533					YDR515W	YDR515W	35.991	28.865	1.24687	0.641154					YLL010C	YLL010C	37.5008	30.3519	1.23554	0.592943
YML106W	YML106W	33.3488	26.8728	1.24098	0.561141					YMR190C	YMR190C	35.7417	28.6662	1.24682	0.640214					YLL045C	YLL045C	35.3815	28.6375	1.2355	0.592171
YOR147W	YOR147W	32.4035	26.1121	1.24094	0.560209					YLR427W	YLR427W	39.2208	31.4579	1.24677	0.639193					YDL035C	YDL035C	36.6556	29.6701	1.23544	0.591094
YIL093C	YIL093C	29.518	23.789	1.24083	0.558046					YML008C	YML008C	36.985	29.6667	1.24668	0.637536					YDR179C	YDR179C	35.3955	28.654	1.23527	0.587867
YDL078C	YDL078C	33.7229	27.1778	1.24082	0.557978					YCR087W	YCR087W	38.3352	30.7501	1.24667	0.637247					YBL010C	YBL010C	34.7487	28.1309	1.23525	0.587406
YDR514C	YDR514C	32.8976	26.5128	1.24082	0.557901					YDL025C	YDL025C	35.0881	28.146	1.24664	0.636795					YCL037C	YCL037C	40.1584	32.5152	1.23507	0.583835
YDR083W	YDR083W	32.9388	26.549	1.24068	0.555095					YOR265W	YOR265W	36.7112	29.4489	1.24661	0.636128					YIL105C	YIL105C	36.6653	29.69	1.23494	0.581299
YDR467C	YDR467C	34.0905	27.4783	1.24063	0.554213					YPL060W	YPL060W	36.6328	29.3887	1.24649	0.633953					YMR048W	YMR048W	35.666	28.8827	1.23486	0.579763
YHL035C	YHL035C	32.5813	26.2636	1.24055	0.552488					YOR193W	YOR193W	39.0119	31.2976	1.24648	0.633713					YCR025C	YCR025C	38.8499	31.4622	1.23481	0.578884
YGR106C	YGR106C	31.9295	25.741	1.24041	0.549789					YLR390W	YLR390W	34.8973	27.9968	1.24647	0.633592					YNL032W	YNL032W	35.019	28.3619	1.23472	0.577163
YOR175C	YOR175C	36.8062	29.6737	1.24036	0.548834					YIL044C	YIL044C	35.657	28.6066	1.24646	0.633335					YDR198C	YDR198C	36.6461	29.6804	1.23469	0.576505
YKL071W	YKL071W	34.5363	27.8439	1.24035	0.548601					YLR233C	YLR233C	48.4161	38.8448	1.2464	0.632137					YER097W	YER097W	33.8001	27.3766	1.23464	0.575462
YOR008C-A	YOR008C-A	33.2306	26.7923	1.24031	0.547685					YMR060C	YMR060C	38.1311	30.5943	1.24634	0.631136					YGR170W	YGR170W	34.9099	28.2757	1.23463	0.575261
YOR243C	YOR243C	34.7627	28.0284	1.24027	0.546955					YDR379W	YDR379W	36.005	28.8887	1.24634	0.631001					YIR033W	YIR033W	36.2837	29.3894	1.23459	0.574527
YKR101W	YKR101W	33.8971	27.3353	1.24005	0.542634					YJL179W	YJL179W	34.7253	27.8624	1.24631	0.630511					YHR033W	YHR033W	37.5328	30.4017	1.23456	0.574028
YPR164W	YPR164W	35.6543	28.7557	1.2399	0.539692					YKR097W	YKR097W	35.4691	28.4613	1.24622	0.628859					YLL032C	YLL032C	37.359	30.2629	1.23448	0.572451
YBR272C	YBR272C	33.0275	26.6374	1.23989	0.539515					YKL076C	YKL076C	36.3394	29.1596	1.24622	0.62885					YGL181W	YGL181W	35.2671	28.5692	1.23445	0.571786
YBL059W	YBL059W	33.0366	26.6455	1.23986	0.538817					YHL041W	YHL041W	35.5064	28.492	1.24619	0.628164					YLR390W	YLR390W	35.2387	28.5468	1.23442	0.571265
YBL095W	YBL095W	31.5011	25.4071	1.23985	0.53869					YMR100W	YMR100W	35.3389	28.3618	1.24601	0.62474					YDR309C	YDR309C	36.1732	29.3057	1.23434	0.569672
YJR082C	YJR082C	34.1719	27.5618	1.23983	0.5383					YGR135W	YGR135W	35.6064	28.5776	1.24595	0.623745					YDL088C	YDL088C	35.3782	28.6624	1.23431	0.569123
YKL134C	YKL134C	34.3977	27.7446	1.2398	0.537647					YDR250C	YDR250C	35.7204	28.6696	1.24593	0.623331					YMR205C	YMR205C	39.9772	32.389	1.23428	0.568579
YHR093W	YHR093W	33.2903	26.855	1.23963	0.534312					YML047C	YML047C	35.4391	28.4442	1.24592	0.623081					YBR172C	YBR172C	43.9732	35.6274	1.23425	0.56799
YML021C	YML021C	34.4166	27.7645	1.23959	0.533479					YKR091W	YKR091W	35.1063	28.1789	1.24584	0.621504					YIL123W	YIL123W	35.4848	28.7504	1.23424	0.567725
YBR133C	YBR133C	41.4053	33.4035	1.23955	0.532735					YDR488C	YDR488C	33.9364	27.243	1.24569	0.618743					YBL071C	YBL071C	36.8997	29.9004	1.23409	0.564804
YPR120C	YPR120C	34.9937	28.2316	1.23952	0.532184					YKL031W	YKL031W	35.6952	28.6577	1.24557	0.616473					YPL072W	YPL072W	37.356	30.2703	1.23408	0.564634
YLR427W	YLR427W	36.3918	29.3601	1.2395	0.53175					YJL144W	YJL144W	36.8028	29.5481	1.24552	0.615594					YOR251C	YOR251C	36.6142	29.6701	1.23404	0.563964
YEL053C	YEL053C	33.2693	26.8415	1.23947	0.531162					YDR541C	YDR541C	35.6989	28.6628	1.24548	0.614758					YCR087W	YCR087W	38.5458	31.2366	1.23399	0.562982
YEL060C	YEL060C	32.0607	25.8676	1.23942	0.530123					YOR225W	YOR225W	36.3403	29.1786	1.24544	0.614085					YGR210C	YGR210C	35.5126	28.7788	1.23398	0.562799
YDL122W	YDL122W	32.6133	26.3145	1.23937	0.529078					YBL013W	YBL013W	35.6361	28.6143	1.2454	0.613209					YPR120C	YPR120C	38.8705	31.5	1.23398	0.56276
YOR246C	YOR246C	33.1776	26.77	1.23936	0.528906					YBR278W	YBR278W	39.2037	31.4829	1.24524	0.610233					YFL063W	YFL063W	34.0599	27.602	1.23396	0.562375
YDL069C	YDL069C	31.4476	25.3754	1.23929	0.527621					YNL091W	YNL091W	34.5203	27.7231	1.24518	0.60915					YDR042C	YDR042C	36.5265	29.6037	1.23385	0.56017
YHR067W	YHR067W	32.1902	25.9753	1.23926	0.527026					YNL321W	YNL321W	35.6185	28.6063	1.24513	0.608127					YJL063C	YJL063C	36.046	29.2146	1.23383	0.559855
YIL113W	YIL113W	32.2681	26.0452	1.23893	0.520436					YGR061C	YGR061C	36.1104	29.0018	1.24511	0.607774					YHR140W	YHR140W	35.0239	28.3867	1.23382	0.559521
YDR488C	YDR488C	32.3692	26.1268	1.23893	0.520393					YNL086W	YNL086W	36.4685	29.2897	1.2451	0.607514					YAL046C	YAL046C	35.6949	28.9307	1.23381	0.559385
YHR022C	YHR022C	32.9731	26.6167	1.23881	0.518101					YDR173C	YDR173C	41.3658	33.2289	1.24487	0.603272					YHL041W	YHL041W	35.6284	28.8777	1.23377	0.558625
YNL023C	YNL023C	33.8755	27.3474	1.23871	0.516039					YAL015C	YAL015C	36.5014	29.3217	1.24486	0.603028					YEL046C	YEL046C	38.4152	31.1377	1.23372	0.557612
YER090W	YER090W	33.203	26.8046	1.2387	0.515924					YPL009C	YPL009C	37.4099	30.0524	1.24482	0.602309					YMR176W	YMR176W	35.5225	28.7949	1.23364	0.556105
YPL032C	YPL032C	34.3306	27.7161	1.23865	0.514857					YNL022C	YNL022C	36.1199	29.0181	1.24473	0.600652					YGR007W	YGR007W	37.7257	30.5819	1.23359	0.555231
YMR133W	YMR133W	31.7816	25.6589	1.23862	0.514251					YPL241C	YPL241C	38.6676	31.0672	1.24465	0.599001					YHR096C	YHR096C	34.5787	28.032	1.23354	0.554225
YMR121C	YMR121C	33.0454	26.6814	1.23852	0.512231					YHR035W	YHR035W	36.2305	29.1127	1.24449	0.596068					YIL044C	YIL044C	35.3569	28.6636	1.23351	0.553643
YOR264W	YOR264W	34.6618	27.9872	1.23849	0.51172					YNL289W	YNL289W	36.1842	29.0809	1.24426	0.591643					YGR181W	YGR181W	36.7317	29.781	1.2334	0.551348
YDR198C	YDR198C	35.1269	28.3628	1.23849	0.511633					YDR248C	YDR248C	36.2793	29.1608	1.24411	0.588843					YDR538W	YDR538W	35.3628	28.6711	1.23339	0.55131
YDL056W	YDL056W	34.8473	28.1373	1.23847	0.511362					YML013W	YML013W	36.2097	29.1055	1.24408	0.588381					YHR093W	YHR093W	35.8551	29.071	1.23336	0.550736
YPL055C	YPL055C	36.0165	29.0835	1.23838	0.509624					YNL184C	YNL184C	34.2011	27.4918	1.24405	0.587638					YHL003C	YHL003C	36.6182	29.6898	1.23336	0.550642
YPL048W	YPL048W	33.9526	27.4171	1.23837	0.509357					YBR133C	YBR133C	46.9349	37.7296	1.24398	0.586439					YJL208C	YJL208C	36.3906	29.5056	1.23334	0.550333
YIL161W	YIL161W	35.4986	28.6658	1.23836	0.509141					YJL212C	YJL212C	33.7167	27.1054	1.24391	0.585093					YCR063W	YCR063W	40.4733	32.8193	1.23322	0.547883
YLR451W	YLR451W	34.8711	28.1616	1.23825	0.506922					YPR007C	YPR007C	37.8853	30.4579	1.24386	0.584125					YDL125C	YDL125C	38.5214	31.2368	1.23321	0.547665
YKL109W	YKL109W	30.8043	24.8793	1.23815	0.504956					YCR008W	YCR008W	37.0228	29.7649	1.24384	0.583737					YNL031C	YNL031C	35.7787	29.0148	1.23312	0.546032
YHR129C	YHR129C	33.4021	26.9776	1.23814	0.50476					YDR344C	YDR344C	35.8017	28.7865	1.2437	0.58107					YCR077C	YCR077C	36.8983	29.9236	1.23308	0.545281
YCR095C	YCR095C	32.6017	26.3325	1.23808	0.503569					YMR063W	YMR063W	34.5606	27.7904	1.24362	0.57951					YLL056C	YLL056C	36.1305	29.3051	1.23291	0.541847
YOR360C	YOR360C	35.7934	28.9117	1.23803	0.502508					YDL035C	YDL035C	36.6281	29.4546	1.24354	0.578108					YJR036C	YJR036C	37.014	30.0237	1.23283	0.540326
YMR153C-A	YMR153C-A	33.986	27.4525	1.23799	0.501868					YNR025C	YNR025C	36.2563	29.1561	1.24352	0.577741					YHR103W	YHR103W	35.0742	28.4507	1.23281	0.539914
YNL087W	YNL087W	33.5347	27.0882	1.23798	0.501645					YIL012W	YIL012W	36.8171	29.6072	1.24352	0.577711					YPR023C	YPR023C	37.2097	30.1838	1.23277	0.539251
YJL198W	YJL198W	34.7875	28.1003	1.23798	0.501585					YHR191C	YHR191C	43.3196	34.8365	1.24351	0.577518					YHR133C	YHR133C	36.1219	29.302	1.23274	0.538657
YLR019W	YLR019W	33.439	27.013	1.23789	0.49973					YEL014C	YEL014C	36.1343	29.06	1.24344	0.57616					YCR027C	YCR027C	40.2942	32.687	1.23273	0.538401
YLL027W	YLL027W	33.6539	27.1867	1.23788	0.499635					YCR068W	YCR068W	39.6634	31.8998	1.24338	0.574974					YHR032W	YHR032W	35.3405	28.6691	1.2327	0.537914
YGR061C	YGR061C	33.3041	26.9047	1.23786	0.499137					YBR274W	YBR274W	34.5373	27.7789	1.24329	0.573344					YHR078W	YHR078W	35.9775	29.1892	1.23256	0.535192
YBR172C	YBR172C	40.5613	32.7675	1.23785	0.49909					YNL104C	YNL104C	35.0702	28.212	1.2431	0.569705					YDR069C	YDR069C	36.797	29.8546	1.23254	0.534716
YBL006C	YBL006C	39.6854	32.06	1.23785	0.498949					YLR052W	YLR052W	36.7861	29.5929	1.24307	0.569216					YDL051W	YDL051W	36.0221	29.2269	1.2325	0.533944
YDR541C	YDR541C	33.2103	26.8299	1.23781	0.498241					YDR485C	YDR485C	35.3107	28.4063	1.24306	0.569033					YNR019W	YNR019W	36.5391	29.6465	1.23249	0.533849
YJL141C	YJL141C	31.721	25.6271	1.23779	0.497876					YHR041C	YHR041C	37.8114	30.4181	1.24305	0.568869					YNR068C	YNR068C	35.3738	28.7028	1.23242	0.532368
YNR050C	YNR050C	34.9344	28.2233	1.23778	0.497732					YLR030W	YLR030W	34.1718	27.491	1.24302	0.568198					YOR288C	YOR288C	34.6335	28.1025	1.2324	0.532021
YOR213C	YOR213C	34.4772	27.8542	1.23777	0.497534					YGL035C	YGL035C	34.9718	28.1361	1.24295	0.566898					YJR043C	YJR043C	39.9538	32.4198	1.23239	0.531828
YOR248W	YOR248W	33.0506	26.702	1.23776	0.497183					YGL081W	YGL081W	35.7876	28.7949	1.24285	0.564938					YNL095C	YNL095C	35.9661	29.1858	1.23231	0.530328
YAL068C	YAL068C	33.5967	27.1433	1.23775	0.497048					YNR067C	YNR067C	35.4714	28.5425	1.24276	0.563277					YLR449W	YLR449W	35.4904	28.8017	1.23223	0.528754
YGL234W	YGL234W	34.5388	27.9054	1.23771	0.49624					YCR036W	YCR036W	37.9909	30.5713	1.2427	0.56213					YLR418C	YLR418C	38.8887	31.5616	1.23215	0.527202
YAL046C	YAL046C	33.0777	26.7249	1.23771	0.496194					YBL064C	YBL064C	38.1247	30.6801	1.24265	0.561308					YBR284W	YBR284W	38.3894	31.1572	1.23212	0.526519
YPL009C	YPL009C	35.1301	28.3843	1.23766	0.495225					YIL064W	YIL064W	37.4355	30.1255	1.24265	0.561252					YOR221C	YOR221C	36.0083	29.2266	1.23204	0.52502
YNR020C	YNR020C	31.0892	25.1197	1.23764	0.49492					YHR116W	YHR116W	34.4264	27.7047	1.24262	0.56064					YIL161W	YIL161W	37.7188	30.6163	1.23198	0.523914
YGL252C	YGL252C	34.2391	27.6666	1.23756	0.493282					YEL072W	YEL072W	36.0727	29.0302	1.24259	0.560172					YOR196C	YOR196C	35.288	28.6466	1.23184	0.52111
YOR097C	YOR097C	34.0863	27.5431	1.23756	0.493261					YJL150W	YJL150W	35.576	28.6313	1.24255	0.559435					YBR115C	YBR115C	36.8995	29.9564	1.23178	0.519895
YKL061W	YKL061W	34.6699	28.0149	1.23755	0.493068					YKR024C	YKR024C	40.4581	32.5605	1.24255	0.559378					YPL183C	YPL183C	38.0025	30.8525	1.23175	0.519289
YJL123C	YJL123C	38.0781	30.7724	1.23741	0.490303					YDL241W	YDL241W	35.5899	28.643	1.24253	0.559005					YDR363W	YDR363W	36.4521	29.5967	1.23163	0.516982
YHL041W	YHL041W	33.1551	26.7942	1.2374	0.490069					YJL155C	YJL155C	33.6698	27.0977	1.24253	0.558979					YDR515W	YDR515W	36.1972	29.391	1.23157	0.51592
YIR021W	YIR021W	30.9209	24.9895	1.23735	0.489209					YER055C	YER055C	35.7253	28.752	1.24253	0.558978					YGR162W	YGR162W	36.6587	29.7668	1.23153	0.515066
YGL181W	YGL181W	35.0626	28.3371	1.23734	0.488855					YEL015W	YEL015W	43.3499	34.8895	1.24249	0.558267					YMR174C	YMR174C	36.882	29.949	1.23149	0.514349
YJL160C	YJL160C	32.2677	26.0788	1.23732	0.488459					YHR037W	YHR037W	37.6425	30.2961	1.24249	0.558184					YBR009C	YBR009C	35.8747	29.1312	1.23149	0.514252
YOR247W	YOR247W	34.9092	28.2138	1.23731	0.488336					YIL105C	YIL105C	36.503	29.3843	1.24226	0.553908					YMR127C	YMR127C	36.3499	29.5205	1.23134	0.511463
YJL208C	YJL208C	34.3488	27.7609	1.23731	0.488247					YDR505C	YDR505C	43.1684	34.7499	1.24226	0.553841					YGR284C	YGR284C	36.5801	29.7095	1.23126	0.509849
YBL048W	YBL048W	34.3303	27.7465	1.23728	0.487818					YIL161W	YIL161W	37.3036	30.0297	1.24222	0.553181					YHL034C	YHL034C	35.9647	29.2104	1.23123	0.50924
YJL157C	YJL157C	29.7352	24.0327	1.23728	0.487789					YOR292C	YOR292C	35.7077	28.7487	1.24206	0.550155					YDL222C	YDL222C	35.6884	28.9883	1.23113	0.507358
YPL188W	YPL188W	33.4448	27.0311	1.23727	0.487571					YOR073W	YOR073W	35.4135	28.5146	1.24194	0.547825					YHR129C	YHR129C	35.7453	29.0361	1.23106	0.506021
YLR439W	YLR439W	32.2895	26.0974	1.23727	0.487486					YIR020C	YIR020C	36.9117	29.7212	1.24193	0.54765					YLR128W	YLR128W	36.8839	29.9615	1.23104	0.505652
YOR201C	YOR201C	34.7577	28.0925	1.23726	0.48732					YJL172W	YJL172W	35.457	28.5502	1.24192	0.54743					YGR122W	YGR122W	35.3604	28.7268	1.23092	0.50328
YHL002W	YHL002W	33.1178	26.7677	1.23723	0.486724					YDR389W	YDR389W	37.9209	30.5355	1.24186	0.546377					YDR318W	YDR318W	38.0224	30.89	1.2309	0.502797
YHR111W	YHR111W	35.2169	28.4653	1.23719	0.485904					YGR072W	YGR072W	39.0903	31.4786	1.24181	0.545281					YHR094C	YHR094C	35.2887	28.6702	1.23085	0.501819
YJL078C	YJL078C	34.5348	27.9146	1.23716	0.485311					YHR146W	YHR146W	37.7462	30.3982	1.24173	0.543739					YER096W	YER096W	36.1597	29.3791	1.2308	0.500839
YNL085W	YNL085W	34.4425	27.8413	1.2371	0.484153					YHR181W	YHR181W	33.8631	27.2716	1.2417	0.543253					YHL007C	YHL007C	34.2946	27.8694	1.23055	0.496011
YJR036C	YJR036C	34.3197	27.7434	1.23704	0.483042					YDL177C	YDL177C	36.2761	29.2165	1.24163	0.541903					YNL072W	YNL072W	36.1229	29.3556	1.23053	0.495681
YAL015C	YAL015C	33.3818	26.9856	1.23702	0.482625					YJL178C	YJL178C	36.778	29.6228	1.24154	0.540325					YEL041W	YEL041W	35.8887	29.1683	1.2304	0.493104
YHR116W	YHR116W	32.3055	26.1183	1.23689	0.480039					YER048C	YER048C	37.4308	30.1487	1.24154	0.540201					YLR018C	YLR018C	39.8654	32.4013	1.23036	0.492446
YDL051W	YDL051W	33.8394	27.3588	1.23688	0.479737					YIR020W-B	YIR020W-B	36.1143	29.0902	1.24146	0.538705					YNL056W	YNL056W	35.8633	29.1511	1.23025	0.490286
YPR141C	YPR141C	38.5705	31.185	1.23683	0.478778					YIL108W	YIL108W	34.4698	27.7667	1.24141	0.537733					YBL013W	YBL013W	35.4038	28.7784	1.23022	0.489649
YIL014W	YIL014W	31.8564	25.7568	1.23682	0.478594					YNR068C	YNR068C	35.2754	28.4161	1.24139	0.537344					YJR025C	YJR025C	36.0436	29.2995	1.23018	0.48883
YPL183W-A	YPL183W-A	30.834	24.9316	1.23674	0.477073					YEL016C	YEL016C	36.7032	29.5672	1.24135	0.536604					YOR082C	YOR082C	33.6939	27.3901	1.23015	0.488246
YMR295C	YMR295C	33.7465	27.287	1.23672	0.4767					YDR465C	YDR465C	35.4615	28.5683	1.24129	0.535534					YOR360C	YOR360C	37.7531	30.6901	1.23014	0.488081
YDL156W	YDL156W	33.1944	26.8407	1.23672	0.476592					YNL229C	YNL229C	42.7304	34.4248	1.24127	0.535076					YPL048W	YPL048W	35.5942	28.9353	1.23013	0.487861
YBL045C	YBL045C	32.181	26.0228	1.23665	0.475204					YGR106C	YGR106C	34.6556	27.9197	1.24126	0.534895					YLR251W	YLR251W	38.1747	31.0336	1.23011	0.487471
YFR044C	YFR044C	33.2279	26.8697	1.23663	0.474865					YFR048W	YFR048W	35.935	28.9515	1.24122	0.534131					YNL086W	YNL086W	36.8562	29.9619	1.2301	0.487328
YJR121W	YJR121W	30.9868	25.0576	1.23662	0.474702					YPR141C	YPR141C	39.2285	31.6073	1.24112	0.532345					YIR020C	YIR020C	37.5194	30.5015	1.23009	0.487014
YER095W	YER095W	33.1012	26.7677	1.23661	0.474435					YKL138C	YKL138C	35.0414	28.2358	1.24103	0.530534					YHR183W	YHR183W	35.7806	29.0879	1.23008	0.487005
YGR101W	YGR101W	33.142	26.801	1.23659	0.474141					YNL144C	YNL144C	36.9654	29.7872	1.24098	0.529628					YDL122W	YDL122W	34.5284	28.0702	1.23007	0.486768
YNL274C	YNL274C	32.6303	26.3914	1.2364	0.470203					YHL025W	YHL025W	38.7952	31.263	1.24093	0.528694					YIR025W	YIR025W	36.9598	30.0473	1.23005	0.486365
YPL214C	YPL214C	34.9384	28.2591	1.23636	0.469498					YDL001W	YDL001W	37.7904	30.4546	1.24087	0.527647					YAL019W	YAL019W	35.428	28.8024	1.23004	0.486052
YBR158W	YBR158W	35.5772	28.7767	1.23632	0.468663					YLR449W	YLR449W	35.4953	28.607	1.24079	0.526018					YHL038C	YHL038C	34.8882	28.3638	1.23003	0.485919
YPL031C	YPL031C	32.4049	26.2115	1.23629	0.468017					YNL020C	YNL020C	34.1518	27.5243	1.24079	0.525987					YNR010W	YNR010W	42.4707	34.5291	1.23	0.485323
YGR239C	YGR239C	32.2684	26.1018	1.23625	0.46731					YER091C	YER091C	36.7518	29.6214	1.24072	0.524634					YJL178C	YJL178C	36.7789	29.9028	1.22995	0.48433
YMR077C	YMR077C	33.9109	27.4322	1.23617	0.465779					YCR065W	YCR065W	36.4885	29.4137	1.24053	0.521083					YNL289W	YNL289W	35.8285	29.1311	1.2299	0.483462
YEL016C	YEL016C	33.872	27.4008	1.23617	0.465689					YIL096C	YIL096C	34.7182	27.9869	1.24052	0.520868					YBR065C	YBR065C	35.3098	28.711	1.22983	0.482145
YDR515W	YDR515W	33.656	27.2267	1.23614	0.465064					YGR155W	YGR155W	35.2345	28.4041	1.24047	0.520051					YIL122W	YIL122W	36.1903	29.4276	1.22981	0.481595
YDR363W	YDR363W	33.6915	27.257	1.23607	0.463706					YNL160W	YNL160W	34.9965	28.2152	1.24034	0.517524					YGR059W	YGR059W	35.5596	28.9154	1.22978	0.481107
YNL072W	YNL072W	34.2216	27.6861	1.23606	0.463517					YDL190C	YDL190C	36.4121	29.3568	1.24033	0.517364					YNR061C	YNR061C	34.9484	28.4192	1.22974	0.480391
YOR180C	YOR180C	34.5201	27.9277	1.23605	0.463399					YBR281C	YBR281C	39.3204	31.7022	1.24031	0.516915					YAR018C	YAR018C	37.5277	30.5176	1.22971	0.479649
YKL006W	YKL006W	35.32	28.5752	1.23604	0.463084					YGL136C	YGL136C	37.5491	30.2743	1.2403	0.51672					YJL218W	YJL218W	34.9397	28.4139	1.22967	0.479
YGR117C	YGR117C	32.0931	25.9673	1.2359	0.460434					YMR176W	YMR176W	35.135	28.3294	1.24023	0.515528					YKR098C	YKR098C	35.3395	28.7391	1.22967	0.478893
YHL009C	YHL009C	33.2245	26.883	1.23589	0.460234					YNR061C	YNR061C	34.9769	28.2025	1.24021	0.515004					YLR438W	YLR438W	35.9689	29.2517	1.22963	0.47826
YMR054W	YMR054W	32.2155	26.0668	1.23588	0.460004					YKL006W	YKL006W	37.0483	29.875	1.24011	0.513207					YMR133W	YMR133W	34.4975	28.0565	1.22957	0.477032
YLL007C	YLL007C	32.1538	26.0183	1.23582	0.458724					YPL136W	YPL136W	35.2734	28.4446	1.24007	0.512497					YJL122W	YJL122W	35.1328	28.5744	1.22952	0.476095
YNL090W	YNL090W	33.6368	27.2185	1.23581	0.458578					YIL014W	YIL014W	34.4712	27.7978	1.24007	0.512431					YHR191C	YHR191C	42.2778	34.3865	1.22949	0.475442
YMR176W	YMR176W	31.8725	25.7915	1.23578	0.457951					YDR202C	YDR202C	35.3405	28.5006	1.23999	0.510906					YHR115C	YHR115C	36.4711	29.664	1.22947	0.475077
YPL246C	YPL246C	33.3111	26.9557	1.23577	0.457849					YOR196C	YOR196C	34.2559	27.6263	1.23998	0.510652					YHR162W	YHR162W	34.2451	27.8537	1.22946	0.474956
YGR071C	YGR071C	32.0358	25.9238	1.23577	0.457773					YHR111W	YHR111W	38.5869	31.1208	1.23991	0.50934					YPL067C	YPL067C	37.3932	30.4155	1.22941	0.473942
YDL068W	YDL068W	31.6821	25.6381	1.23574	0.45725					YHR117W	YHR117W	35.0469	28.2665	1.23987	0.508713					YJR091C	YJR091C	34.1949	27.8143	1.2294	0.473699
YJR004C	YJR004C	31.2232	25.2673	1.23572	0.456738					YKR085C	YKR085C	35.2324	28.4177	1.23981	0.507421					YPL236C	YPL236C	36.8548	29.978	1.2294	0.473628
YOL068C	YOL068C	33.201	26.868	1.23571	0.456632					YOR009W	YOR009W	36.9733	29.8225	1.23978	0.50696					YBL047C	YBL047C	38.9077	31.6489	1.22936	0.472857
YDR248C	YDR248C	33.3824	27.0156	1.23567	0.455841					YLR200W	YLR200W	45.7899	36.9351	1.23974	0.506209					YDL234C	YDL234C	37.3851	30.411	1.22933	0.472343
YHL007C	YHL007C	31.9231	25.835	1.23565	0.455482					YAL068C	YAL068C	36.5488	29.4837	1.23963	0.504085					YLR172C	YLR172C	35.8228	29.141	1.22929	0.47159
YJL206C	YJL206C	32.7809	26.5304	1.2356	0.454382					YDR061W	YDR061W	35.5085	28.6448	1.23962	0.503826					YHL022C	YHL022C	35.9085	29.211	1.22928	0.471326
YLR172C	YLR172C	32.8272	26.5699	1.2355	0.452517					YLR357W	YLR357W	44.2092	35.6657	1.23954	0.502487					YKR096W	YKR096W	36.6003	29.7747	1.22924	0.470654
YGR028W	YGR028W	32.6075	26.3951	1.23536	0.449744					YLL029W	YLL029W	34.8765	28.1369	1.23953	0.502233					YFR013W	YFR013W	35.8449	29.1602	1.22924	0.470588
YOL033W	YOL033W	31.7778	25.7253	1.23527	0.447985					YNL035C	YNL035C	34.9521	28.1979	1.23953	0.502167					YIL098C	YIL098C	35.234	28.6647	1.22918	0.469407
YNL257C	YNL257C	32.0994	25.9861	1.23526	0.447616					YKR042W	YKR042W	35.4555	28.6042	1.23952	0.502091					YDR369C	YDR369C	38.1181	31.0121	1.22914	0.468559
YLR144C	YLR144C	34.7967	28.1698	1.23525	0.447518					YGR239C	YGR239C	34.956	28.2016	1.2395	0.501723					YNL223W	YNL223W	36.4367	29.6445	1.22912	0.468322
YDL025C	YDL025C	33.2931	26.9526	1.23525	0.44742					YNL280C	YNL280C	34.4572	27.7998	1.23948	0.501186					YIL065C	YIL065C	38.0253	30.9384	1.22907	0.46721
YOR298C-A	YOR298C-A	32.7899	26.5463	1.2352	0.446493					YMR048W	YMR048W	35.4843	28.6292	1.23945	0.500629					YJL155C	YJL155C	33.8328	27.5288	1.229	0.46585
YJL218W	YJL218W	31.479	25.4855	1.23517	0.445947					YKR059W	YKR059W	37.3554	30.139	1.23944	0.50048					YDR249C	YDR249C	36.1248	29.3946	1.22896	0.465108
YDR218C	YDR218C	33.4723	27.0993	1.23517	0.445906					YER059W	YER059W	37.1221	29.951	1.23943	0.500253					YHR046C	YHR046C	35.5338	28.9147	1.22892	0.464329
YGL010W	YGL010W	33.115	26.8113	1.23511	0.444772					YDR467C	YDR467C	36.6784	29.5944	1.23937	0.499213					YDR247W	YDR247W	35.8987	29.2119	1.22891	0.464095
YBR111C	YBR111C	33.9552	27.493	1.23505	0.443474					YJL165C	YJL165C	34.4602	27.8053	1.23934	0.498624					YMR075C-A	YMR075C-A	38.1451	31.0406	1.22888	0.463612
YLR206W	YLR206W	31.8909	25.8221	1.23502	0.443022					YDL172C	YDL172C	35.6373	28.7552	1.23933	0.498474					YAR020C	YAR020C	35.9292	29.2377	1.22887	0.463303
YDR233C	YDR233C	33.9334	27.4766	1.23499	0.442371					YJR043C	YJR043C	40.1481	32.3966	1.23927	0.497237					YER056C-A	YER056C-A	37.9598	30.8916	1.22881	0.462186
YGR110W	YGR110W	33.4076	27.0526	1.23491	0.440818					YLR176C	YLR176C	38.2576	30.8729	1.23919	0.495865					YMR216C	YMR216C	33.9351	27.6166	1.22879	0.461856
YML010W-A	YML010W-A	35.7763	28.9717	1.23487	0.439925					YPL067C	YPL067C	36.8098	29.7046	1.23919	0.495843					YOR222W	YOR222W	35.9766	29.2781	1.22879	0.461827
YER027C	YER027C	36.3942	29.4725	1.23485	0.439578					YIL133C	YIL133C	34.5336	27.8683	1.23917	0.495425					YGR285C	YGR285C	35.236	28.6762	1.22876	0.461179
YFL063W	YFL063W	32.4363	26.2679	1.23483	0.439143					YBR215W	YBR215W	36.3792	29.3581	1.23915	0.495067					YML107C	YML107C	36.245	29.4991	1.22868	0.459732
YHR198C	YHR198C	33.7502	27.3331	1.23477	0.438051					YBL031W	YBL031W	35.3515	28.5295	1.23912	0.494433					YER163C	YER163C	36.9931	30.1094	1.22862	0.458556
YPR171W	YPR171W	33.8031	27.3763	1.23476	0.437755					YGL036W	YGL036W	35.3899	28.5612	1.23909	0.493949					YLR176C	YLR176C	38.0013	30.9335	1.22849	0.455938
YCR067C	YCR067C	34.4388	27.8932	1.23467	0.435944					YHL003C	YHL003C	36.369	29.3515	1.23908	0.493762					YMR312W	YMR312W	37.2029	30.2846	1.22844	0.455126
YKL076C	YKL076C	34.4461	27.9008	1.23459	0.434503					YBL002W	YBL002W	35.059	28.2959	1.23901	0.492457					YDR093W	YDR093W	36.6276	29.817	1.22841	0.454543
YDR346C	YDR346C	34.0498	27.5809	1.23454	0.433464					YGR007W	YGR007W	37.3119	30.1151	1.23898	0.491761					YOR032C	YOR032C	35.3253	28.7572	1.2284	0.454229
YNL154C	YNL154C	32.0803	25.9871	1.23447	0.432056					YBR093C	YBR093C	33.9163	27.3748	1.23896	0.491477					YJR059W	YJR059W	37.5738	30.5889	1.22835	0.453249
YIL029C	YIL029C	34.9599	28.321	1.23441	0.430924					YNR030W	YNR030W	36.4966	29.4574	1.23896	0.491471					YOR037W	YOR037W	34.9742	28.4737	1.2283	0.452266
YOR275C	YOR275C	32.4085	26.2548	1.23438	0.430349					YNR012W	YNR012W	36.2234	29.239	1.23887	0.489746					YBL002W	YBL002W	35.1713	28.6347	1.22827	0.45182
YHR005C	YHR005C	32.8032	26.5746	1.23438	0.430236					YGL153W	YGL153W	37.006	29.8713	1.23885	0.489314					YCR067C	YCR067C	35.752	29.109	1.22821	0.450572
YIL044C	YIL044C	32.7557	26.5367	1.23435	0.429718					YJL120W	YJL120W	37.2239	30.0477	1.23883	0.488934					YER059W	YER059W	37.7815	30.7625	1.22817	0.449701
YAL028W	YAL028W	33.4323	27.0851	1.23434	0.429521					YDR439W	YDR439W	34.1701	27.5832	1.2388	0.488408					YNL304W	YNL304W	36.0729	29.3733	1.22809	0.44817
YPL240C	YPL240C	34.0153	27.5576	1.23433	0.429357					YHR168W	YHR168W	34.9817	28.2386	1.23879	0.488199					YMR036C	YMR036C	37.4492	30.494	1.22809	0.448165
YDL066W	YDL066W	32.5886	26.4019	1.23433	0.429216					YJL137C	YJL137C	34.9253	28.1931	1.23879	0.488177					YEL023C	YEL023C	36.1743	29.4561	1.22808	0.447955
YNL117W	YNL117W	32.5258	26.3522	1.23427	0.428127					YAL007C	YAL007C	37.0609	29.9184	1.23873	0.487112					YDL219W	YDL219W	35.3131	28.7555	1.22805	0.447417
YNL255C	YNL255C	37.1694	30.1153	1.23423	0.427354					YGL002W	YGL002W	34.2487	27.6489	1.2387	0.486516					YML010W-A	YML010W-A	37.2928	30.3682	1.22802	0.446924
YER046W	YER046W	33.203	26.9034	1.23416	0.42582					YAL014C	YAL014C	34.5862	27.9234	1.23861	0.484833					YBL031W	YBL031W	34.7164	28.2707	1.228	0.446484
YJR128W	YJR128W	33.8874	27.4593	1.23409	0.424604					YML103C	YML103C	38.2085	30.848	1.2386	0.484711					YDR465C	YDR465C	35.1376	28.6156	1.22792	0.444847
YEL023C	YEL023C	33.8027	27.391	1.23408	0.424318					YDL234C	YDL234C	37.146	29.9912	1.23856	0.483949					YAL014C	YAL014C	34.8138	28.3528	1.22788	0.444105
YJR097W	YJR097W	35.0835	28.4304	1.23401	0.423003					YPL032C	YPL032C	37.404	30.1997	1.23855	0.483754					YDR467C	YDR467C	36.279	29.5498	1.22772	0.441105
YDR423C	YDR423C	32.1333	26.0398	1.23401	0.422843					YMR151W	YMR151W	35.8021	28.9069	1.23853	0.483307					YPL224C	YPL224C	35.1504	28.6315	1.22768	0.440311
YNL194C	YNL194C	32.9281	26.6839	1.23401	0.42283					YDR293C	YDR293C	37.5555	30.3235	1.23849	0.482614					YNL198C	YNL198C	36.1003	29.4055	1.22767	0.440108
YPL072W	YPL072W	34.4405	27.9099	1.23398	0.422423					YNL164C	YNL164C	35.6066	28.7519	1.23841	0.481003					YPL241C	YPL241C	37.2841	30.3701	1.22766	0.439817
YDL175C	YDL175C	33.9238	27.4925	1.23393	0.421306					YIR025W	YIR025W	36.631	29.5834	1.23823	0.477585					YOL093W	YOL093W	39.4682	32.1503	1.22762	0.439047
YML115C	YML115C	34.4374	27.9089	1.23392	0.421145					YOR233W	YOR233W	36.0361	29.1047	1.23815	0.476171					YMR077C	YMR077C	35.6456	29.0376	1.22757	0.438081
YGL088W	YGL088W	34.4923	27.9541	1.23389	0.420526					YLL027W	YLL027W	36.3263	29.3399	1.23812	0.475537					YHR016C	YHR016C	34.6428	28.2226	1.22749	0.436493
YNR012W	YNR012W	33.5361	27.1793	1.23388	0.420426					YJL071W	YJL071W	37.1569	30.0113	1.2381	0.475131					YKL170W	YKL170W	36.3337	29.6002	1.22748	0.436416
YGL115W	YGL115W	33.8828	27.4604	1.23388	0.420292					YJR091C	YJR091C	34.4881	27.8567	1.23806	0.474354					YNL123W	YNL123W	37.3839	30.4579	1.22739	0.434699
YLR286C	YLR286C	33.2192	26.9229	1.23386	0.419973					YOR041C	YOR041C	36.7047	29.649	1.23797	0.472784					YLR427W	YLR427W	40.0137	32.6015	1.22736	0.434031
YEL040W	YEL040W	35.3408	28.6435	1.23382	0.419079					YGR284C	YGR284C	36.0409	29.1129	1.23797	0.472731					YLR165C	YLR165C	35.5864	28.9966	1.22726	0.432113
YGR196C	YGR196C	34.7733	28.1845	1.23377	0.418181					YLR121C	YLR121C	34.8697	28.168	1.23792	0.471711					YDL056W	YDL056W	37.1587	30.2779	1.22725	0.431987
YEL062W	YEL062W	35.1821	28.5163	1.23375	0.417853					YNL293W	YNL293W	36.4315	29.43	1.23791	0.471492					YBR260C	YBR260C	37.1739	30.2906	1.22724	0.431757
YBR065C	YBR065C	33.8116	27.4064	1.23371	0.416988					YGR236C	YGR236C	36.851	29.7689	1.2379	0.471447					YNL047C	YNL047C	37.4036	30.4801	1.22715	0.42991
YDR270W	YDR270W	34.4652	27.9392	1.23358	0.414409					YNL087W	YNL087W	36.116	29.1757	1.23788	0.471024					YML047C	YML047C	36.1089	29.4271	1.22707	0.428333
YPL194W	YPL194W	33.497	27.1545	1.23357	0.414207					YKR018C	YKR018C	41.1092	33.2099	1.23786	0.470584					YNL299W	YNL299W	37.315	30.4104	1.22705	0.427964
YER088C	YER088C	33.5455	27.1939	1.23357	0.414149					YDL214C	YDL214C	36.7673	29.703	1.23783	0.470114					YIL139C	YIL139C	35.3075	28.7745	1.22704	0.427896
YJR083C	YJR083C	33.3697	27.0516	1.23356	0.413948					YOL079W	YOL079W	33.6595	27.1924	1.23783	0.470024					YDR344C	YDR344C	35.709	29.1025	1.22701	0.427184
YOR024W	YOR024W	34.5492	28.008	1.23354	0.413705					YEL009C	YEL009C	36.5373	29.5195	1.23773	0.468228					YIL064W	YIL064W	36.679	29.8951	1.22693	0.425603
YNR037C	YNR037C	32.1552	26.0684	1.23349	0.412693					YOL159C	YOL159C	36.6699	29.6277	1.23769	0.46745					YER030W	YER030W	36.4672	29.7229	1.22691	0.425213
YNR040W	YNR040W	33.2738	26.9759	1.23346	0.412037					YJR050W	YJR050W	35.1749	28.4204	1.23766	0.466865					YMR279C	YMR279C	35.5425	28.9696	1.22689	0.424852
YAL014C	YAL014C	32.2057	26.1106	1.23343	0.411526					YDR263C	YDR263C	35.5989	28.7645	1.2376	0.465649					YNL128W	YNL128W	36.1743	29.4856	1.22685	0.424086
YLR225C	YLR225C	32.6755	26.4917	1.23342	0.41127					YML010W-A	YML010W-A	38.2603	30.9151	1.23759	0.465545					YPL265W	YPL265W	37.0174	30.1731	1.22684	0.423853
YKL075C	YKL075C	33.4303	27.1037	1.23342	0.411239					YDL009C	YDL009C	35.8246	28.9471	1.23759	0.465489					YNL142W	YNL142W	35.7076	29.1055	1.22683	0.423828
YIL027C	YIL027C	33.4612	27.1296	1.23338	0.410517					YOR298C-A	YOR298C-A	35.2192	28.4587	1.23755	0.464822					YER049W	YER049W	35.9552	29.3073	1.22683	0.423816
YDL184C	YDL184C	33.4082	27.0894	1.23326	0.408008					YGR107W	YGR107W	35.0563	28.3274	1.23754	0.464565					YFR048W	YFR048W	35.6124	29.029	1.22679	0.422886
YOL159C	YOL159C	33.4506	27.1242	1.23324	0.407595					YLL010C	YLL010C	36.3878	29.4038	1.23752	0.46422					YBL039C	YBL039C	39.435	32.1457	1.22676	0.422349
YOR301W	YOR301W	35.2949	28.6218	1.23315	0.405816					YJL129C	YJL129C	36.7716	29.716	1.23743	0.46254					YCR098C	YCR098C	35.8577	29.2302	1.22674	0.421945
YOR284W	YOR284W	33.7468	27.3666	1.23314	0.405658					YDR121W	YDR121W	37.3784	30.2097	1.2373	0.459988					YKL071W	YKL071W	36.6406	29.8686	1.22673	0.421723
YIL054W	YIL054W	36.7072	29.7677	1.23312	0.405328					YNL257C	YNL257C	34.8999	28.2067	1.23729	0.459796					YGL087C	YGL087C	36.7097	29.9255	1.2267	0.421234
YMR104C	YMR104C	32.7589	26.5662	1.2331	0.404913					YOR052C	YOR052C	37.5048	30.3122	1.23728	0.459743					YKR052C	YKR052C	35.568	28.995	1.22669	0.421088
YCL034W	YCL034W	34.008	27.581	1.23302	0.403345					YNL069C	YNL069C	34.6076	27.9706	1.23728	0.459727					YNL091W	YNL091W	34.5464	28.1628	1.22667	0.420565
YDR379W	YDR379W	33.8886	27.4843	1.23302	0.403223					YBR066C	YBR066C	37.4594	30.2762	1.23725	0.459157					YOR058C	YOR058C	37.3446	30.4451	1.22662	0.41968
YJL070C	YJL070C	33.3238	27.0266	1.233	0.402953					YCR102W-A	YCR102W-A	35.397	28.6098	1.23724	0.458803					YBR031W	YBR031W	35.174	28.6784	1.2265	0.417254
YOR165W	YOR165W	35.1905	28.5409	1.23298	0.402607					YNR015W	YNR015W	36.3972	29.4183	1.23723	0.45868					YNR058W	YNR058W	35.5777	29.0077	1.22649	0.417193
YGR122W	YGR122W	33.0007	26.7669	1.23289	0.400732					YMR011W	YMR011W	37.1763	30.0494	1.23717	0.45765					YMR151W	YMR151W	36.0207	29.3701	1.22644	0.416161
YBL082C	YBL082C	33.3831	27.0778	1.23286	0.400114					YJL102W	YJL102W	35.3438	28.5693	1.23713	0.456722					YML115C	YML115C	36.6782	29.9069	1.22641	0.41561
YJL098W	YJL098W	33.8699	27.4727	1.23286	0.400053					YGR093W	YGR093W	35.1159	28.3853	1.23712	0.45658					YNL136W	YNL136W	36.0374	29.385	1.22639	0.415165
YDR505C	YDR505C	43.791	35.5211	1.23282	0.399276					YBR298C	YBR298C	39.1652	31.6585	1.23712	0.45653					YEL016C	YEL016C	37.1035	30.2546	1.22638	0.414913
YMR041C	YMR041C	32.3787	26.2645	1.23279	0.398822					YNL037C	YNL037C	34.96	28.2602	1.23708	0.455787					YHR104W	YHR104W	35.4651	28.919	1.22636	0.414615
YML129C	YML129C	31.2676	25.3643	1.23274	0.397804					YNR032C-A	YNR032C-A	36.3174	29.3579	1.23706	0.455429					YIL160C	YIL160C	38.062	31.0376	1.22632	0.413815
YNL289W	YNL289W	32.7488	26.5677	1.23266	0.39614					YER016W	YER016W	36.7285	29.6904	1.23705	0.4553					YLL039C	YLL039C	36.5672	29.8189	1.22631	0.41364
YNL050C	YNL050C	33.1239	26.8724	1.23264	0.395677					YIL132C	YIL132C	35.463	28.668	1.23703	0.454865					YJL042W	YJL042W	36.5005	29.765	1.22629	0.413207
YKR085C	YKR085C	32.7741	26.5891	1.23261	0.39525					YEL041W	YEL041W	36.5592	29.556	1.23695	0.45338					YML103C	YML103C	38.1738	31.1319	1.2262	0.411428
YNR041C	YNR041C	32.4972	26.3645	1.23261	0.395211					YHR060W	YHR060W	35.5462	28.738	1.23691	0.452597					YLR146C	YLR146C	35.9641	29.3308	1.22615	0.410622
YER035W	YER035W	34.2968	27.8252	1.23258	0.394622					YKL216W	YKL216W	33.5033	27.087	1.23688	0.452085					YDR424C	YDR424C	35.924	29.2982	1.22615	0.410498
YGR188C	YGR188C	35.094	28.4729	1.23254	0.393768					YIL009C-A	YIL009C-A	38.8067	31.3749	1.23687	0.451901					YEL013W	YEL013W	34.977	28.5276	1.22608	0.409116
YKL093W	YKL093W	34.4497	27.951	1.2325	0.393073					YFR044C	YFR044C	35.3301	28.5659	1.23679	0.45046					YNR032C-A	YNR032C-A	37.0628	30.2302	1.22602	0.407995
YBR106W	YBR106W	42.3156	34.3342	1.23246	0.392264					YDR354W	YDR354W	35.5089	28.7146	1.23662	0.447083					YDL168W	YDL168W	35.7961	29.1972	1.22601	0.407823
YPR023C	YPR023C	35.0827	28.4665	1.23242	0.391442					YER164W	YER164W	35.6709	28.8456	1.23661	0.447028					YDR445C	YDR445C	35.9125	29.293	1.22597	0.407095
YOR017W	YOR017W	34.5786	28.0575	1.23242	0.391376					YDR233C	YDR233C	36.1784	29.2563	1.2366	0.446807					YLR444C	YLR444C	35.385	28.8634	1.22595	0.40663
YKL053W	YKL053W	35.9785	29.1936	1.23241	0.391255					YMR098C	YMR098C	35.9621	29.0826	1.23655	0.445837					YDL013W	YDL013W	37.4633	30.5599	1.2259	0.405615
YJR020W	YJR020W	32.6662	26.5063	1.23239	0.390916					YPL029W	YPL029W	35.9725	29.0918	1.23652	0.445231					YKL150W	YKL150W	35.8884	29.2769	1.22583	0.404233
YHR136C	YHR136C	35.0883	28.4722	1.23237	0.390458					YLR330W	YLR330W	37.3506	30.208	1.23645	0.443898					YOR024W	YOR024W	37.6447	30.7101	1.22581	0.403854
YLL009C	YLL009C	31.8855	25.874	1.23233	0.389727					YGR170W	YGR170W	35.2835	28.537	1.23641	0.443228					YGL234W	YGL234W	37.3433	30.4663	1.22572	0.402262
YDL088C	YDL088C	33.6581	27.3135	1.23229	0.388831					YOR386W	YOR386W	34.5895	27.9783	1.2363	0.441121					YLL005C	YLL005C	35.9886	29.3611	1.22572	0.402248
YNL176C	YNL176C	33.0549	26.8242	1.23228	0.388663					YCR098C	YCR098C	35.5934	28.7918	1.23624	0.439896					YPL091W	YPL091W	35.7506	29.1671	1.22572	0.402122
YNL104C	YNL104C	33.6409	27.3	1.23227	0.388365					YOR283W	YOR283W	36.9016	29.8505	1.23621	0.439412					YHR086W	YHR086W	35.8853	29.2773	1.22571	0.401924
YDL138W	YDL138W	33.1384	26.8931	1.23222	0.387534					YMR130W	YMR130W	34.0802	27.5686	1.2362	0.439175					YDL202W	YDL202W	34.3943	28.0613	1.22568	0.401441
YJL165C	YJL165C	32.5708	26.4326	1.23222	0.387394					YKL074C	YKL074C	37.1863	30.0812	1.2362	0.43913					YOR215C	YOR215C	36.0019	29.3738	1.22565	0.400774
YCR024C	YCR024C	34.4945	27.9943	1.23219	0.386952					YGL023C	YGL023C	34.2002	27.6669	1.23614	0.438149					YBR281C	YBR281C	39.3877	32.1363	1.22565	0.40074
YOR161C	YOR161C	33.1578	26.9105	1.23215	0.386099					YDR274C	YDR274C	36.372	29.4247	1.2361	0.437403					YAL061W	YAL061W	36.061	29.4235	1.22559	0.399553
YAL067C	YAL067C	33.5377	27.2191	1.23214	0.385905					YOR275C	YOR275C	35.3938	28.6337	1.23609	0.437124					YLR451W	YLR451W	36.8871	30.0981	1.22557	0.399166
YKL110C	YKL110C	35.1433	28.5222	1.23214	0.385828					YER060W-A	YER060W-A	36.8231	29.7922	1.236	0.43539					YMR011W	YMR011W	36.2887	29.6099	1.22556	0.399016
YKL073W	YKL073W	34.3882	27.91	1.23211	0.3853					YDR313C	YDR313C	36.2443	29.3261	1.23591	0.433648					YOR275C	YOR275C	35.9539	29.3376	1.22552	0.398325
YOR051C	YOR051C	34.4206	27.9374	1.23206	0.384364					YLR027C	YLR027C	37.6425	30.4588	1.23585	0.432575					YIR017C	YIR017C	37.603	30.6842	1.22548	0.397563
YAL064C-A	YAL064C-A	32.5671	26.4337	1.23203	0.383702					YGL007W	YGL007W	37.2911	30.1751	1.23582	0.432124					YHR097C	YHR097C	33.937	27.6929	1.22548	0.397429
YDR048C	YDR048C	33.7681	27.4086	1.23203	0.38363					YIL139C	YIL139C	34.5174	27.9312	1.2358	0.43165					YOR092W	YOR092W	36.2524	29.5823	1.22548	0.397419
YBR274W	YBR274W	32.1298	26.0793	1.23201	0.383208					YNR021W	YNR021W	34.4495	27.8764	1.23579	0.431487					YLR038C	YLR038C	34.6754	28.2957	1.22547	0.397288
YOL019W	YOL019W	33.1494	26.9074	1.23198	0.382782					YIL123W	YIL123W	34.9964	28.3211	1.2357	0.429718					YDR282C	YDR282C	35.4777	28.9506	1.22546	0.397043
YJR001W	YJR001W	32.4844	26.3677	1.23198	0.382627					YBR105C	YBR105C	36.4436	29.4932	1.23566	0.429026					YOR243C	YOR243C	37.4152	30.5317	1.22545	0.397019
YHR086W	YHR086W	32.9465	26.7445	1.2319	0.381093					YEL013W	YEL013W	34.9582	28.2913	1.23565	0.428796					YKL017C	YKL017C	36.3499	29.6629	1.22543	0.396599
YLR028C	YLR028C	34.1702	27.7383	1.23188	0.380657					YML021C	YML021C	35.6696	28.8672	1.23564	0.428676					YDR439W	YDR439W	33.996	27.7423	1.22542	0.396399
YBL064C	YBL064C	35.877	29.1267	1.23175	0.378195					YHR045W	YHR045W	35.2693	28.5437	1.23562	0.42834					YHR171W	YHR171W	34.4699	28.1297	1.22539	0.395811
YNL031C	YNL031C	33.7601	27.4085	1.23174	0.377855					YOR037W	YOR037W	34.7185	28.0983	1.23561	0.428047					YCR053W	YCR053W	35.8683	29.2721	1.22534	0.39476
YOR170W	YOR170W	34.2205	27.7824	1.23174	0.37784					YNL046W	YNL046W	36.8457	29.8232	1.23547	0.425463					YAL068C	YAL068C	36.5159	29.8025	1.22526	0.393252
YGL087C	YGL087C	34.7279	28.1953	1.23169	0.37696					YGR008C	YGR008C	37.1226	30.0476	1.23546	0.425193					YJR082C	YJR082C	36.533	29.817	1.22524	0.392849
YFR047C	YFR047C	33.5177	27.213	1.23168	0.376783					YHR082C	YHR082C	35.8173	28.9912	1.23545	0.425087					YGL002W	YGL002W	34.6804	28.3059	1.2252	0.392051
YPL115C	YPL115C	33.1534	26.9177	1.23166	0.376285					YBR183W	YBR183W	37.6958	30.5127	1.23541	0.42434					YBR213W	YBR213W	35.0714	28.6271	1.22511	0.390333
YNL166C	YNL166C	32.7153	26.5627	1.23163	0.375695					YLL032C	YLL032C	36.9763	29.9316	1.23536	0.423306					YJL070C	YJL070C	35.7764	29.2028	1.2251	0.390121
YMR068W	YMR068W	33.1244	26.8962	1.23157	0.37448					YLL005C	YLL005C	35.9005	29.0626	1.23528	0.421841					YOR292C	YOR292C	35.4397	28.9285	1.22508	0.389667
YCR086W	YCR086W	33.8921	27.5198	1.23156	0.374289					YKL110C	YKL110C	36.9499	29.9139	1.23521	0.420451					YNR040W	YNR040W	35.9858	29.3765	1.22498	0.387868
YHL043W	YHL043W	34.0087	27.615	1.23153	0.373774					YOL019W	YOL019W	35.4729	28.7237	1.23497	0.415952					YCR024C	YCR024C	37.3433	30.4851	1.22497	0.387561
YJL152W	YJL152W	33.4703	27.1789	1.23148	0.372749					YNR075W	YNR075W	41.916	33.9425	1.23491	0.414865					YLR439W	YLR439W	35.5793	29.0458	1.22494	0.386925
YGR155W	YGR155W	33.1824	26.9459	1.23145	0.372099					YKL075C	YKL075C	36.5941	29.6336	1.23488	0.414338					YOR156C	YOR156C	38.862	31.7265	1.22491	0.386392
YDR197W	YDR197W	31.9175	25.9187	1.23144	0.372078					YIL122W	YIL122W	36.0025	29.1546	1.23488	0.414273					YGR040W	YGR040W	34.7222	28.3478	1.22486	0.385546
YIL128W	YIL128W	33.4592	27.1713	1.23142	0.371504					YHR162W	YHR162W	34.0678	27.5882	1.23487	0.414027					YLL048C	YLL048C	36.0626	29.4425	1.22485	0.385246
YDL009C	YDL009C	33.643	27.3209	1.2314	0.371248					YDR282C	YDR282C	35.3253	28.6067	1.23486	0.413939					YER017C	YER017C	36.5981	29.8799	1.22484	0.385117
YFR013W	YFR013W	32.9807	26.7843	1.23135	0.370144					YNL208W	YNL208W	34.7794	28.1647	1.23486	0.413801					YDR334W	YDR334W	39.8315	32.5205	1.22481	0.38455
YBL015W	YBL015W	33.4673	27.1799	1.23133	0.369754					YMR322C	YMR322C	35.2923	28.5819	1.23478	0.41234					YDR218C	YDR218C	35.8383	29.2608	1.22479	0.384076
YKL114C	YKL114C	34.1316	27.7196	1.23132	0.369574					YML038C	YML038C	35.032	28.3718	1.23475	0.411788					YOR136W	YOR136W	36.198	29.5545	1.22479	0.384049
YFR043C	YFR043C	33.6211	27.3052	1.23131	0.369367					YBR077C	YBR077C	35.4304	28.6944	1.23475	0.411782					YDL001W	YDL001W	37.589	30.6907	1.22477	0.38369
YNL303W	YNL303W	32.2121	26.1623	1.23124	0.368038					YDR358W	YDR358W	35.9297	29.0988	1.23475	0.411733					YAL064C-A	YAL064C-A	35.5668	29.0402	1.22475	0.383242
YPL004C	YPL004C	33.9303	27.5579	1.23124	0.367941					YIL099W	YIL099W	35.8071	28.9999	1.23473	0.411479					YMR081C	YMR081C	35.872	29.2903	1.2247	0.382419
YHR046C	YHR046C	33.5296	27.2338	1.23118	0.366768					YEL017W	YEL017W	36.3409	29.4322	1.23473	0.41145					YAL015C	YAL015C	36.2701	29.6162	1.22467	0.381765
YER124C	YER124C	34.4867	28.0116	1.23116	0.366357					YGR181W	YGR181W	36.0867	29.2264	1.23473	0.411442					YOL001W	YOL001W	35.6857	29.1403	1.22462	0.380701
YMR299C	YMR299C	35.9414	29.1958	1.23105	0.364196					YHL046C	YHL046C	36.2276	29.3408	1.23472	0.41116					YCR060W	YCR060W	36.2705	29.6183	1.2246	0.380374
YDR234W	YDR234W	34.6059	28.1118	1.23101	0.363427					YCR027C	YCR027C	39.042	31.6209	1.23469	0.41067					YNL090W	YNL090W	35.4303	28.9328	1.22457	0.379841
YIR033W	YIR033W	33.5939	27.2901	1.23099	0.363077					YDR368W	YDR368W	36.0663	29.2109	1.23468	0.410551					YIL108W	YIL108W	34.931	28.5255	1.22455	0.379509
YOR252W	YOR252W	34.3899	27.937	1.23098	0.362805					YDR537C	YDR537C	35.9787	29.14	1.23468	0.410499					YNL255C	YNL255C	40.5376	33.1043	1.22455	0.379338
YJR113C	YJR113C	32.9699	26.7841	1.23095	0.362322					YHR078W	YHR078W	35.8848	29.0642	1.23467	0.410329					YBL008W	YBL008W	37.5069	30.6293	1.22454	0.379319
YKL087C	YKL087C	33.2194	26.9879	1.2309	0.361285					YDR424C	YDR424C	36.397	29.4803	1.23462	0.409376					YAL028W	YAL028W	35.8033	29.2386	1.22452	0.378882
YHR016C	YHR016C	33.4175	27.1493	1.23088	0.360824					YGL043W	YGL043W	35.3271	28.614	1.23461	0.409115					YHR006W	YHR006W	35.4077	28.9164	1.22448	0.37812
YEL017C-A	YEL017C-A	34.032	27.6498	1.23082	0.359777					YNR019W	YNR019W	36.4836	29.5507	1.23461	0.409076					YDR092W	YDR092W	36.3802	29.7117	1.22444	0.377316
YNL299W	YNL299W	35.3014	28.6814	1.23081	0.359539					YOR376W	YOR376W	36.6884	29.7182	1.23454	0.407862					YCR086W	YCR086W	35.802	29.2414	1.22436	0.375788
YGL042C	YGL042C	33.4405	27.1699	1.23079	0.359181					YGR234W	YGR234W	36.8194	29.8249	1.23452	0.407442					YNL280C	YNL280C	34.5869	28.2497	1.22433	0.375121
YOR153W	YOR153W	33.107	26.8993	1.23078	0.358822					YMR294W	YMR294W	33.9403	27.4929	1.23451	0.407312					YOR342C	YOR342C	36.5347	29.8422	1.22426	0.373875
YAR018C	YAR018C	37.1822	30.2123	1.2307	0.357234					YOR251C	YOR251C	36.0577	29.2083	1.2345	0.407122					YGR268C	YGR268C	37.5154	30.6441	1.22423	0.373199
YLR199C	YLR199C	34.0597	27.6766	1.23063	0.355975					YOR142W	YOR142W	36.3915	29.4789	1.23449	0.406946					YNR021W	YNR021W	34.357	28.0647	1.22421	0.372731
YIL114C	YIL114C	32.139	26.1159	1.23063	0.355898					YHL038C	YHL038C	34.7805	28.1739	1.23449	0.406881					YER061C	YER061C	35.314	28.8481	1.22414	0.371459
YML036W	YML036W	33.6647	27.3561	1.23061	0.355523					YMR065W	YMR065W	35.6147	28.8501	1.23447	0.406532					YJR060W	YJR060W	35.517	29.0142	1.22412	0.371136
YOR378W	YOR378W	32.8414	26.6876	1.23059	0.355125					YJL141C	YJL141C	33.9356	27.4901	1.23446	0.406391					YDR248C	YDR248C	35.7374	29.1946	1.22411	0.370889
YNL208W	YNL208W	32.4449	26.3663	1.23055	0.35431					YPL091W	YPL091W	35.8845	29.0693	1.23445	0.406086					YCR004C	YCR004C	33.5597	27.4162	1.22408	0.370331
YNL224C	YNL224C	34.9798	28.4263	1.23054	0.35421					YLR426W	YLR426W	36.8892	29.8837	1.23443	0.405687					YDR360W	YDR360W	36.1202	29.5083	1.22407	0.370123
YGR162W	YGR162W	34.5403	28.07	1.23051	0.353469					YJR034W	YJR034W	35.4107	28.6862	1.23442	0.405455					YDL138W	YDL138W	35.473	28.9799	1.22405	0.369793
YIL139C	YIL139C	32.3442	26.2858	1.23048	0.352962					YDR333C	YDR333C	36.0069	29.1697	1.2344	0.405114					YHR168W	YHR168W	34.8262	28.4518	1.22404	0.369585
YDR282C	YDR282C	34.2899	27.8675	1.23046	0.352625					YNL123W	YNL123W	36.5659	29.6225	1.23439	0.405071					YGR043C	YGR043C	35.0122	28.6046	1.22401	0.368868
YMR234W	YMR234W	33.5294	27.2495	1.23046	0.352557					YDR348C	YDR348C	36.4103	29.4969	1.23438	0.404707					YKL217W	YKL217W	34.6144	28.2799	1.22399	0.368559
YKR018C	YKR018C	37.5425	30.5111	1.23045	0.352448					YBL059W	YBL059W	35.2254	28.5383	1.23432	0.403614					YDR508C	YDR508C	36.2833	29.6444	1.22395	0.367846
YGR210C	YGR210C	33.0699	26.8764	1.23045	0.352278					YIL008W	YIL008W	37.4324	30.3272	1.23429	0.403					YNL285W	YNL285W	35.1075	28.6844	1.22393	0.367301
YIL072W	YIL072W	33.1614	26.9509	1.23044	0.352186					YDR242W	YDR242W	35.3726	28.6589	1.23426	0.402567					YIL138C	YIL138C	35.3165	28.8574	1.22383	0.365379
YPL232W	YPL232W	32.2765	26.2325	1.2304	0.351353					YGR019W	YGR019W	40.8401	33.0887	1.23426	0.402515					YOR226C	YOR226C	36.5624	29.8757	1.22382	0.365228
YPR065W	YPR065W	35.3513	28.7316	1.2304	0.351352					YOR015W	YOR015W	37.0239	29.9968	1.23426	0.402505					YLR443W	YLR443W	35.3016	28.846	1.2238	0.364775
YDR528W	YDR528W	34.9837	28.4332	1.23038	0.350982					YDL151C	YDL151C	37.9522	30.7504	1.2342	0.401413					YBL064C	YBL064C	38.1384	31.164	1.22379	0.364753
YBR199W	YBR199W	32.8743	26.7203	1.23031	0.349609					YAL046C	YAL046C	35.3296	28.6271	1.23413	0.400077					YJL149W	YJL149W	37.8012	30.8891	1.22377	0.364279
YHR103W	YHR103W	32.8364	26.6901	1.23028	0.349063					YFR046C	YFR046C	35.9923	29.165	1.23409	0.399352					YOR233W	YOR233W	35.8559	29.2996	1.22377	0.364188
YBR271W	YBR271W	32.4556	26.3807	1.23028	0.348987					YJL138C	YJL138C	37.7842	30.6176	1.23407	0.398864					YLR225C	YLR225C	34.9948	28.5961	1.22376	0.364104
YPL110C	YPL110C	34.7412	28.2387	1.23027	0.348737					YLR165C	YLR165C	36.0761	29.2336	1.23406	0.39876					YPR122W	YPR122W	37.7298	30.8313	1.22375	0.363868
YDR446W	YDR446W	33.6877	27.3834	1.23022	0.347837					YPR171W	YPR171W	36.6414	29.6918	1.23406	0.398724					YNL082W	YNL082W	37.188	30.3888	1.22374	0.363738
YNL304W	YNL304W	32.9044	26.7472	1.2302	0.347442					YFL010C	YFL010C	37.082	30.0506	1.23398	0.397285					YNL037C	YNL037C	35.091	28.676	1.22371	0.363072
YDL169C	YDL169C	33.087	26.8961	1.23018	0.346939					YOR205C	YOR205C	34.6284	28.0634	1.23393	0.396343					YIL130W	YIL130W	35.8669	29.311	1.22367	0.36229
YBR221C	YBR221C	34.4335	27.9916	1.23014	0.346193					YGR043C	YGR043C	34.5862	28.0302	1.23389	0.395562					YNR060W	YNR060W	35.0338	28.6302	1.22367	0.362275
YJL129C	YJL129C	34.1547	27.7652	1.23013	0.345943					YEL011W	YEL011W	36.0522	29.2185	1.23388	0.39537					YNL008C	YNL008C	34.6384	28.3081	1.22362	0.361409
YIR036C	YIR036C	33.8354	27.5064	1.23009	0.345283					YDL056W	YDL056W	36.6359	29.6924	1.23385	0.394758					YPL263C	YPL263C	36.7377	30.0261	1.22352	0.359496
YNR010W	YNR010W	40.5752	32.9861	1.23007	0.344821					YBR107C	YBR107C	35.3877	28.6808	1.23385	0.394691					YJL123C	YJL123C	39.7917	32.5235	1.22347	0.358541
YHL034C	YHL034C	34.2321	27.8297	1.23006	0.344571					YNL275W	YNL275W	35.4781	28.7548	1.23381	0.394094					YPR083W	YPR083W	35.683	29.1655	1.22346	0.358312
YDR179C	YDR179C	33.2662	27.0449	1.23004	0.344155					YPL183C	YPL183C	37.3775	30.295	1.23378	0.393522					YKR014C	YKR014C	45.4754	37.171	1.22341	0.357277
YKR041W	YKR041W	32.604	26.5076	1.22999	0.343215					YHR016C	YHR016C	35.089	28.4404	1.23377	0.393291					YNL316C	YNL316C	35.7952	29.2586	1.22341	0.357226
YGL086W	YGL086W	32.8019	26.6691	1.22996	0.342653					YPL055C	YPL055C	38.0246	30.8199	1.23377	0.393247					YPR065W	YPR065W	36.8191	30.0962	1.22338	0.356714
YOR136W	YOR136W	34.0532	27.6869	1.22994	0.34222					YPL274W	YPL274W	36.9592	29.9567	1.23376	0.392975					YDR330W	YDR330W	36.7253	30.0195	1.22338	0.356679
YNL164C	YNL164C	32.8461	26.7067	1.22988	0.341128					YDR134C	YDR134C	35.5067	28.7798	1.23374	0.392628					YOR097C	YOR097C	35.4537	28.9805	1.22336	0.356373
YLR030W	YLR030W	31.8231	25.8761	1.22983	0.340043					YDL219W	YDL219W	35.914	29.1104	1.23372	0.392254					YJL141C	YJL141C	34.5101	28.21	1.22333	0.355749
YOR376W	YOR376W	33.8542	27.5278	1.22982	0.339882					YMR167W	YMR167W	38.5855	31.2758	1.23372	0.39225					YGL154W	YGL154W	35.284	28.8427	1.22332	0.355578
YGL023C	YGL023C	33.2452	27.0328	1.22981	0.339754					YDR535C	YDR535C	35.6158	28.8701	1.23366	0.391121					YIL096C	YIL096C	34.7312	28.3924	1.22326	0.354271
YCR102W-A	YCR102W-A	33.0831	26.9014	1.22979	0.339323					YOR084W	YOR084W	36.4624	29.5565	1.23365	0.391051					YCR045C	YCR045C	40.5695	33.1686	1.22313	0.351839
YGL210W	YGL210W	33.8504	27.5262	1.22975	0.338484					YOR288C	YOR288C	35.1304	28.4774	1.23362	0.390469					YNL184C	YNL184C	34.5488	28.2464	1.22312	0.351668
YER061C	YER061C	32.8762	26.7342	1.22974	0.338361					YDR346C	YDR346C	35.8888	29.0927	1.2336	0.390093					YJR097W	YJR097W	38.3493	31.3538	1.22312	0.351582
YMR174C	YMR174C	33.8908	27.5597	1.22972	0.337969					YAR047C	YAR047C	36.6823	29.7364	1.23358	0.389708					YMR105C	YMR105C	38.17	31.2074	1.22311	0.351385
YHL003C	YHL003C	33.9748	27.6284	1.22971	0.337652					YCR083W	YCR083W	36.2653	29.3988	1.23356	0.38937					YNL022C	YNL022C	36.0333	29.4608	1.22309	0.351103
YJL178C	YJL178C	33.8551	27.5312	1.2297	0.337518					YLR432W	YLR432W	35.3969	28.6965	1.23349	0.387991					YJL153C	YJL153C	36.0314	29.4604	1.22305	0.350186
YML082W	YML082W	33.7379	27.4359	1.2297	0.337462					YKR028W	YKR028W	35.0165	28.3893	1.23344	0.38703					YOR301W	YOR301W	37.3472	30.5386	1.22295	0.348373
YDR202C	YDR202C	32.4266	26.3696	1.2297	0.337453					YIL114C	YIL114C	33.7576	27.37	1.23338	0.385875					YJL098W	YJL098W	36.4331	29.7916	1.22293	0.347997
YNL320W	YNL320W	32.2414	26.2192	1.22969	0.337274					YDR463W	YDR463W	37.0512	30.0408	1.23336	0.385529					YNL321W	YNL321W	35.4604	28.9964	1.22293	0.347868
YIL020C	YIL020C	32.4484	26.3893	1.22961	0.335644					YOR032C	YOR032C	34.9611	28.3477	1.23329	0.384254					YPL178W	YPL178W	37.7506	30.8693	1.22292	0.347704
YGL076C	YGL076C	32.7873	26.6654	1.22958	0.335125					YDR538W	YDR538W	35.2688	28.5978	1.23327	0.383765					YPL032C	YPL032C	37.1782	30.4015	1.22291	0.347513
YDR256C	YDR256C	33.1578	26.9688	1.22949	0.333311					YKL030W	YKL030W	34.5732	28.0347	1.23323	0.383004					YLR461W	YLR461W	36.3662	29.7382	1.22288	0.346893
YML117W-A	YML117W-A	33.6654	27.3822	1.22947	0.332852					YNL135C	YNL135C	37.0991	30.083	1.23323	0.382959					YMR114C	YMR114C	36.1566	29.567	1.22287	0.346774
YNL187W	YNL187W	33.3046	27.0888	1.22946	0.332768					YER121W	YER121W	35.5579	28.8333	1.23322	0.382939					YOL006C	YOL006C	33.4939	27.3905	1.22283	0.346021
YJL136C	YJL136C	35.262	28.6811	1.22945	0.33258					YOR040W	YOR040W	35.6855	28.937	1.23321	0.38274					YGR097W	YGR097W	35.3393	28.9021	1.22272	0.343954
YER106W	YER106W	33.0142	26.8532	1.22943	0.332249					YDL156W	YDL156W	35.548	28.8255	1.23321	0.382695					YJL157C	YJL157C	32.3158	26.4306	1.22267	0.342803
YBR275C	YBR275C	33.2159	27.0173	1.22943	0.332197					YOR195W	YOR195W	37.0369	30.0335	1.23319	0.382206					YEL017W	YEL017W	36.556	29.9001	1.2226	0.341567
YOR114W	YOR114W	34.6502	28.1845	1.22941	0.331696					YDR179C	YDR179C	35.9515	29.1553	1.2331	0.380652					YMR037C	YMR037C	36.0015	29.4469	1.22259	0.341287
YIL016W	YIL016W	33.1527	26.9667	1.22939	0.331433					YIL138C	YIL138C	35.053	28.4268	1.2331	0.380503					YMR119W	YMR119W	36.0696	29.5031	1.22257	0.340904
YHR154W	YHR154W	36.6177	29.7852	1.22939	0.331398					YDR371W	YDR371W	37.3439	30.2847	1.23309	0.380425					YDR259C	YDR259C	36.5824	29.9231	1.22255	0.340473
YAL065C	YAL065C	32.7947	26.6758	1.22938	0.331138					YOR066W	YOR066W	38.4631	31.193	1.23307	0.379959					YER024W	YER024W	36.1786	29.5931	1.22253	0.34027
YGR231C	YGR231C	30.7125	24.9822	1.22938	0.33108					YGR164W	YGR164W	36.0081	29.2026	1.23304	0.379518					YNL140C	YNL140C	36.2756	29.6734	1.22249	0.339443
YDR508C	YDR508C	33.5014	27.2508	1.22937	0.330992					YDR509W	YDR509W	35.5187	28.8083	1.23293	0.377432					YPL127C	YPL127C	35.2043	28.7977	1.22247	0.338958
YGR059W	YGR059W	33.4545	27.2133	1.22934	0.330407					YLR018C	YLR018C	39.6495	32.1592	1.23291	0.377035					YGL179C	YGL179C	35.0254	28.6516	1.22246	0.338795
YPR043W	YPR043W	33.3386	27.1223	1.2292	0.327551					YOR023C	YOR023C	37.6604	30.5463	1.2329	0.376708					YMR167W	YMR167W	38.1255	31.188	1.22244	0.338434
YOR267C	YOR267C	33.9452	27.6162	1.22918	0.327133					YCR089W	YCR089W	35.3925	28.7077	1.23286	0.375942					YJR034W	YJR034W	35.6325	29.1499	1.22239	0.337486
YDR195W	YDR195W	39.2675	31.9464	1.22917	0.326988					YNL332W	YNL332W	35.1744	28.5333	1.23275	0.373971					YOR142W	YOR142W	36.7985	30.1038	1.22239	0.337398
YFR046C	YFR046C	33.3863	27.1617	1.22917	0.326968					YML107C	YML107C	35.8945	29.1176	1.23275	0.373871					YNL329C	YNL329C	35.0113	28.6421	1.22237	0.33708
YGL228W	YGL228W	33.2174	27.0244	1.22916	0.326858					YNR007C	YNR007C	36.6629	29.7412	1.23273	0.373579					YJL100W	YJL100W	34.7612	28.4386	1.22232	0.336165
YHR078W	YHR078W	33.45	27.2137	1.22916	0.326828					YOL162W	YOL162W	35.4287	28.7407	1.2327	0.373041					YKL006W	YKL006W	37.0061	30.2757	1.2223	0.335752
YOR023C	YOR023C	34.964	28.446	1.22914	0.326321					YIL066C	YIL066C	37.2926	30.253	1.23269	0.372862					YML042W	YML042W	36.4064	29.7853	1.2223	0.335617
YGL101W	YGL101W	33.2513	27.0536	1.22909	0.325381					YGR131W	YGR131W	33.9979	27.5804	1.23268	0.372698					YDL189W	YDL189W	35.0405	28.6685	1.22227	0.33506
YPL270W	YPL270W	32.8365	26.7176	1.22902	0.324075					YNL198C	YNL198C	35.7271	28.9842	1.23264	0.371857					YNR005C	YNR005C	36.9117	30.1995	1.22226	0.334976
YDR493W	YDR493W	31.8314	25.9002	1.229	0.323633					YJL132W	YJL132W	35.2074	28.5635	1.2326	0.371183					YJR053W	YJR053W	36.8305	30.1338	1.22223	0.334396
YKR098C	YKR098C	33.672	27.3985	1.22897	0.323048					YKL170W	YKL170W	36.8275	29.8778	1.2326	0.371179					YGL221C	YGL221C	37.4022	30.6016	1.22223	0.334346
YDL219W	YDL219W	31.9571	26.004	1.22893	0.322265					YBR090C	YBR090C	34.8814	28.299	1.2326	0.37116					YHR204W	YHR204W	39.1746	32.0521	1.22222	0.334066
YHL022C	YHL022C	34.1716	27.8062	1.22892	0.322072					YNL176C	YNL176C	35.4238	28.7394	1.23258	0.370827					YEL039C	YEL039C	37.7576	30.8939	1.22217	0.333199
YBR278W	YBR278W	37.2517	30.313	1.2289	0.321696					YAL065C	YAL065C	35.3924	28.7141	1.23258	0.370704					YER010C	YER010C	35.3052	28.8873	1.22217	0.333196
YFR035C	YFR035C	31.4458	25.5887	1.22889	0.321496					YDL104C	YDL104C	34.7341	28.1829	1.23245	0.36827					YER035W	YER035W	37.0604	30.3248	1.22212	0.332113
YOL093W	YOL093W	36.8304	29.9709	1.22887	0.321081					YBR297W	YBR297W	38.0839	30.9015	1.23243	0.367864					YLR239C	YLR239C	35.6535	29.1736	1.22211	0.332087
YLR239C	YLR239C	32.3639	26.3365	1.22886	0.320875					YCR085W	YCR085W	39.2664	31.8611	1.23242	0.367756					YML076C	YML076C	35.5032	29.0518	1.22206	0.331114
YGR135W	YGR135W	33.6405	27.3754	1.22886	0.320859					YDL222C	YDL222C	36.2299	29.3974	1.23242	0.367728					YKL076C	YKL076C	36.5525	29.9106	1.22206	0.330987
YGR131W	YGR131W	32.0727	26.0998	1.22885	0.320624					YFL063W	YFL063W	33.5735	27.2424	1.2324	0.367274					YGL252C	YGL252C	37.2989	30.5214	1.22205	0.330934
YMR053C	YMR053C	33.412	27.1898	1.22884	0.32055					YPL123C	YPL123C	35.0229	28.4191	1.23237	0.366767					YGL089C	YGL089C	35.2047	28.8081	1.22204	0.330636
YNR058W	YNR058W	33.0633	26.9061	1.22884	0.320454					YDR284C	YDR284C	35.39	28.7172	1.23236	0.366612					YIR024C	YIR024C	36.4031	29.7896	1.22201	0.330037
YMR021C	YMR021C	33.4692	27.2372	1.22881	0.319815					YLR327C	YLR327C	35.2918	28.6391	1.23229	0.365316					YJL163C	YJL163C	37.7712	30.9092	1.22201	0.330022
YKL084W	YKL084W	33.0749	26.9166	1.22879	0.319559					YGL088W	YGL088W	36.4055	29.5433	1.23228	0.365002					YBR290W	YBR290W	36.2158	29.637	1.22198	0.329464
YGR040W	YGR040W	33.2755	27.0809	1.22875	0.318606					YIL072W	YIL072W	34.7758	28.2212	1.23226	0.364659					YOR052C	YOR052C	37.6665	30.8245	1.22196	0.329155
YOR223W	YOR223W	34.8586	28.3705	1.22869	0.317482					YOR097C	YOR097C	35.8961	29.1306	1.23225	0.364454					YHL046C	YHL046C	36.4646	29.8411	1.22196	0.329085
YPL267W	YPL267W	34.162	27.804	1.22867	0.317117					YDR104C	YDR104C	35.588	28.8815	1.23221	0.363741					YEL050C	YEL050C	35.5622	29.1028	1.22195	0.328897
YLL010C	YLL010C	35.0206	28.503	1.22867	0.317001					YHR136C	YHR136C	35.6738	28.9528	1.23214	0.362338					YGL115W	YGL115W	36.5978	29.9525	1.22186	0.327183
YGL057C	YGL057C	32.1943	26.2036	1.22862	0.316137					YIL113W	YIL113W	35.5049	28.816	1.23212	0.362082					YHR155W	YHR155W	36.6471	29.9931	1.22185	0.326941
YHR060W	YHR060W	33.3676	27.1589	1.22861	0.315842					YNL140C	YNL140C	36.0135	29.2291	1.23211	0.361904					YOR247W	YOR247W	37.0347	30.3119	1.22179	0.3258
YCR087W	YCR087W	36.0304	29.3274	1.22856	0.314829					YJR140C	YJR140C	36.7656	29.8399	1.2321	0.361592					YNL339C	YNL339C	35.1894	28.8015	1.22179	0.32578
YKL046C	YKL046C	31.6282	25.7442	1.22855	0.314777					YJL070C	YJL070C	35.2527	28.6123	1.23208	0.361301					YJL170C	YJL170C	35.1289	28.7521	1.22178	0.325681
YNL321W	YNL321W	33.6561	27.3951	1.22855	0.314672					YML042W	YML042W	35.7866	29.0458	1.23207	0.361166					YNL187W	YNL187W	35.2562	28.8564	1.22178	0.325641
YMR060C	YMR060C	35.9094	29.2292	1.22855	0.314623					YHR157W	YHR157W	37.0397	30.0636	1.23205	0.360626					YOR246C	YOR246C	35.6951	29.2158	1.22178	0.325512
YBL013W	YBL013W	33.7348	27.4599	1.22851	0.313985					YGL015C	YGL015C	35.5343	28.8421	1.23203	0.360273					YHR045W	YHR045W	35.0652	28.7005	1.22176	0.325253
YOR041C	YOR041C	34.3193	27.9357	1.22851	0.313913					YOR229W	YOR229W	36.2777	29.446	1.23201	0.359874					YIR018W	YIR018W	36.1223	29.5664	1.22174	0.324727
YOR270C	YOR270C	33.2654	27.0791	1.22845	0.312743					YGR143W	YGR143W	36.488	29.6176	1.23197	0.359177					YML096W	YML096W	37.7338	30.8857	1.22172	0.324494
YGL009C	YGL009C	32.9006	26.7836	1.22839	0.311492					YFR017C	YFR017C	37.6573	30.5669	1.23196	0.359103					YLR206W	YLR206W	35.8728	29.3625	1.22172	0.324426
YAL031C	YAL031C	33.6401	27.3858	1.22838	0.311318					YER180C	YER180C	36.479	29.6105	1.23196	0.359091					YLR228C	YLR228C	35.7556	29.2677	1.22168	0.323572
YLR410W	YLR410W	34.6705	28.2253	1.22835	0.310735					YFR043C	YFR043C	34.9836	28.3969	1.23195	0.358811					YKR097W	YKR097W	35.8473	29.3427	1.22168	0.32357
YJL102W	YJL102W	33.2972	27.1085	1.22829	0.309617					YJL042W	YJL042W	36.0842	29.2904	1.23195	0.358774					YMR294W	YMR294W	33.7786	27.6496	1.22167	0.323427
YBL002W	YBL002W	32.9495	26.827	1.22822	0.308257					YER187W	YER187W	36.1766	29.3664	1.2319	0.357966					YPL240C	YPL240C	36.8927	30.1991	1.22165	0.323039
YPL067C	YPL067C	35.3727	28.8001	1.22821	0.308027					YPL244C	YPL244C	36.5984	29.709	1.2319	0.357839					YDL172C	YDL172C	35.8668	29.3595	1.22164	0.322925
YHR161C	YHR161C	32.2967	26.296	1.2282	0.307756					YOL028C	YOL028C	36.4113	29.5572	1.23189	0.357717					YJL196C	YJL196C	35.6443	29.1774	1.22164	0.32289
YNL241C	YNL241C	33.6751	27.4187	1.22818	0.307392					YNR065C	YNR065C	35.0433	28.4471	1.23188	0.357453					YDR050C	YDR050C	36.7023	30.0436	1.22163	0.322771
YLR461W	YLR461W	33.5222	27.2945	1.22817	0.307098					YBL003C	YBL003C	36.4607	29.5979	1.23187	0.357296					YIL014W	YIL014W	35.1411	28.7657	1.22163	0.32274
YJL176C	YJL176C	34.9678	28.4719	1.22815	0.306769					YIL020C	YIL020C	36.2213	29.4043	1.23184	0.35669					YDL009C	YDL009C	35.8522	29.3491	1.22158	0.32167
YIL108W	YIL108W	32.9832	26.8564	1.22813	0.306425					YCR100C	YCR100C	36.1101	29.3142	1.23183	0.356577					YOR376W	YOR376W	36.182	29.6192	1.22157	0.321553
YCR053W	YCR053W	33.0488	26.9098	1.22813	0.30642					YER088C	YER088C	35.3618	28.7071	1.23181	0.356224					YMR119W-A	YMR119W-A	36.1094	29.5608	1.22153	0.320758
YDR069C	YDR069C	34.0801	27.7505	1.22809	0.30561					YGR268C	YGR268C	37.5481	30.4836	1.23175	0.354966					YHR049W	YHR049W	36.4005	29.7994	1.22152	0.320513
YMR221C	YMR221C	32.6485	26.5851	1.22807	0.305256					YIL054W	YIL054W	36.4782	29.6156	1.23172	0.354488					YJL165C	YJL165C	35.0468	28.693	1.22144	0.31897
YLR273C	YLR273C	35.1384	28.6135	1.22804	0.304559					YER024W	YER024W	36.363	29.5227	1.2317	0.354005					YER037W	YER037W	37.6072	30.7903	1.2214	0.318158
YJL130C	YJL130C	32.5201	26.4818	1.22802	0.304199					YOR384W	YOR384W	36.3198	29.4878	1.23169	0.35387					YNL009W	YNL009W	36.1572	29.6042	1.22135	0.317296
YHR017W	YHR017W	32.6917	26.6218	1.22801	0.303938					YJR066W	YJR066W	36.5354	29.6641	1.23164	0.352885					YPL199C	YPL199C	36.574	29.9456	1.22135	0.317146
YJL101C	YJL101C	35.2195	28.6804	1.228	0.303812					YDR251W	YDR251W	36.2538	29.4361	1.23161	0.352397					YEL031W	YEL031W	36.8743	30.1916	1.22134	0.317083
YNL086W	YNL086W	33.5406	27.3133	1.228	0.303746					YJL118W	YJL118W	35.6293	28.9297	1.23158	0.351893					YBR295W	YBR295W	38.9234	31.8698	1.22133	0.316776
YIL036W	YIL036W	32.5012	26.4671	1.22799	0.303544					YIR033W	YIR033W	36.5777	29.7001	1.23157	0.351562					YGL042C	YGL042C	36.849	30.1714	1.22132	0.316734
YDR275W	YDR275W	33.5797	27.3457	1.22797	0.303203					YJR078W	YJR078W	36.4813	29.6242	1.23147	0.349744					YDR379W	YDR379W	36.0497	29.5175	1.2213	0.316207
YOR086C	YOR086C	34.0085	27.6951	1.22796	0.303087					YML106W	YML106W	35.9673	29.2078	1.23143	0.348939					YDL089W	YDL089W	35.5567	29.1139	1.2213	0.316192
YIL090W	YIL090W	33.5093	27.2885	1.22796	0.303064					YNL142W	YNL142W	35.5	28.8285	1.23142	0.3488					YDR274C	YDR274C	36.404	29.8083	1.22127	0.315676
YNL034W	YNL034W	33.1636	27.0077	1.22793	0.302458					YJR128W	YJR128W	35.9753	29.2164	1.23134	0.347242					YNL183C	YNL183C	36.9754	30.2764	1.22126	0.315506
YJL151C	YJL151C	33.4758	27.263	1.22788	0.301502					YPL201C	YPL201C	36.1497	29.3593	1.23129	0.346285					YER075C	YER075C	35.1842	28.8101	1.22124	0.315176
YKL170W	YKL170W	34.0567	27.7371	1.22784	0.300657					YDL155W	YDL155W	37.1094	30.1395	1.23125	0.345658					YMR068W	YMR068W	36.2732	29.7027	1.22121	0.314487
YPR122W	YPR122W	34.2561	27.8998	1.22783	0.300377					YNL139C	YNL139C	44.7266	36.3264	1.23124	0.345401					YBR297W	YBR297W	38.3195	31.3786	1.2212	0.314285
YPR067W	YPR067W	33.7384	27.4791	1.22779	0.299579					YLR444C	YLR444C	35.2904	28.6628	1.23123	0.345143					YGR142W	YGR142W	35.4196	29.0054	1.22113	0.313061
YPL273W	YPL273W	32.8591	26.763	1.22778	0.299458					YHR097C	YHR097C	33.8879	27.5246	1.23119	0.344373					YCR024C-A	YCR024C-A	39.109	32.0268	1.22113	0.313026
YGR170W	YGR170W	33.4803	27.2693	1.22777	0.299177					YDR096W	YDR096W	36.4837	29.6331	1.23118	0.344209					YNL034W	YNL034W	35.4058	28.9965	1.22104	0.311163
YML107C	YML107C	33.9458	27.6485	1.22777	0.299173					YER163C	YER163C	36.346	29.5213	1.23118	0.3442					YBL015W	YBL015W	35.3085	28.9173	1.22102	0.31078
YNL091W	YNL091W	32.9088	26.8039	1.22776	0.299117					YGL131C	YGL131C	35.703	28.9998	1.23115	0.343619					YIL009C-A	YIL009C-A	37.0601	30.3523	1.221	0.310361
YPL159C	YPL159C	32.1726	26.2043	1.22776	0.299086					YER039C-A	YER039C-A	34.7151	28.199	1.23107	0.342246					YML007W	YML007W	37.1874	30.4567	1.22099	0.310303
YEL046C	YEL046C	34.7209	28.2801	1.22775	0.298865					YGR252W	YGR252W	35.0132	28.4417	1.23105	0.341873					YOR165W	YOR165W	37.8663	31.013	1.22098	0.310064
YEL009C	YEL009C	34.2384	27.8873	1.22774	0.298737					YKL071W	YKL071W	36.106	29.3295	1.23105	0.341794					YGL088W	YGL088W	35.9139	29.414	1.22098	0.310018
YKR052C	YKR052C	34.1666	27.8288	1.22774	0.298681					YJL216C	YJL216C	35.2919	28.6682	1.23105	0.341746					YNL093W	YNL093W	37.0596	30.3525	1.22097	0.30991
YDL180W	YDL180W	31.9292	26.0066	1.22774	0.29859					YDR370C	YDR370C	35.4367	28.7867	1.23101	0.341031					YLR200W	YLR200W	46.6815	38.2338	1.22095	0.309465
YMR139W	YMR139W	33.2398	27.0743	1.22773	0.298368					YLR443W	YLR443W	35.051	28.4739	1.23098	0.340553					YGR066C	YGR066C	35.0812	28.7342	1.22089	0.308233
YER096W	YER096W	34.5118	28.1114	1.22768	0.29748					YNL218W	YNL218W	35.4586	28.8068	1.23091	0.339143					YNL020C	YNL020C	34.0521	27.8915	1.22088	0.308113
YER045C	YER045C	35.5371	28.947	1.22766	0.297147					YDL142C	YDL142C	34.8174	28.286	1.23091	0.339078					YOR223W	YOR223W	37.1424	30.4235	1.22085	0.307448
YEL003W	YEL003W	35.8582	29.209	1.22764	0.296743					YGL227W	YGL227W	34.8558	28.3175	1.23089	0.338829					YGR239C	YGR239C	35.1185	28.7664	1.22082	0.30685
YEL072W	YEL072W	33.2128	27.0542	1.22764	0.296662					YOR285W	YOR285W	34.3207	27.8832	1.23088	0.3385					YMR040W	YMR040W	35.6408	29.1947	1.2208	0.306455
YIL096C	YIL096C	33.0897	26.954	1.22763	0.296544					YNR060W	YNR060W	35.1846	28.5854	1.23086	0.338154					YOR337W	YOR337W	34.9913	28.6629	1.22079	0.306292
YLL026W	YLL026W	34.8526	28.3904	1.22762	0.29627					YDR042C	YDR042C	35.9585	29.2142	1.23085	0.338088					YHR185C	YHR185C	35.8518	29.3682	1.22077	0.305944
YER116C	YER116C	34.7529	28.3114	1.22752	0.294371					YBR232C	YBR232C	36.5574	29.7014	1.23083	0.337679					YNR062C	YNR062C	34.7874	28.4969	1.22074	0.305459
YIL100W	YIL100W	32.5283	26.5007	1.22745	0.292939					YHR046C	YHR046C	35.7366	29.0363	1.23075	0.336194					YDR251W	YDR251W	36.342	29.7705	1.22074	0.305334
YBR281C	YBR281C	37.1384	30.2566	1.22745	0.292906					YNL203C	YNL203C	35.9466	29.2073	1.23074	0.335929					YLR136C	YLR136C	36.9618	30.2785	1.22073	0.305151
YLR246W	YLR246W	32.9707	26.8625	1.22739	0.291666					YPL246C	YPL246C	34.8572	28.3226	1.23072	0.335563					YLR450W	YLR450W	34.6734	28.4046	1.22069	0.304498
YBR168W	YBR168W	35.2621	28.7297	1.22737	0.291414					YPR023C	YPR023C	36.8457	29.9387	1.23071	0.335304					YGL037C	YGL037C	36.1635	29.6255	1.22069	0.304382
YFR032C	YFR032C	32.9814	26.8722	1.22734	0.290744					YDR195W	YDR195W	40.5795	32.973	1.23069	0.334973					YHR157W	YHR157W	36.7477	30.1042	1.22068	0.304238
YHR140W	YHR140W	34.0824	27.7694	1.22734	0.29069					YAL066W	YAL066W	35.7274	29.0317	1.23064	0.333968					YKR018C	YKR018C	40.6616	33.3113	1.22066	0.303768
YHR041C	YHR041C	34.789	28.3456	1.22732	0.290247					YIL117C	YIL117C	35.7649	29.0622	1.23063	0.333922					YOR225W	YOR225W	35.8344	29.3567	1.22066	0.303764
YLR040C	YLR040C	34.078	27.7673	1.22727	0.289368					YNL339C	YNL339C	35.0402	28.474	1.2306	0.333339					YPL060W	YPL060W	36.7962	30.1447	1.22065	0.303669
YLR165C	YLR165C	33.6395	27.4102	1.22726	0.289172					YGL250W	YGL250W	34.4599	28.0028	1.23059	0.333054					YER108C	YER108C	36.5041	29.9058	1.22064	0.303387
YPL026C	YPL026C	31.0346	25.2881	1.22724	0.288813					YBR172C	YBR172C	42.6337	34.6463	1.23054	0.3322					YBL042C	YBL042C	36.1274	29.5988	1.22057	0.302053
YDL171C	YDL171C	34.2227	27.8879	1.22715	0.287009					YKL003C	YKL003C	35.8077	29.0998	1.23051	0.33167					YIL057C	YIL057C	37.2139	30.4895	1.22055	0.301643
YER121W	YER121W	33.3705	27.196	1.22704	0.284768					YNL191W	YNL191W	35.3078	28.6942	1.23049	0.331158					YDR389W	YDR389W	37.4029	30.6451	1.22051	0.30101
YDL113C	YDL113C	30.7206	25.0367	1.22703	0.284496					YBR290W	YBR290W	35.7112	29.0221	1.23049	0.331111					YEL011W	YEL011W	35.872	29.391	1.22051	0.300899
YLR431C	YLR431C	32.3536	26.3676	1.22702	0.284413					YBR158W	YBR158W	38.6446	31.4064	1.23047	0.330851					YEL040W	YEL040W	37.4851	30.7145	1.22044	0.299495
YGR256W	YGR256W	34.0397	27.7418	1.22702	0.284373					YKL040C	YKL040C	37.0839	30.1383	1.23046	0.3306					YDR100W	YDR100W	35.8326	29.361	1.22042	0.299075
YER030W	YER030W	33.9185	27.6433	1.22701	0.284116					YLR461W	YLR461W	35.9038	29.1801	1.23042	0.329853					YER016W	YER016W	37.4018	30.6479	1.22037	0.298194
YLR236C	YLR236C	32.4926	26.4824	1.22695	0.283022					YIR037W	YIR037W	37.4933	30.472	1.23042	0.329822					YHR082C	YHR082C	35.9226	29.4364	1.22035	0.297738
YKL106W	YKL106W	32.21	26.2524	1.22694	0.282766					YIL130W	YIL130W	35.5795	28.9171	1.2304	0.329473					YHR111W	YHR111W	38.2641	31.3563	1.2203	0.296882
YMR130W	YMR130W	32.5565	26.5362	1.22687	0.281471					YOR238W	YOR238W	36.8454	29.9463	1.23038	0.329175					YNL035C	YNL035C	35.2837	28.9141	1.2203	0.296737
YIL030C	YIL030C	32.5496	26.5315	1.22683	0.280633					YMR161W	YMR161W	35.1309	28.553	1.23037	0.329012					YLR407W	YLR407W	38.8133	31.8072	1.22027	0.296256
YMR135C	YMR135C	34.1162	27.8089	1.22681	0.280217					YLL045C	YLL045C	35.6381	28.9653	1.23037	0.328969					YGR236C	YGR236C	37.4436	30.6847	1.22027	0.296201
YBR245C	YBR245C	34.9961	28.5265	1.22679	0.279871					YGR059W	YGR059W	35.7819	29.0824	1.23036	0.328827					YLR446W	YLR446W	36.1557	29.6295	1.22026	0.296065
YJL003W	YJL003W	33.026	26.9213	1.22676	0.279293					YMR138W	YMR138W	35.596	28.9316	1.23035	0.328556					YER032W	YER032W	38.8885	31.8693	1.22025	0.295855
YDR360W	YDR360W	34.868	28.4241	1.2267	0.278127					YDR055W	YDR055W	36.0321	29.2865	1.23033	0.328214					YGR135W	YGR135W	36.3808	29.8145	1.22024	0.295639
YOL006C	YOL006C	31.5807	25.7445	1.2267	0.277989					YMR193W	YMR193W	33.9842	27.622	1.23033	0.328195					YNL135C	YNL135C	37.3828	30.636	1.22022	0.295319
YHR163W	YHR163W	35.452	28.9009	1.22668	0.277562					YEL050C	YEL050C	35.5121	28.8644	1.23031	0.32771					YEL053C	YEL053C	36.6263	30.0169	1.22019	0.29468
YDR538W	YDR538W	32.1337	26.1958	1.22667	0.277505					YNL241C	YNL241C	35.8534	29.142	1.2303	0.327641					YLR394W	YLR394W	35.6455	29.2135	1.22017	0.294308
YOR052C	YOR052C	34.7605	28.3379	1.22665	0.276972					YJL047C	YJL047C	36.9814	30.0588	1.2303	0.327639					YHR163W	YHR163W	37.8592	31.0278	1.22017	0.2943
YPL156C	YPL156C	32.8835	26.8079	1.22663	0.276745					YIL146C	YIL146C	36.5589	29.7167	1.23025	0.326614					YBR298C	YBR298C	39.3789	32.2736	1.22016	0.294039
YDL001W	YDL001W	34.403	28.0468	1.22663	0.276657					YER096W	YER096W	35.684	29.0057	1.23024	0.326526					YEL071W	YEL071W	36.14	29.6205	1.2201	0.292969
YLL029W	YLL029W	33.5447	27.3471	1.22663	0.276629					YOR360C	YOR360C	37.994	30.8838	1.23023	0.326211					YHR009C	YHR009C	37.4361	30.683	1.22009	0.292779
YHR096C	YHR096C	33.0133	26.9141	1.22662	0.276382					YAL062W	YAL062W	35.6768	29.0011	1.23019	0.325499					YBR289W	YBR289W	36.0547	29.5509	1.22009	0.292666
YGR100W	YGR100W	33.4203	27.246	1.22661	0.276336					YML121W	YML121W	34.9749	28.4309	1.23017	0.325184					YDR346C	YDR346C	36.1951	29.6664	1.22007	0.292357
YGL051W	YGL051W	34.4176	28.0602	1.22656	0.275367					YGR281W	YGR281W	35.8051	29.1059	1.23017	0.325072					YDR490C	YDR490C	36.8729	30.222	1.22007	0.292308
YHR146W	YHR146W	36.0221	29.3687	1.22655	0.27504					YML096W	YML096W	37.9926	30.8844	1.23016	0.324916					YNL196C	YNL196C	35.5424	29.1321	1.22004	0.291852
YFR036W	YFR036W	32.2208	26.2704	1.2265	0.274165					YJL170C	YJL170C	34.4419	27.9989	1.23011	0.324074					YNL160W	YNL160W	35.2151	28.8642	1.22003	0.291489
YBL003C	YBL003C	33.9558	27.6861	1.22645	0.273191					YDR369C	YDR369C	40.0702	32.576	1.23005	0.322921					YIL002C	YIL002C	36.7205	30.0984	1.22001	0.291293
YGL089C	YGL089C	33.304	27.1559	1.2264	0.272126					YER108C	YER108C	36.9781	30.0625	1.23004	0.322685					YNL213C	YNL213C	33.9074	27.7937	1.21997	0.290388
YBR297W	YBR297W	36.0273	29.3767	1.22639	0.271935					YDL088C	YDL088C	35.6	28.9435	1.22999	0.321668					YBR210W	YBR210W	34.3985	28.1971	1.21993	0.289624
YLR460C	YLR460C	33.7414	27.5133	1.22637	0.271459					YER010C	YER010C	34.7602	28.261	1.22997	0.321386					YCR089W	YCR089W	35.2248	28.8751	1.2199	0.289087
YGR235C	YGR235C	34.6268	28.2356	1.22635	0.271139					YGL138C	YGL138C	35.6826	29.0111	1.22996	0.32123					YDL169C	YDL169C	35.5277	29.1236	1.21989	0.288885
YLR394W	YLR394W	33.8774	27.6254	1.22631	0.270401					YNL115C	YNL115C	35.3971	28.7808	1.22989	0.319806					YCL016C	YCL016C	42.2471	34.6319	1.21989	0.288877
YIR025W	YIR025W	34.0151	27.7381	1.2263	0.27008					YEL046C	YEL046C	38.3609	31.1912	1.22986	0.31932					YER145C	YER145C	35.972	29.488	1.21989	0.288813
YPL241C	YPL241C	35.7625	29.1635	1.22628	0.269653					YHR005C	YHR005C	36.9549	30.0481	1.22986	0.319294					YGR067C	YGR067C	35.9241	29.4502	1.21982	0.287599
YDR463W	YDR463W	34.3713	28.0294	1.22626	0.269339					YJL197W	YJL197W	34.4681	28.0261	1.22986	0.319239					YNL139C	YNL139C	44.7603	36.6941	1.21982	0.287553
YAR035W	YAR035W	33.0281	26.9343	1.22625	0.269044					YKR034W	YKR034W	34.8004	28.2975	1.22981	0.318251					YKR041W	YKR041W	35.4357	29.051	1.21977	0.286617
YDR344C	YDR344C	33.5223	27.3379	1.22622	0.268523					YHL022C	YHL022C	35.7469	29.0678	1.22978	0.31773					YDR293C	YDR293C	37.5809	30.8103	1.21975	0.286205
YMR127C	YMR127C	33.8838	27.6333	1.22619	0.268024					YBR280C	YBR280C	36.5236	29.6997	1.22977	0.317498					YJL176C	YJL176C	37.2976	30.5787	1.21972	0.285654
YNL275W	YNL275W	32.9745	26.8922	1.22617	0.267595					YHL009C	YHL009C	35.4217	28.8039	1.22976	0.317297					YDL127W	YDL127W	37.0526	30.378	1.21972	0.285541
YMR011W	YMR011W	34.4044	28.0586	1.22616	0.267448					YKR041W	YKR041W	35.54	28.9004	1.22974	0.317058					YDL187C	YDL187C	36.284	29.7483	1.2197	0.285161
YJR154W	YJR154W	32.8098	26.7586	1.22614	0.266904					YEL071W	YEL071W	36.3578	29.5659	1.22972	0.316659					YOR086C	YOR086C	36.7472	30.1296	1.21964	0.28396
YHR126C	YHR126C	33.907	27.6538	1.22612	0.266597					YDR490C	YDR490C	35.7623	29.0824	1.22969	0.316049					YOR163W	YOR163W	36.662	30.0603	1.21962	0.283527
YDR093W	YDR093W	34.3174	27.9886	1.22612	0.266556					YKR052C	YKR052C	35.4789	28.8538	1.22961	0.31447					YDR055W	YDR055W	35.9291	29.4596	1.21961	0.283394
YNL095C	YNL095C	33.693	27.4803	1.22608	0.265783					YKL103C	YKL103C	37.25	30.2957	1.22955	0.313356					YDR358W	YDR358W	35.9437	29.4717	1.2196	0.283262
YDL214C	YDL214C	33.1753	27.058	1.22608	0.265764					YBR300C	YBR300C	36.1648	29.4139	1.22951	0.312722					YGR061C	YGR061C	36.2561	29.7297	1.21952	0.281749
YDL089W	YDL089W	33.4918	27.3175	1.22602	0.264631					YGL071W	YGL071W	37.1238	30.1959	1.22943	0.311121					YNL125C	YNL125C	35.0766	28.763	1.2195	0.281322
YKL205W	YKL205W	35.4513	28.9157	1.22602	0.264581					YGR110W	YGR110W	35.6823	29.0235	1.22943	0.311087					YLL023C	YLL023C	36.0911	29.596	1.21946	0.28047
YPR134W	YPR134W	31.9396	26.0517	1.22601	0.264334					YEL065W	YEL065W	36.8887	30.005	1.22942	0.310906					YBL003C	YBL003C	36.4427	29.8844	1.21945	0.28038
YER075C	YER075C	33.5729	27.3855	1.22594	0.262994					YJR059W	YJR059W	36.3438	29.5624	1.22939	0.310464					YDR541C	YDR541C	35.6687	29.2504	1.21943	0.279873
YBR012C	YBR012C	33.9793	27.717	1.22594	0.262906					YGR129W	YGR129W	36.2218	29.4636	1.22937	0.310084					YCR083W	YCR083W	35.7525	29.3199	1.21939	0.279225
YNL211C	YNL211C	32.3654	26.4009	1.22592	0.262581					YJL078C	YJL078C	36.5258	29.711	1.22937	0.309939					YNL029C	YNL029C	35.4811	29.0975	1.21939	0.279087
YLR382C	YLR382C	31.5089	25.7024	1.22591	0.262496					YER090W	YER090W	35.6165	28.9724	1.22933	0.309191					YER039C-A	YER039C-A	34.713	28.4688	1.21933	0.278072
YLL032C	YLL032C	34.8139	28.3984	1.22591	0.262365					YMR036C	YMR036C	37.4726	30.4823	1.22932	0.309153					YER060W-A	YER060W-A	36.4486	29.8935	1.21928	0.277092
YKL008C	YKL008C	33.3787	27.2277	1.22591	0.262359					YDR340W	YDR340W	36.9268	30.0396	1.22927	0.308164					YDL142C	YDL142C	35.1012	28.7884	1.21928	0.277047
YER134C	YER134C	34.4853	28.1305	1.2259	0.262295					YMR127C	YMR127C	36.4836	29.6796	1.22925	0.307662					YAR047C	YAR047C	37.0565	30.3934	1.21923	0.276024
YNL205C	YNL205C	32.2386	26.299	1.22585	0.261178					YJL098W	YJL098W	36.5271	29.7151	1.22924	0.307638					YOR200W	YOR200W	35.0471	28.7453	1.21923	0.275984
YEL049W	YEL049W	33.5744	27.3892	1.22583	0.260754					YOL093W	YOL093W	39.0407	31.7602	1.22923	0.307435					YNL291C	YNL291C	36.8831	30.2516	1.21921	0.27568
YHR015W	YHR015W	33.5157	27.3418	1.2258	0.260315					YGR242W	YGR242W	36.6128	29.7863	1.22918	0.306505					YGR192C	YGR192C	37.2665	30.5676	1.21915	0.274445
YGR121C	YGR121C	32.7009	26.6774	1.22579	0.260088					YNR010W	YNR010W	42.6453	34.6962	1.22911	0.305002					YNL071W	YNL071W	34.4086	28.2238	1.21913	0.274166
YOL030W	YOL030W	33.8822	27.6411	1.22579	0.259976					YER177W	YER177W	34.7143	28.2444	1.22907	0.304325					YLR079W	YLR079W	36.0081	29.536	1.21913	0.273998
YER039C-A	YER039C-A	32.9425	26.8748	1.22578	0.259776					YGR042W	YGR042W	35.5682	28.9393	1.22906	0.304177					YKR061W	YKR061W	36.5614	29.9899	1.21912	0.273965
YOR221C	YOR221C	34.6174	28.2414	1.22577	0.259602					YKR065C	YKR065C	35.0939	28.5544	1.22902	0.303385					YHR073W	YHR073W	38.3063	31.4224	1.21907	0.272999
YDR154C	YDR154C	32.6882	26.6678	1.22576	0.259333					YPR067W	YPR067W	35.1652	28.6124	1.22902	0.303362					YJL105W	YJL105W	37.0625	30.4022	1.21907	0.272998
YNL128W	YNL128W	33.6526	27.4552	1.22573	0.258797					YLL048C	YLL048C	35.6491	29.0061	1.22902	0.303355					YGR110W	YGR110W	35.2358	28.9042	1.21906	0.272644
YDR347W	YDR347W	33.6674	27.4678	1.2257	0.258272					YLR422W	YLR422W	37.3322	30.3762	1.229	0.302949					YER002W	YER002W	36.0985	29.6119	1.21905	0.272584
YJR059W	YJR059W	33.6161	27.4264	1.22569	0.25794					YPL031C	YPL031C	36.7952	29.9397	1.22898	0.302553					YBR199W	YBR199W	36.2513	29.7375	1.21904	0.272421
YOR251C	YOR251C	33.5048	27.3359	1.22567	0.257635					YOR221C	YOR221C	35.6355	28.9994	1.22883	0.29985					YOR147W	YOR147W	35.9975	29.5294	1.21904	0.272305
YOR154W	YOR154W	33.4683	27.3068	1.22564	0.25707					YLR028C	YLR028C	35.7079	29.0592	1.2288	0.29924					YBR168W	YBR168W	37.9062	31.0977	1.21894	0.270371
YNL082W	YNL082W	34.4257	28.0889	1.2256	0.256257					YIL036W	YIL036W	35.761	29.1024	1.2288	0.299164					YOR084W	YOR084W	36.0037	29.5379	1.2189	0.269566
YCR065W	YCR065W	34.0191	27.7573	1.22559	0.25606					YHR137W	YHR137W	36.0677	29.3525	1.22878	0.298824					YJL101C	YJL101C	37.0003	30.3555	1.2189	0.26956
YGR019W	YGR019W	37.5755	30.6596	1.22557	0.255725					YLR136C	YLR136C	37.2532	30.3174	1.22877	0.298731					YEL014C	YEL014C	36.1603	29.6673	1.21886	0.268899
YLR038C	YLR038C	32.0494	26.1513	1.22554	0.255033					YHR086W	YHR086W	35.8053	29.1395	1.22875	0.29837					YCR087C-A	YCR087C-A	38.8298	31.8574	1.21886	0.268882
YBR264C	YBR264C	32.5179	26.5338	1.22553	0.254895					YIL058W	YIL058W	34.5937	28.154	1.22873	0.297881					YHR161C	YHR161C	34.5788	28.371	1.21881	0.267847
YHR049W	YHR049W	33.4798	27.3193	1.2255	0.254341					YMR006C	YMR006C	35.211	28.6572	1.22869	0.297231					YGR143W	YGR143W	35.7545	29.3357	1.21881	0.267804
YGR053C	YGR053C	32.2814	26.3417	1.22549	0.254052					YNL285W	YNL285W	34.608	28.1666	1.22869	0.297114					YIL072W	YIL072W	35.2058	28.8864	1.21877	0.267042
YIL130W	YIL130W	33.1892	27.0828	1.22547	0.25376					YBR221C	YBR221C	36.2794	29.5271	1.22868	0.296943					YDL130W-A	YDL130W-A	35.1009	28.8005	1.21876	0.266862
YBR037C	YBR037C	31.6644	25.8387	1.22547	0.253582					YGR127W	YGR127W	35.8016	29.1388	1.22866	0.296489					YLL060C	YLL060C	36.2321	29.7295	1.21872	0.266194
YHR033W	YHR033W	34.9428	28.5141	1.22546	0.253437					YIL059C	YIL059C	34.647	28.1999	1.22862	0.295869					YHR202W	YHR202W	36.9249	30.2989	1.21869	0.265489
YLL048C	YLL048C	33.6464	27.4566	1.22544	0.253013					YER037W	YER037W	38.1098	31.0191	1.22859	0.295317					YBL065W	YBL065W	37.0511	30.4024	1.21869	0.265481
YNL218W	YNL218W	32.8606	26.8156	1.22543	0.252852					YJR025C	YJR025C	35.4274	28.8359	1.22859	0.295199					YDR446W	YDR446W	35.6523	29.2553	1.21866	0.264956
YER163C	YER163C	33.8628	27.6341	1.2254	0.252332					YOR226C	YOR226C	36.4268	29.6504	1.22854	0.294389					YJL199C	YJL199C	35.0765	28.7834	1.21864	0.264498
YOR065W	YOR065W	32.3714	26.4175	1.22538	0.251856					YLR133W	YLR133W	35.4908	28.8892	1.22852	0.293879					YNL249C	YNL249C	35.3651	29.021	1.2186	0.263874
YJL063C	YJL063C	33.9516	27.7073	1.22537	0.251636					YLR439W	YLR439W	35.5507	28.9382	1.2285	0.293648					YNL134C	YNL134C	35.7991	29.3771	1.2186	0.263873
YNL135C	YNL135C	34.5611	28.2056	1.22533	0.250808					YPL027W	YPL027W	36.7093	29.8826	1.22845	0.292659					YBR005W	YBR005W	36.0739	29.6028	1.2186	0.263734
YOR001W	YOR001W	34.8063	28.4058	1.22532	0.250769					YER028C	YER028C	35.0854	28.562	1.22839	0.29153					YLR299W	YLR299W	35.7488	29.3364	1.21858	0.263419
YGL256W	YGL256W	33.9881	27.7389	1.22529	0.250034					YHR185C	YHR185C	35.2571	28.7021	1.22838	0.291299					YIR029W	YIR029W	37.32	30.6287	1.21846	0.261148
YOR171C	YOR171C	33.5532	27.3843	1.22527	0.249795					YDR218C	YDR218C	35.6969	29.0605	1.22837	0.291015					YLR084C	YLR084C	36.6188	30.0539	1.21844	0.260653
YJL177W	YJL177W	31.6305	25.8153	1.22526	0.249501					YDR011W	YDR011W	37.5169	30.5421	1.22837	0.291012					YLL007C	YLL007C	35.1236	28.8271	1.21842	0.260372
YLR044C	YLR044C	34.3666	28.0487	1.22525	0.249322					YDR154C	YDR154C	36.2751	29.5313	1.22836	0.290977					YNR001C	YNR001C	35.967	29.5197	1.21841	0.260018
YJL112W	YJL112W	32.4002	26.4445	1.22522	0.248632					YPL064C	YPL064C	35.7846	29.132	1.22836	0.29088					YOR384W	YOR384W	36.0796	29.6124	1.21839	0.25979
YEL050C	YEL050C	33.0303	26.9591	1.2252	0.248377					YGR275W	YGR275W	36.7394	29.9128	1.22822	0.288195					YMR121C	YMR121C	36.0947	29.6253	1.21837	0.259371
YGR130C	YGR130C	32.9325	26.8802	1.22516	0.247541					YGR028W	YGR028W	34.5401	28.1231	1.22818	0.287406					YDR192C	YDR192C	35.1126	28.8225	1.21824	0.256739
YBL031W	YBL031W	32.7978	26.7703	1.22515	0.2474					YCR024C	YCR024C	37.0796	30.1921	1.22812	0.286379					YKL086W	YKL086W	36.2772	29.7784	1.21824	0.256714
YNL302C	YNL302C	33.5878	27.4163	1.2251	0.246439					YDR192C	YDR192C	35.0925	28.5745	1.2281	0.286021					YCR102W-A	YCR102W-A	34.8117	28.5756	1.21823	0.256678
YER037W	YER037W	34.0105	27.7613	1.2251	0.246389					YER075C	YER075C	35.3721	28.8024	1.22809	0.285876					YOR062C	YOR062C	36.1241	29.653	1.21823	0.256512
YMR161W	YMR161W	33.4262	27.2847	1.22509	0.246174					YIL137C	YIL137C	35.5215	28.9254	1.22804	0.28483					YPR091C	YPR091C	36.4287	29.9037	1.2182	0.256021
YGR084C	YGR084C	32.7092	26.6995	1.22509	0.246065					YLR084C	YLR084C	36.6357	29.8342	1.22798	0.283629					YLR309C	YLR309C	36.0104	29.5606	1.21819	0.255786
YIL123W	YIL123W	32.3202	26.3829	1.22505	0.245274					YPL225W	YPL225W	37.2967	30.3725	1.22798	0.283628					YMR299C	YMR299C	37.5051	30.7881	1.21817	0.255445
YOR292C	YOR292C	32.756	26.7388	1.22503	0.245029					YMR110C	YMR110C	36.5613	29.7755	1.2279	0.28219					YNR025C	YNR025C	36.2317	29.7435	1.21814	0.254861
YER130C	YER130C	33.957	27.7193	1.22503	0.244975					YML062C	YML062C	36.3478	29.6029	1.22785	0.281195					YPL009C	YPL009C	36.3801	29.8659	1.21811	0.254345
YLR455W	YLR455W	35.201	28.7349	1.22503	0.244875					YPL206C	YPL206C	37.6372	30.6534	1.22783	0.280952					YHL009C	YHL009C	35.8375	29.4208	1.2181	0.254108
YDR354W	YDR354W	33.7373	27.5401	1.22502	0.244812					YMR037C	YMR037C	35.7376	29.1069	1.2278	0.280358					YOR171C	YOR171C	35.8246	29.4104	1.21809	0.253928
YHR032W	YHR032W	33.4846	27.3343	1.225	0.244422					YBL075C	YBL075C	35.4945	28.9103	1.22775	0.279336					YOL039W	YOL039W	36.2677	29.7742	1.21809	0.253906
YLL056C	YLL056C	34.3933	28.0763	1.225	0.244285					YLL038C	YLL038C	36.3673	29.6226	1.22769	0.278191					YER019C-A	YER019C-A	36.3376	29.8319	1.21808	0.253677
YLR309C	YLR309C	33.0489	26.9794	1.22497	0.243718					YMR279C	YMR279C	35.4053	28.84	1.22765	0.27742					YOR298C-A	YOR298C-A	34.8059	28.5763	1.218	0.252123
YGR248W	YGR248W	32.7593	26.744	1.22492	0.242749					YOR165W	YOR165W	38.2882	31.1885	1.22764	0.277214					YGR155W	YGR155W	35.7163	29.3238	1.218	0.252098
YNL220W	YNL220W	33.5505	27.3903	1.22491	0.242515					YPL265W	YPL265W	37.4175	30.4795	1.22763	0.277074					YHR184W	YHR184W	37.0313	30.4053	1.21792	0.250619
YNL283C	YNL283C	31.7141	25.8914	1.22489	0.242199					YNL157W	YNL157W	36.4702	29.708	1.22762	0.276964					YPL191C	YPL191C	36.5264	29.9908	1.21792	0.250562
YPL132W	YPL132W	32.517	26.5471	1.22488	0.241926					YPL259C	YPL259C	36.0282	29.348	1.22762	0.27692					YLR199C	YLR199C	36.4516	29.9295	1.21791	0.250468
YNR066C	YNR066C	32.1211	26.2239	1.22488	0.24192					YML076C	YML076C	35.5358	28.9469	1.22762	0.276901					YJR020W	YJR020W	36.4981	29.9689	1.21787	0.249549
YDR502C	YDR502C	32.764	26.7496	1.22484	0.241215					YPL236C	YPL236C	36.2966	29.5679	1.22757	0.275905					YER188W	YER188W	36.0229	29.5788	1.21787	0.249516
YDL079C	YDL079C	33.0534	26.9872	1.22478	0.239996					YNL284C	YNL284C	35.4789	28.902	1.22756	0.275771					YDR048C	YDR048C	35.6284	29.2553	1.21784	0.249068
YBL065W	YBL065W	33.5166	27.3659	1.22476	0.239507					YEL031W	YEL031W	37.6286	30.6535	1.22755	0.275544					YDR206W	YDR206W	36.2086	29.7322	1.21782	0.248664
YJR117W	YJR117W	30.7356	25.0954	1.22475	0.239397					YPL174C	YPL174C	35.8666	29.2183	1.22754	0.275371					YCR065W	YCR065W	36.0655	29.6148	1.21782	0.248634
YGL258W	YGL258W	32.6368	26.6493	1.22468	0.237965					YMR313C	YMR313C	36.0502	29.3679	1.22753	0.275295					YJL060W	YJL060W	34.9433	28.6942	1.21779	0.247955
YER056C-A	YER056C-A	34.8715	28.4753	1.22462	0.236906					YGL148W	YGL148W	36.0176	29.3415	1.22753	0.275208					YDR151C	YDR151C	36.9632	30.3536	1.21775	0.247341
YJL163C	YJL163C	34.5742	28.2328	1.22461	0.236698					YHL034C	YHL034C	35.8614	29.2146	1.22752	0.274951					YGR240C	YGR240C	35.7296	29.3407	1.21775	0.247202
YNL184C	YNL184C	32.2245	26.3142	1.2246	0.236529					YLR125W	YLR125W	35.5598	28.9689	1.22752	0.274947					YLR357W	YLR357W	44.3341	36.4094	1.21766	0.245439
YOL141W	YOL141W	32.2754	26.3561	1.22459	0.236276					YPL214C	YPL214C	37.3205	30.4035	1.22751	0.274775					YCR101C	YCR101C	35.987	29.5544	1.21765	0.245381
YBR007C	YBR007C	34.0265	27.7861	1.22459	0.236237					YCR076C	YCR076C	35.3302	28.782	1.22751	0.274773					YLL006W	YLL006W	37.4079	30.722	1.21763	0.244903
YBL071C	YBL071C	34.6522	28.2974	1.22457	0.235926					YGR040W	YGR040W	35.1713	28.6527	1.22751	0.274742					YKL110C	YKL110C	36.8013	30.2251	1.21758	0.243878
YBR169C	YBR169C	33.73	27.5445	1.22456	0.235703					YER176W	YER176W	36.9477	30.0999	1.2275	0.274674					YNL229C	YNL229C	42.7868	35.1423	1.21753	0.242976
YBR150C	YBR150C	33.4159	27.2883	1.22455	0.23543					YMR311C	YMR311C	36.4002	29.6547	1.22747	0.274021					YIL085C	YIL085C	35.1795	28.8942	1.21753	0.242965
YNL160W	YNL160W	33.1574	27.0772	1.22455	0.235408					YMR174C	YMR174C	36.6663	29.8718	1.22745	0.273751					YHR181W	YHR181W	33.7635	27.7339	1.21741	0.240675
YOL124C	YOL124C	35.7431	29.1898	1.2245	0.234534					YHR049W	YHR049W	36.1984	29.4911	1.22744	0.273454					YOR170W	YOR170W	37.2813	30.6235	1.21741	0.240669
YKL216W	YKL216W	30.2876	24.735	1.22448	0.234121					YHR125W	YHR125W	35.9093	29.256	1.22741	0.273017					YGL062W	YGL062W	35.8943	29.4842	1.21741	0.240626
YPR149W	YPR149W	33.9583	27.7341	1.22442	0.232942					YDR528W	YDR528W	37.143	30.2613	1.22741	0.272877					YGL228W	YGL228W	35.1455	28.8697	1.21738	0.240141
YNL119W	YNL119W	34.45	28.1358	1.22442	0.23291					YLL056C	YLL056C	36.5649	29.7906	1.2274	0.272705					YPL270W	YPL270W	36.1628	29.7054	1.21738	0.240124
YNR025C	YNR025C	34.0766	27.8315	1.22439	0.232315					YJL199C	YJL199C	35.4382	28.8731	1.22738	0.272293					YNL129W	YNL129W	37.8251	31.071	1.21738	0.24
YDL013W	YDL013W	33.3049	27.2014	1.22438	0.232116					YNL117W	YNL117W	35.0232	28.536	1.22734	0.271517					YJL118W	YJL118W	35.4887	29.1529	1.21733	0.239129
YHR115C	YHR115C	33.3087	27.2045	1.22438	0.232088					YBR210W	YBR210W	34.556	28.1554	1.22733	0.271407					YOR184W	YOR184W	36.5355	30.0138	1.21729	0.238282
YPL006W	YPL006W	33.5909	27.4352	1.22437	0.231957					YCR060W	YCR060W	36.1654	29.467	1.22732	0.271227					YGR193C	YGR193C	36.2282	29.7615	1.21728	0.238224
YHR162W	YHR162W	32.3029	26.3839	1.22434	0.231331					YIL065C	YIL065C	38.2572	31.1717	1.22731	0.270975					YBR245C	YBR245C	37.3217	30.6601	1.21727	0.237952
YGR240C	YGR240C	33.8463	27.6449	1.22432	0.230952					YGL146C	YGL146C	35.85	29.2106	1.2273	0.270772					YOR003W	YOR003W	36.3643	29.8742	1.21725	0.237508
YER180C	YER180C	34.2176	27.9482	1.22432	0.230921					YLR450W	YLR450W	34.3112	27.9579	1.22725	0.269828					YLR432W	YLR432W	35.5569	29.2116	1.21722	0.236943
YDL202W	YDL202W	31.6417	25.8443	1.22432	0.230914					YBR156C	YBR156C	35.471	28.9032	1.22723	0.269598					YER077C	YER077C	35.1794	28.9022	1.21718	0.236285
YDL094C	YDL094C	31.763	25.9437	1.22431	0.230619					YPR149W	YPR149W	36.3228	29.5979	1.22721	0.269076					YGL010W	YGL010W	35.8564	29.4587	1.21718	0.236103
YNR005C	YNR005C	33.592	27.4376	1.2243	0.230565					YJR082C	YJR082C	34.9728	28.4984	1.22719	0.268718					YKL103C	YKL103C	36.762	30.2027	1.21717	0.236089
YLR257W	YLR257W	31.8897	26.0475	1.22429	0.230329					YGL154W	YGL154W	35.0373	28.553	1.2271	0.267038					YDL201W	YDL201W	36.4076	29.912	1.21716	0.235782
YJL192C	YJL192C	33.6648	27.4981	1.22426	0.229742					YKR009C	YKR009C	35.5936	29.0075	1.22705	0.266075					YDR165W	YDR165W	34.8008	28.5925	1.21713	0.23524
YFR017C	YFR017C	36.2264	29.5908	1.22424	0.229382					YIR024C	YIR024C	35.6419	29.0491	1.22695	0.264319					YNR065C	YNR065C	35.1776	28.9029	1.21709	0.234517
YCR066W	YCR066W	35.784	29.2295	1.22424	0.229377					YKL086W	YKL086W	36.7549	29.9565	1.22694	0.264072					YDR370C	YDR370C	35.779	29.3977	1.21707	0.234036
YGR234W	YGR234W	34.1572	27.9015	1.22421	0.22861					YCR105W	YCR105W	35.7612	29.1466	1.22694	0.264066					YHR198C	YHR198C	36.563	30.0419	1.21707	0.234016
YEL031W	YEL031W	34.168	27.9105	1.2242	0.228496					YMR025W	YMR025W	37.4155	30.495	1.22694	0.264009					YBR030W	YBR030W	35.3017	29.0056	1.21707	0.233984
YDR535C	YDR535C	33.4455	27.3205	1.22419	0.22834					YER051W	YER051W	35.8242	29.1993	1.22689	0.26303					YCL005W	YCL005W	42.7111	35.0958	1.21698	0.23237
YGR132C	YGR132C	32.1558	26.2676	1.22416	0.227754					YNL095C	YNL095C	35.8575	29.2265	1.22688	0.262967					YJR148W	YJR148W	35.5275	29.1932	1.21698	0.232256
YBR044C	YBR044C	35.4724	28.9772	1.22415	0.227486					YOR049C	YOR049C	36.7133	29.9246	1.22686	0.262489					YKL008C	YKL008C	34.9246	28.6984	1.21695	0.231804
YMR257C	YMR257C	31.7485	25.9353	1.22415	0.22742					YNL242W	YNL242W	37.3622	30.4536	1.22686	0.262479					YPL041C	YPL041C	37.5354	30.8439	1.21695	0.231694
YBL083C	YBL083C	33.7317	27.5554	1.22414	0.22732					YLR332W	YLR332W	37.2497	30.3629	1.22682	0.261752					YCR076C	YCR076C	35.2825	28.9931	1.21693	0.231328
YDL222C	YDL222C	34.0816	27.8418	1.22411	0.226821					YLL053C	YLL053C	36.2738	29.5679	1.2268	0.261349					YNL236W	YNL236W	35.0302	28.7858	1.21692	0.231219
YMR160W	YMR160W	32.3518	26.4296	1.22407	0.225986					YOR200W	YOR200W	34.6843	28.2724	1.22679	0.261208					YDR078C	YDR078C	34.669	28.4897	1.2169	0.230695
YIR018W	YIR018W	34.1927	27.9336	1.22407	0.225892					YHR184W	YHR184W	36.8393	30.0292	1.22678	0.261098					YIL133C	YIL133C	34.5639	28.4034	1.21689	0.230594
YMR102C	YMR102C	33.9971	27.7743	1.22405	0.225519					YPL026C	YPL026C	34.2824	27.9451	1.22678	0.260976					YMR173W	YMR173W	35.8579	29.4672	1.21687	0.230246
YKR065C	YKR065C	32.7613	26.7651	1.22403	0.225132					YNR062C	YNR062C	34.7297	28.3099	1.22677	0.260838					YOR175C	YOR175C	37.9167	31.1592	1.21687	0.230194
YJR091C	YJR091C	33.1782	27.1062	1.22401	0.224663					YJL100W	YJL100W	34.5994	28.2039	1.22676	0.260659					YCR034W	YCR034W	40.7917	33.5227	1.21684	0.229575
YER016W	YER016W	34.598	28.2666	1.22399	0.224258					YOR019W	YOR019W	36.8232	30.0168	1.22675	0.260533					YOR008C-A	YOR008C-A	35.2396	28.9602	1.21683	0.229383
YCR024C-A	YCR024C-A	36.9354	30.1773	1.22395	0.223526					YDR446W	YDR446W	35.2274	28.7161	1.22675	0.260429					YAL065C	YAL065C	36.0404	29.6189	1.2168	0.228899
YNL056W	YNL056W	32.6707	26.6932	1.22394	0.223302					YPL224C	YPL224C	34.6551	28.2505	1.22671	0.259636					YPR184W	YPR184W	35.3839	29.0805	1.21676	0.228009
YGL227W	YGL227W	33.5728	27.4302	1.22394	0.223288					YJL105W	YJL105W	37.0388	30.1937	1.22671	0.259598					YLR040C	YLR040C	35.4344	29.1221	1.21675	0.22792
YML008C	YML008C	34.4238	28.1259	1.22392	0.222919					YNL125C	YNL125C	34.2739	27.9401	1.22669	0.259393					YPL259C	YPL259C	35.774	29.4015	1.21674	0.22766
YBR294W	YBR294W	32.8987	26.8805	1.22389	0.222324					YDR347W	YDR347W	36.2529	29.5544	1.22665	0.258544					YOR386W	YOR386W	34.6053	28.4426	1.21667	0.226311
YPL236C	YPL236C	35.2079	28.7676	1.22387	0.222003					YML035C	YML035C	35.3908	28.8517	1.22664	0.258458					YNR030W	YNR030W	36.1614	29.7225	1.21663	0.225574
YDL243C	YDL243C	32.3689	26.4487	1.22384	0.221274					YNL085W	YNL085W	36.8348	30.0297	1.22661	0.257856					YBR212W	YBR212W	35.3546	29.0599	1.21661	0.225116
YBR289W	YBR289W	33.4035	27.2944	1.22382	0.221021					YDL128W	YDL128W	35.3698	28.8356	1.2266	0.257667					YGR028W	YGR028W	34.7415	28.5562	1.2166	0.22499
YPL202C	YPL202C	34.4382	28.1402	1.22381	0.220702					YPL035C	YPL035C	35.2147	28.7098	1.22657	0.257135					YCR085W	YCR085W	39.5366	32.498	1.21659	0.224632
YGR086C	YGR086C	33.7637	27.5894	1.22379	0.220459					YLL001W	YLL001W	37.6716	30.7136	1.22654	0.256514					YJL172W	YJL172W	35.7685	29.4015	1.21655	0.224013
YAL039C	YAL039C	30.6219	25.0222	1.22379	0.22033					YCR082W	YCR082W	34.9642	28.5075	1.22649	0.255511					YPL006W	YPL006W	34.947	28.7266	1.21654	0.22367
YPL215W	YPL215W	32.0988	26.2296	1.22376	0.219869					YHR120W	YHR120W	35.0457	28.5744	1.22647	0.255194					YBR274W	YBR274W	35.2046	28.9386	1.21653	0.223472
YOR225W	YOR225W	33.6529	27.5	1.22374	0.219441					YMR054W	YMR054W	36.1575	29.4812	1.22646	0.254953					YHR178W	YHR178W	37.5756	30.8882	1.2165	0.223065
YDL124W	YDL124W	33.8278	27.6438	1.22371	0.21871					YHR115C	YHR115C	35.9748	29.3326	1.22644	0.254656					YIL090W	YIL090W	37.1539	30.5422	1.21648	0.222556
YGR007W	YGR007W	35.3909	28.9211	1.2237	0.218669					YBR295W	YBR295W	38.9336	31.746	1.22641	0.253963					YFR057W	YFR057W	35.6234	29.2845	1.21646	0.222189
YEL020C	YEL020C	34.1043	27.8711	1.22364	0.217506					YDR206W	YDR206W	35.8958	29.2693	1.2264	0.253758					YNL208W	YNL208W	35.3217	29.0383	1.21638	0.22073
YLR053C	YLR053C	34.8958	28.518	1.22364	0.217411					YCR024C-A	YCR024C-A	39.0338	31.8286	1.22638	0.253356					YNR012W	YNR012W	35.5196	29.2011	1.21638	0.220593
YGL138C	YGL138C	32.8462	26.8432	1.22363	0.21725					YLR044C	YLR044C	37.0006	30.1714	1.22635	0.252834					YDR336W	YDR336W	36.8262	30.2755	1.21637	0.22045
YHR073W	YHR073W	35.4793	28.9951	1.22363	0.217237					YGR287C	YGR287C	36.6826	29.9136	1.22629	0.251672					YOR012W	YOR012W	36.1802	29.7446	1.21636	0.220345
YNL169C	YNL169C	31.9513	26.1129	1.22359	0.216354					YGR213C	YGR213C	34.7057	28.3024	1.22625	0.250949					YHR154W	YHR154W	39.1246	32.1653	1.21636	0.220276
YDL127W	YDL127W	33.9597	27.7545	1.22357	0.216063					YPR076W	YPR076W	36.0647	29.4115	1.22621	0.250282					YKL204W	YKL204W	43.1407	35.4675	1.21634	0.219951
YNL008C	YNL008C	32.9636	26.9434	1.22344	0.213376					YLL042C	YLL042C	35.6339	29.0603	1.22621	0.250198					YGL071W	YGL071W	37.7878	31.0678	1.2163	0.219071
YHR139C	YHR139C	34.491	28.1933	1.22337	0.212147					YKL142W	YKL142W	35.5489	28.9912	1.2262	0.249978					YGR117C	YGR117C	35.5747	29.2487	1.21628	0.21877
YER049W	YER049W	34.3474	28.076	1.22337	0.212078					YDR430C	YDR430C	34.6376	28.2483	1.22619	0.24976					YNL087W	YNL087W	36.4947	30.0055	1.21627	0.218451
YDR247W	YDR247W	32.5399	26.5987	1.22337	0.211985					YNL194C	YNL194C	35.5867	29.0232	1.22615	0.249064					YDR263C	YDR263C	35.8073	29.4411	1.21623	0.217817
YEL011W	YEL011W	33.92	27.7268	1.22336	0.211916					YOR021C	YOR021C	37.2009	30.3398	1.22614	0.248916					YOR017W	YOR017W	36.5961	30.0907	1.21619	0.21703
YDR099W	YDR099W	32.9652	26.9464	1.22336	0.211869					YLR025W	YLR025W	37.6739	30.7256	1.22614	0.248894					YAL062W	YAL062W	36.2329	29.7923	1.21618	0.216813
YDL121C	YDL121C	33.7318	27.5731	1.22336	0.211813					YNL255C	YNL255C	40.7162	33.2069	1.22614	0.248848					YOR041C	YOR041C	36.3235	29.867	1.21618	0.216689
YNL052W	YNL052W	31.6095	25.8384	1.22336	0.211763					YLR304C	YLR304C	36.8103	30.0218	1.22612	0.248576					YOR061W	YOR061W	32.4894	26.7149	1.21616	0.216294
YDL237W	YDL237W	32.2138	26.333	1.22333	0.211177					YLR437C	YLR437C	35.3815	28.8567	1.22611	0.248382					YHR100C	YHR100C	35.5128	29.201	1.21615	0.21615
YBR232C	YBR232C	33.3924	27.2965	1.22332	0.21104					YER145C	YER145C	35.5655	29.007	1.2261	0.248156					YER091C	YER091C	36.676	30.1576	1.21615	0.216081
YDL130W-A	YDL130W-A	32.3777	26.4673	1.22331	0.210852					YLR172C	YLR172C	36.0944	29.4393	1.22606	0.247453					YJL192C	YJL192C	36.4109	29.9397	1.21614	0.215985
YOR285W	YOR285W	31.8715	26.0536	1.2233	0.210749					YKL093W	YKL093W	36.364	29.6607	1.226	0.246219					YOL018C	YOL018C	33.4561	27.5112	1.21609	0.214972
YMR038C	YMR038C	36.6017	29.921	1.22328	0.210262					YHR139C	YHR139C	36.3487	29.6489	1.22597	0.245725					YJL210W	YJL210W	35.1647	28.9165	1.21608	0.214771
YNL071W	YNL071W	32.288	26.3947	1.22328	0.210213					YMR194W	YMR194W	33.195	27.0767	1.22596	0.245521					YMR161W	YMR161W	34.8657	28.6707	1.21607	0.214691
YKR060W	YKR060W	33.3805	27.2893	1.22321	0.208837					YDL161W	YDL161W	36.3598	29.6584	1.22595	0.2454					YGL148W	YGL148W	36.4207	29.9497	1.21606	0.21446
YBR032W	YBR032W	33.2793	27.2068	1.2232	0.208716					YMR119W-A	YMR119W-A	35.6819	29.1069	1.22589	0.244199					YKR053C	YKR053C	35.4387	29.1422	1.21606	0.214413
YOR179C	YOR179C	33.6029	27.4713	1.2232	0.208683					YDR078C	YDR078C	33.4939	27.3226	1.22587	0.243715					YGL007W	YGL007W	36.7914	30.2549	1.21605	0.214197
YJL122W	YJL122W	33.5289	27.411	1.22319	0.208516					YJL060W	YJL060W	34.5421	28.1786	1.22583	0.242973					YDL216C	YDL216C	36.8474	30.301	1.21605	0.214189
YGL007W	YGL007W	34.9477	28.5712	1.22318	0.208261					YIL163C	YIL163C	34.6861	28.2962	1.22582	0.24286					YGL009C	YGL009C	35.6367	29.3058	1.21603	0.213809
YMR040W	YMR040W	32.9318	26.9235	1.22316	0.20794					YFR013W	YFR013W	35.5959	29.0397	1.22577	0.241862					YMR138W	YMR138W	35.4406	29.1451	1.21601	0.213383
YDR317W	YDR317W	35.2614	28.8283	1.22315	0.207699					YGL114W	YGL114W	36.6298	29.8831	1.22577	0.24186					YPR076W	YPR076W	35.7714	29.4172	1.216	0.213279
YDR370C	YDR370C	33.2914	27.2183	1.22312	0.207198					YJL196C	YJL196C	35.1953	28.713	1.22576	0.241728					YLL014W	YLL014W	37.6241	30.9411	1.21599	0.21309
YMR279C	YMR279C	33.6507	27.5122	1.22312	0.207099					YBR099C	YBR099C	35.3237	28.8191	1.2257	0.240678					YBL095W	YBL095W	35.1872	28.9377	1.21597	0.21258
YML028W	YML028W	37.3928	30.572	1.22311	0.20683					YLR356W	YLR356W	34.9504	28.5147	1.2257	0.240546					YBR028C	YBR028C	35.8946	29.5197	1.21595	0.212371
YNL254C	YNL254C	32.0999	26.2449	1.22309	0.206521					YPL006W	YPL006W	34.7642	28.3629	1.22569	0.240439					YMR057C	YMR057C	36.0266	29.6283	1.21595	0.212332
YKL194C	YKL194C	33.0007	26.9829	1.22303	0.205238					YGL243W	YGL243W	36.4768	29.7605	1.22568	0.240195					YDR270W	YDR270W	36.6956	30.1785	1.21595	0.212325
YPL272C	YPL272C	33.909	27.7256	1.22302	0.205161					YDL183C	YDL183C	38.5166	31.4251	1.22566	0.239907					YIR028W	YIR028W	35.8417	29.4771	1.21592	0.211615
YDR424C	YDR424C	33.5968	27.4718	1.22296	0.203898					YGR003W	YGR003W	35.1477	28.6766	1.22566	0.239754					YNL314W	YNL314W	35.6187	29.2954	1.21585	0.210331
YMR132C	YMR132C	32.5728	26.6345	1.22296	0.203859					YGR162W	YGR162W	37.2721	30.4103	1.22564	0.239479					YFR030W	YFR030W	37.0105	30.4401	1.21585	0.210287
YLR251W	YLR251W	34.8376	28.4865	1.22295	0.203823					YMR121C	YMR121C	35.3659	28.8552	1.22563	0.239317					YDR440W	YDR440W	37.0791	30.4972	1.21582	0.209754
YJL199C	YJL199C	33.3054	27.2344	1.22292	0.20305					YNR040W	YNR040W	35.7335	29.1562	1.22559	0.23849					YGR093W	YGR093W	35.3547	29.0795	1.2158	0.209287
YIL001W	YIL001W	31.9132	26.0961	1.22291	0.202988					YMR053C	YMR053C	36.2596	29.5861	1.22556	0.238015					YAL005C	YAL005C	34.5224	28.3952	1.21579	0.209089
YNL047C	YNL047C	34.1129	27.8951	1.2229	0.202757					YMR097C	YMR097C	33.363	27.2227	1.22556	0.237868					YJL116C	YJL116C	35.1732	28.931	1.21576	0.208625
YDR368W	YDR368W	33.7989	27.6384	1.2229	0.202713					YBR067C	YBR067C	36.4705	29.7588	1.22554	0.237485					YDL037C	YDL037C	35.8622	29.4978	1.21576	0.208571
YNL249C	YNL249C	31.7533	25.966	1.22288	0.202357					YCR020W-B	YCR020W-B	46.7598	38.1546	1.22553	0.237461					YLR262C	YLR262C	36.8403	30.3034	1.21572	0.207736
YER051W	YER051W	33.8049	27.644	1.22287	0.202092					YJL027C	YJL027C	34.9262	28.4994	1.22551	0.236919					YHR005C	YHR005C	36.8741	30.3314	1.21571	0.207543
YJR142W	YJR142W	32.8597	26.8723	1.22281	0.200947					YKR102W	YKR102W	37.058	30.2395	1.22548	0.236503					YLR133W	YLR133W	35.8795	29.5141	1.21567	0.206883
YGR070W	YGR070W	33.3197	27.2486	1.2228	0.200859					YMR173W	YMR173W	35.3013	28.8083	1.22539	0.234631					YDL118W	YDL118W	32.7169	26.9127	1.21567	0.206811
YOR062C	YOR062C	33.068	27.0442	1.22274	0.199538					YPR195C	YPR195C	34.9906	28.5553	1.22536	0.234183					YDR537C	YDR537C	35.5826	29.2701	1.21567	0.206752
YAL062W	YAL062W	33.4631	27.3676	1.22273	0.19933					YEL053C	YEL053C	36.509	29.7946	1.22536	0.234111					YOR135C	YOR135C	36.633	30.1347	1.21564	0.206297
YGR050C	YGR050C	31.8746	26.0685	1.22272	0.199236					YJL112W	YJL112W	35.1873	28.7161	1.22535	0.234005					YMR234W	YMR234W	37.0929	30.5131	1.21564	0.206246
YPL230W	YPL230W	33.471	27.3753	1.22267	0.198244					YML009C	YML009C	35.5169	28.9854	1.22534	0.233781					YAL004W	YAL004W	36.1724	29.756	1.21563	0.20613
YDR358W	YDR358W	33.839	27.6763	1.22267	0.198234					YDL089W	YDL089W	35.9437	29.3345	1.22531	0.233149					YBL046W	YBL046W	37.1199	30.536	1.21561	0.205761
YBR290W	YBR290W	31.9867	26.1613	1.22267	0.198219					YJR035W	YJR035W	36.5693	29.8456	1.22528	0.232693					YAL022C	YAL022C	35.8467	29.4888	1.21561	0.205584
YDR278C	YDR278C	34.2948	28.05	1.22263	0.19735					YMR056C	YMR056C	35.7998	29.2179	1.22527	0.232384					YPL220W	YPL220W	36.8955	30.3517	1.2156	0.205421
YLR262C	YLR262C	34.3361	28.0841	1.22262	0.19711					YNR058W	YNR058W	34.9492	28.5243	1.22524	0.231903					YMR135W-A	YMR135W-A	35.1585	28.923	1.21559	0.205294
YER185W	YER185W	33.9607	27.7772	1.22261	0.197034					YMR295C	YMR295C	35.5666	29.0283	1.22524	0.231829					YJL134W	YJL134W	35.4738	29.1827	1.21557	0.204976
YHR112C	YHR112C	33.1389	27.1051	1.22261	0.196992					YGR097W	YGR097W	35.0928	28.6418	1.22523	0.231739					YIL027C	YIL027C	36.4761	30.0076	1.21556	0.204702
YJL134W	YJL134W	32.4577	26.5486	1.22258	0.196377					YOR175C	YOR175C	37.9281	30.957	1.22518	0.230832					YOL015W	YOL015W	36.0164	29.6299	1.21554	0.204391
YER038W-A	YER038W-A	33.1475	27.1128	1.22258	0.196312					YJL192C	YJL192C	35.9461	29.3411	1.22511	0.229466					YGR250C	YGR250C	35.6893	29.361	1.21553	0.204208
YGL224C	YGL224C	33.7674	27.6206	1.22254	0.195616					YPR192W	YPR192W	36.1245	29.4869	1.22511	0.229339					YER090W	YER090W	35.695	29.3665	1.2155	0.203503
YLR326W	YLR326W	33.3629	27.29	1.22253	0.195414					YHR009C	YHR009C	37.0208	30.2192	1.22508	0.228793					YER027C	YER027C	38.1546	31.3901	1.2155	0.203497
YGL062W	YGL062W	33.3474	27.2778	1.22251	0.195025					YMR193C-A	YMR193C-A	34.0268	27.7753	1.22507	0.228714					YMR278W	YMR278W	35.6422	29.3232	1.21549	0.203434
YDR281C	YDR281C	34.3201	28.0736	1.22251	0.194932					YLR171W	YLR171W	35.5273	29.0004	1.22506	0.228514					YOR114W	YOR114W	36.4204	29.9636	1.21549	0.203272
YLR114C	YLR114C	32.5973	26.6649	1.22248	0.194438					YOR107W	YOR107W	36.8286	30.0632	1.22504	0.228055					YOR381W	YOR381W	36.3558	29.9107	1.21548	0.20316
YDL216C	YDL216C	33.9164	27.7446	1.22245	0.193828					YOR253W	YOR253W	35.7892	29.2153	1.22501	0.227623					YAL067C	YAL067C	36.0792	29.6834	1.21547	0.202861
YIL025C	YIL025C	34.1714	27.9534	1.22244	0.193684					YMR299C	YMR299C	38.1275	31.1252	1.22497	0.226809					YBR114W	YBR114W	36.0592	29.6677	1.21543	0.20227
YMR006C	YMR006C	32.515	26.5986	1.22243	0.193418					YNL031C	YNL031C	35.3538	28.861	1.22497	0.226734					YBR010W	YBR010W	36.7264	30.2167	1.21543	0.202247
YOR263C	YOR263C	35.0556	28.6771	1.22242	0.193262					YPR184W	YPR184W	35.5597	29.0297	1.22494	0.226286					YIL059C	YIL059C	34.7733	28.6098	1.21543	0.202243
YLR353W	YLR353W	31.8749	26.0754	1.22241	0.193127					YGL059W	YGL059W	34.7635	28.3797	1.22494	0.226266					YAL048C	YAL048C	36.2041	29.7882	1.21538	0.201279
YJR102C	YJR102C	33.2737	27.2197	1.22241	0.193095					YLR299W	YLR299W	34.9509	28.5329	1.22494	0.226117					YDR536W	YDR536W	35.8009	29.4576	1.21534	0.200406
YOR185C	YOR185C	35.9055	29.3739	1.22236	0.192042					YOR215C	YOR215C	35.0082	28.5798	1.22493	0.226046					YGL250W	YGL250W	35.3457	29.083	1.21534	0.200368
YNL203C	YNL203C	33.8947	27.7311	1.22226	0.190141					YBR057C	YBR057C	35.2239	28.756	1.22492	0.225854					YIL137C	YIL137C	35.8079	29.4639	1.21531	0.199899
YER077C	YER077C	33.5424	27.4431	1.22225	0.18991					YLR438W	YLR438W	35.634	29.0909	1.22492	0.225803					YAL012W	YAL012W	35.8096	29.4657	1.2153	0.199627
YOR050C	YOR050C	34.7582	28.438	1.22224	0.189749					YNL338W	YNL338W	35.8978	29.3066	1.2249	0.225495					YGL256W	YGL256W	36.4755	30.0151	1.21524	0.198422
YBL008W	YBL008W	35.5746	29.1065	1.22222	0.189311					YMR241W	YMR241W	35.0021	28.5759	1.22488	0.225107					YGR101W	YGR101W	36.133	29.7338	1.21522	0.198041
YLR064W	YLR064W	38.2429	31.2902	1.2222	0.188889					YBR114W	YBR114W	36.0148	29.4027	1.22488	0.225041					YPR071W	YPR071W	35.2863	29.0374	1.2152	0.197783
YGR236C	YGR236C	34.4775	28.2096	1.22219	0.188633					YML027W	YML027W	35.9103	29.3174	1.22488	0.225014					YER109C	YER109C	36.457	30.002	1.21515	0.196806
YHR009C	YHR009C	33.2767	27.2274	1.22218	0.188473					YPL072W	YPL072W	36.4848	29.7866	1.22487	0.224928					YEL060C	YEL060C	35.5025	29.2165	1.21515	0.196788
YDR306C	YDR306C	34.5623	28.2798	1.22216	0.188051					YIL090W	YIL090W	36.4242	29.7371	1.22487	0.22492					YLR437C	YLR437C	35.3626	29.1015	1.21515	0.196643
YHR132C	YHR132C	34.2212	28.001	1.22214	0.187679					YOL023W	YOL023W	34.3987	28.0841	1.22485	0.22448					YPL065W	YPL065W	37.1652	30.5851	1.21514	0.196571
YOR082C	YOR082C	32.3837	26.4982	1.22211	0.187094					YHR155W	YHR155W	36.5233	29.8193	1.22482	0.223919					YGR131W	YGR131W	34.0393	28.013	1.21513	0.196269
YJL116C	YJL116C	32.5344	26.6218	1.2221	0.186831					YBR294W	YBR294W	35.5079	28.9906	1.22481	0.223698					YKR074W	YKR074W	36.0887	29.6997	1.21512	0.196197
YGL219C	YGL219C	32.7256	26.7786	1.22208	0.186471					YNL220W	YNL220W	35.1818	28.7266	1.22471	0.221929					YNL191W	YNL191W	35.3964	29.1302	1.21511	0.196002
YJL171C	YJL171C	33.8721	27.7168	1.22208	0.186459					YDL180W	YDL180W	35.318	28.838	1.2247	0.221728					YDR348C	YDR348C	36.7876	30.2754	1.2151	0.195781
YNL291C	YNL291C	33.6619	27.5458	1.22203	0.185596					YER054C	YER054C	36.4341	29.7494	1.2247	0.221706					YCR059C	YCR059C	36.0298	29.6519	1.21509	0.195601
YGR001C	YGR001C	33.3131	27.2605	1.22203	0.185507					YKR046C	YKR046C	35.0636	28.6308	1.22468	0.221349					YLL015W	YLL015W	37.2417	30.6493	1.21509	0.195536
YGR017W	YGR017W	33.5894	27.487	1.22201	0.18513					YCR053W	YCR053W	35.9384	29.3458	1.22465	0.220748					YNL144C	YNL144C	36.069	29.6846	1.21507	0.195249
YOR316C	YOR316C	30.9568	25.3327	1.22201	0.185074					YNL077W	YNL077W	35.7226	29.1697	1.22464	0.220626					YMR021C	YMR021C	35.9274	29.5684	1.21506	0.19499
YNR060W	YNR060W	33.0505	27.0462	1.222	0.184983					YNL223W	YNL223W	36.1839	29.5465	1.22464	0.220522					YMR007W	YMR007W	34.7503	28.6012	1.21499	0.193696
YIL070C	YIL070C	32.813	26.8528	1.22196	0.184106					YKL070W	YKL070W	37.4764	30.6022	1.22463	0.220358					YMR237W	YMR237W	38.679	31.8355	1.21496	0.193129
YPL223C	YPL223C	33.6777	27.5605	1.22196	0.184029					YDL206W	YDL206W	35.7395	29.1841	1.22462	0.220208					YPL246C	YPL246C	35.4724	29.1963	1.21496	0.193044
YPL165C	YPL165C	34.9648	28.6143	1.22193	0.18356					YCR087C-A	YCR087C-A	38.727	31.6238	1.22462	0.220087					YJL013C	YJL013C	36.039	29.6631	1.21494	0.192705
YER164W	YER164W	33.5639	27.4687	1.22189	0.182787					YBR301W	YBR301W	36.4048	29.7278	1.22461	0.21989					YCR091W	YCR091W	35.5376	29.2504	1.21494	0.192675
YEL004W	YEL004W	34.1471	27.9462	1.22189	0.182698					YML017W	YML017W	37.2845	30.447	1.22457	0.219205					YDR461W	YDR461W	37.4391	30.8159	1.21493	0.192439
YGR097W	YGR097W	33.0402	27.0403	1.22189	0.18269					YDL129W	YDL129W	37.0838	30.2836	1.22455	0.218837					YOR040W	YOR040W	35.9745	29.6109	1.21491	0.19207
YDL187C	YDL187C	33.7376	27.6121	1.22184	0.181791					YNL055C	YNL055C	35.2848	28.8145	1.22455	0.218819					YPR043W	YPR043W	36.8181	30.3058	1.21488	0.191583
YNL029C	YNL029C	33.68	27.565	1.22184	0.181729					YLR407W	YLR407W	38.9598	31.8164	1.22452	0.218276					YDR333C	YDR333C	35.9953	29.6291	1.21486	0.191138
YJL172W	YJL172W	33.6818	27.5666	1.22183	0.181605					YGL072C	YGL072C	38.0804	31.0987	1.2245	0.217927					YLR273C	YLR273C	36.5356	30.0742	1.21485	0.190906
YML007W	YML007W	33.6716	27.5588	1.22181	0.181191					YNL213C	YNL213C	33.919	27.7007	1.22448	0.217597					YBR067C	YBR067C	36.2244	29.8182	1.21484	0.190762
YJL118W	YJL118W	34.0187	27.8429	1.22181	0.181101					YCR004C	YCR004C	33.6075	27.4465	1.22447	0.217371					YFL047W	YFL047W	36.4586	30.0121	1.2148	0.189914
YER064C	YER064C	32.8259	26.867	1.22179	0.180774					YDL204W	YDL204W	35.766	29.2113	1.22439	0.215844					YKL216W	YKL216W	33.4751	27.5562	1.2148	0.189878
YNR015W	YNR015W	34.5683	28.2932	1.22179	0.180754					YDR259C	YDR259C	36.4786	29.7933	1.22439	0.215821					YMR098C	YMR098C	35.5279	29.2464	1.21478	0.189523
YPL127C	YPL127C	33.5286	27.4426	1.22177	0.180329					YJL082W	YJL082W	36.3085	29.6545	1.22439	0.215735					YML072C	YML072C	37.1571	30.5877	1.21477	0.189405
YCR071C	YCR071C	33.2002	27.1751	1.22171	0.179243					YNL304W	YNL304W	35.7292	29.1816	1.22437	0.215506					YGL034C	YGL034C	36.0869	29.7068	1.21477	0.189307
YOL017W	YOL017W	32.941	26.963	1.22171	0.179174					YOR022C	YOR022C	36.2189	29.5818	1.22436	0.215306					YLR364W	YLR364W	34.5523	28.4437	1.21476	0.189144
YDL107W	YDL107W	32.643	26.7194	1.2217	0.178919					YML117W	YML117W	38.623	31.5454	1.22436	0.215267					YKL134C	YKL134C	37.249	30.6653	1.2147	0.187919
YER055C	YER055C	33.3158	27.2703	1.22169	0.17875					YBL086C	YBL086C	36.6942	29.9706	1.22434	0.21488					YPL273W	YPL273W	36.5049	30.0528	1.21469	0.187872
YML076C	YML076C	32.7428	26.8018	1.22167	0.178276					YHR076W	YHR076W	35.3046	28.8357	1.22434	0.214797					YDL204W	YDL204W	36.3841	29.9536	1.21468	0.187589
YJR149W	YJR149W	31.964	26.1643	1.22166	0.178228					YLL019C	YLL019C	35.6267	29.0993	1.22432	0.214408					YER130C	YER130C	36.6703	30.1902	1.21464	0.18683
YHR134W	YHR134W	34.6548	28.3671	1.22166	0.178104					YLR031W	YLR031W	36.9124	30.1499	1.2243	0.214054					YJR140C	YJR140C	36.4126	29.9788	1.21461	0.186281
YCL075W	YCL075W	33.4202	27.3565	1.22165	0.178052					YKL150W	YKL150W	35.4849	28.9847	1.22426	0.213419					YDL149W	YDL149W	36.0099	29.6483	1.21457	0.185436
YBR270C	YBR270C	33.1989	27.1754	1.22165	0.178019					YBR033W	YBR033W	36.3062	29.6561	1.22424	0.212983					YGR003W	YGR003W	35.6698	29.3685	1.21456	0.185311
YLL045C	YLL045C	31.7165	25.9625	1.22163	0.177491					YAR002C-A	YAR002C-A	34.8716	28.4844	1.22424	0.21292					YNL055C	YNL055C	35.0858	28.8877	1.21456	0.185233
YOR291W	YOR291W	31.4366	25.7341	1.22159	0.176842					YDR010C	YDR010C	36.0147	29.4191	1.2242	0.212136					YFR043C	YFR043C	35.5862	29.3001	1.21454	0.18495
YGL121C	YGL121C	33.8163	27.6825	1.22158	0.176569					YDR508C	YDR508C	36.3265	29.6748	1.22415	0.211307					YBR066C	YBR066C	37.7682	31.0968	1.21454	0.184852
YAL004W	YAL004W	34.0803	27.8987	1.22157	0.176479					YMR068W	YMR068W	36.1939	29.5665	1.22415	0.211304					YOR108W	YOR108W	37.4756	30.8562	1.21453	0.184613
YML110C	YML110C	30.742	25.166	1.22157	0.176419					YPR083W	YPR083W	35.7297	29.1883	1.22411	0.21049					YOL028C	YOL028C	36.3686	29.9447	1.21452	0.184564
YMR152W	YMR152W	36.3262	29.7375	1.22156	0.176218					YDR176W	YDR176W	37.0302	30.2516	1.22408	0.209873					YHR156C	YHR156C	37.6734	31.0191	1.21452	0.184495
YOR187W	YOR187W	31.9535	26.1579	1.22156	0.176214					YKL008C	YKL008C	34.2734	27.9995	1.22407	0.209822					YNL052W	YNL052W	34.9242	28.7558	1.21451	0.184337
YEL067C	YEL067C	34.3877	28.1509	1.22155	0.175966					YIL002C	YIL002C	36.9528	30.1885	1.22407	0.209697					YDR061W	YDR061W	34.9423	28.7711	1.21449	0.183995
YIR024C	YIR024C	33.6291	27.5305	1.22152	0.175392					YKL025C	YKL025C	40.0113	32.6878	1.22404	0.209251					YPL050C	YPL050C	34.9465	28.7754	1.21446	0.183263
YOR158W	YOR158W	32.6096	26.6963	1.2215	0.175028					YAR020C	YAR020C	36.3983	29.7362	1.22404	0.20918					YOL030W	YOL030W	36.676	30.2002	1.21443	0.182748
YHR044C	YHR044C	32.7368	26.8018	1.22144	0.173819					YKR089C	YKR089C	36.0699	29.4679	1.22404	0.209134					YOR022C	YOR022C	35.9742	29.6226	1.21442	0.182497
YGL240W	YGL240W	33.4126	27.3552	1.22143	0.173648					YLL039C	YLL039C	36.1248	29.5141	1.22398	0.208129					YAL017W	YAL017W	36.4884	30.0466	1.2144	0.182068
YPL005W	YPL005W	31.7582	26.001	1.22142	0.173414					YGR153W	YGR153W	36.1448	29.5304	1.22398	0.208121					YNR015W	YNR015W	36.2869	29.8822	1.21433	0.180861
YCL035C	YCL035C	33.6006	27.5097	1.22141	0.173125					YOL033W	YOL033W	34.7932	28.4264	1.22397	0.207912					YPL024W	YPL024W	36.5702	30.1158	1.21432	0.1806
YGR250C	YGR250C	32.9894	27.0096	1.2214	0.172955					YJL064W	YJL064W	35.5725	29.0637	1.22395	0.207459					YDR350C	YDR350C	35.9082	29.5709	1.21431	0.180364
YJR031C	YJR031C	32.4894	26.6006	1.22138	0.172546					YDL170W	YDL170W	36.3992	29.7393	1.22394	0.207343					YGR109C	YGR109C	36.2428	29.8467	1.2143	0.180166
YOR134W	YOR134W	34.227	28.0235	1.22137	0.172356					YEL008W	YEL008W	38.0416	31.0816	1.22392	0.206991					YOR377W	YOR377W	36.1119	29.7391	1.21429	0.180064
YOR255W	YOR255W	33.3458	27.3024	1.22135	0.172061					YPL106C	YPL106C	39.6593	32.4035	1.22392	0.206908					YKL114C	YKL114C	36.785	30.2937	1.21428	0.179811
YFL003C	YFL003C	32.7755	26.8356	1.22135	0.171951					YPL196W	YPL196W	36.5352	29.8511	1.22392	0.206819					YKR040C	YKR040C	35.6587	29.3678	1.21421	0.178455
YOR311C	YOR311C	33.2892	27.2568	1.22132	0.171402					YLR451W	YLR451W	36.5126	29.8332	1.22389	0.206359					YGR188C	YGR188C	37.7177	31.0636	1.21421	0.178438
YOL050C	YOL050C	33.0368	27.0508	1.22129	0.170741					YFL003C	YFL003C	35.0963	28.6763	1.22388	0.206132					YGL086W	YGL086W	35.0057	28.8304	1.21419	0.178156
YBR076W	YBR076W	34.2863	28.0742	1.22127	0.170524					YJL013C	YJL013C	35.5862	29.0767	1.22387	0.206026					YOR202W	YOR202W	35.6363	29.3497	1.21419	0.178154
YMR167W	YMR167W	36.2806	29.7072	1.22127	0.170464					YLR070C	YLR070C	36.0029	29.4176	1.22386	0.205729					YKL214C	YKL214C	34.9918	28.8193	1.21418	0.17788
YNL142W	YNL142W	33.0001	27.0212	1.22127	0.17042					YGL221C	YGL221C	37.031	30.2579	1.22385	0.205557					YEL008W	YEL008W	37.8993	31.2141	1.21417	0.177728
YML112W	YML112W	38.8168	31.7841	1.22127	0.170356					YAL008W	YAL008W	37.3558	30.5232	1.22385	0.205538					YBR090C	YBR090C	35.0159	28.8401	1.21414	0.177149
YDR032C	YDR032C	33.2776	27.2488	1.22125	0.170066					YGR148C	YGR148C	34.7799	28.4191	1.22382	0.205076					YGR014W	YGR014W	36.2377	29.8467	1.21413	0.176875
YPR038W	YPR038W	33.132	27.1296	1.22125	0.170043					YKL208W	YKL208W	34.819	28.452	1.22378	0.204207					YAL036C	YAL036C	36.6769	30.2087	1.21412	0.176693
YJR037W	YJR037W	31.2126	25.5583	1.22123	0.169669					YOL045W	YOL045W	36.8499	30.112	1.22376	0.20392					YOR029W	YOR029W	36.1619	29.7846	1.21412	0.17664
YGR281W	YGR281W	33.2158	27.1992	1.22121	0.169228					YDR018C	YDR018C	35.5764	29.0715	1.22375	0.203761					YNR067C	YNR067C	35.3017	29.0765	1.2141	0.17626
YKL067W	YKL067W	31.3052	25.6349	1.2212	0.168966					YPL240C	YPL240C	35.6927	29.1666	1.22375	0.203753					YHL010C	YHL010C	35.9453	29.6067	1.21409	0.176181
YGR268C	YGR268C	34.0043	27.8454	1.22118	0.168726					YBR115C	YBR115C	36.585	29.8958	1.22375	0.203711					YMR181C	YMR181C	35.8707	29.5455	1.21408	0.176035
YKR046C	YKR046C	32.4137	26.5431	1.22117	0.168538					YLR273C	YLR273C	36.499	29.8259	1.22373	0.203394					YLR353W	YLR353W	35.3677	29.1313	1.21408	0.175924
YGL196W	YGL196W	34.5227	28.2703	1.22116	0.168351					YDR281C	YDR281C	36.4719	29.8043	1.22371	0.203					YDL227C	YDL227C	36.076	29.7161	1.21402	0.174797
YMR194W	YMR194W	31.8076	26.0475	1.22114	0.167841					YGR224W	YGR224W	35.3921	28.9223	1.22369	0.202641					YNL016W	YNL016W	37.1676	30.6165	1.21397	0.173855
YPR091C	YPR091C	34.0847	27.9127	1.22112	0.167386					YPL050C	YPL050C	35.2272	28.7885	1.22365	0.201872					YJL135W	YJL135W	34.802	28.6679	1.21397	0.173767
YLR032W	YLR032W	34.3929	28.1652	1.22111	0.167284					YNL027W	YNL027W	35.7467	29.2131	1.22365	0.201814					YPL027W	YPL027W	36.3645	29.9552	1.21396	0.17363
YIL073C	YIL073C	33.5011	27.4351	1.22111	0.167202					YGR248W	YGR248W	36.3098	29.6735	1.22364	0.201678					YNR009W	YNR009W	35.3281	29.1016	1.21396	0.173533
YER113C	YER113C	33.283	27.2567	1.22109	0.166967					YGR044C	YGR044C	36.4355	29.7777	1.22358	0.200557					YOL023W	YOL023W	34.2433	28.2096	1.21389	0.1722
YDR309C	YDR309C	34.1992	28.0072	1.22109	0.166833					YGR192C	YGR192C	36.9508	30.1992	1.22357	0.200289					YMR065W	YMR065W	35.4105	29.1711	1.21389	0.1722
YPL254W	YPL254W	35.2546	28.8715	1.22109	0.166795					YEL004W	YEL004W	36.5687	29.8874	1.22355	0.199852					YOR283W	YOR283W	36.1146	29.7513	1.21388	0.172107
YHR038W	YHR038W	32.9218	26.9611	1.22108	0.166765					YGR045C	YGR045C	37.3084	30.4923	1.22354	0.199693					YEL065W	YEL065W	36.7358	30.2632	1.21388	0.171966
YFR034C	YFR034C	34.337	28.1204	1.22107	0.166484					YLR246W	YLR246W	34.8419	28.4767	1.22352	0.199413					YBR275C	YBR275C	36.6109	30.1606	1.21386	0.171729
YPL053C	YPL053C	33.1208	27.1245	1.22107	0.166385					YNL249C	YNL249C	34.017	27.803	1.2235	0.198972					YFL003C	YFL003C	35.4768	29.2266	1.21385	0.171536
YKL023W	YKL023W	36.7816	30.1233	1.22103	0.165735					YIR038C	YIR038C	36.0934	29.5011	1.22346	0.198213					YBR189W	YBR189W	35.7295	29.4358	1.21381	0.170723
YPR114W	YPR114W	32.2228	26.3901	1.22102	0.165476					YLR306W	YLR306W	35.1567	28.7361	1.22343	0.197709					YFR047C	YFR047C	36.2692	29.8805	1.21381	0.170712
YJR044C	YJR044C	33.4606	27.404	1.22101	0.165333					YDR249C	YDR249C	35.7354	29.21	1.22339	0.196977					YOR220W	YOR220W	35.7601	29.4618	1.21378	0.170096
YDR192C	YDR192C	33.5494	27.4781	1.22095	0.164049					YGR124W	YGR124W	35.8002	29.263	1.22339	0.196957					YPL264C	YPL264C	37.272	30.7079	1.21376	0.169725
YGR205W	YGR205W	32.6924	26.7764	1.22094	0.163949					YOR061W	YOR061W	32.891	26.8857	1.22336	0.196399					YER050C	YER050C	35.1076	28.9247	1.21376	0.169679
YKR031C	YKR031C	32.4538	26.5811	1.22094	0.163823					YEL003W	YEL003W	38.3057	31.3122	1.22335	0.19605					YMR193W	YMR193W	34.0386	28.0443	1.21375	0.169454
YKR074W	YKR074W	34.6566	28.3855	1.22093	0.163676					YGR209C	YGR209C	36.0033	29.4305	1.22333	0.195832					YGR032W	YGR032W	34.8648	28.725	1.21375	0.169454
YIL089W	YIL089W	32.3085	26.4625	1.22092	0.163452					YFR057W	YFR057W	35.362	28.9065	1.22332	0.195641					YMR022W	YMR022W	35.7192	29.429	1.21374	0.169369
YGL154W	YGL154W	32.5746	26.6807	1.2209	0.16315					YNL136W	YNL136W	36.1335	29.5389	1.22325	0.194305					YJL197W	YJL197W	34.5496	28.4655	1.21374	0.169308
YNL191W	YNL191W	32.7263	26.8053	1.22089	0.162885					YOR223W	YOR223W	37.0436	30.2829	1.22325	0.194304					YLR433C	YLR433C	37.521	30.9151	1.21368	0.168131
YNL200C	YNL200C	33.0534	27.0737	1.22087	0.16246					YER017C	YER017C	36.3135	29.6865	1.22323	0.19387					YBR207W	YBR207W	36.0068	29.6686	1.21363	0.167257
YDL234C	YDL234C	33.5111	27.4487	1.22086	0.162302					YLR199C	YLR199C	35.9972	29.4281	1.22322	0.193734					YGL081W	YGL081W	36.0585	29.7115	1.21362	0.166987
YOR083W	YOR083W	30.5886	25.055	1.22086	0.162264					YHR029C	YHR029C	36.425	29.7783	1.22321	0.193441					YOR066W	YOR066W	38.8802	32.0371	1.2136	0.166614
YGL036W	YGL036W	33.086	27.1008	1.22085	0.162108					YOR163W	YOR163W	36.4612	29.8079	1.22321	0.193392					YDL162C	YDL162C	36.2529	29.8724	1.21359	0.166473
YMR119W-A	YMR119W-A	33.1508	27.154	1.22084	0.162001					YGR205W	YGR205W	34.6658	28.3406	1.22318	0.192977					YKR034W	YKR034W	34.6513	28.5529	1.21358	0.166272
YJL155C	YJL155C	32.2756	26.4375	1.22082	0.161573					YBR125C	YBR125C	35.5882	29.0948	1.22318	0.192964					YDR368W	YDR368W	36.2171	29.8433	1.21358	0.166143
YGL002W	YGL002W	32.1	26.2938	1.22082	0.161522					YDR048C	YDR048C	36.1472	29.5519	1.22318	0.192827					YOR230W	YOR230W	37.1714	30.6298	1.21357	0.166047
YHR021C	YHR021C	36.5455	29.9358	1.22079	0.160997					YKL217W	YKL217W	34.6689	28.3434	1.22317	0.192815					YJL177W	YJL177W	35.2203	29.0224	1.21355	0.165714
YHR142W	YHR142W	34.2495	28.0552	1.22079	0.160962					YOR017W	YOR017W	35.6672	29.1598	1.22317	0.192663					YBL029W	YBL029W	36.9909	30.4817	1.21354	0.165533
YOL151W	YOL151W	34.3896	28.1701	1.22079	0.160841					YIL015C-A	YIL015C-A	35.9707	29.4082	1.22315	0.192383					YGL053W	YGL053W	35.1337	28.9514	1.21354	0.16544
YLL059C	YLL059C	31.8185	26.0644	1.22076	0.160424					YOL036W	YOL036W	35.0369	28.6453	1.22313	0.19201					YLR044C	YLR044C	37.1515	30.6145	1.21353	0.165159
YCR063W	YCR063W	38.3022	31.3756	1.22076	0.160423					YPR122W	YPR122W	38.2351	31.2605	1.22311	0.191594					YKR103W	YKR103W	35.8669	29.5565	1.2135	0.164734
YBL081W	YBL081W	36.9061	30.2321	1.22076	0.160262					YNL071W	YNL071W	33.9214	27.7341	1.22309	0.191267					YKR028W	YKR028W	34.8161	28.6907	1.2135	0.164625
YLR446W	YLR446W	33.7529	27.6492	1.22076	0.160247					YDR275W	YDR275W	35.9655	29.4058	1.22307	0.190924					YGL165C	YGL165C	35.3595	29.1387	1.21349	0.16449
YMR209C	YMR209C	34.6097	28.3515	1.22073	0.159822					YGL089C	YGL089C	35.4751	29.0049	1.22307	0.190896					YGL043W	YGL043W	34.7847	28.6652	1.21348	0.164297
YEL014C	YEL014C	32.711	26.7969	1.2207	0.159154					YDR120C	YDR120C	35.8762	29.3329	1.22307	0.190796					YOR253W	YOR253W	36.1058	29.7551	1.21343	0.163394
YNR056C	YNR056C	32.9868	27.023	1.22069	0.159027					YOR348C	YOR348C	37.3918	30.5722	1.22307	0.190754					YDR233C	YDR233C	36.1868	29.8218	1.21343	0.163364
YMR171C	YMR171C	33.0646	27.0878	1.22065	0.158099					YLR270W	YLR270W	36.5358	29.8724	1.22306	0.190734					YOR255W	YOR255W	35.9805	29.6519	1.21343	0.163302
YER059W	YER059W	35.2808	28.9041	1.22062	0.157517					YOR013W	YOR013W	37.1067	30.3392	1.22306	0.190615					YJL171C	YJL171C	36.1274	29.773	1.21343	0.163291
YLR136C	YLR136C	34.8689	28.5667	1.22061	0.157421					YNL159C	YNL159C	35.2768	28.8434	1.22305	0.190416					YBR077C	YBR077C	35.5927	29.3324	1.21343	0.16324
YER091C	YER091C	34.6491	28.3873	1.22059	0.15687					YAL064C-A	YAL064C-A	35.7294	29.2137	1.22304	0.190236					YDR178W	YDR178W	35.5229	29.2754	1.2134	0.162804
YHL040C	YHL040C	33.8796	27.7576	1.22055	0.156246					YER027C	YER027C	37.0062	30.2579	1.22303	0.190019					YDL156W	YDL156W	35.4875	29.2463	1.2134	0.162741
YNL284C	YNL284C	32.3186	26.4788	1.22055	0.156093					YOR076C	YOR076C	37.8271	30.9291	1.22303	0.189987					YKR069W	YKR069W	35.9481	29.6261	1.21339	0.162614
YBL036C	YBL036C	34.5575	28.3133	1.22054	0.156007					YDL202W	YDL202W	33.869	27.6928	1.22302	0.189974					YNL281W	YNL281W	35.907	29.5923	1.21339	0.162533
YEL043W	YEL043W	33.8885	27.7658	1.22051	0.155424					YDR131C	YDR131C	33.8809	27.7027	1.22302	0.18985					YDR256C	YDR256C	35.7464	29.46	1.21339	0.162447
YLR432W	YLR432W	33.0059	27.0431	1.22049	0.154991					YBL021C	YBL021C	33.7083	27.5623	1.22299	0.189306					YHR139C	YHR139C	36.4593	30.0477	1.21338	0.162392
YML029W	YML029W	31.3531	25.6889	1.22049	0.154981					YDL059C	YDL059C	36.7812	30.076	1.22294	0.188413					YJL046W	YJL046W	36.5517	30.1242	1.21337	0.162138
YIL157C	YIL157C	33.6472	27.5687	1.22048	0.154853					YMR135W-A	YMR135W-A	34.5086	28.2177	1.22294	0.188381					YOR079C	YOR079C	37.5197	30.922	1.21337	0.162085
YJR034W	YJR034W	32.9414	26.9912	1.22045	0.154194					YNL320W	YNL320W	34.4108	28.1379	1.22293	0.188239					YPR084W	YPR084W	35.1603	28.9776	1.21336	0.161959
YCL046W	YCL046W	32.9957	27.0358	1.22044	0.154054					YDR285W	YDR285W	36.8155	30.105	1.2229	0.187633					YBL036C	YBL036C	36.9565	30.4586	1.21334	0.161497
YDR336W	YDR336W	33.6634	27.5831	1.22043	0.15387					YGR225W	YGR225W	36.8164	30.1068	1.22286	0.186857					YLR410W	YLR410W	35.9668	29.6432	1.21332	0.16121
YBR156C	YBR156C	33.1782	27.1857	1.22043	0.153767					YLR203C	YLR203C	36.2221	29.621	1.22285	0.186723					YGL210W	YGL210W	35.2969	29.0915	1.21331	0.160929
YNL280C	YNL280C	32.1121	26.3134	1.22037	0.152602					YNL141W	YNL141W	36.0256	29.4607	1.22283	0.186378					YMR171C	YMR171C	35.5244	29.2791	1.2133	0.160783
YJL013C	YJL013C	34.2341	28.0523	1.22036	0.152491					YCL009C	YCL009C	35.7409	29.2291	1.22279	0.185442					YHR076W	YHR076W	35.2976	29.0923	1.2133	0.160749
YML096W	YML096W	35.1516	28.8046	1.22035	0.15221					YNL329C	YNL329C	35.4518	28.9932	1.22276	0.185013					YLR233C	YLR233C	42.302	34.8665	1.21326	0.15992
YGR238C	YGR238C	33.3507	27.3289	1.22035	0.152185					YJL084C	YJL084C	34.8627	28.5117	1.22275	0.184803					YJL137C	YJL137C	35.5688	29.3169	1.21325	0.159851
YGR194C	YGR194C	32.1201	26.3208	1.22033	0.151839					YCL005W	YCL005W	43.5253	35.5965	1.22274	0.184581					YEL037C	YEL037C	36.9936	30.4932	1.21318	0.158361
YLR180W	YLR180W	33.7786	27.6804	1.22031	0.151425					YBR119W	YBR119W	35.7921	29.2725	1.22272	0.184269					YJL112W	YJL112W	35.5439	29.2986	1.21316	0.158029
YJL196C	YJL196C	33.6226	27.553	1.22029	0.150995					YML095C	YML095C	36.7748	30.0766	1.2227	0.183897					YDL238C	YDL238C	36.1993	29.8392	1.21314	0.157764
YPL148C	YPL148C	33.256	27.2538	1.22023	0.149925					YCL011C	YCL011C	34.8628	28.5137	1.22267	0.183223					YGR100W	YGR100W	34.9793	28.8344	1.21311	0.157093
YOR229W	YOR229W	33.5539	27.4983	1.22022	0.149603					YOL151W	YOL151W	36.1806	29.5922	1.22264	0.18265					YKR085C	YKR085C	35.3056	29.1034	1.21311	0.157089
YNR001C	YNR001C	32.788	26.8707	1.22022	0.149559					YMR153W	YMR153W	36.9436	30.2163	1.22264	0.182634					YDL177C	YDL177C	35.549	29.3045	1.21309	0.156738
YOR381W	YOR381W	33.8566	27.7466	1.2202	0.14931					YEL037C	YEL037C	36.5287	29.8774	1.22262	0.18227					YHR049C-A	YHR049C-A	37.1052	30.5884	1.21305	0.155889
YOR177C	YOR177C	34.2676	28.0839	1.22019	0.14895					YGR173W	YGR173W	35.1406	28.7434	1.22256	0.181248					YLR144C	YLR144C	36.5731	30.1501	1.21303	0.155582
YLR150W	YLR150W	33.3006	27.2924	1.22014	0.148069					YIR034C	YIR034C	36.3272	29.7146	1.22253	0.180709					YDL183C	YDL183C	38.126	31.4305	1.21303	0.155473
YOL039W	YOL039W	33.3054	27.2964	1.22014	0.148043					YBR005W	YBR005W	35.4547	29.0013	1.22252	0.180434					YKR104W	YKR104W	36.5435	30.1265	1.213	0.155031
YOL160W	YOL160W	33.2708	27.2681	1.22014	0.147998					YGL010W	YGL010W	35.6108	29.1297	1.22249	0.179882					YDR134C	YDR134C	35.3122	29.1123	1.21297	0.154295
YPL268W	YPL268W	35.2813	28.9161	1.22013	0.147805					YNL330C	YNL330C	36.0034	29.4517	1.22245	0.179186					YNL085W	YNL085W	36.5773	30.1554	1.21296	0.154189
YER019C-A	YER019C-A	34.0641	27.9185	1.22013	0.147799					YBR217W	YBR217W	36.5171	29.8722	1.22244	0.178996					YML090W	YML090W	35.4225	29.2039	1.21294	0.153693
YBR298C	YBR298C	36.0905	29.5807	1.22007	0.146665					YDR095C	YDR095C	35.7554	29.2494	1.22243	0.178762					YGR053C	YGR053C	34.1697	28.1712	1.21293	0.153616
YBR215W	YBR215W	33.8985	27.7841	1.22007	0.14662					YJR001W	YJR001W	35.01	28.6411	1.22237	0.177621					YOR316C	YOR316C	34.192	28.1897	1.21293	0.153514
YGL218W	YGL218W	34.2486	28.0712	1.22006	0.146459					YBR076W	YBR076W	37.3441	30.5512	1.22235	0.17717					YGR130C	YGR130C	36.0053	29.6848	1.21292	0.153405
YHR125W	YHR125W	33.9427	27.8207	1.22005	0.146312					YAL067C	YAL067C	36.3189	29.7126	1.22234	0.177032					YER164W	YER164W	35.373	29.1637	1.21292	0.153299
YMR190C	YMR190C	33.9045	27.7895	1.22005	0.146174					YAL028W	YAL028W	35.4799	29.0262	1.22234	0.176987					YHR025W	YHR025W	35.9259	29.6196	1.21291	0.153201
YOL150C	YOL150C	32.9303	26.9913	1.22004	0.146002					YGL256W	YGL256W	36.3478	29.7366	1.22233	0.176802					YGR086C	YGR086C	36.0973	29.7613	1.21289	0.152866
YOR337W	YOR337W	32.3583	26.5226	1.22003	0.145868					YHR142W	YHR142W	37.2422	30.4686	1.22232	0.176579					YGL240W	YGL240W	34.7288	28.6336	1.21287	0.152358
YLR371W	YLR371W	31.7854	26.0531	1.22002	0.145762					YBR275C	YBR275C	35.9816	29.4375	1.22231	0.176377					YBR158W	YBR158W	38.176	31.4771	1.21282	0.151439
YNL067W	YNL067W	31.8913	26.1404	1.22	0.145288					YDR239C	YDR239C	36.2928	29.6929	1.22227	0.17578					YPL196W	YPL196W	36.8861	30.414	1.2128	0.151096
YKL085W	YKL085W	32.1111	26.3208	1.21999	0.145028					YDL243C	YDL243C	35.1988	28.7979	1.22227	0.17569					YDR509W	YDR509W	35.3735	29.1669	1.21279	0.150955
YGR138C	YGR138C	32.4043	26.5614	1.21998	0.144795					YOR147W	YOR147W	35.2728	28.859	1.22225	0.175287					YER047C	YER047C	36.5136	30.1071	1.21279	0.150841
YJL044C	YJL044C	33.3174	27.3102	1.21996	0.144492					YEL038W	YEL038W	36.424	29.8013	1.22223	0.174978					YAR002C-A	YAR002C-A	34.8911	28.7698	1.21277	0.15048
YKR091W	YKR091W	32.8346	26.9145	1.21996	0.144473					YLL033W	YLL033W	35.0531	28.6797	1.22223	0.174868					YDR268W	YDR268W	36.0184	29.6995	1.21276	0.150332
YJL216C	YJL216C	32.9316	26.9942	1.21995	0.144326					YOR012W	YOR012W	36.082	29.5223	1.2222	0.17428					YGL248W	YGL248W	36.4168	30.0287	1.21273	0.149798
YDR206W	YDR206W	33.4952	27.4564	1.21994	0.144099					YGL157W	YGL157W	35.9185	29.389	1.22217	0.173855					YHR136C	YHR136C	36.5055	30.102	1.21273	0.149643
YER174C	YER174C	34.4463	28.2362	1.21993	0.14395					YGR089W	YGR089W	35.7334	29.2376	1.22217	0.173842					YJL064W	YJL064W	36.2038	29.8534	1.21272	0.149516
YDR333C	YDR333C	33.872	27.7663	1.2199	0.143248					YER019C-A	YER019C-A	36.0629	29.5087	1.22211	0.172703					YDR015C	YDR015C	35.7533	29.482	1.21272	0.149471
YGL260W	YGL260W	33.7525	27.6687	1.21988	0.142883					YDL189W	YDL189W	34.4672	28.2032	1.2221	0.172534					YOL037C	YOL037C	35.9948	29.6815	1.2127	0.149124
YNL020C	YNL020C	32.336	26.5075	1.21988	0.142856					YER034W	YER034W	37.4681	30.6592	1.22208	0.172135					YNL265C	YNL265C	35.631	29.3821	1.21268	0.148658
YIL117C	YIL117C	32.9167	26.984	1.21986	0.142552					YJR118C	YJR118C	36.6453	29.986	1.22208	0.172131					YER134C	YER134C	36.1447	29.806	1.21267	0.148467
YHR006W	YHR006W	33.7908	27.7008	1.21985	0.142266					YIL041W	YIL041W	37.3591	30.5703	1.22207	0.171963					YKR091W	YKR091W	34.9667	28.8351	1.21264	0.148018
YPL259C	YPL259C	33.9055	27.7949	1.21984	0.142196					YKL061W	YKL061W	37.0425	30.3114	1.22206	0.171771					YIL117C	YIL117C	35.0995	28.9447	1.21264	0.147963
YPL071C	YPL071C	33.5918	27.5381	1.21983	0.141864					YGR171C	YGR171C	34.9197	28.5746	1.22205	0.171597					YNL057W	YNL057W	35.3959	29.1892	1.21264	0.147916
YDR405W	YDR405W	31.7953	26.0663	1.21978	0.141007					YDL130W-A	YDL130W-A	34.6957	28.3916	1.22204	0.171329					YLL027W	YLL027W	36.3767	29.9984	1.21262	0.147634
YKL217W	YKL217W	31.801	26.0711	1.21978	0.140957					YEL039C	YEL039C	37.8447	30.9703	1.22197	0.169965					YJL047C	YJL047C	37.0311	30.538	1.21262	0.147633
YGL132W	YGL132W	33.6032	27.5485	1.21978	0.14095					YDR539W	YDR539W	35.8938	29.374	1.22196	0.169808					YBR094W	YBR094W	35.5144	29.2875	1.21261	0.147424
YJL082W	YJL082W	31.9836	26.2209	1.21978	0.140846					YNL047C	YNL047C	36.7358	30.0633	1.22195	0.169613					YNL257C	YNL257C	35.9866	29.6773	1.2126	0.147134
YNL265C	YNL265C	32.5479	26.6843	1.21974	0.140171					YKL204W	YKL204W	43.0553	35.235	1.22195	0.169588					YPL031C	YPL031C	36.481	30.0852	1.21259	0.146995
YDL035C	YDL035C	33.0746	27.1161	1.21974	0.140169					YJL158C	YJL158C	36.7208	30.0512	1.22194	0.169505					YOR195W	YOR195W	36.7366	30.2962	1.21258	0.146806
YHR105W	YHR105W	34.4412	28.2367	1.21973	0.139958					YLR418C	YLR418C	38.8854	31.8227	1.22194	0.169396					YDL182W	YDL182W	37.7779	31.1553	1.21257	0.14655
YDL154W	YDL154W	32.6993	26.8091	1.21971	0.139484					YHR198C	YHR198C	36.8173	30.1303	1.22193	0.169327					YDR010C	YDR010C	36.2215	29.8718	1.21256	0.146493
YKR039W	YKR039W	32.8547	26.9366	1.21971	0.139436					YOR099W	YOR099W	37.0243	30.3001	1.22192	0.169053					YOR121C	YOR121C	36.6677	30.24	1.21256	0.146371
YDR318W	YDR318W	35.583	29.1734	1.2197	0.139419					YDR139C	YDR139C	34.996	28.6402	1.22192	0.169045					YLR202C	YLR202C	34.5953	28.531	1.21255	0.146206
YHR082C	YHR082C	33.3246	27.3222	1.21969	0.139123					YMR102C	YMR102C	35.8837	29.3669	1.22191	0.168908					YNR064C	YNR064C	35.4721	29.2543	1.21254	0.14602
YPL136W	YPL136W	32.3136	26.4935	1.21968	0.138945					YER130C	YER130C	36.9283	30.2219	1.2219	0.168781					YBL059W	YBL059W	35.2946	29.108	1.21254	0.146019
YOR277C	YOR277C	33.5222	27.4847	1.21967	0.138712					YLR057W	YLR057W	36.6608	30.0031	1.2219	0.168697					YBL019W	YBL019W	36.9212	30.4495	1.21254	0.146017
YGL037C	YGL037C	34.1089	27.9658	1.21966	0.138593					YOR086C	YOR086C	36.6332	29.9806	1.2219	0.168648					YNL203C	YNL203C	35.6689	29.4169	1.21253	0.145828
YBR005W	YBR005W	33.716	27.6442	1.21964	0.138161					YMR171C	YMR171C	36.7278	30.058	1.2219	0.168609					YGL157W	YGL157W	35.8119	29.5348	1.21253	0.145808
YNR061C	YNR061C	33.552	27.5101	1.21962	0.137829					YNR014W	YNR014W	35.1455	28.7632	1.22189	0.16851					YLR209C	YLR209C	35.2099	29.0384	1.21253	0.145763
YGR043C	YGR043C	33.0636	27.11	1.21961	0.137579					YNL265C	YNL265C	36.5199	29.8885	1.22187	0.168176					YNL116W	YNL116W	36.887	30.4217	1.21252	0.145642
YDR490C	YDR490C	33.308	27.3104	1.21961	0.137479					YDL184C	YDL184C	36.1059	29.5511	1.22181	0.166996					YLL029W	YLL029W	35.3439	29.1491	1.21252	0.145628
YDR022C	YDR022C	33.1551	27.1852	1.2196	0.137331					YLR353W	YLR353W	35.0977	28.7262	1.2218	0.166821					YOL088C	YOL088C	36.0986	29.7718	1.21251	0.145425
YJL047C	YJL047C	33.9758	27.8582	1.2196	0.137251					YGL126W	YGL126W	37.8934	31.0147	1.22179	0.16658					YDR384C	YDR384C	35.8547	29.5727	1.21243	0.143802
YAL030W	YAL030W	32.166	26.375	1.21957	0.136652					YBR094W	YBR094W	35.7172	29.2336	1.22178	0.166502					YGL161C	YGL161C	35.5293	29.3055	1.21238	0.14286
YEL071W	YEL071W	34.495	28.2847	1.21956	0.136627					YML090W	YML090W	35.2031	28.8129	1.22178	0.166481					YJL147C	YJL147C	35.3642	29.1693	1.21238	0.142817
YKL040C	YKL040C	34.3055	28.1297	1.21955	0.136282					YJR039W	YJR039W	35.4121	28.9841	1.22178	0.166355					YDR317W	YDR317W	36.796	30.3504	1.21237	0.142752
YOL001W	YOL001W	33.1225	27.1599	1.21954	0.136084					YDL227C	YDL227C	35.6373	29.1691	1.22175	0.165876					YLR023C	YLR023C	37.7637	31.149	1.21236	0.142424
YPR039W	YPR039W	33.4666	27.4422	1.21953	0.135893					YCR077C	YCR077C	36.8056	30.1261	1.22172	0.165232					YER121W	YER121W	35.744	29.4832	1.21235	0.142339
YCR105W	YCR105W	32.6805	26.7977	1.21953	0.135872					YFL014W	YFL014W	37.2263	30.4707	1.22171	0.165061					YKR066C	YKR066C	37.6451	31.0514	1.21235	0.142284
YAR047C	YAR047C	35.3183	28.9607	1.21952	0.135831					YLR142W	YLR142W	35.566	29.1122	1.22169	0.164694					YBL091C-A	YBL091C-A	36.823	30.3739	1.21232	0.141793
YKL086W	YKL086W	33.6795	27.6175	1.2195	0.135359					YFR030W	YFR030W	37.1392	30.4	1.22168	0.164576					YDL085W	YDL085W	36.1355	29.8075	1.2123	0.141258
YNL338W	YNL338W	33.8178	27.7314	1.21948	0.13493					YLR219W	YLR219W	35.2568	28.8594	1.22167	0.164426					YGL094C	YGL094C	36.8319	30.3821	1.21229	0.141148
YLR421C	YLR421C	30.7732	25.2351	1.21946	0.134602					YPL194W	YPL194W	37.0573	30.3334	1.22167	0.164271					YER128W	YER128W	36.5612	30.159	1.21228	0.140949
YLR433C	YLR433C	35.1951	28.8613	1.21946	0.134484					YNR001C	YNR001C	35.8591	29.3528	1.22166	0.164116					YNL108C	YNL108C	35.048	28.9108	1.21228	0.140934
YJL046W	YJL046W	34.1308	27.9888	1.21945	0.134337					YML118W	YML118W	36.0643	29.5212	1.22164	0.163757					YNL274C	YNL274C	35.1933	29.0307	1.21228	0.140891
YKL034W	YKL034W	32.4703	26.6277	1.21941	0.133675					YLR040C	YLR040C	35.4183	28.9926	1.22163	0.163614					YBL056W	YBL056W	36.0708	29.7548	1.21227	0.14075
YDR061W	YDR061W	32.9521	27.023	1.21941	0.133621					YDR270W	YDR270W	36.2052	29.6381	1.22158	0.162561					YAL008W	YAL008W	37.7902	31.1732	1.21227	0.140684
YDR293C	YDR293C	34.858	28.5861	1.2194	0.13346					YNR066C	YNR066C	35.8425	29.3414	1.22157	0.162385					YKR080W	YKR080W	36.9447	30.4767	1.21223	0.139901
YKL149C	YKL149C	32.8584	26.9465	1.2194	0.133282					YGL231C	YGL231C	37.0749	30.3515	1.22152	0.161471					YLR346C	YLR346C	36.3501	29.9868	1.2122	0.139479
YJL126W	YJL126W	33.2616	27.2779	1.21936	0.132592					YER161C	YER161C	38.3893	31.4276	1.22151	0.161386					YKL030W	YKL030W	35.2368	29.0685	1.2122	0.13937
YLL006W	YLL006W	33.989	27.8745	1.21935	0.132483					YDL124W	YDL124W	36.4001	29.8002	1.22147	0.160612					YMR190C	YMR190C	36.314	29.9571	1.2122	0.139362
YDR135C	YDR135C	33.8277	27.7424	1.21935	0.13243					YBR242W	YBR242W	35.4957	29.0606	1.22144	0.159929					YJL106W	YJL106W	35.9858	29.6864	1.2122	0.139341
YBR090C	YBR090C	33.3079	27.3162	1.21935	0.132326					YGL248W	YGL248W	36.4822	29.8686	1.22142	0.159638					YDR321W	YDR321W	36.9977	30.5215	1.21218	0.139098
YOR321W	YOR321W	32.6092	26.7433	1.21934	0.132201					YGR247W	YGR247W	34.8898	28.5649	1.22142	0.159632					YLR142W	YLR142W	36.2787	29.9284	1.21218	0.139034
YAL061W	YAL061W	33.3412	27.3445	1.2193	0.131436					YIL167W	YIL167W	35.5864	29.1354	1.22141	0.159481					YPR171W	YPR171W	35.9991	29.6983	1.21216	0.13861
YNR024W	YNR024W	33.604	27.5604	1.21928	0.131078					YLR309C	YLR309C	36.281	29.7044	1.2214	0.159302					YEL025C	YEL025C	36.1252	29.8024	1.21216	0.138561
YLL023C	YLL023C	35.0076	28.712	1.21927	0.13079					YHR114W	YHR114W	36.3096	29.7279	1.2214	0.159247					YPL002C	YPL002C	36.675	30.2563	1.21214	0.138286
YDL189W	YDL189W	32.8017	26.9028	1.21927	0.130773					YDR256C	YDR256C	35.7685	29.2851	1.22139	0.159073					YGR256W	YGR256W	36.3372	29.9779	1.21214	0.138139
YCR098C	YCR098C	33.1414	27.1816	1.21926	0.130589					YGL053W	YGL053W	35.8006	29.3113	1.22139	0.159058					YCR073C	YCR073C	35.9842	29.6867	1.21213	0.138071
YNL242W	YNL242W	34.1447	28.0051	1.21923	0.130049					YGL202W	YGL202W	35.6934	29.2253	1.22132	0.157686					YGR281W	YGR281W	35.727	29.4747	1.21212	0.13791
YLR255C	YLR255C	31.8813	26.1492	1.21921	0.129593					YBL008W	YBL008W	36.5649	29.939	1.22131	0.157581					YBR076W	YBR076W	37.1437	30.6438	1.21211	0.137725
YJL209W	YJL209W	31.868	26.1388	1.21918	0.129036					YDL024C	YDL024C	36.3713	29.7808	1.2213	0.157381					YCR007C	YCR007C	35.3171	29.1369	1.21211	0.137627
YOR186W	YOR186W	33.6987	27.641	1.21915	0.128487					YGR197C	YGR197C	37.1641	30.4304	1.22128	0.157019					YIL148W	YIL148W	38.3013	31.599	1.2121	0.13752
YJR140C	YJR140C	34.5954	28.3767	1.21915	0.128437					YKL214C	YKL214C	35.1612	28.7904	1.22128	0.157004					YNL077W	YNL077W	36.2008	29.8663	1.21209	0.13735
YCR089W	YCR089W	33.3476	27.3536	1.21913	0.128023					YDL237W	YDL237W	35.4252	29.0074	1.22125	0.15638					YOR104W	YOR104W	36.7369	30.3087	1.21209	0.137266
YDL241W	YDL241W	32.9099	26.9947	1.21912	0.127903					YMR162C	YMR162C	35.5987	29.1498	1.22123	0.156047					YNL159C	YNL159C	34.7136	28.6401	1.21206	0.136753
YEL017W	YEL017W	33.4703	27.4548	1.2191	0.127522					YKL102C	YKL102C	37.1112	30.3889	1.22121	0.155668					YPL136W	YPL136W	35.4752	29.2693	1.21203	0.136099
YPL220W	YPL220W	34.8629	28.5972	1.2191	0.127479					YAL048C	YAL048C	36.0074	29.4863	1.22115	0.154594					YDR528W	YDR528W	37.3454	30.8123	1.21203	0.136047
YOR084W	YOR084W	33.8537	27.7695	1.2191	0.127384					YGR053C	YGR053C	34.5765	28.315	1.22114	0.154251					YBL082C	YBL082C	36.4775	30.0965	1.21202	0.135911
YGL160W	YGL160W	33.4469	27.4359	1.21909	0.127316					YDR181C	YDR181C	35.4233	29.0086	1.22113	0.154182					YDR239C	YDR239C	35.9147	29.6323	1.21201	0.135744
YGL125W	YGL125W	32.4352	26.606	1.21909	0.127297					YBR108W	YBR108W	35.8853	29.387	1.22113	0.154127					YNL275W	YNL275W	35.3651	29.1789	1.21201	0.135662
YLL033W	YLL033W	32.6798	26.807	1.21908	0.126976					YCR101C	YCR101C	35.8223	29.3356	1.22112	0.153923					YBR232C	YBR232C	36.6792	30.2635	1.212	0.13546
YNL077W	YNL077W	33.518	27.4952	1.21905	0.126468					YDL169C	YDL169C	35.4436	29.0259	1.2211	0.153556					YHR180W	YHR180W	35.7331	29.4829	1.21199	0.135347
YPL163C	YPL163C	32.7157	26.8373	1.21904	0.126199					YDL182W	YDL182W	37.8518	30.9987	1.22108	0.153122					YMR058W	YMR058W	38.321	31.6183	1.21199	0.135308
YDR537C	YDR537C	33.5444	27.5172	1.21903	0.12607					YBL069W	YBL069W	34.5542	28.2984	1.22107	0.152944					YMR110C	YMR110C	36.2627	29.9205	1.21197	0.134865
YPL200W	YPL200W	33.5351	27.5097	1.21903	0.125972					YDR440W	YDR440W	36.8523	30.1809	1.22105	0.152615					YJL084C	YJL084C	35.6822	29.4418	1.21196	0.134684
YKL131W	YKL131W	33.7808	27.7118	1.219	0.125527					YDR186C	YDR186C	36.2497	29.6874	1.22105	0.152548					YNL164C	YNL164C	34.7838	28.7007	1.21195	0.134581
YER081W	YER081W	33.2256	27.2563	1.219	0.125525					YOL150C	YOL150C	35.4716	29.0504	1.22104	0.152361					YNL067W	YNL067W	34.6228	28.5691	1.2119	0.133508
YBR030W	YBR030W	33.0196	27.0877	1.21899	0.125267					YPR043W	YPR043W	37.1144	30.3961	1.22103	0.152163					YBR156C	YBR156C	35.6326	29.4029	1.21187	0.13305
YGR146C	YGR146C	32.128	26.3567	1.21897	0.1249					YKL017C	YKL017C	36.5742	29.9538	1.22102	0.151999					YDL050C	YDL050C	37.0236	30.5512	1.21185	0.132668
YNL010W	YNL010W	33.5415	27.5164	1.21896	0.124745					YGR039W	YGR039W	35.0473	28.7039	1.221	0.151591					YLL019C	YLL019C	35.8881	29.6154	1.21181	0.131743
YOR142W	YOR142W	34.7432	28.5023	1.21896	0.124653					YKR005C	YKR005C	34.8223	28.52	1.22098	0.151313					YCR105W	YCR105W	35.2381	29.0796	1.21178	0.131287
YNL332W	YNL332W	33.8363	27.7588	1.21894	0.124304					YNL165W	YNL165W	36.0658	29.5384	1.22098	0.151248					YPR072W	YPR072W	35.8554	29.5895	1.21176	0.130861
YMR256C	YMR256C	31.0485	25.4718	1.21894	0.124234					YIL027C	YIL027C	36.3647	29.7835	1.22097	0.151068					YOR105W	YOR105W	36.5031	30.1241	1.21176	0.130798
YBR295W	YBR295W	36.3555	29.8258	1.21893	0.124052					YFR045W	YFR045W	36.9348	30.2509	1.22095	0.150712					YNL242W	YNL242W	37.1428	30.6522	1.21175	0.130642
YNL253W	YNL253W	33.1918	27.2304	1.21893	0.124016					YER049W	YER049W	35.926	29.4262	1.22088	0.149471					YMR313C	YMR313C	36.5118	30.1315	1.21175	0.13062
YNL288W	YNL288W	32.0073	26.2597	1.21888	0.123042					YAL017W	YAL017W	35.9992	29.4867	1.22086	0.149059					YDR018C	YDR018C	35.5731	29.357	1.21174	0.130455
YJL027C	YJL027C	33.4369	27.4327	1.21887	0.122881					YKL062W	YKL062W	36.8947	30.2206	1.22085	0.1488					YOR263C	YOR263C	36.9651	30.5059	1.21174	0.13038
YOR215C	YOR215C	33.1951	27.2344	1.21887	0.122802					YOL015W	YOL015W	35.8513	29.3668	1.22081	0.148095					YKL073W	YKL073W	37.29	30.7742	1.21173	0.130271
YHR185C	YHR185C	33.9525	27.8569	1.21882	0.121862					YNL205C	YNL205C	35.2815	28.9001	1.22081	0.148072					YEL009C	YEL009C	35.9379	29.6585	1.21172	0.130122
YOR184W	YOR184W	34.3017	28.1434	1.21882	0.121841					YDR360W	YDR360W	36.039	29.5208	1.2208	0.147884					YML106W	YML106W	36.4123	30.0506	1.2117	0.129732
YER177W	YER177W	32.9248	27.014	1.2188	0.121582					YKR098C	YKR098C	35.5191	29.0949	1.2208	0.14788					YBL088C	YBL088C	36.6856	30.2764	1.21169	0.12949
YCR017C	YCR017C	35.0599	28.7659	1.2188	0.121537					YDR321W	YDR321W	36.7005	30.0628	1.22079	0.147769					YGL146C	YGL146C	35.9305	29.6535	1.21168	0.129256
YHL006C	YHL006C	32.5677	26.7211	1.2188	0.121437					YGR194C	YGR194C	33.8631	27.7389	1.22078	0.147529					YPL195W	YPL195W	34.5022	28.4748	1.21167	0.129143
YOL155C	YOL155C	33.6889	27.6417	1.21877	0.120899					YJL110C	YJL110C	34.761	28.4746	1.22077	0.147333					YOR248W	YOR248W	37.1197	30.6354	1.21166	0.128912
YGL237C	YGL237C	31.8749	26.1535	1.21876	0.120682					YLR251W	YLR251W	38.9068	31.8707	1.22077	0.147292					YDR420W	YDR420W	37.1336	30.6477	1.21163	0.128241
YGL126W	YGL126W	34.6762	28.4522	1.21875	0.120572					YLR126C	YLR126C	36.3539	29.7795	1.22077	0.14729					YGR208W	YGR208W	35.9262	29.6516	1.21161	0.12789
YBR119W	YBR119W	32.9913	27.07	1.21874	0.120258					YDR056C	YDR056C	36.4266	29.8393	1.22076	0.147108					YGL082W	YGL082W	34.7762	28.7028	1.2116	0.127698
YBL100C	YBL100C	33.3577	27.3715	1.2187	0.119528					YGL143C	YGL143C	35.3881	28.9887	1.22075	0.147006					YLR012C	YLR012C	37.427	30.8909	1.21159	0.127484
YHR120W	YHR120W	31.6204	25.946	1.2187	0.119522					YNL166C	YNL166C	36.1531	29.6156	1.22075	0.146882					YOL059W	YOL059W	37.6213	31.0514	1.21158	0.12744
YLL019C	YLL019C	33.8041	27.7378	1.2187	0.119497					YGL161C	YGL161C	35.3802	28.9824	1.22075	0.146877					YNL212W	YNL212W	35.7773	29.5299	1.21156	0.126985
YJL038C	YJL038C	32.7644	26.8852	1.21868	0.119065					YNL187W	YNL187W	35.6013	29.1636	1.22074	0.146809					YHL030W	YHL030W	35.7215	29.4841	1.21155	0.126819
YBL069W	YBL069W	32.7192	26.8487	1.21865	0.118599					YML013C-A	YML013C-A	36.5274	29.9224	1.22074	0.146721					YNL268W	YNL268W	35.8792	29.6149	1.21153	0.126316
YPL262W	YPL262W	33.5282	27.5128	1.21864	0.118331					YPL002C	YPL002C	36.6258	30.0032	1.22073	0.146553					YMR056C	YMR056C	36.1509	29.8395	1.21151	0.125997
YDL186W	YDL186W	32.7156	26.846	1.21864	0.118317					YNL283C	YNL283C	34.4858	28.2502	1.22073	0.146513					YOR154W	YOR154W	36.7916	30.3684	1.21151	0.125969
YLR226W	YLR226W	33.5212	27.5079	1.2186	0.117558					YNL314W	YNL314W	35.8163	29.3402	1.22073	0.146509					YAL034C	YAL034C	36.2447	29.9173	1.2115	0.125701
YHR157W	YHR157W	33.613	27.5839	1.21857	0.116948					YDL239C	YDL239C	36.0581	29.5389	1.2207	0.145974					YEL038W	YEL038W	36.5486	30.1685	1.21148	0.12544
YML005W	YML005W	32.2034	26.4275	1.21856	0.116653					YBR159W	YBR159W	36.0578	29.5387	1.2207	0.145924					YDR405W	YDR405W	34.9087	28.815	1.21148	0.125324
YDR020C	YDR020C	32.3295	26.531	1.21856	0.116652					YIL148W	YIL148W	37.6445	30.8399	1.22064	0.14492					YDR120C	YDR120C	36.26	29.9306	1.21147	0.125214
YDR332W	YDR332W	33.5306	27.5174	1.21852	0.116006					YPR046W	YPR046W	37.1199	30.4105	1.22063	0.144599					YDR354W	YDR354W	35.4733	29.2813	1.21146	0.125114
YIL119C	YIL119C	33.3651	27.382	1.2185	0.115616					YOL037C	YOL037C	35.7527	29.2908	1.22061	0.144331					YPR037C	YPR037C	35.0521	28.9337	1.21146	0.125054
YGR276C	YGR276C	33.8503	27.7803	1.2185	0.11554					YER166W	YER166W	36.9245	30.2512	1.2206	0.144021					YDR482C	YDR482C	37.3377	30.8205	1.21146	0.124931
YMR205C	YMR205C	35.2599	28.9374	1.21849	0.115285					YCR059C	YCR059C	35.5607	29.134	1.22059	0.14391					YDL068W	YDL068W	34.8641	28.7791	1.21144	0.124554
YPR083W	YPR083W	33.7143	27.6693	1.21847	0.115011					YDR309C	YDR309C	36.165	29.6292	1.22058	0.143813					YNL253W	YNL253W	35.9719	29.6941	1.21142	0.124162
YPR050C	YPR050C	34.3612	28.201	1.21844	0.114315					YBR208C	YBR208C	36.1253	29.597	1.22057	0.143628					YLR453C	YLR453C	37.0826	30.6117	1.21139	0.123628
YPL050C	YPL050C	32.472	26.6508	1.21843	0.114059					YLR263W	YLR263W	35.5317	29.1117	1.22053	0.142737					YFR032C	YFR032C	35.7626	29.5222	1.21138	0.123491
YBR016W	YBR016W	35.4727	29.1142	1.2184	0.113532					YBR189W	YBR189W	35.1201	28.775	1.22051	0.142341					YJR153W	YJR153W	35.1727	29.0362	1.21134	0.1227
YOR384W	YOR384W	33.9001	27.8235	1.2184	0.113514					YBR092C	YBR092C	38.0317	31.161	1.22049	0.141992					YPL053C	YPL053C	36.5681	30.1883	1.21133	0.122497
YAL022C	YAL022C	33.4323	27.4397	1.21839	0.113336					YGL252C	YGL252C	36.2558	29.7061	1.22048	0.141899					YKR051W	YKR051W	35.3928	29.2182	1.21133	0.12242
YJL170C	YJL170C	33.4557	27.4597	1.21836	0.112756					YFL052W	YFL052W	35.5325	29.1138	1.22047	0.141638					YHL002W	YHL002W	35.4452	29.2615	1.21132	0.122369
YIL064W	YIL064W	34.5593	28.3655	1.21836	0.112703					YFL049W	YFL049W	37.6831	30.8762	1.22046	0.141431					YKL191W	YKL191W	37.9639	31.3414	1.2113	0.121988
YMR015C	YMR015C	32.4491	26.6343	1.21832	0.111997					YMR181C	YMR181C	36.3878	29.8154	1.22044	0.14099					YPL035C	YPL035C	34.3268	28.3388	1.2113	0.121886
YKL191W	YKL191W	35.1908	28.8851	1.2183	0.111673					YMR119W	YMR119W	35.635	29.1995	1.2204	0.14027					YER041W	YER041W	36.6028	30.2189	1.21125	0.121018
YHR137W	YHR137W	34.1702	28.0476	1.21829	0.111438					YDR445C	YDR445C	35.4105	29.0157	1.22039	0.140182					YHR110W	YHR110W	36.1327	29.8314	1.21123	0.120597
YER024W	YER024W	34.0357	27.9373	1.21829	0.111344					YDR244W	YDR244W	37.0686	30.3748	1.22037	0.139783					YPL025C	YPL025C	35.6454	29.4291	1.21123	0.120548
YOR030W	YOR030W	34.19	28.0646	1.21826	0.110796					YJR102C	YJR102C	36.2518	29.7056	1.22037	0.139739					YKR023W	YKR023W	36.6111	30.2268	1.21121	0.12018
YIL002C	YIL002C	33.8327	27.7714	1.21826	0.110736					YER144C	YER144C	36.158	29.6288	1.22036	0.139649					YOR277C	YOR277C	36.0917	29.7983	1.2112	0.120018
YNR039C	YNR039C	32.6209	26.7772	1.21824	0.1103					YDR322W	YDR322W	37.2353	30.5119	1.22035	0.139436					YGR213C	YGR213C	34.9319	28.8412	1.21118	0.119635
YHL011C	YHL011C	30.3317	24.8982	1.21823	0.110169					YGR240C	YGR240C	35.8028	29.3381	1.22035	0.139434					YKR077W	YKR077W	36.6674	30.2747	1.21116	0.119172
YDL131W	YDL131W	34.304	28.1589	1.21823	0.110135					YOR058C	YOR058C	36.802	30.157	1.22035	0.1393					YGL110C	YGL110C	35.8373	29.5893	1.21116	0.119165
YPR132W	YPR132W	33.6103	27.5898	1.21821	0.109835					YKR036C	YKR036C	35.9918	29.4934	1.22033	0.139041					YNL166C	YNL166C	34.8551	28.7791	1.21113	0.118525
YLR438W	YLR438W	34.377	28.2197	1.21819	0.10943					YLR207W	YLR207W	34.9355	28.6292	1.22027	0.137954					YKL151C	YKL151C	35.2605	29.1144	1.2111	0.118088
YER005W	YER005W	34.5557	28.3665	1.21819	0.109369					YKR051W	YKR051W	36.5289	29.9351	1.22027	0.137912					YLR114C	YLR114C	35.5804	29.3786	1.2111	0.118018
YOR191W	YOR191W	34.1248	28.013	1.21818	0.109171					YOR247W	YOR247W	36.858	30.2049	1.22026	0.137752					YPL222W	YPL222W	38.7044	31.9581	1.2111	0.118012
YGL114W	YGL114W	34.0527	27.9539	1.21817	0.109014					YBR213W	YBR213W	35.0969	28.762	1.22025	0.137547					YKR036C	YKR036C	35.7401	29.5106	1.21109	0.117902
YCR060W	YCR060W	32.6446	26.7985	1.21815	0.108538					YGR087C	YGR087C	36.4562	29.876	1.22025	0.137484					YER055C	YER055C	35.5617	29.3633	1.21109	0.117889
YPL244C	YPL244C	33.3178	27.3513	1.21814	0.108476					YDR165W	YDR165W	34.8785	28.5835	1.22023	0.137122					YKR089C	YKR089C	36.2386	29.9224	1.21109	0.117781
YGL110C	YGL110C	33.4671	27.4742	1.21813	0.108156					YJR137C	YJR137C	36.5016	29.9142	1.22021	0.136709					YKL215C	YKL215C	35.4183	29.2452	1.21108	0.117644
YCR045C	YCR045C	37.8602	31.0807	1.21813	0.10812					YBL088C	YBL088C	37.1697	30.4623	1.22019	0.136311					YIR036C	YIR036C	35.8244	29.5808	1.21107	0.117435
YLR268W	YLR268W	36.6435	30.0826	1.21809	0.107507					YJR026W	YJR026W	35.3949	29.0078	1.22019	0.136291					YGL056C	YGL056C	35.9037	29.6469	1.21104	0.11695
YKL190W	YKL190W	34.7735	28.5477	1.21809	0.107345					YGL086W	YGL086W	34.6283	28.3801	1.22016	0.135807					YGR134W	YGR134W	36.698	30.3037	1.21101	0.116226
YEL012W	YEL012W	32.7681	26.9013	1.21809	0.107326					YNL009W	YNL009W	35.7082	29.2652	1.22016	0.135771					YHR132C	YHR132C	35.7487	29.5202	1.21099	0.115879
YFR045W	YFR045W	33.3713	27.3965	1.21808	0.107314					YOL092W	YOL092W	36.2036	29.6721	1.22012	0.135085					YGR286C	YGR286C	36.0458	29.7661	1.21097	0.115501
YER108C	YER108C	33.8729	27.8086	1.21808	0.107135					YLR178C	YLR178C	36.2244	29.6893	1.22012	0.134975					YAL007C	YAL007C	36.8927	30.4657	1.21096	0.115261
YLR055C	YLR055C	33.3822	27.4068	1.21803	0.106201					YMR254C	YMR254C	35.3308	28.9577	1.22008	0.134295					YBR105C	YBR105C	35.8078	29.5702	1.21094	0.114979
YNL140C	YNL140C	33.6562	27.6318	1.21802	0.106127					YLL014W	YLL014W	37.4903	30.7277	1.22008	0.134292					YHR125W	YHR125W	36.387	30.0495	1.2109	0.114192
YJR137C	YJR137C	34.4755	28.3047	1.21801	0.105903					YGL176C	YGL176C	36.267	29.7256	1.22006	0.133855					YNL024C	YNL024C	35.4281	29.258	1.21089	0.113867
YDR139C	YDR139C	32.27	26.495	1.21796	0.104911					YER045C	YER045C	35.804	29.3462	1.22006	0.133824					YKR059W	YKR059W	36.1724	29.8734	1.21086	0.113286
YGL082W	YGL082W	32.7534	26.892	1.21796	0.10483					YER109C	YER109C	36.7855	30.1508	1.22005	0.133685					YDR463W	YDR463W	36.8234	30.4124	1.2108	0.112225
YCR106W	YCR106W	33.6238	27.6069	1.21795	0.104665					YER095W	YER095W	37.5313	30.7623	1.22004	0.133558					YDR338C	YDR338C	37.1021	30.6428	1.21079	0.112082
YIR028W	YIR028W	32.7778	26.9125	1.21794	0.104463					YDR420W	YDR420W	37.0232	30.3466	1.22001	0.132951					YIL015C-A	YIL015C-A	36.2293	29.9223	1.21078	0.111804
YKL147C	YKL147C	32.306	26.5252	1.21794	0.10443					YPL272C	YPL272C	36.6636	30.052	1.22001	0.132852					YOL152W	YOL152W	37.0001	30.5595	1.21076	0.111384
YNL196C	YNL196C	32.7794	26.9142	1.21793	0.104156					YDR026C	YDR026C	36.3609	29.804	1.22	0.13273					YDL079C	YDL079C	35.2562	29.12	1.21072	0.110651
YPL112C	YPL112C	32.5017	26.6864	1.21791	0.103909					YBL067C	YBL067C	36.439	29.8684	1.21999	0.132472					YCR102C	YCR102C	35.6466	29.4425	1.21072	0.110622
YNL037C	YNL037C	33.3038	27.3454	1.21789	0.103527					YMR129W	YMR129W	36.42	29.8529	1.21998	0.132429					YDR011W	YDR011W	36.6333	30.259	1.21066	0.109422
YHR035W	YHR035W	32.8593	26.9806	1.21789	0.103391					YPR021C	YPR021C	37.4239	30.6759	1.21998	0.132322					YJR131W	YJR131W	37.1228	30.6637	1.21064	0.109168
YOR352W	YOR352W	33.2635	27.3129	1.21787	0.103037					YOR008C-A	YOR008C-A	35.4453	29.0552	1.21993	0.131408					YGL032C	YGL032C	35.1484	29.0332	1.21063	0.108848
YNL277W	YNL277W	33.8594	27.8021	1.21787	0.103035					YKL085W	YKL085W	35.3529	28.9797	1.21992	0.131193					YLL025W	YLL025W	36.0677	29.7929	1.21062	0.108599
YDR105C	YDR105C	34.9337	28.6844	1.21786	0.102917					YNL316C	YNL316C	35.3999	29.0191	1.21988	0.130497					YOR033C	YOR033C	36.0462	29.7751	1.21061	0.108558
YPL199C	YPL199C	34.7619	28.5434	1.21786	0.102861					YDR278C	YDR278C	36.9165	30.2634	1.21984	0.129685					YER038W-A	YER038W-A	36.3603	30.0346	1.21061	0.108523
YKR034W	YKR034W	33.0199	27.1131	1.21786	0.102825					YOR136W	YOR136W	36.0286	29.5357	1.21983	0.129578					YER051W	YER051W	35.4204	29.2598	1.21055	0.107304
YOR093C	YOR093C	36.1687	29.6988	1.21785	0.102697					YER174C	YER174C	36.2025	29.6783	1.21983	0.129515					YGL063W	YGL063W	35.8734	29.6344	1.21053	0.106999
YOR037W	YOR037W	33.0867	27.1685	1.21783	0.102262					YBL019W	YBL019W	36.8581	30.2159	1.21982	0.129434					YDL180W	YDL180W	35.0361	28.9443	1.21046	0.105678
YIL056W	YIL056W	32.118	26.3734	1.21782	0.102034					YDR083W	YDR083W	35.2704	28.9146	1.21981	0.129199					YAL031C	YAL031C	36.463	30.1235	1.21045	0.105456
YAL043C-A	YAL043C-A	32.8798	26.9997	1.21778	0.101367					YIR018W	YIR018W	36.0778	29.5775	1.21977	0.128396					YGR275W	YGR275W	37.2727	30.7923	1.21045	0.105446
YBL019W	YBL019W	34.7229	28.5136	1.21777	0.101042					YNL281W	YNL281W	35.5981	29.1845	1.21976	0.128207					YDR278C	YDR278C	37.1203	30.6678	1.2104	0.104437
YBR047W	YBR047W	33.8521	27.7991	1.21774	0.100508					YOR243C	YOR243C	36.3044	29.765	1.2197	0.127087					YLR399C	YLR399C	42.5743	35.1742	1.21038	0.104118
YMR019W	YMR019W	33.4713	27.4865	1.21773	0.100369					YOR091W	YOR091W	35.9679	29.4898	1.21967	0.126559					YDR209C	YDR209C	36.5615	30.2068	1.21037	0.103857
YBR066C	YBR066C	34.8053	28.5824	1.21772	0.100056					YHR156C	YHR156C	37.928	31.0971	1.21966	0.12634					YBR032W	YBR032W	35.2941	29.1599	1.21036	0.103714
YPR167C	YPR167C	31.3382	25.7356	1.2177	0.0996082					YEL049W	YEL049W	36.5042	29.9303	1.21964	0.125939					YPL174C	YPL174C	35.6117	29.4224	1.21036	0.103637
YDR096W	YDR096W	34.312	28.1781	1.21768	0.0993709					YMR041C	YMR041C	34.5548	28.3323	1.21962	0.125636					YJR118C	YJR118C	35.5234	29.35	1.21034	0.10317
YBR139W	YBR139W	33.3925	27.4238	1.21765	0.0987073					YDL134C	YDL134C	37.0111	30.3466	1.21961	0.125447					YPL244C	YPL244C	36.1226	29.8451	1.21033	0.103117
YNR009W	YNR009W	33.8537	27.8026	1.21765	0.0986087					YAL034C	YAL034C	36.1463	29.6378	1.2196	0.125215					YDL040C	YDL040C	36.7887	30.3958	1.21032	0.102875
YML090W	YML090W	31.8451	26.1532	1.21764	0.098489					YLR286C	YLR286C	36.5306	29.9535	1.21958	0.124789					YLL033W	YLL033W	34.6207	28.6052	1.21029	0.102361
YCR034W	YCR034W	38.7175	31.7973	1.21763	0.0983861					YJL210W	YJL210W	35.3105	28.9532	1.21957	0.124664					YBR044C	YBR044C	37.9641	31.3677	1.21029	0.102312
YNR065C	YNR065C	33.5442	27.5487	1.21763	0.0983495					YKL084W	YKL084W	36.6831	30.079	1.21956	0.124403					YLR306W	YLR306W	35.4004	29.2496	1.21029	0.102253
YGR124W	YGR124W	34.2642	28.1406	1.2176	0.0978074					YGR259C	YGR259C	37.2849	30.5737	1.21951	0.123447					YLR102C	YLR102C	37.4234	30.921	1.21029	0.102253
YHR181W	YHR181W	32.1548	26.4087	1.21758	0.0973731					YGR100W	YGR100W	34.8156	28.549	1.21951	0.123394					YOR267C	YOR267C	37.1035	30.6572	1.21027	0.101886
YDR092W	YDR092W	34.8943	28.6588	1.21758	0.0972984					YOL155C	YOL155C	35.8057	29.3615	1.21948	0.122875					YOL159C	YOL159C	36.3788	30.0591	1.21024	0.101334
YOL027C	YOL027C	32.6022	26.7763	1.21758	0.0972369					YCR032W	YCR032W	35.934	29.4668	1.21948	0.122832					YBL070C	YBL070C	35.5792	29.3985	1.21024	0.101295
YJR078W	YJR078W	34.1069	28.0129	1.21754	0.0965756					YIL037C	YIL037C	35.7439	29.3109	1.21947	0.122808					YBR187W	YBR187W	35.5017	29.3348	1.21022	0.101013
YBL011W	YBL011W	33.858	27.8092	1.21751	0.0959045					YLR237W	YLR237W	35.2445	28.9022	1.21944	0.122137					YGL243W	YGL243W	36.0527	29.7902	1.21022	0.100912
YML047C	YML047C	33.3387	27.3829	1.2175	0.0957203					YGR023W	YGR023W	34.8723	28.5972	1.21943	0.121999					YGR244C	YGR244C	35.0999	29.0029	1.21022	0.100891
YPR084W	YPR084W	33.1655	27.2407	1.2175	0.0956458					YJL057C	YJL057C	34.9028	28.6231	1.21939	0.121265					YJL200C	YJL200C	36.7747	30.3868	1.21022	0.10087
YHR147C	YHR147C	33.5216	27.5334	1.21749	0.0955208					YNR064C	YNR064C	35.4434	29.0666	1.21938	0.121101					YGR149W	YGR149W	36.1667	29.8851	1.21019	0.100384
YLR332W	YLR332W	35.1059	28.8356	1.21745	0.0947226					YOR171C	YOR171C	34.9609	28.672	1.21934	0.120329					YDL114W	YDL114W	35.4527	29.2953	1.21018	0.100154
YPR157W	YPR157W	32.1836	26.4352	1.21745	0.0947171					YDR069C	YDR069C	35.8988	29.4416	1.21932	0.119927					YGR146C	YGR146C	35.4287	29.2756	1.21018	0.100067
YOL018C	YOL018C	31.7684	26.0947	1.21743	0.0943287					YDR020C	YDR020C	35.4047	29.0371	1.21929	0.119364					YGL262W	YGL262W	35.0558	28.9683	1.21014	0.099407
YKR040C	YKR040C	33.8464	27.802	1.21741	0.0938596					YAR018C	YAR018C	37.5421	30.7902	1.21929	0.119251					YOR055W	YOR055W	36.5955	30.2411	1.21012	0.099043
YOR135C	YOR135C	34.4126	28.2672	1.2174	0.0937725					YML074C	YML074C	36.4159	29.8674	1.21925	0.118621					YDL059C	YDL059C	36.9692	30.5504	1.21011	0.0986875
YDL146W	YDL146W	31.9043	26.2069	1.2174	0.0937081					YHR132C	YHR132C	36.003	29.5288	1.21925	0.118539					YPL202C	YPL202C	35.9535	29.7116	1.21009	0.0982942
YNR032C-A	YNR032C-A	33.3597	27.4026	1.21739	0.0935496					YML022W	YML022W	35.0989	28.7877	1.21923	0.118256					YOR229W	YOR229W	35.9233	29.6868	1.21008	0.0981604
YOR032C	YOR032C	33.0748	27.1687	1.21739	0.0934971					YOR079C	YOR079C	36.7662	30.1553	1.21923	0.118156					YLR456W	YLR456W	37.2905	30.8171	1.21006	0.097768
YLR444C	YLR444C	33.5461	27.5559	1.21738	0.0934407					YGR250C	YGR250C	35.9496	29.4858	1.21922	0.117945					YCL008C	YCL008C	37.4223	30.926	1.21006	0.0977624
YKL025C	YKL025C	36.2838	29.8051	1.21737	0.0931538					YLR050C	YLR050C	36.4698	29.9128	1.2192	0.117647					YDL086W	YDL086W	35.9258	29.6897	1.21004	0.0974478
YGR142W	YGR142W	32.8445	26.9805	1.21734	0.0925636					YHR139C-A	YHR139C-A	36.8753	30.2455	1.2192	0.117625					YGL036W	YGL036W	34.7041	28.6809	1.21001	0.0968577
YBR125C	YBR125C	33.3326	27.3816	1.21734	0.0924713					YPL191C	YPL191C	36.5703	29.9961	1.21917	0.11705					YMR004W	YMR004W	37.4934	30.9862	1.21	0.0966717
YCR085W	YCR085W	37.3494	30.6814	1.21733	0.092372					YOR062C	YOR062C	35.1698	28.8475	1.21916	0.116947					YHR044C	YHR044C	34.3081	28.3542	1.20998	0.0963333
YMR115W	YMR115W	32.7775	26.9262	1.21731	0.0919895					YJR004C	YJR004C	34.5121	28.3082	1.21916	0.116797					YPL274W	YPL274W	36.7242	30.3511	1.20998	0.0962117
YOL125W	YOL125W	34.6246	28.4437	1.2173	0.0918563					YHR039C	YHR039C	36.568	29.9945	1.21916	0.116785					YLR231C	YLR231C	36.0214	29.771	1.20995	0.095668
YOR386W	YOR386W	32.1979	26.4503	1.2173	0.0917358					YIL073C	YIL073C	35.9784	29.5112	1.21914	0.116574					YIR042C	YIR042C	36.0385	29.7861	1.20991	0.0949014
YBR212W	YBR212W	33.4144	27.45	1.21728	0.0914295					YDL131W	YDL131W	36.6748	30.0825	1.21914	0.116444					YKL067W	YKL067W	33.8347	27.9647	1.20991	0.0949012
YDR503C	YDR503C	33.3399	27.389	1.21728	0.0912999					YGL109W	YGL109W	36.8033	30.1888	1.2191	0.115767					YMR169C	YMR169C	36.0344	29.7828	1.20991	0.0948589
YCR059C	YCR059C	32.9454	27.0652	1.21726	0.0909788					YDR112W	YDR112W	35.8098	29.3741	1.2191	0.115639					YBL083C	YBL083C	37.0244	30.6013	1.2099	0.0946306
YPL195W	YPL195W	32.8787	27.0108	1.21724	0.0906578					YDR329C	YDR329C	36.4693	29.9152	1.21909	0.115518					YNL028W	YNL028W	35.6617	29.4754	1.20988	0.0943079
YER041W	YER041W	33.1431	27.2281	1.21724	0.0905375					YBL065W	YBL065W	36.414	29.8699	1.21909	0.115515					YDR503C	YDR503C	34.8465	28.8026	1.20984	0.0935253
YPR074C	YPR074C	35.1171	28.8506	1.21721	0.0899073					YDL176W	YDL176W	37.5156	30.7746	1.21904	0.114648					YDR096W	YDR096W	36.5423	30.2044	1.20984	0.0934399
YER028C	YER028C	32.8658	27.0015	1.21718	0.0894647					YOR001W	YOR001W	37.6976	30.9243	1.21903	0.114408					YLL001W	YLL001W	37.1418	30.7	1.20983	0.0933227
YLR450W	YLR450W	33.37	27.4167	1.21714	0.08865					YLR014C	YLR014C	36.6816	30.091	1.21902	0.114274					YER174C	YER174C	36.5912	30.2454	1.20981	0.0929803
YCR100C	YCR100C	33.4693	27.4983	1.21714	0.0885857					YNL253W	YNL253W	36.3138	29.7895	1.21902	0.114123					YGR124W	YGR124W	36.4904	30.1622	1.2098	0.0928235
YOR219C	YOR219C	32.8994	27.031	1.2171	0.087822					YGR014W	YGR014W	36.2968	29.7762	1.21898	0.113535					YBR285W	YBR285W	36.4694	30.1451	1.2098	0.0926591
YLR253W	YLR253W	31.4711	25.8577	1.21709	0.0875913					YOR220W	YOR220W	36.151	29.6572	1.21896	0.113078					YMR304W	YMR304W	36.3011	30.0062	1.20979	0.0924716
YCR027C	YCR027C	36.8225	30.2549	1.21708	0.0873071					YPR132W	YPR132W	35.2642	28.9299	1.21895	0.112949					YGR206W	YGR206W	36.0257	29.7789	1.20977	0.0921868
YIL105C	YIL105C	34.2388	28.1325	1.21706	0.086931					YER052C	YER052C	38.0899	31.2482	1.21895	0.112867					YGR070W	YGR070W	35.6317	29.4539	1.20975	0.0917226
YDR350C	YDR350C	33.5967	27.605	1.21705	0.0868164					YGL124C	YGL124C	34.8186	28.5647	1.21894	0.112638					YDR260C	YDR260C	38.8447	32.1102	1.20973	0.0913937
YKR097W	YKR097W	33.3215	27.3792	1.21704	0.0865747					YGL034C	YGL034C	36.3618	29.8315	1.21891	0.11208					YHL006C	YHL006C	35.4398	29.296	1.20971	0.0910774
YBR210W	YBR210W	32.6597	26.8361	1.217	0.0859074					YNL202W	YNL202W	36.0518	29.5773	1.2189	0.111971					YBL085W	YBL085W	35.2622	29.1493	1.20971	0.0910073
YGR125W	YGR125W	32.8172	26.9659	1.21699	0.0856018					YGL032C	YGL032C	35.0376	28.7453	1.2189	0.111874					YER001W	YER001W	36.4034	30.0932	1.20969	0.0906238
YDL101C	YDL101C	36.1443	29.6999	1.21698	0.0855108					YNL076W	YNL076W	37.0773	30.4188	1.21889	0.111796					YGL057C	YGL057C	34.4384	28.469	1.20968	0.0904619
YOL057W	YOL057W	32.4504	26.6646	1.21698	0.085501					YER117W	YER117W	35.9537	29.4971	1.21889	0.111682					YOL033W	YOL033W	34.8741	28.8295	1.20967	0.0902058
YPL133C	YPL133C	33.5679	27.5831	1.21697	0.0853057					YGL117W	YGL117W	35.2382	28.9107	1.21886	0.11128					YKL065C	YKL065C	38.2351	31.608	1.20966	0.0901058
YHL024W	YHL024W	33.0371	27.147	1.21697	0.085231					YDR015C	YDR015C	36.2107	29.71	1.2188	0.110145					YDL129W	YDL129W	37.0091	30.5953	1.20963	0.0894618
YNR014W	YNR014W	33.3627	27.4146	1.21697	0.0852036					YHR178W	YHR178W	38.0361	31.2081	1.21879	0.109847					YOR099W	YOR099W	37.4515	30.9619	1.2096	0.0888925
YPL253C	YPL253C	33.662	27.6606	1.21697	0.0851336					YBR031W	YBR031W	35.0454	28.7544	1.21878	0.109733					YNL098C	YNL098C	36.7809	30.4075	1.2096	0.0888426
YBL086C	YBL086C	34.2749	28.1643	1.21696	0.0851085					YPL003W	YPL003W	36.0688	29.5941	1.21878	0.109716					YGR139W	YGR139W	36.1088	29.8523	1.20958	0.0885312
YML072C	YML072C	34.6694	28.4885	1.21696	0.0850713					YGL262W	YGL262W	35.1619	28.8513	1.21873	0.108722					YKR039W	YKR039W	35.8537	29.6414	1.20958	0.0884899
YER188W	YER188W	33.8768	27.8373	1.21696	0.084967					YGR117C	YGR117C	35.6287	29.2353	1.21869	0.10799					YIL099W	YIL099W	35.7862	29.5859	1.20957	0.0882337
YPR095C	YPR095C	32.9836	27.1036	1.21695	0.0847875					YDL069C	YDL069C	33.8698	27.7921	1.21869	0.107904					YDL104C	YDL104C	34.5961	28.6027	1.20954	0.087754
YJL060W	YJL060W	32.425	26.6446	1.21695	0.0847831					YDR092W	YDR092W	35.9901	29.5334	1.21862	0.106691					YGR121C	YGR121C	34.9154	28.8669	1.20953	0.0874807
YML038C	YML038C	32.8199	26.9692	1.21694	0.0845839					YAL061W	YAL061W	36.0553	29.5878	1.21859	0.106006					YER161C	YER161C	38.0869	31.4891	1.20953	0.0874143
YDR219C	YDR219C	31.9216	26.2323	1.21688	0.0834734					YPL267W	YPL267W	35.7967	29.3756	1.21858	0.105979					YBR208C	YBR208C	35.6453	29.4705	1.20952	0.087408
YHL039W	YHL039W	33.5004	27.5298	1.21688	0.0834123					YLR448W	YLR448W	33.9827	27.888	1.21854	0.105178					YGR089W	YGR089W	35.2209	29.1197	1.20952	0.0873465
YCR087C-A	YCR087C-A	36.7384	30.1916	1.21684	0.0826692					YDR178W	YDR178W	35.6982	29.2963	1.21852	0.104793					YCR082W	YCR082W	35.2651	29.1565	1.20951	0.087143
YNL315C	YNL315C	33.4582	27.4963	1.21683	0.082363					YLR179C	YLR179C	35.5665	29.1899	1.21846	0.103534					YNR066C	YNR066C	35.1187	29.0357	1.2095	0.0869609
YLR209C	YLR209C	32.3809	26.6111	1.21682	0.0823047					YHL039W	YHL039W	35.3956	29.0501	1.21843	0.10313					YPL062W	YPL062W	35.0671	28.9935	1.20948	0.0865853
YMR164C	YMR164C	32.6592	26.8403	1.2168	0.0818409					YBR013C	YBR013C	35.925	29.4849	1.21842	0.102884					YPL207W	YPL207W	37.0758	30.6547	1.20946	0.0862356
YBL088C	YBL088C	34.6373	28.4666	1.21677	0.0812944					YOR133W	YOR133W	36.5781	30.021	1.21842	0.102799					YLL052C	YLL052C	37.273	30.8179	1.20946	0.0860921
YPL274W	YPL274W	35.1262	28.8684	1.21677	0.0812911					YDR317W	YDR317W	36.6608	30.0894	1.2184	0.102436					YJL006C	YJL006C	41.0761	33.9641	1.2094	0.0849263
YNL276C	YNL276C	34.2639	28.1604	1.21674	0.080724					YOL065C	YOL065C	36.5794	30.0231	1.21837	0.101983					YCR066W	YCR066W	39.1206	32.3487	1.20934	0.0838774
YBR107C	YBR107C	33.4409	27.484	1.21674	0.0807101					YNR057C	YNR057C	34.9211	28.6624	1.21836	0.10176					YPL161C	YPL161C	38.0863	31.4934	1.20934	0.0838141
YIL009C-A	YIL009C-A	34.8859	28.6727	1.21669	0.0797664					YNL082W	YNL082W	36.5614	30.0087	1.21836	0.10171					YGL227W	YGL227W	35.3376	29.2211	1.20932	0.0834169
YDL229W	YDL229W	34.2474	28.149	1.21665	0.0788319					YBR058C	YBR058C	38.1572	31.3191	1.21834	0.101264					YGR287C	YGR287C	37.3681	30.9003	1.20931	0.0832624
YIL041W	YIL041W	32.9354	27.0713	1.21662	0.0782852					YJL126W	YJL126W	35.7178	29.3172	1.21832	0.101031					YOL013C	YOL013C	35.361	29.2409	1.2093	0.0830744
YDL005C	YDL005C	35.3495	29.0557	1.21661	0.0780685					YOL059W	YOL059W	37.7231	30.9633	1.21832	0.100969					YHR039C	YHR039C	36.7263	30.37	1.2093	0.0829954
YNL212W	YNL212W	33.1706	27.2649	1.21661	0.0780252					YJL171C	YJL171C	35.8497	29.4265	1.21828	0.100262					YBR013C	YBR013C	35.7693	29.579	1.20928	0.0827115
YGL053W	YGL053W	33.2086	27.2962	1.2166	0.0778613					YPR091C	YPR091C	35.973	29.5277	1.21828	0.100245					YCL051W	YCL051W	38.159	31.5559	1.20925	0.0821322
YLR152C	YLR152C	34.4637	28.3281	1.21659	0.0777545					YOR131C	YOR131C	36.9461	30.3274	1.21824	0.0995313					YIL136W	YIL136W	36.5403	30.2175	1.20924	0.0819336
YJR030C	YJR030C	31.2481	25.685	1.21659	0.0776931					YIL160C	YIL160C	37.4781	30.7643	1.21823	0.0992972					YHR114W	YHR114W	36.3649	30.0728	1.20923	0.0816406
YGR003W	YGR003W	33.8622	27.834	1.21658	0.0774837					YJL134W	YJL134W	34.9803	28.7141	1.21823	0.0992109					YKL025C	YKL025C	39.0131	32.264	1.20918	0.0807901
YGR088W	YGR088W	32.0689	26.3609	1.21653	0.0765736					YJL154C	YJL154C	35.3135	28.9877	1.21822	0.0991517					YEL003W	YEL003W	37.9885	31.4168	1.20918	0.0806391
YHR155W	YHR155W	34.3664	28.2496	1.21653	0.0764398					YDR502C	YDR502C	35.3791	29.0417	1.21822	0.0990222					YGL126W	YGL126W	37.0243	30.6199	1.20916	0.0802393
YBR022W	YBR022W	32.329	26.5753	1.21651	0.0760226					YOL141W	YOL141W	33.2743	27.314	1.21821	0.0989354					YLR013W	YLR013W	36.6384	30.3009	1.20915	0.0801781
YDR509W	YDR509W	34.0681	28.0051	1.2165	0.0758565					YBR068C	YBR068C	36.3187	29.8132	1.21821	0.0988629					YML032C	YML032C	39.9974	33.0789	1.20915	0.0801017
YIR042C	YIR042C	32.9677	27.1014	1.21646	0.0750338					YLL051C	YLL051C	36.7399	30.1592	1.2182	0.0986532					YCL045C	YCL045C	37.6588	31.1449	1.20915	0.0800942
YBL068W	YBL068W	34.0631	28.002	1.21645	0.0749767					YKL034W	YKL034W	35.158	28.8609	1.21819	0.0984772					YDL109C	YDL109C	36.2584	29.9868	1.20915	0.080087
YIL094C	YIL094C	33.2945	27.3707	1.21643	0.0744575					YPR029C	YPR029C	37.2382	30.5686	1.21818	0.0983836					YGR164W	YGR164W	36.1915	29.9315	1.20915	0.0800341
YMR024W	YMR024W	32.3676	26.6091	1.21641	0.0741673					YGL209W	YGL209W	36.7631	30.1789	1.21818	0.0982365					YBR294W	YBR294W	35.6686	29.4991	1.20914	0.0799647
YKL215C	YKL215C	33.2086	27.3011	1.21639	0.0736398					YLR094C	YLR094C	36.1547	29.6796	1.21817	0.0981077					YMR038C	YMR038C	38.2226	31.6113	1.20914	0.0799465
YKR092C	YKR092C	32.836	26.9952	1.21636	0.0731903					YGL121C	YGL121C	36.3545	29.8444	1.21813	0.0974451					YGR015C	YGR015C	36.3353	30.0507	1.20913	0.0797979
YBR051W	YBR051W	32.7766	26.947	1.21634	0.0726636					YLR369W	YLR369W	37.1043	30.4601	1.21813	0.0973535					YPR164W	YPR164W	37.8018	31.2637	1.20913	0.0797018
YBL096C	YBL096C	33.1199	27.2293	1.21633	0.0726247					YIR014W	YIR014W	35.7157	29.3203	1.21812	0.0972201					YDR234W	YDR234W	36.3418	30.0562	1.20913	0.0796921
YLR031W	YLR031W	33.9223	27.8891	1.21633	0.0725131					YLR139C	YLR139C	36.1133	29.6467	1.21812	0.0972007					YLL041C	YLL041C	37.2848	30.8364	1.20912	0.0794861
YJR035W	YJR035W	33.3321	27.404	1.21632	0.0723911					YBL012C	YBL012C	33.9872	27.9015	1.21811	0.0970349					YGR123C	YGR123C	34.8893	28.8553	1.20911	0.0794059
YKL103C	YKL103C	33.725	27.727	1.21632	0.0723533					YNL010W	YNL010W	35.5487	29.1838	1.2181	0.0968065					YOL057W	YOL057W	34.7649	28.7539	1.20905	0.0781766
YCR076C	YCR076C	32.5805	26.7862	1.21632	0.0723329					YEL043W	YEL043W	36.2439	29.7549	1.21808	0.096439					YGL224C	YGL224C	36.7282	30.3788	1.20901	0.0773742
YJR009C	YJR009C	32.9875	27.1209	1.21631	0.0722068					YOR242C	YOR242C	36.526	29.9868	1.21807	0.0962689					YML017W	YML017W	37.3339	30.8801	1.209	0.0771161
YGR012W	YGR012W	32.4623	26.6896	1.21629	0.0717458					YLR225C	YLR225C	35.27	28.9559	1.21806	0.0960347					YLR121C	YLR121C	34.814	28.7971	1.20894	0.076089
YLR420W	YLR420W	33.417	27.4747	1.21628	0.071579					YBL029W	YBL029W	36.0164	29.5692	1.21804	0.0956318					YMR196W	YMR196W	35.1551	29.0794	1.20894	0.0759909
YMR003W	YMR003W	32.8317	26.9936	1.21628	0.0714585					YPR166C	YPR166C	33.9532	27.8753	1.21804	0.0955929					YMR250W	YMR250W	35.4181	29.2974	1.20892	0.0755665
YNL116W	YNL116W	33.1513	27.2564	1.21627	0.0714329					YGR050C	YGR050C	35.126	28.8383	1.21803	0.0955398					YFR046C	YFR046C	36.3212	30.0449	1.2089	0.0752235
YDR348C	YDR348C	34.991	28.7697	1.21625	0.0708901					YDL012C	YDL012C	36.6456	30.0868	1.218	0.094878					YDR181C	YDR181C	35.702	29.5334	1.20887	0.0746155
YJL006C	YJL006C	37.6325	30.9416	1.21624	0.0707651					YBL056W	YBL056W	35.7997	29.3924	1.21799	0.0947792					YJR128W	YJR128W	36.237	29.9761	1.20886	0.0745478
YHR191C	YHR191C	40.2506	33.0948	1.21622	0.0703846					YGL042C	YGL042C	36.2039	29.7244	1.21799	0.094678					YKL120W	YKL120W	36.4612	30.1616	1.20886	0.0745063
YER032W	YER032W	34.9144	28.7093	1.21614	0.0687415					YMR040W	YMR040W	34.5701	28.3833	1.21797	0.0943758					YOL079W	YOL079W	34.7153	28.7177	1.20885	0.0741936
YOR066W	YOR066W	35.8476	29.4766	1.21614	0.0687134					YER185W	YER185W	36.2069	29.7273	1.21797	0.0943264					YBR271W	YBR271W	36.2066	29.9519	1.20882	0.0737777
YNL295W	YNL295W	33.0569	27.1823	1.21612	0.0683592					YEL040W	YEL040W	37.1916	30.5361	1.21795	0.0940411					YPR051W	YPR051W	38.3892	31.7577	1.20881	0.0736011
YAL007C	YAL007C	34.1023	28.0421	1.21611	0.0681744					YJR051W	YJR051W	37.1895	30.5365	1.21787	0.0924504					YKL034W	YKL034W	34.8772	28.8526	1.20881	0.0734647
YIL099W	YIL099W	33.1214	27.2356	1.21611	0.0681284					YGL160W	YGL160W	36.5703	30.0288	1.21784	0.0918878					YEL004W	YEL004W	36.9493	30.5668	1.20881	0.0734228
YLR434C	YLR434C	33.4287	27.4883	1.21611	0.0680993					YAL037W	YAL037W	36.3225	29.8254	1.21784	0.0918241					YKR058W	YKR058W	35.8121	29.6261	1.2088	0.0733999
YPR011C	YPR011C	34.6314	28.4773	1.2161	0.0680423					YDL127W	YDL127W	36.1306	29.6685	1.21781	0.0912952					YMR175W	YMR175W	37.1842	30.7612	1.2088	0.0733992
YKR056W	YKR056W	33.0202	27.1526	1.2161	0.0679062					YDR482C	YDR482C	37.3498	30.6703	1.21778	0.0908451					YNL076W	YNL076W	37.8005	31.2711	1.2088	0.0732973
YKL162C-A	YKL162C-A	35.491	29.1844	1.21609	0.0678386					YGR130C	YGR130C	36.0338	29.5897	1.21778	0.0908221					YGR039W	YGR039W	35.9571	29.7463	1.20879	0.0731461
YJR066W	YJR066W	34.0325	27.9857	1.21607	0.067327					YLR331C	YLR331C	36.4272	29.913	1.21777	0.0906257					YER176W	YER176W	36.6965	30.3585	1.20877	0.0727929
YMR153W	YMR153W	34.7725	28.5958	1.216	0.0659638					YDL085W	YDL085W	36.0216	29.58	1.21777	0.0905489					YCL075W	YCL075W	36.0666	29.8375	1.20877	0.0727256
YMR294W	YMR294W	31.3974	25.8218	1.21592	0.0644798					YCL046W	YCL046W	36.5579	30.0218	1.21771	0.0894067					YJL065C	YJL065C	36.6054	30.2833	1.20877	0.0726597
YCR079W	YCR079W	33.2566	27.3513	1.21591	0.0641184					YIR021W	YIR021W	34.1773	28.067	1.2177	0.089319					YDL144C	YDL144C	35.1645	29.0917	1.20875	0.0723133
YJL132W	YJL132W	32.457	26.6938	1.2159	0.0640473					YJL153C	YJL153C	35.1947	28.9026	1.2177	0.0893022					YHR060W	YHR060W	35.2697	29.1787	1.20875	0.0722915
YBR288C	YBR288C	34.2417	28.1617	1.2159	0.0639244					YPR173C	YPR173C	34.9153	28.6732	1.2177	0.089258					YDL171C	YDL171C	35.9173	29.715	1.20873	0.0719216
YDL170W	YDL170W	34.2484	28.1675	1.21588	0.0636881					YNR009W	YNR009W	35.1651	28.8783	1.2177	0.0892003					YNL254C	YNL254C	36.0591	29.8327	1.20871	0.0715684
YDL024C	YDL024C	33.8695	27.856	1.21588	0.063606					YER154W	YER154W	35.0008	28.7435	1.21769	0.0891067					YLR327C	YLR327C	35.6645	29.5067	1.20869	0.0712264
YIL017C	YIL017C	35.0105	28.7947	1.21587	0.0633591					YLR102C	YLR102C	37.9199	31.1409	1.21769	0.0890317					YNL155W	YNL155W	35.8953	29.6979	1.20868	0.071008
YOR350C	YOR350C	32.0719	26.3781	1.21586	0.063135					YAL031C	YAL031C	35.9614	29.533	1.21767	0.0887047					YBR159W	YBR159W	35.99	29.7763	1.20868	0.0709793
YHR076W	YHR076W	33.0196	27.1575	1.21586	0.0631272					YGR001C	YGR001C	34.5317	28.3601	1.21762	0.0876465					YOR076C	YOR076C	37.8347	31.3025	1.20868	0.0709315
YNL144C	YNL144C	33.7903	27.7918	1.21584	0.0627363					YJL092W	YJL092W	36.5712	30.0354	1.21761	0.0874799					YKL190W	YKL190W	37.3071	30.8663	1.20867	0.0707346
YNL100W	YNL100W	32.3328	26.5938	1.2158	0.062087					YJL056C	YJL056C	36.1186	29.6641	1.21759	0.0870843					YNL012W	YNL012W	35.2902	29.1983	1.20864	0.0702497
YOR317W	YOR317W	33.3544	27.4341	1.2158	0.0620769					YKL107W	YKL107W	34.57	28.3925	1.21758	0.0869022					YGR209C	YGR209C	35.7576	29.5855	1.20862	0.0697768
YPL141C	YPL141C	33.0784	27.2074	1.21579	0.0617723					YER118C	YER118C	36.7624	30.1932	1.21757	0.0868255					YHL040C	YHL040C	36.6264	30.3059	1.20856	0.0685982
YOR242C	YOR242C	33.5485	27.5942	1.21578	0.0615887					YPL053C	YPL053C	36.7034	30.1454	1.21755	0.0863315					YOR053W	YOR053W	37.7261	31.2159	1.20856	0.0685829
YJL124C	YJL124C	33.3874	27.4622	1.21576	0.0612422					YNL128W	YNL128W	36.6803	30.1276	1.2175	0.0854091					YPL123C	YPL123C	35.101	29.0441	1.20854	0.0683206
YDR266C	YDR266C	33.8454	27.8399	1.21572	0.0603689					YNL063W	YNL063W	35.5964	29.2376	1.21749	0.0852014					YKR003W	YKR003W	34.9192	28.8937	1.20854	0.0683108
YHR114W	YHR114W	34.7348	28.5716	1.21571	0.060237					YNR013C	YNR013C	35.6386	29.2723	1.21748	0.0851366					YMR102C	YMR102C	35.2669	29.1814	1.20854	0.0682502
YNL190W	YNL190W	32.6781	26.88	1.2157	0.0601441					YOR208W	YOR208W	36.3499	29.8567	1.21748	0.0850783					YIL163C	YIL163C	35.1967	29.1234	1.20853	0.0681653
YOR377W	YOR377W	34.5475	28.4179	1.2157	0.0599802					YAL012W	YAL012W	35.8967	29.4859	1.21742	0.0839369					YJL027C	YJL027C	35.7747	29.6019	1.20853	0.0680584
YER145C	YER145C	32.8493	27.0212	1.21568	0.059739					YER077C	YER077C	35.3532	29.0403	1.21739	0.0832859					YGL029W	YGL029W	34.9474	28.9182	1.20849	0.0673787
YNL028W	YNL028W	33.301	27.3929	1.21568	0.0596866					YAL004W	YAL004W	36.5103	29.9909	1.21738	0.0831938					YOL113W	YOL113W	35.7713	29.5999	1.20849	0.0673575
YAL037W	YAL037W	33.1014	27.2287	1.21568	0.0596772					YKL096W	YKL096W	35.1662	28.8875	1.21735	0.0826567					YGL202W	YGL202W	35.8928	29.7007	1.20848	0.0671675
YGL257C	YGL257C	33.3492	27.4326	1.21568	0.0596309					YBL017C	YBL017C	35.4909	29.1547	1.21733	0.0822879					YDR383C	YDR383C	36.0463	29.8278	1.20848	0.0670663
YNL125C	YNL125C	32.7996	26.9809	1.21566	0.0593009					YNR074C	YNR074C	35.8011	29.4097	1.21732	0.082045					YPL052W	YPL052W	36.5845	30.2734	1.20847	0.0669633
YHR135C	YHR135C	33.6875	27.7123	1.21562	0.0584045					YJL190C	YJL190C	36.183	29.7237	1.21731	0.0819285					YDR315C	YDR315C	38.2297	31.6349	1.20847	0.0668683
YIL136W	YIL136W	33.909	27.8948	1.21561	0.058189					YNL145W	YNL145W	35.8217	29.4271	1.2173	0.0817043					YGL117W	YGL117W	35.5266	29.398	1.20847	0.066868
YPL183C	YPL183C	35.4858	29.1923	1.21559	0.0578165					YMR293C	YMR293C	33.9079	27.8553	1.21729	0.081419					YHR138C	YHR138C	36.7886	30.443	1.20844	0.0663891
YOR090C	YOR090C	33.8151	27.8185	1.21556	0.0572941					YLR146C	YLR146C	35.4367	29.1119	1.21726	0.0809123					YKL177W	YKL177W	35.6007	29.4602	1.20844	0.0662553
YPL229W	YPL229W	34.5329	28.4093	1.21555	0.0571141					YKR078W	YKR078W	36.9466	30.3523	1.21726	0.0808521					YGR187C	YGR187C	36.5366	30.2348	1.20843	0.0661428
YMR158W	YMR158W	33.4609	27.5274	1.21555	0.0570738					YNL266W	YNL266W	35.4303	29.1073	1.21723	0.0804019					YPL200W	YPL200W	36.1763	29.9366	1.20843	0.0661163
YKR102W	YKR102W	34.7473	28.5857	1.21555	0.0570562					YGL009C	YGL009C	35.4488	29.1225	1.21723	0.0803338					YDR423C	YDR423C	35.2755	29.1923	1.20838	0.0651982
YBL017C	YBL017C	33.646	27.68	1.21554	0.0568238					YBR163W	YBR163W	34.6959	28.5043	1.21722	0.0801086					YDR457W	YDR457W	33.9246	28.0756	1.20833	0.064182
YJL084C	YJL084C	33.1251	27.2515	1.21553	0.0567096					YMR326C	YMR326C	35.2536	28.9626	1.21721	0.0800169					YNR051C	YNR051C	40.1878	33.2592	1.20832	0.0640356
YLR453C	YLR453C	35.4061	29.1282	1.21553	0.0566799					YFL047W	YFL047W	36.0614	29.6264	1.2172	0.0798336					YMR194W	YMR194W	33.9223	28.0742	1.20831	0.0637813
YIL069C	YIL069C	36.468	30.0022	1.21551	0.0563123					YDR050C	YDR050C	36.5092	29.9945	1.2172	0.079693					YHL024W	YHL024W	35.7911	29.621	1.2083	0.0635717
YOR156C	YOR156C	36.381	29.931	1.2155	0.0560062					YPL030W	YPL030W	36.6946	30.1471	1.21719	0.079527					YOR378W	YOR378W	36.0666	29.8491	1.20829	0.0634939
YDR216W	YDR216W	32.5588	26.7869	1.21547	0.0555251					YMR081C	YMR081C	35.4109	29.0929	1.21716	0.0791031					YLR032W	YLR032W	37.615	31.1308	1.20829	0.0634293
YKL124W	YKL124W	33.4856	27.5496	1.21547	0.0554123					YOR339C	YOR339C	36.646	30.1078	1.21716	0.0789884					YBR014C	YBR014C	35.8663	29.6838	1.20828	0.0632023
YKL062W	YKL062W	33.7917	27.8018	1.21545	0.0551683					YBR271W	YBR271W	35.7042	29.3347	1.21713	0.0784359					YOR009W	YOR009W	36.3254	30.0638	1.20828	0.06318
YOR205C	YOR205C	32.7315	26.9296	1.21545	0.0550901					YOR219C	YOR219C	35.5209	29.1843	1.21713	0.0784013					YCR106W	YCR106W	35.7669	29.6016	1.20827	0.0631056
YNL139C	YNL139C	38.1288	31.3702	1.21545	0.0550676					YDR326C	YDR326C	35.9824	29.5653	1.21705	0.0768681					YLR025W	YLR025W	36.5942	30.2865	1.20827	0.0629384
YNL318C	YNL318C	31.8183	26.1788	1.21542	0.0545437					YOR082C	YOR082C	33.0318	27.1412	1.21703	0.0766364					YGL133W	YGL133W	36.3913	30.119	1.20825	0.0626486
YDR244W	YDR244W	34.414	28.315	1.2154	0.0541189					YOR092W	YOR092W	36.2553	29.7901	1.21703	0.0764808					YAL030W	YAL030W	35.5705	29.4398	1.20824	0.0625109
YPL222W	YPL222W	35.5598	29.2579	1.21539	0.0539266					YOL018C	YOL018C	33.3891	27.4356	1.217	0.0760087					YHL039W	YHL039W	35.4877	29.3721	1.20821	0.0618616
YNL105W	YNL105W	32.9153	27.0822	1.21539	0.0538208					YGR032W	YGR032W	34.2215	28.121	1.21694	0.0748023					YGL131C	YGL131C	35.41	29.3079	1.20821	0.0618052
YER078C	YER078C	33.5663	27.6182	1.21537	0.0534792					YLR405W	YLR405W	34.3568	28.2335	1.21688	0.0737295					YLR135W	YLR135W	36.0955	29.8754	1.2082	0.0616984
YDL149W	YDL149W	33.219	27.333	1.21534	0.0529978					YKL190W	YKL190W	37.2736	30.6313	1.21685	0.0730961					YPL267W	YPL267W	36.2855	30.0331	1.20819	0.0613664
YOR028C	YOR028C	33.2722	27.3771	1.21533	0.0527499					YKR033C	YKR033C	36.1368	29.6975	1.21683	0.0728046					YNL284C	YNL284C	35.3316	29.2435	1.20818	0.0613626
YHR133C	YHR133C	32.5678	26.7981	1.2153	0.0521861					YCR048W	YCR048W	35.3012	29.0116	1.21679	0.072095					YGR241C	YGR241C	38.0021	31.4542	1.20817	0.0610685
YER001W	YER001W	34.3949	28.3015	1.2153	0.0521714					YJL214W	YJL214W	34.8396	28.6323	1.21679	0.0720645					YJL130C	YJL130C	35.843	29.6672	1.20817	0.0610501
YDR263C	YDR263C	34.0065	27.9819	1.2153	0.0521704					YHR130C	YHR130C	36.4621	29.9663	1.21677	0.0716617					YKR065C	YKR065C	34.842	28.8387	1.20817	0.0610286
YOR328W	YOR328W	32.6896	26.8987	1.21529	0.0518542					YOR274W	YOR274W	37.7141	30.9955	1.21676	0.0714709					YER045C	YER045C	36.2038	29.966	1.20816	0.0609439
YGL043W	YGL043W	32.7088	26.9146	1.21528	0.0517426					YJL130C	YJL130C	35.9189	29.5209	1.21673	0.0708333					YDL188C	YDL188C	35.9139	29.7264	1.20815	0.0606638
YGR270W	YGR270W	30.7505	25.3034	1.21527	0.0515358					YIR030C	YIR030C	36.8545	30.2899	1.21673	0.0708098					YGR252W	YGR252W	34.4693	28.5308	1.20814	0.0605627
YNL286W	YNL286W	33.364	27.455	1.21523	0.050649					YER140W	YER140W	37.1345	30.5202	1.21672	0.070734					YDR371W	YDR371W	37.1925	30.7849	1.20814	0.0605111
YNL055C	YNL055C	33.648	27.6892	1.2152	0.0501454					YLR112W	YLR112W	35.2308	28.9557	1.21671	0.070601					YBL086C	YBL086C	37.0225	30.6443	1.20814	0.060448
YML109W	YML109W	35.3417	29.0832	1.21519	0.0499551					YIL085C	YIL085C	35.2874	29.0028	1.21669	0.0701079					YPL188W	YPL188W	36.4467	30.1677	1.20814	0.0604457
YDR055W	YDR055W	33.3496	27.4444	1.21517	0.0496008					YGL198W	YGL198W	36.115	29.6835	1.21667	0.0697817					YFR036W	YFR036W	34.8776	28.8692	1.20813	0.0602176
YBR067C	YBR067C	33.6693	27.7075	1.21517	0.0495901					YPL081W	YPL081W	36.6712	30.1413	1.21665	0.0693037					YKR016W	YKR016W	34.5128	28.5675	1.20811	0.0599718
YJL153C	YJL153C	34.3776	28.2904	1.21516	0.0494498					YBR150C	YBR150C	37.0996	30.4939	1.21662	0.0688391					YIL008W	YIL008W	37.8852	31.3591	1.20811	0.0598334
YPL123C	YPL123C	31.8254	26.1903	1.21516	0.0493207					YLL006W	YLL006W	36.8534	30.2918	1.21661	0.0686573					YKL070W	YKL070W	36.8829	30.5301	1.20808	0.0593736
YGL050W	YGL050W	33.5779	27.6332	1.21513	0.0487536					YMR234W	YMR234W	36.3808	29.904	1.21659	0.0681811					YOR091W	YOR091W	36.1882	29.9551	1.20808	0.0593501
YGL251C	YGL251C	32.1707	26.4755	1.21511	0.048387					YPR058W	YPR058W	36.613	30.0958	1.21655	0.0674915					YDR275W	YDR275W	35.4407	29.3364	1.20808	0.0592771
YDR018C	YDR018C	33.2366	27.3527	1.21511	0.0483715					YDR124W	YDR124W	36.9914	30.4078	1.21651	0.066766					YNR024W	YNR024W	36.2631	30.0172	1.20808	0.059274
YER062C	YER062C	32.2472	26.5385	1.21511	0.0483508					YPL048W	YPL048W	36.0501	29.634	1.21651	0.0667272					YIL132C	YIL132C	34.7665	28.7784	1.20808	0.0592733
YAL045C	YAL045C	33.3704	27.463	1.2151	0.0482508					YER155C	YER155C	46.5621	38.2753	1.2165	0.066634					YLR057W	YLR057W	36.6769	30.36	1.20807	0.0590606
YHL010C	YHL010C	33.0646	27.2114	1.2151	0.0481999					YPR172W	YPR172W	34.9214	28.7073	1.21646	0.0658573					YER187W	YER187W	36.3749	30.1105	1.20805	0.0586703
YKL214C	YKL214C	33.1608	27.2908	1.21509	0.0480442					YKL140W	YKL140W	37.3018	30.6647	1.21644	0.0654709					YDR291W	YDR291W	37.3729	30.9368	1.20804	0.058557
YOR265W	YOR265W	34.013	27.9926	1.21507	0.0476093					YEL017C-A	YEL017C-A	35.8403	29.4634	1.21643	0.0652973					YMR129W	YMR129W	36.1368	29.9144	1.20801	0.0579149
YNL285W	YNL285W	32.4259	26.6865	1.21507	0.0475058					YGL154C	YGL154C	37.0806	30.4835	1.21641	0.0649327					YGL076C	YGL076C	35.2584	29.1874	1.208	0.0577828
YKL102C	YKL102C	34.4173	28.3255	1.21507	0.047476					YOR342C	YOR342C	35.8409	29.4647	1.2164	0.0646993					YDR077W	YDR077W	35.2756	29.2017	1.208	0.0577598
YJL007C	YJL007C	32.4842	26.735	1.21504	0.0470668					YDR032C	YDR032C	36.0999	29.6776	1.2164	0.0646901					YOR296W	YOR296W	36.1231	29.9044	1.20795	0.0568354
YKL130C	YKL130C	33.4937	27.5658	1.21504	0.0470597					YOR031W	YOR031W	36.0322	29.6226	1.21638	0.0641938					YPL245W	YPL245W	37.3845	30.9494	1.20792	0.0562634
YIL086C	YIL086C	32.7388	26.9447	1.21504	0.0469014					YOR179C	YOR179C	36.4146	29.9372	1.21636	0.0639724					YBR197C	YBR197C	35.2514	29.1837	1.20791	0.0560718
YBR242W	YBR242W	34.4565	28.359	1.21501	0.0463665					YOR269W	YOR269W	36.4697	29.9825	1.21636	0.0639631					YGL013C	YGL013C	35.0727	29.0369	1.20787	0.0551563
YOL015W	YOL015W	33.7684	27.7931	1.21499	0.0460568					YGR136W	YGR136W	35.6807	29.334	1.21636	0.0638918					YOR050C	YOR050C	35.9435	29.7583	1.20785	0.0548066
YGL216W	YGL216W	32.6123	26.8417	1.21499	0.0459371					YFR036W	YFR036W	34.9871	28.7639	1.21635	0.0637975					YNL195C	YNL195C	35.7956	29.6361	1.20784	0.054609
YDR126W	YDR126W	33.2098	27.3347	1.21493	0.0448035					YHL010C	YHL010C	35.4078	29.1101	1.21634	0.0635317					YPR126C	YPR126C	37.9379	31.41	1.20783	0.0543968
YJL135W	YJL135W	32.4914	26.7435	1.21493	0.0447371					YGR149W	YGR149W	36.3137	29.8549	1.21634	0.0634836					YPL206C	YPL206C	36.1881	29.9614	1.20783	0.0543897
YLR047C	YLR047C	36.116	29.727	1.21492	0.044598					YHR202W	YHR202W	36.8935	30.3321	1.21632	0.0631113					YMR255W	YMR255W	36.8008	30.4687	1.20782	0.054321
YBR285W	YBR285W	33.7795	27.8042	1.21491	0.0443245					YNL200C	YNL200C	35.1714	28.9165	1.21631	0.0629332					YOR107W	YOR107W	36.9121	30.5609	1.20782	0.0542703
YDL230W	YDL230W	32.4617	26.7202	1.21487	0.0436569					YOR005C	YOR005C	36.9356	30.3672	1.2163	0.0627362					YOL162W	YOL162W	35.339	29.2585	1.20782	0.054256
YIL138C	YIL138C	33.2892	27.4015	1.21487	0.0435342					YMR237W	YMR237W	38.9203	31.999	1.2163	0.0627225					YGR205W	YGR205W	35.2173	29.1583	1.2078	0.0538025
YLR179C	YLR179C	33.0425	27.1989	1.21485	0.0431674					YPR157W	YPR157W	35.0447	28.8132	1.21627	0.0622167					YIL058W	YIL058W	35.1611	29.112	1.20778	0.0535808
YNR064C	YNR064C	33.9149	27.9171	1.21485	0.0431233					YJL131C	YJL131C	35.7244	29.3722	1.21626	0.0620648					YIR035C	YIR035C	37.1206	30.7348	1.20777	0.0533095
YOR226C	YOR226C	34.0997	28.0693	1.21484	0.04297					YOR010C	YOR010C	36.5161	30.0232	1.21626	0.0620048					YPL184C	YPL184C	35.5074	29.3992	1.20777	0.0532501
YLR027C	YLR027C	35.4862	29.2108	1.21483	0.0428495					YCL008C	YCL008C	37.8485	31.1191	1.21625	0.0617413					YGR247W	YGR247W	35.5592	29.4425	1.20775	0.0529169
YDR006C	YDR006C	32.3824	26.6559	1.21483	0.0427549					YJL207C	YJL207C	35.2507	28.9836	1.21623	0.0614723					YJR102C	YJR102C	36.5094	30.2294	1.20774	0.0528022
YLR449W	YLR449W	34.0912	28.0627	1.21482	0.0426537					YIL136W	YIL136W	36.1482	29.7217	1.21622	0.0613174					YDR126W	YDR126W	35.6936	29.554	1.20774	0.0528016
YNL266W	YNL266W	33.8062	27.8282	1.21482	0.0425725					YLR006C	YLR006C	39.3148	32.3253	1.21622	0.0613111					YLR219W	YLR219W	35.2482	29.1852	1.20774	0.0527693
YJL193W	YJL193W	32.8703	27.058	1.21481	0.0424057					YGL076C	YGL076C	35.3658	29.0785	1.21622	0.0612094					YKL142W	YKL142W	35.4151	29.3244	1.2077	0.051962
YJL048C	YJL048C	35.7576	29.4352	1.21479	0.0420392					YNL108C	YNL108C	35.655	29.3164	1.21621	0.0611477					YMR153C-A	YMR153C-A	36.2258	29.9958	1.2077	0.0518423
YIL085C	YIL085C	32.7607	26.9683	1.21479	0.0419484					YDL216C	YDL216C	35.9746	29.5796	1.2162	0.0608058					YBL048W	YBL048W	35.569	29.4522	1.20769	0.0516856
YLR331C	YLR331C	33.7427	27.7771	1.21477	0.0415566					YHR112C	YHR112C	35.5684	29.2457	1.21619	0.0606699					YMR162C	YMR162C	36.096	29.8888	1.20768	0.0514862
YGR093W	YGR093W	33.4509	27.537	1.21476	0.0414809					YBL101C	YBL101C	37.1318	30.5313	1.21619	0.0606686					YGL160W	YGL160W	35.5557	29.4414	1.20768	0.0514637
YMR018W	YMR018W	34.1034	28.0741	1.21476	0.0414643					YDL175C	YDL175C	36.612	30.1043	1.21617	0.060344					YDL194W	YDL194W	35.8109	29.6533	1.20765	0.0510452
YDR471W	YDR471W	32.5328	26.7812	1.21476	0.0414467					YDR193W	YDR193W	34.1399	28.0717	1.21617	0.0603124					YMR194C-A	YMR194C-A	35.987	29.7993	1.20765	0.0509008
YNR057C	YNR057C	33.1142	27.2607	1.21473	0.0407349					YGR086C	YGR086C	36.1617	29.7349	1.21614	0.0596568					YKR095W	YKR095W	36.6354	30.3373	1.2076	0.0500427
YOR003W	YOR003W	34.8627	28.7002	1.21472	0.0406101					YMR026C	YMR026C	36.0123	29.6121	1.21614	0.0596467					YOL125W	YOL125W	37.1702	30.7803	1.2076	0.0499143
YLL018C-A	YLL018C-A	33.0843	27.2368	1.21469	0.0400645					YGL229C	YGL229C	36.7683	30.2342	1.21612	0.0592946					YNL117W	YNL117W	34.7908	28.8111	1.20755	0.0490049
YDR090C	YDR090C	33.5984	27.6601	1.21469	0.0400433					YOR368W	YOR368W	36.2174	29.7812	1.21612	0.0592701					YOR034C	YOR034C	35.2583	29.1985	1.20754	0.0488631
YER054C	YER054C	34.2272	28.1784	1.21466	0.0394898					YGR026W	YGR026W	36.7258	30.2009	1.21605	0.0580483					YJL217W	YJL217W	35.646	29.5198	1.20753	0.0486089
YGL226W	YGL226W	33.9905	27.9835	1.21466	0.0394582					YBR044C	YBR044C	37.6964	30.9992	1.21605	0.0579603					YML124C	YML124C	34.9864	28.9737	1.20752	0.0485378
YLR126C	YLR126C	33.6011	27.6633	1.21465	0.0392265					YBR244W	YBR244W	37.1088	30.5163	1.21603	0.0576906					YNL027W	YNL027W	35.8321	29.6745	1.20751	0.0481829
YFR039C	YFR039C	32.9975	27.1664	1.21464	0.0391256					YNL335W	YNL335W	36.1512	29.7298	1.21599	0.0569584					YDL034W	YDL034W	35.3811	29.3013	1.20749	0.0479143
YGL144C	YGL144C	33.1084	27.2578	1.21464	0.0390818					YGL228W	YGL228W	34.9031	28.7043	1.21595	0.0561702					YDR127W	YDR127W	36.6959	30.3904	1.20748	0.0477069
YLR395C	YLR395C	33.2497	27.3742	1.21464	0.0389903					YCR011C	YCR011C	36.7882	30.2547	1.21595	0.0561494					YGR238C	YGR238C	36.6144	30.3233	1.20747	0.0473829
YEL030W	YEL030W	34.3994	28.3208	1.21463	0.0389425					YGL219C	YGL219C	35.2311	28.9743	1.21594	0.0559634					YGR204W	YGR204W	34.9773	28.9677	1.20746	0.0472296
YHR029C	YHR029C	33.9237	27.9292	1.21463	0.0389049					YKR003W	YKR003W	35.1546	28.9118	1.21593	0.0556962					YNL286W	YNL286W	35.9022	29.7337	1.20746	0.0472147
YPL064C	YPL064C	33.0803	27.2351	1.21462	0.0385983					YGL006W	YGL006W	34.7941	28.6154	1.21592	0.055598					YGR194C	YGR194C	34.1121	28.2514	1.20745	0.0470259
YGR008C	YGR008C	34.9632	28.7855	1.21461	0.0384928					YCR106W	YCR106W	35.9395	29.5576	1.21591	0.0554133					YPR013C	YPR013C	35.5227	29.4201	1.20743	0.046642
YOR195W	YOR195W	34.9927	28.8102	1.21459	0.038122					YBL048W	YBL048W	35.5362	29.2263	1.2159	0.0551976					YBR229C	YBR229C	44.9004	37.1869	1.20743	0.046611
YOR137C	YOR137C	34.605	28.4911	1.21459	0.0380496					YPL212C	YPL212C	36.79	30.2577	1.21589	0.0550001					YDL048C	YDL048C	35.8092	29.6578	1.20741	0.0463651
YLR364W	YLR364W	32.6469	26.881	1.2145	0.0362263					YGL234W	YGL234W	36.6859	30.1722	1.21589	0.0549215					YLR369W	YLR369W	37.0694	30.7017	1.20741	0.0462475
YJL100W	YJL100W	33.0166	27.1855	1.21449	0.0361224					YOR248W	YOR248W	36.5074	30.0256	1.21588	0.0547622					YLR431C	YLR431C	36.0724	29.876	1.2074	0.0461918
YNR034W	YNR034W	34.4703	28.3833	1.21446	0.035462					YMR205C	YMR205C	38.6579	31.7942	1.21588	0.0547551					YEL049W	YEL049W	36.694	30.3914	1.20738	0.0457415
YER066C-A	YER066C-A	32.04	26.3822	1.21446	0.0354193					YIL086C	YIL086C	35.3658	29.0869	1.21587	0.0545405					YHR139C-A	YHR139C-A	37.012	30.655	1.20737	0.0455914
YIR029W	YIR029W	34.4282	28.3487	1.21445	0.0353193					YER042W	YER042W	37.5626	30.8939	1.21586	0.0543489					YER143W	YER143W	36.5397	30.2638	1.20737	0.0455875
YJL147C	YJL147C	32.7919	27.0016	1.21444	0.0351237					YMR086C-A	YMR086C-A	33.873	27.8597	1.21584	0.0540829					YCR048W	YCR048W	35.0617	29.04	1.20736	0.0453408
YDL218W	YDL218W	32.6179	26.8584	1.21444	0.0350443					YFR025C	YFR025C	37.8142	31.1017	1.21582	0.0537566					YLR268W	YLR268W	39.8539	33.0092	1.20736	0.0452615
YIL131C	YIL131C	31.7561	26.1489	1.21443	0.0349416					YFR047C	YFR047C	35.7633	29.4153	1.21581	0.0534158					YNL239W	YNL239W	36.2125	29.9933	1.20735	0.0452076
YKL220C	YKL220C	33.4275	27.5254	1.21443	0.0348109					YNR034W	YNR034W	36.2014	29.7761	1.21579	0.0530469					YBR041W	YBR041W	35.3257	29.2592	1.20734	0.0449089
YDR338C	YDR338C	34.4461	28.3642	1.21442	0.0347175					YNL324W	YNL324W	36.9826	30.4188	1.21578	0.0529605					YDL113C	YDL113C	33.9494	28.1194	1.20733	0.0447682
YGL003C	YGL003C	34.7251	28.594	1.21442	0.0346805					YMR315W	YMR315W	36.3744	29.9185	1.21578	0.0529438					YML117W	YML117W	38.5591	31.9376	1.20733	0.0446647
YDR181C	YDR181C	33.672	27.7273	1.2144	0.0342895					YMR175W	YMR175W	36.9469	30.3899	1.21576	0.0525875					YDL069C	YDL069C	34.3256	28.4314	1.20731	0.04443
YER048C	YER048C	35.3737	29.1286	1.2144	0.0342141					YJL176C	YJL176C	37.7731	31.0699	1.21575	0.0522738					YML117W-A	YML117W-A	36.6463	30.3541	1.20729	0.0440293
YHL046C	YHL046C	34.2197	28.1786	1.21439	0.0340326					YNL254C	YNL254C	34.9166	28.7204	1.21574	0.0522071					YBR051W	YBR051W	35.0738	29.052	1.20728	0.0437593
YBR013C	YBR013C	34.0151	28.0101	1.21439	0.0340136					YPR071W	YPR071W	36.0778	29.6763	1.21571	0.051558					YEL020C	YEL020C	37.2672	30.8691	1.20726	0.0434801
YDR389W	YDR389W	34.6418	28.5266	1.21437	0.0336369					YGL158W	YGL158W	35.875	29.5097	1.2157	0.0514455					YGR291C	YGR291C	35.0146	29.0033	1.20726	0.0434677
YOR138C	YOR138C	34.1887	28.1537	1.21436	0.0335093					YKR049C	YKR049C	35.4049	29.1233	1.21569	0.051198					YNL332W	YNL332W	35.0609	29.0418	1.20726	0.043376
YPL041C	YPL041C	35.0569	28.8689	1.21435	0.0332908					YIL094C	YIL094C	36.3089	29.8676	1.21566	0.050719					YIR020W-B	YIR020W-B	35.8755	29.717	1.20724	0.0429119
YGL006W	YGL006W	33.7529	27.7954	1.21433	0.0329989					YLL017W	YLL017W	36.7733	30.2496	1.21566	0.0507055					YCL036W	YCL036W	36.1151	29.9159	1.20722	0.0426086
YDL155W	YDL155W	34.5446	28.4476	1.21432	0.0327779					YPL041C	YPL041C	36.4291	29.9665	1.21566	0.0506414					YIL060W	YIL060W	36.3753	30.133	1.20716	0.0414125
YPL102C	YPL102C	36.5482	30.0981	1.2143	0.0323726					YDR126W	YDR126W	36.204	29.7814	1.21566	0.0506266					YJR119C	YJR119C	36.7017	30.4038	1.20714	0.0411148
YER017C	YER017C	33.5007	27.589	1.21428	0.031853					YNL286W	YNL286W	35.3444	29.0748	1.21564	0.0502232					YIL094C	YIL094C	36.4483	30.194	1.20714	0.0410208
YDR539W	YDR539W	33.0078	27.1831	1.21428	0.031836					YPR150W	YPR150W	35.5124	29.2137	1.21561	0.0496959					YLL042C	YLL042C	36.2544	30.0337	1.20712	0.0407308
YKR105C	YKR105C	33.0833	27.2453	1.21427	0.0318115					YNL217W	YNL217W	35.6829	29.3547	1.21558	0.0491017					YCR032W	YCR032W	36.1029	29.9086	1.2071	0.0403696
YNL204C	YNL204C	32.8185	27.0272	1.21427	0.0318039					YIL056W	YIL056W	35.0902	28.8673	1.21557	0.0489586					YNL328C	YNL328C	35.9682	29.7973	1.2071	0.0402166
YOL162W	YOL162W	33.3503	27.4655	1.21426	0.0315947					YIL029C	YIL029C	37.1622	30.5719	1.21557	0.0488747					YDR022C	YDR022C	35.36	29.2934	1.2071	0.0402123
YJL108C	YJL108C	34.0024	28.0036	1.21421	0.0305874					YLR361C	YLR361C	36.7202	30.2085	1.21556	0.0487738					YDR035W	YDR035W	35.8119	29.6679	1.2071	0.0401894
YDR095C	YDR095C	33.0849	27.2488	1.21418	0.0299233					YGR285C	YGR285C	35.7248	29.3897	1.21556	0.0486669					YMR201C	YMR201C	35.182	29.1463	1.20708	0.0399556
YBR159W	YBR159W	33.3784	27.4908	1.21417	0.0296925					YOL104C	YOL104C	36.4864	30.0164	1.21555	0.0485911					YJR084W	YJR084W	36.0661	29.8789	1.20708	0.0398343
YPR046W	YPR046W	34.2251	28.1887	1.21414	0.029157					YPL202C	YPL202C	35.9074	29.5411	1.21551	0.047793					YPR195C	YPR195C	35.0222	29.0141	1.20707	0.0397876
YML095C	YML095C	34.7367	28.6103	1.21413	0.0289933					YPL220W	YPL220W	37.6543	30.9787	1.21549	0.0474641					YEL030W	YEL030W	36.5886	30.3122	1.20706	0.0394655
YIL015C-A	YIL015C-A	33.0086	27.1871	1.21413	0.0289001					YHR025W	YHR025W	36.4887	30.0201	1.21548	0.0471602					YER158C	YER158C	36.2939	30.0685	1.20704	0.0391558
YKL065C	YKL065C	35.24	29.0251	1.21412	0.0288098					YCR091W	YCR091W	35.4472	29.1636	1.21546	0.0468844					YKL040C	YKL040C	36.8596	30.5374	1.20703	0.0389201
YDL206W	YDL206W	34.9225	28.764	1.2141	0.0284158					YIL010W	YIL010W	35.761	29.4228	1.21542	0.0460958					YMR254C	YMR254C	35.7781	29.6415	1.20703	0.0388574
YLR237W	YLR237W	33.1933	27.3401	1.21409	0.0281574					YDL149W	YDL149W	35.8882	29.5279	1.2154	0.045698					YML062C	YML062C	36.5892	30.3137	1.20702	0.0386727
YML117W	YML117W	35.5988	29.3216	1.21408	0.0279937					YNL196C	YNL196C	35.4457	29.1643	1.21538	0.0453783					YOR011W	YOR011W	36.4499	30.1985	1.20701	0.03852
YCR101C	YCR101C	32.5194	26.7854	1.21407	0.0278109					YLR420W	YLR420W	36.0692	29.6778	1.21536	0.0449546					YDL110C	YDL110C	35.5406	29.4455	1.207	0.0382881
YOR199W	YOR199W	33.5404	27.6264	1.21407	0.0277564					YBL001C	YBL001C	36.4579	29.9977	1.21536	0.0449076					YNR007C	YNR007C	36.3378	30.1071	1.20695	0.037376
YJL213W	YJL213W	33.2762	27.4089	1.21406	0.0276477					YDL034W	YDL034W	35.2322	28.9894	1.21535	0.0447281					YJL082W	YJL082W	35.5054	29.4181	1.20692	0.036856
YNL035C	YNL035C	32.6246	26.8725	1.21405	0.0274087					YGR241C	YGR241C	37.9326	31.2124	1.21531	0.0439832					YGR199W	YGR199W	35.5615	29.4648	1.20692	0.0367322
YFR033C	YFR033C	32.9301	27.1242	1.21405	0.0273089					YGR123C	YGR123C	35.2741	29.0248	1.21531	0.0439711					YDR202C	YDR202C	34.8743	28.8961	1.20688	0.0360974
YPR021C	YPR021C	35.5751	29.3031	1.21404	0.027084					YNL295W	YNL295W	35.54	29.2437	1.21531	0.0439565					YER078C	YER078C	36.3452	30.1156	1.20685	0.0355057
YDR536W	YDR536W	33.5384	27.6255	1.21404	0.0270598					YGL037C	YGL037C	35.449	29.1693	1.21529	0.04356					YIR037W	YIR037W	37.0533	30.7025	1.20685	0.0354092
YDR237W	YDR237W	32.364	26.6583	1.21403	0.0269791					YHR038W	YHR038W	35.0839	28.8692	1.21527	0.0433028					YER091C-A	YER091C-A	36.2714	30.0547	1.20685	0.0353288
YER033C	YER033C	34.1964	28.1678	1.21403	0.026884					YPL195W	YPL195W	34.493	28.3833	1.21526	0.0430101					YPL272C	YPL272C	36.3658	30.1333	1.20683	0.0350629
YDL080C	YDL080C	34.9275	28.7703	1.21401	0.0266433					YDL168W	YDL168W	36.0429	29.6593	1.21523	0.0424941					YLR126C	YLR126C	35.7478	29.6216	1.20681	0.0347358
YCR048W	YCR048W	32.2874	26.5961	1.21399	0.0261895					YBL046W	YBL046W	37.3853	30.7641	1.21522	0.0423719					YNL146W	YNL146W	36.5031	30.2475	1.20681	0.0347224
YHR097C	YHR097C	32.3452	26.6441	1.21397	0.0257906					YJR010C-A	YJR010C-A	35.4371	29.1611	1.21522	0.042278					YLR064W	YLR064W	38.5556	31.9487	1.2068	0.0344283
YGR143W	YGR143W	34.6221	28.5197	1.21397	0.0257298					YLR097C	YLR097C	35.7533	29.4217	1.2152	0.0419498					YPL018W	YPL018W	36.3498	30.121	1.20679	0.034291
YIL148W	YIL148W	35.4778	29.2248	1.21396	0.0255955					YER183C	YER183C	37.0231	30.4667	1.2152	0.0419408					YGL216W	YGL216W	36.0894	29.9053	1.20679	0.0342414
YPL201C	YPL201C	33.8523	27.8858	1.21396	0.0255939					YOR108W	YOR108W	36.7741	30.2621	1.21519	0.0417161					YBL081W	YBL081W	38.7445	32.1055	1.20679	0.0341972
YMR215W	YMR215W	33.4124	27.5236	1.21396	0.0254718					YER116C	YER116C	38.1789	31.4182	1.21518	0.0416294					YNL092W	YNL092W	36.7262	30.4334	1.20677	0.0339157
YIR016W	YIR016W	33.6861	27.7492	1.21395	0.0253866					YOR280C	YOR280C	36.1402	29.7407	1.21518	0.0415085					YOL104C	YOL104C	36.3716	30.1398	1.20676	0.03373
YPL024W	YPL024W	34.7448	28.6214	1.21394	0.0252641					YLL025W	YLL025W	36.5787	30.1016	1.21518	0.0415003					YIL120W	YIL120W	35.2225	29.1877	1.20676	0.0336551
YDR242W	YDR242W	32.4993	26.7718	1.21394	0.0251911					YER128W	YER128W	36.8105	30.2924	1.21517	0.0414521					YGR263C	YGR263C	36.7003	30.4123	1.20676	0.0335952
YIL120W	YIL120W	32.9475	27.1425	1.21387	0.0237962					YJR117W	YJR117W	32.9262	27.096	1.21517	0.0413176					YEL017C-A	YEL017C-A	36.3292	30.1049	1.20675	0.0335643
YML123C	YML123C	32.4032	26.6945	1.21385	0.023438					YBR273C	YBR273C	36.4603	30.0045	1.21516	0.0411986					YMR315W	YMR315W	36.4834	30.2338	1.20671	0.0326602
YOR101W	YOR101W	32.5045	26.7781	1.21385	0.0233355					YBR051W	YBR051W	34.724	28.5757	1.21516	0.0411052					YMR322C	YMR322C	35.0476	29.0441	1.2067	0.0325849
YDR445C	YDR445C	33.5656	27.6525	1.21384	0.0230949					YER058W	YER058W	37.0813	30.5167	1.21511	0.0403142					YBL028C	YBL028C	36.6886	30.4042	1.2067	0.0324188
YJR053W	YJR053W	34.2867	28.2467	1.21383	0.0230061					YDL110C	YDL110C	35.8596	29.5115	1.2151	0.0401472					YOL009C	YOL009C	36.1025	29.9191	1.20667	0.0319669
YIL059C	YIL059C	32.0855	26.4333	1.21383	0.0229625					YNR037C	YNR037C	33.7404	27.7678	1.21509	0.0398788					YER048C	YER048C	37.8439	31.3623	1.20667	0.0318931
YGL107C	YGL107C	32.6328	26.8845	1.21381	0.0226459					YML030W	YML030W	35.6605	29.3481	1.21509	0.0398607					YLR356W	YLR356W	35.0891	29.0794	1.20667	0.0318589
YNL016W	YNL016W	33.564	27.6519	1.2138	0.0224914					YEL007W	YEL007W	39.9759	32.8998	1.21508	0.0396649					YDL094C	YDL094C	34.7653	28.8113	1.20666	0.0316497
YLR217W	YLR217W	32.4982	26.7742	1.21378	0.0220954					YDR093W	YDR093W	35.5463	29.255	1.21505	0.039129					YNL234W	YNL234W	35.962	29.8044	1.2066	0.0305722
YPR020W	YPR020W	32.7333	26.9681	1.21378	0.0220434					YJL006C	YJL006C	40.4788	33.3149	1.21504	0.0388412					YBR107C	YBR107C	35.553	29.4656	1.20659	0.0303946
YNR062C	YNR062C	33.0018	27.1897	1.21376	0.0216891					YHL002W	YHL002W	34.8454	28.6786	1.21503	0.0387901					YKR049C	YKR049C	35.5649	29.4768	1.20654	0.0293696
YGL081W	YGL081W	34.6178	28.5212	1.21376	0.0215353					YER114C	YER114C	36.3111	29.885	1.21503	0.0387006					YDR083W	YDR083W	35.404	29.344	1.20652	0.0289244
YDR285W	YDR285W	34.6663	28.5613	1.21375	0.021443					YAL043C-A	YAL043C-A	35.4252	29.1563	1.21501	0.038412					YML066C	YML066C	37.657	31.2116	1.20651	0.0287397
YHR138C	YHR138C	34.2435	28.2134	1.21373	0.021032					YDR536W	YDR536W	35.7383	29.414	1.21501	0.0383266					YLR089C	YLR089C	34.7671	28.8166	1.2065	0.0285664
YKR036C	YKR036C	33.5133	27.6122	1.21372	0.0207161					YOR328W	YOR328W	34.5386	28.4269	1.215	0.0381277					YMR041C	YMR041C	34.3496	28.4716	1.20645	0.0276644
YER117W	YER117W	33.0596	27.2385	1.21371	0.0206014					YDR089W	YDR089W	35.2908	29.0461	1.215	0.0380726					YPL254W	YPL254W	37.3721	30.9774	1.20643	0.027308
YER176W	YER176W	35.1714	28.9786	1.2137	0.020502					YKL191W	YKL191W	37.8649	31.1649	1.21498	0.0378528					YGR242W	YGR242W	36.6124	30.3478	1.20643	0.0272203
YLL014W	YLL014W	34.7427	28.6257	1.21369	0.0202401					YOL058W	YOL058W	35.3517	29.0965	1.21498	0.037779					YGL060W	YGL060W	36.7791	30.4862	1.20642	0.027036
YNL098C	YNL098C	33.6817	27.7515	1.21369	0.0202239					YBL082C	YBL082C	37.43	30.8074	1.21497	0.037575					YMR293C	YMR293C	34.2973	28.4296	1.2064	0.0266032
YOL002C	YOL002C	33.1188	27.2878	1.21369	0.0201741					YLR038C	YLR038C	34.4209	28.3309	1.21496	0.0374032					YER180C	YER180C	35.7927	29.6692	1.20639	0.0265179
YOR104W	YOR104W	33.5543	27.6466	1.21369	0.0201599					YBR007C	YBR007C	36.5404	30.0758	1.21494	0.037081					YPR192W	YPR192W	35.5501	29.4682	1.20639	0.0264564
YJR144W	YJR144W	32.7775	27.0068	1.21368	0.019955					YLL052C	YLL052C	36.8795	30.3552	1.21493	0.036886					YOL002C	YOL002C	35.627	29.532	1.20639	0.026425
YOR091W	YOR091W	34.1136	28.1077	1.21368	0.0199415					YAL022C	YAL022C	35.6465	29.3406	1.21492	0.0366146					YLR428C	YLR428C	35.4936	29.4215	1.20638	0.0263243
YBR262C	YBR262C	32.176	26.5113	1.21367	0.0198308					YOR381W	YOR381W	35.6138	29.3143	1.2149	0.0361823					YGL107C	YGL107C	35.1024	29.0976	1.20637	0.0260527
YJL210W	YJL210W	32.7878	27.0156	1.21366	0.0196147					YPL263C	YPL263C	36.7887	30.2815	1.21489	0.036096					YOL052C	YOL052C	36.459	30.2226	1.20635	0.0256789
YGR275W	YGR275W	34.2465	28.2176	1.21366	0.0195402					YOR352W	YOR352W	35.4017	29.1399	1.21489	0.0360046					YHL026C	YHL026C	34.6549	28.7272	1.20634	0.0256031
YLR095C	YLR095C	33.0626	27.2422	1.21366	0.0195375					YLR135W	YLR135W	35.8225	29.4865	1.21488	0.0358094					YBL043W	YBL043W	36.4512	30.2165	1.20633	0.0253496
YBR105C	YBR105C	33.9039	27.9355	1.21365	0.019428					YBR041W	YBR041W	35.8308	29.4935	1.21487	0.0357276					YPL177C	YPL177C	36.9306	30.6141	1.20632	0.0252118
YHR039C	YHR039C	31.9215	26.302	1.21365	0.0194249					YIL045W	YIL045W	36.0696	29.6903	1.21486	0.0355702					YMR145C	YMR145C	36.9514	30.6314	1.20632	0.0251911
YNL193W	YNL193W	32.9132	27.1195	1.21363	0.0190973					YJL218W	YJL218W	33.8679	27.8781	1.21486	0.0355127					YNL119W	YNL119W	37.2177	30.8524	1.20631	0.0250159
YDR078C	YDR078C	32.5964	26.8597	1.21358	0.0180187					YDR051C	YDR051C	37.1144	30.5505	1.21486	0.0354373					YDR043C	YDR043C	36.2968	30.089	1.20631	0.0249918
YML055W	YML055W	32.9371	27.1407	1.21357	0.0177784					YLR054C	YLR054C	35.8213	29.4862	1.21485	0.0353142					YER068C-A	YER068C-A	36.1595	29.9755	1.2063	0.0247304
YMR119W	YMR119W	33.291	27.4332	1.21353	0.0170742					YMR316C-A	YMR316C-A	35.44	29.1724	1.21485	0.0352678					YER062C	YER062C	35.1057	29.1028	1.20627	0.0240559
YIL058W	YIL058W	32.3263	26.6382	1.21353	0.0170419					YDL114W	YDL114W	35.5976	29.3024	1.21483	0.0350409					YOR005C	YOR005C	37.1632	30.8091	1.20624	0.0235286
YKR009C	YKR009C	33.152	27.3191	1.21351	0.016713					YPR084W	YPR084W	35.1966	28.9724	1.21483	0.0349895					YPL081W	YPL081W	36.858	30.5562	1.20624	0.0234981
YDL172C	YDL172C	33.6172	27.7026	1.2135	0.0165309					YBR014C	YBR014C	35.1352	28.9231	1.21478	0.0340545					YCR071C	YCR071C	35.8447	29.7161	1.20624	0.0234854
YLR063W	YLR063W	33.1259	27.2978	1.2135	0.0164558					YMR194C-A	YMR194C-A	35.8427	29.506	1.21476	0.0336503					YDR254W	YDR254W	38.1513	31.6284	1.20624	0.0234811
YGL231C	YGL231C	33.2815	27.4261	1.2135	0.0164197					YOR202W	YOR202W	35.9924	29.6292	1.21476	0.0336216					YHL011C	YHL011C	32.4407	26.8942	1.20623	0.0234421
YOR348C	YOR348C	33.862	27.9047	1.21349	0.016235					YEL067C	YEL067C	36.2145	29.8123	1.21475	0.0334182					YML121W	YML121W	34.7605	28.8175	1.20623	0.023382
YLR137W	YLR137W	33.2759	27.4221	1.21347	0.0158808					YOR140W	YOR140W	37.099	30.5407	1.21474	0.0332675					YIL069C	YIL069C	40.1689	33.3022	1.20619	0.0226522
YNL134C	YNL134C	33.2901	27.4339	1.21347	0.0157796					YEL025C	YEL025C	36.7164	30.2258	1.21474	0.0331978					YCL034W	YCL034W	36.9773	30.6564	1.20619	0.0225514
YDL086W	YDL086W	33.4152	27.5374	1.21345	0.015444					YER069W	YER069W	35.4214	29.1598	1.21474	0.0331575					YLL017W	YLL017W	36.8117	30.5191	1.20619	0.0225392
YPL111W	YPL111W	33.8082	27.8616	1.21343	0.0151319					YOR111W	YOR111W	37.7066	31.0415	1.21472	0.0327779					YBL102W	YBL102W	35.893	29.7582	1.20615	0.0218735
YLR207W	YLR207W	32.615	26.8783	1.21343	0.0151245					YGL029W	YGL029W	34.2859	28.2255	1.21471	0.0327664					YER123W	YER123W	37.0763	30.7398	1.20613	0.0214895
YLR171W	YLR171W	34.1286	28.1257	1.21343	0.0151029					YOR028C	YOR028C	36.2573	29.8486	1.2147	0.0325771					YJR078W	YJR078W	35.5293	29.4575	1.20612	0.0212268
YPL002C	YPL002C	33.3061	27.4484	1.21341	0.0146144					YPL253C	YPL253C	36.1002	29.7196	1.21469	0.0323505					YMR139W	YMR139W	34.8089	28.8603	1.20612	0.0212088
YGL060W	YGL060W	34.2353	28.2145	1.2134	0.0143974					YBL045C	YBL045C	34.8585	28.6974	1.21469	0.0323293					YPR132W	YPR132W	35.5889	29.5076	1.20609	0.0206522
YHR104W	YHR104W	34.3877	28.3405	1.21337	0.0139525					YHR017W	YHR017W	36.0042	29.6407	1.21469	0.0322395					YJL160C	YJL160C	35.4075	29.3573	1.20609	0.0205887
YBR120C	YBR120C	32.1488	26.4956	1.21336	0.013741					YJL123C	YJL123C	39.4081	32.4435	1.21467	0.031893					YCL011C	YCL011C	35.209	29.1929	1.20608	0.0205119
YNR047W	YNR047W	34.0162	28.0349	1.21335	0.0134629					YNL098C	YNL098C	37.0804	30.5282	1.21463	0.0311147					YIL073C	YIL073C	36.1297	29.9569	1.20606	0.0199886
YMR129W	YMR129W	33.0366	27.2278	1.21334	0.0133316					YLR228C	YLR228C	35.958	29.6048	1.2146	0.0305428					YER042W	YER042W	37.2636	30.8971	1.20606	0.0199744
YAR014C	YAR014C	35.0118	28.8558	1.21334	0.0132393					YHR008C	YHR008C	36.6385	30.1658	1.21457	0.0300244					YJL110C	YJL110C	34.2279	28.3802	1.20605	0.0198632
YLL046C	YLL046C	35.9923	29.6641	1.21333	0.0130165					YMR304W	YMR304W	36.6999	30.2167	1.21456	0.0297603					YOR134W	YOR134W	36.6446	30.3842	1.20604	0.0196958
YDL034W	YDL034W	32.8892	27.1067	1.21332	0.0129476					YJL177W	YJL177W	34.4863	28.3945	1.21454	0.0294905					YMR316C-B	YMR316C-B	35.9324	29.7938	1.20603	0.0195757
YGL153W	YGL153W	33.9338	27.9684	1.21329	0.0122705					YJL108C	YJL108C	36.5131	30.0636	1.21453	0.029246					YOL092W	YOL092W	36.6315	30.3745	1.20599	0.0187898
YKL150W	YKL150W	33.8233	27.8775	1.21329	0.0122134					YGL159W	YGL159W	36.0407	29.6748	1.21452	0.0291166					YMR256C	YMR256C	33.5827	27.8466	1.20599	0.018664
YPL029W	YPL029W	32.6528	26.9127	1.21329	0.0121994					YHR163W	YHR163W	37.0426	30.5011	1.21447	0.0280937					YDR477W	YDR477W	38.3135	31.7695	1.20598	0.0185643
YOL158C	YOL158C	34.0821	28.091	1.21327	0.0119721					YOR184W	YOR184W	36.5449	30.0914	1.21446	0.0279557					YNL194C	YNL194C	35.6872	29.5922	1.20597	0.0182671
YER154W	YER154W	33.5024	27.6134	1.21327	0.0118684					YLL054C	YLL054C	34.9972	28.8172	1.21445	0.0278401					YIR016W	YIR016W	36.9899	30.6728	1.20595	0.0179934
YBR082C	YBR082C	36.0026	29.6741	1.21327	0.0118352					YHR152W	YHR152W	35.8771	29.5418	1.21445	0.0277396					YOR064C	YOR064C	37.5045	31.0996	1.20595	0.0178766
YMR135W-A	YMR135W-A	32.1287	26.4812	1.21326	0.0117971					YFR056C	YFR056C	38.6235	31.8034	1.21445	0.02769					YBR216C	YBR216C	37.4058	31.0183	1.20593	0.0174782
YOL013C	YOL013C	32.3613	26.673	1.21326	0.0116799					YNL029C	YNL029C	35.6193	29.3312	1.21438	0.026459					YNL294C	YNL294C	36.4093	30.1922	1.20592	0.0172876
YOR283W	YOR283W	34.3939	28.3491	1.21323	0.0110204					YLR003C	YLR003C	37.33	30.7399	1.21438	0.0264505					YLR104W	YLR104W	35.2182	29.2046	1.20591	0.0172073
YER109C	YER109C	33.9704	28.0008	1.21319	0.0104046					YML055W	YML055W	36.0561	29.6911	1.21437	0.0263347					YER106W	YER106W	35.5138	29.4499	1.20591	0.0170697
YLL054C	YLL054C	32.8451	27.0734	1.21319	0.0102343					YJR144W	YJR144W	35.5342	29.2618	1.21436	0.0259812					YBR099C	YBR099C	35.3955	29.3519	1.2059	0.016968
YKL115C	YKL115C	33.1296	27.3081	1.21318	0.0101287					YPR045C	YPR045C	38.7272	31.8913	1.21435	0.0258766					YPL225W	YPL225W	37.5934	31.1753	1.20587	0.0163658
YPR116W	YPR116W	32.0731	26.4372	1.21318	0.0101182					YOR365C	YOR365C	35.4933	29.2295	1.2143	0.0248592					YOR238W	YOR238W	36.9987	30.6824	1.20586	0.0161491
YPL258C	YPL258C	33.8703	27.919	1.21316	0.00974441					YGR263C	YGR263C	36.2492	29.8521	1.21429	0.0247906					YHR112C	YHR112C	36.0959	29.9339	1.20585	0.0160079
YNL229C	YNL229C	40.3381	33.2508	1.21315	0.00946881					YLR180W	YLR180W	37.2985	30.7163	1.21429	0.0247208					YDL161W	YDL161W	35.9786	29.8367	1.20585	0.0159847
YHR202W	YHR202W	34.865	28.7394	1.21314	0.0093209					YMR090W	YMR090W	35.4779	29.2173	1.21428	0.0245466					YML129C	YML129C	35.0856	29.0963	1.20584	0.0158564
YBL046W	YBL046W	34.4547	28.4015	1.21313	0.00912079					YNL105W	YNL105W	36.0005	29.6476	1.21428	0.0245265					YPL054W	YPL054W	35.66	29.573	1.20583	0.0155492
YLR210W	YLR210W	32.587	26.8621	1.21312	0.00897653					YFL018C	YFL018C	37.2652	30.6903	1.21424	0.0237123					YJR044C	YJR044C	35.881	29.7568	1.20581	0.0151922
YGR204W	YGR204W	32.3577	26.6731	1.21312	0.00895316					YOR055W	YOR055W	37.2715	30.6957	1.21423	0.0235192					YDR313C	YDR313C	35.8333	29.7172	1.20581	0.0151707
YOR305W	YOR305W	32.0729	26.4384	1.21312	0.0088999					YKR014C	YKR014C	44.188	36.3919	1.21423	0.0235146					YER054C	YER054C	36.7821	30.5049	1.20578	0.0145779
YJL150W	YJL150W	33.6037	27.7004	1.21311	0.00878692					YBL081W	YBL081W	37.7409	31.0823	1.21423	0.0235139					YPL134C	YPL134C	36.1498	29.9808	1.20577	0.0143644
YHR091C	YHR091C	30.3803	25.0434	1.21311	0.00863319					YBR209W	YBR209W	36.428	30.0025	1.21417	0.0224017					YLR448W	YLR448W	34.4521	28.5728	1.20576	0.0142883
YHR179W	YHR179W	34.5497	28.4807	1.21309	0.00834848					YDL138W	YDL138W	35.8453	29.5228	1.21416	0.022232					YNL217W	YNL217W	35.9096	29.782	1.20575	0.014051
YKR003W	YKR003W	33.0629	27.2551	1.21309	0.00828275					YOR083W	YOR083W	32.7556	26.9782	1.21415	0.0221651					YBR150C	YBR150C	36.4588	30.2374	1.20575	0.0140158
YDL194W	YDL194W	33.364	27.5037	1.21307	0.00800597					YHL024W	YHL024W	35.3272	29.0964	1.21415	0.0220184					YOL011W	YOL011W	36.6169	30.3689	1.20574	0.0138088
YOR202W	YOR202W	33.2464	27.4069	1.21307	0.00789167					YPR013C	YPR013C	35.1037	28.9126	1.21413	0.021737					YHR124W	YHR124W	36.9636	30.657	1.20572	0.0134013
YDR147W	YDR147W	31.8779	26.2788	1.21306	0.00781414					YER073W	YER073W	35.0556	28.8734	1.21411	0.0214104					YOR093C	YOR093C	38.0495	31.5576	1.20572	0.0133757
YDR430C	YDR430C	32.5926	26.8686	1.21304	0.0072726					YKL067W	YKL067W	33.7378	27.7881	1.21411	0.0213231					YJL154C	YJL154C	35.1391	29.1443	1.2057	0.0130106
YBR292C	YBR292C	34.2238	28.2136	1.21302	0.00701392					YDL213C	YDL213C	35.4291	29.1812	1.21411	0.0213182					YIL029C	YIL029C	37.3629	30.9889	1.20568	0.0127729
YOR280C	YOR280C	33.2985	27.451	1.21302	0.00688667					YOL001W	YOL001W	34.7837	28.6498	1.2141	0.021164					YDR105C	YDR105C	36.927	30.6281	1.20566	0.0122648
YPR145W	YPR145W	31.4253	25.9071	1.213	0.00654406					YDL123W	YDL123W	36.2997	29.8986	1.21409	0.0210281					YGR031W	YGR031W	35.6886	29.6013	1.20564	0.011921
YIL133C	YIL133C	32.0415	26.4151	1.213	0.00652348					YPR126C	YPR126C	37.1846	30.6276	1.21409	0.020895					YOL155C	YOL155C	35.7926	29.6876	1.20564	0.0119095
YEL025C	YEL025C	33.5014	27.6187	1.213	0.00650556					YER020W	YER020W	36.3273	29.9216	1.21408	0.0208447					YOR364W	YOR364W	35.8511	29.7367	1.20562	0.0114797
YGL094C	YGL094C	34.7237	28.6264	1.213	0.00645382					YPL065W	YPL065W	37.2743	30.7024	1.21405	0.020271					YDR109C	YDR109C	35.1794	29.18	1.2056	0.0111382
YMR162C	YMR162C	33.147	27.3267	1.21299	0.00641426					YGL125W	YGL125W	35.8005	29.4885	1.21405	0.0202428					YOR201C	YOR201C	36.9176	30.6225	1.20557	0.0105946
YIL137C	YIL137C	33.9217	27.9654	1.21299	0.00632363					YDR077W	YDR077W	35.5914	29.3163	1.21405	0.0201753					YEL001C	YEL001C	36.2876	30.0999	1.20557	0.0105284
YOR121C	YOR121C	34.1176	28.1275	1.21296	0.00584129					YDL178W	YDL178W	35.1739	28.9726	1.21404	0.020033					YOR083W	YOR083W	31.962	26.5126	1.20554	0.00995833
YHR160C	YHR160C	33.0697	27.2644	1.21293	0.00507918					YNR039C	YNR039C	34.7653	28.6361	1.21404	0.0199628					YKL096W	YKL096W	36.0287	29.8865	1.20552	0.00956405
YNL165W	YNL165W	33.8716	27.9257	1.21292	0.00498075					YOR334W	YOR334W	35.7379	29.4374	1.21403	0.0198522					YGR050C	YGR050C	34.9399	28.9841	1.20549	0.0089357
YKR023W	YKR023W	33.2184	27.3871	1.21292	0.00496652					YDR383C	YDR383C	35.6276	29.3469	1.21402	0.0195973					YBR125C	YBR125C	35.3998	29.3659	1.20547	0.00867303
YLR362W	YLR362W	35.0116	28.8656	1.21292	0.00489464					YGR276C	YGR276C	38.2152	31.4793	1.21398	0.0188345					YGL175C	YGL175C	36.8735	30.5891	1.20545	0.00811889
YLR304C	YLR304C	32.8954	27.121	1.21291	0.00480374					YKL215C	YKL215C	35.7568	29.4545	1.21397	0.0186289					YNR047W	YNR047W	35.6186	29.5485	1.20543	0.00781682
YKR093W	YKR093W	34.2238	28.2166	1.21289	0.00441273					YGL064C	YGL064C	35.7728	29.4677	1.21397	0.0186191					YLR063W	YLR063W	35.8394	29.7317	1.20543	0.00776405
YJL030W	YJL030W	32.4048	26.7179	1.21285	0.00358123					YDL054C	YDL054C	35.3073	29.0847	1.21395	0.0182421					YLR001C	YLR001C	37.491	31.102	1.20542	0.00763462
YLR139C	YLR139C	33.9789	28.0157	1.21285	0.00357733					YDL071C	YDL071C	33.9669	27.9809	1.21393	0.0179652					YOR317W	YOR317W	35.7651	29.6705	1.20541	0.00745155
YBL001C	YBL001C	34.8838	28.7621	1.21284	0.00335434					YNR070W	YNR070W	37.7685	31.1131	1.21391	0.0175918					YDR285W	YDR285W	37.4058	31.0324	1.20538	0.00683903
YDL109C	YDL109C	33.3804	27.5226	1.21284	0.00328723					YHR195W	YHR195W	36.4839	30.0557	1.21388	0.0169174					YPL268W	YPL268W	38.9459	32.3102	1.20538	0.00676719
YOL031C	YOL031C	34.2282	28.2218	1.21283	0.00310699					YNL268W	YNL268W	35.1763	28.9788	1.21387	0.0167125					YJR066W	YJR066W	36.4459	30.2363	1.20537	0.0066854
YNL314W	YNL314W	34.0124	28.044	1.21283	0.0030773					YGR066C	YGR066C	35.4442	29.1998	1.21385	0.016461					YMR135C	YMR135C	36.6417	30.3988	1.20537	0.00662779
YGR213C	YGR213C	33.529	27.6455	1.21282	0.00294777					YDL037C	YDL037C	35.5978	29.3271	1.21382	0.0158421					YBR270C	YBR270C	36.4438	30.2346	1.20537	0.0065657
YMR026C	YMR026C	34.0948	28.1124	1.2128	0.00263322					YNL146W	YNL146W	35.8532	29.538	1.2138	0.0154586					YPR172W	YPR172W	34.7967	28.8684	1.20535	0.00635694
YBR058C	YBR058C	35.0951	28.9376	1.21279	0.00233487					YHR179W	YHR179W	37.4987	30.8939	1.21379	0.0152926					YGL244W	YGL244W	36.9566	30.6607	1.20534	0.00611779
YDL199C	YDL199C	33.2825	27.4431	1.21278	0.00224483					YCR017C	YCR017C	37.6592	31.0262	1.21378	0.0151762					YFL015C	YFL015C	35.9914	29.861	1.2053	0.0053123
YDR329C	YDR329C	33.764	27.8407	1.21276	0.00177282					YMR228W	YMR228W	35.6298	29.3549	1.21376	0.0147231					YOR270C	YOR270C	35.8216	29.7203	1.20529	0.00506451
YNL145W	YNL145W	32.6473	26.9202	1.21274	0.00145465					YIL025C	YIL025C	36.7781	30.3013	1.21375	0.0144723					YDL124W	YDL124W	37.0524	30.742	1.20527	0.00469553
YBL022C	YBL022C	33.7458	27.8261	1.21274	0.00136155					YPR145W	YPR145W	34.6711	28.5654	1.21374	0.0144191					YPL194W	YPL194W	36.5832	30.3528	1.20527	0.00462021
YPL225W	YPL225W	34.8533	28.7395	1.21273	0.00121569					YOL152W	YOL152W	36.5032	30.0749	1.21374	0.0143868					YLL051C	YLL051C	36.8941	30.6115	1.20524	0.00407341
YLL052C	YLL052C	35.055	28.9059	1.21273	0.00121042					YIL028W	YIL028W	39.7912	32.785	1.2137	0.0136408					YHR130C	YHR130C	35.5599	29.5053	1.20521	0.00348529
YLR369W	YLR369W	34.6579	28.5791	1.2127	0.000632537					YER066C-A	YER066C-A	34.39	28.3349	1.2137	0.0135441					YGL156W	YGL156W	34.868	28.9315	1.20519	0.00322534
YKR016W	YKR016W	32.2059	26.5573	1.2127	0.00053367					YER005W	YER005W	37.4451	30.8527	1.21367	0.0130788					YNL058C	YNL058C	35.8489	29.7454	1.20519	0.00318375
YDR169C	YDR169C	34.8204	28.7132	1.2127	0.000503427					YGR068C	YGR068C	36.2157	29.84	1.21366	0.012887					YCR100C	YCR100C	36.057	29.9182	1.20518	0.00304155
YLR191W	YLR191W	35.0336	28.8892	1.21269	0.000342214					YOL020W	YOL020W	34.9567	28.8026	1.21366	0.0128662					YNL106C	YNL106C	35.2685	29.2649	1.20515	0.00237851
YBR014C	YBR014C	33.4178	27.5569	1.21268	0.000248946					YJL163C	YJL163C	37.8727	31.2055	1.21366	0.0127304					YJL068C	YJL068C	34.0585	28.2613	1.20513	0.0019768
YPR166C	YPR166C	31.7179	26.1552	1.21268	0.000216738					YGL179C	YGL179C	34.8213	28.6913	1.21365	0.0126679					YFR039C	YFR039C	35.5359	29.4876	1.20511	0.0016962
YNL213C	YNL213C	31.2687	25.7849	1.21268	0.000141383					YKL194C	YKL194C	35.7714	29.4744	1.21365	0.0125342					YJR104C	YJR104C	37.2674	30.9248	1.2051	0.00133686
YOL152W	YOL152W	34.6936	28.6093	1.21267	-3.28942e-05					YGR235C	YGR235C	37.044	30.5237	1.21361	0.0119257					YML036W	YML036W	36.7554	30.5003	1.20508	0.00110417
YJL217W	YJL217W	32.6833	26.9516	1.21267	-5.0115e-05					YBR083W	YBR083W	34.4534	28.3892	1.21361	0.0118521					YDL131W	YDL131W	36.5604	30.339	1.20506	0.000708025
YBL091C-A	YBL091C-A	34.3601	28.3344	1.21266	-0.00010548					YNL134C	YNL134C	35.7499	29.4578	1.2136	0.0116119					YLR270W	YLR270W	36.3805	30.1897	1.20506	0.000688674
YBL075C	YBL075C	33.4811	27.6096	1.21266	-0.000164782					YOR170W	YOR170W	37.8028	31.1497	1.21358	0.0113877					YOR180C	YOR180C	36.8688	30.5952	1.20505	0.000497904
YBL037W	YBL037W	33.7288	27.8141	1.21265	-0.000339625					YPL188W	YPL188W	36.3268	29.9336	1.21358	0.0112919					YDR242W	YDR242W	34.8303	28.9037	1.20505	0.000349485
YMR305C	YMR305C	33.6072	27.7139	1.21265	-0.00043322					YDR279W	YDR279W	38.9158	32.0674	1.21356	0.0109815					YKR007W	YKR007W	36.7973	30.5362	1.20504	0.000263506
YGR035C	YGR035C	33.3384	27.4923	1.21264	-0.000516809					YOR316C	YOR316C	34.7956	28.6733	1.21352	0.0101515					YGL118C	YGL118C	34.7405	28.8296	1.20503	7.44333e-05
YLR194C	YLR194C	33.8858	27.9439	1.21263	-0.000693157					YOR018W	YOR018W	36.4384	30.0271	1.21352	0.01011					YLR171W	YLR171W	35.8847	29.7794	1.20502	-0.000209212
YML089C	YML089C	32.3001	26.6368	1.21261	-0.0011276					YLR089C	YLR089C	34.1903	28.1748	1.2135	0.00987564					YOL150C	YOL150C	35.7862	29.6984	1.20499	-0.000752872
YDR011W	YDR011W	33.3395	27.4942	1.2126	-0.00131681					YNL100W	YNL100W	33.9336	27.9633	1.2135	0.00987158					YDR152W	YDR152W	36.4795	30.2741	1.20497	-0.00107728
YDL227C	YDL227C	32.6727	26.9444	1.2126	-0.00139225					YKL139W	YKL139W	48.563	40.019	1.2135	0.00972576					YOR133W	YOR133W	37.2707	30.9308	1.20497	-0.00110712
YMR065W	YMR065W	32.8106	27.0581	1.2126	-0.00139757					YER143W	YER143W	36.5198	30.0949	1.21349	0.00960597					YGR270W	YGR270W	34.5428	28.6671	1.20496	-0.00125321
YJL149W	YJL149W	35.3244	29.1316	1.21258	-0.0017157					YNL155W	YNL155W	35.8086	29.5088	1.21349	0.00960199					YPR117W	YPR117W	35.5764	29.5251	1.20495	-0.00145339
YGL261C	YGL261C	31.9649	26.3614	1.21256	-0.00211053					YPL230W	YPL230W	36.6064	30.1665	1.21348	0.00936904					YKL005C	YKL005C	35.5521	29.5055	1.20493	-0.00185023
YJL138C	YJL138C	34.9426	28.8175	1.21255	-0.00244967					YDL233W	YDL233W	36.0931	29.7444	1.21344	0.00864395					YDL237W	YDL237W	35.7488	29.6694	1.20491	-0.00233155
YMR064W	YMR064W	31.8923	26.3022	1.21253	-0.00267692					YDL094C	YDL094C	34.9146	28.7736	1.21343	0.00838384					YBR084W	YBR084W	35.925	29.8158	1.2049	-0.00249934
YDR127W	YDR127W	34.7092	28.6255	1.21253	-0.00283756					YKL005C	YKL005C	35.7817	29.4884	1.21341	0.00816898					YPL229W	YPL229W	36.834	30.5706	1.20488	-0.00282683
YNL106C	YNL106C	33.5956	27.7071	1.21253	-0.0028591					YGL196W	YGL196W	36.7225	30.2641	1.2134	0.00792505					YBL101C	YBL101C	36.7227	30.4783	1.20488	-0.00291853
YBL093C	YBL093C	31.9776	26.3731	1.21251	-0.00319058					YGR206W	YGR206W	36.2619	29.8859	1.21335	0.00688564					YMR097C	YMR097C	34.1863	28.3733	1.20488	-0.00296051
YFL047W	YFL047W	33.9153	27.9712	1.21251	-0.00322659					YPL127C	YPL127C	34.6529	28.5598	1.21335	0.00686849					YJL213W	YJL213W	35.9414	29.8302	1.20487	-0.00314327
YDR152W	YDR152W	33.4675	27.602	1.2125	-0.00331646					YHL040C	YHL040C	37.3679	30.7974	1.21335	0.00686836					YIL074C	YIL074C	35.6907	29.6226	1.20485	-0.0035359
YBL070C	YBL070C	33.84	27.91	1.21247	-0.00399686					YNL239W	YNL239W	36.2439	29.8711	1.21334	0.00682179					YLR332W	YLR332W	37.7045	31.2941	1.20484	-0.00359583
YFR014C	YFR014C	32.6991	26.9692	1.21246	-0.00410074					YBR010W	YBR010W	37.0441	30.5309	1.21333	0.0065913					YBL012C	YBL012C	33.9805	28.2034	1.20484	-0.00368537
YOL100W	YOL100W	33.6634	27.7647	1.21245	-0.00429688					YDR254W	YDR254W	37.6418	31.0235	1.21333	0.00657259					YIL086C	YIL086C	35.0297	29.0747	1.20482	-0.00410463
YGL109W	YGL109W	34.004	28.0458	1.21244	-0.00447281					YLR295C	YLR295C	34.6423	28.5515	1.21333	0.00650919					YDL128W	YDL128W	35.8358	29.7438	1.20481	-0.00415665
YLR346C	YLR346C	34.1842	28.1948	1.21243	-0.00472364					YAL029C	YAL029C	35.7483	29.4631	1.21332	0.00646661					YPL201C	YPL201C	36.1205	29.9802	1.20481	-0.00418782
YNR051C	YNR051C	35.2708	29.0912	1.21242	-0.0048887					YJL065C	YJL065C	36.0992	29.7524	1.21332	0.00638364					YDR244W	YDR244W	37.067	30.7661	1.2048	-0.00443775
YOR365C	YOR365C	33.898	27.9594	1.2124	-0.00529885					YLR232W	YLR232W	35.835	29.5349	1.21331	0.0061897					YOL132W	YOL132W	34.9715	29.0277	1.20477	-0.00508771
YCR020W-B	YCR020W-B	41.8579	34.5253	1.21238	-0.00569777					YLR372W	YLR372W	34.3925	28.3463	1.2133	0.0059908					YJL132W	YJL132W	35.075	29.1136	1.20476	-0.00514776
YOR022C	YOR022C	33.1717	27.3613	1.21236	-0.00617001					YLR382C	YLR382C	33.6452	27.7321	1.21322	0.0045236					YOR266W	YOR266W	38.2135	31.7189	1.20476	-0.0052913
YBL102W	YBL102W	33.2382	27.4163	1.21235	-0.0063073					YGR208W	YGR208W	35.5915	29.3364	1.21322	0.00450436					YDR075W	YDR075W	36.1569	30.0119	1.20475	-0.00531101
YLL041C	YLL041C	34.0147	28.0572	1.21233	-0.00664191					YMR082C	YMR082C	35.8774	29.5722	1.21322	0.00443836					YBR058C	YBR058C	37.6897	31.2842	1.20475	-0.00537843
YEL001C	YEL001C	34.2021	28.2121	1.21232	-0.00697428					YLR239C	YLR239C	35.0021	28.8508	1.21321	0.0043188					YER052C	YER052C	38.2747	31.7699	1.20475	-0.00548503
YNL058C	YNL058C	33.9356	27.9924	1.21231	-0.00704292					YER173W	YER173W	36.8796	30.3988	1.21319	0.00400885					YDR084C	YDR084C	35.7977	29.7141	1.20474	-0.005644
YNL093W	YNL093W	34.3865	28.3644	1.21231	-0.00714881					YCR102C	YCR102C	35.797	29.5067	1.21318	0.00376567					YBR188C	YBR188C	36.5604	30.3473	1.20474	-0.00566803
YLL001W	YLL001W	34.1277	28.151	1.21231	-0.00722045					YDR075W	YDR075W	36.0091	29.6817	1.21317	0.0036349					YLR371W	YLR371W	34.5513	28.6801	1.20471	-0.00607863
YBL028C	YBL028C	33.7535	27.8429	1.21229	-0.00761117					YNL116W	YNL116W	36.4738	30.0657	1.21314	0.00290194					YPR074C	YPR074C	36.5129	30.3085	1.20471	-0.00619415
YGR066C	YGR066C	33.55	27.675	1.21228	-0.00767118					YBL096C	YBL096C	35.1675	28.9892	1.21313	0.00272595					YBL069W	YBL069W	34.9954	29.0492	1.20469	-0.00652718
YOL092W	YOL092W	34.8538	28.7508	1.21227	-0.00785763					YDL050C	YDL050C	36.5752	30.1501	1.21311	0.00231837					YKL220C	YKL220C	36.7841	30.5343	1.20468	-0.00678613
YCL045C	YCL045C	35.6256	29.3876	1.21227	-0.00797789					YDL174C	YDL174C	35.0098	28.8599	1.21309	0.00212461					YLR422W	YLR422W	37.2149	30.8926	1.20466	-0.00723205
YNL223W	YNL223W	33.8809	27.9485	1.21226	-0.00813104					YNL058C	YNL058C	35.4569	29.2286	1.21309	0.00203435					YHR105W	YHR105W	36.5476	30.339	1.20464	-0.00745417
YGR010W	YGR010W	31.3873	25.8916	1.21225	-0.00822318					YBR179C	YBR179C	35.2891	29.0903	1.21309	0.00194716					YHL021C	YHL021C	35.4163	29.4	1.20464	-0.00760212
YNR013C	YNR013C	33.3433	27.5052	1.21225	-0.00826828					YEL060C	YEL060C	35.5054	29.2688	1.21308	0.00182275					YLR221C	YLR221C	35.652	29.5959	1.20463	-0.00774342
YMR106C	YMR106C	34.6995	28.6244	1.21224	-0.00858603					YBR030W	YBR030W	35.5229	29.2834	1.21307	0.00173766					YNL283C	YNL283C	34.2111	28.3999	1.20462	-0.00792407
YKR053C	YKR053C	32.9474	27.1792	1.21223	-0.00869702					YJR061W	YJR061W	35.4665	29.2371	1.21306	0.0015273					YGL051W	YGL051W	35.7531	29.6807	1.20459	-0.00851033
YDL183C	YDL183C	34.3216	28.3129	1.21222	-0.00882019					YOR252W	YOR252W	36.4225	30.0256	1.21305	0.0012441					YNR014W	YNR014W	35.7555	29.6828	1.20459	-0.00854811
YPR156C	YPR156C	31.1077	25.6616	1.21222	-0.00882714					YGL257C	YGL257C	36.018	29.6925	1.21303	0.000937607					YGR077C	YGR077C	35.6153	29.567	1.20456	-0.00907146
YNL121C	YNL121C	32.8896	27.1319	1.21221	-0.00909835					YOR100C	YOR100C	36.1648	29.8144	1.213	0.000300158					YER011W	YER011W	37.7549	31.3433	1.20456	-0.00910254
YBR282W	YBR282W	35.9655	29.6696	1.2122	-0.00926534					YDR033W	YDR033W	36.6951	30.2516	1.213	0.000257024					YGL114W	YGL114W	36.3451	30.1729	1.20456	-0.00911295
YER144C	YER144C	33.7456	27.8383	1.2122	-0.0092904					YHR180W	YHR180W	34.821	28.7068	1.21299	0.000106836					YJL117W	YJL117W	35.4516	29.4315	1.20454	-0.00939638
YIR007W	YIR007W	32.4212	26.7458	1.2122	-0.00933642					YCL045C	YCL045C	37.4322	30.8598	1.21298	-0.000110522					YDL211C	YDL211C	37.0465	30.7557	1.20454	-0.00941977
YNL183C	YNL183C	34.1151	28.1433	1.2122	-0.00939287					YDR229W	YDR229W	36.7976	30.3367	1.21298	-0.000141354					YDR340W	YDR340W	36.9513	30.6773	1.20452	-0.00994825
YDR114C	YDR114C	31.6954	26.1471	1.21219	-0.00946949					YER032W	YER032W	37.7042	31.0844	1.21296	-0.000418994					YER185W	YER185W	36.581	30.3701	1.20451	-0.0101187
YDR226W	YDR226W	37.7641	31.1536	1.21219	-0.00950709					YBR016W	YBR016W	37.8017	31.165	1.21295	-0.000544242					YDR493W	YDR493W	34.5486	28.6829	1.2045	-0.0102414
YKL030W	YKL030W	32.7236	26.9956	1.21218	-0.00964532					YBR022W	YBR022W	35.3952	29.1812	1.21295	-0.000681767					YIL119C	YIL119C	36.0622	29.9396	1.2045	-0.0102921
YKR032W	YKR032W	33.9584	28.0143	1.21218	-0.00975077					YOL128C	YOL128C	35.5627	29.3194	1.21294	-0.000774586					YNL105W	YNL105W	35.8452	29.7597	1.20449	-0.0104976
YDL233W	YDL233W	33.1399	27.3394	1.21216	-0.0100115					YJL116C	YJL116C	34.9008	28.7739	1.21293	-0.000970528					YLR237W	YLR237W	35.4541	29.4351	1.20448	-0.0105709
YBL099W	YBL099W	31.4535	25.9484	1.21215	-0.010203					YJR134C	YJR134C	36.2261	29.867	1.21291	-0.00128179					YHR137W	YHR137W	35.6376	29.5874	1.20448	-0.0105837
YER187W	YER187W	34.1143	28.1435	1.21215	-0.0102102					YGL165C	YGL165C	35.1067	28.9441	1.21291	-0.00129516					YER095W	YER095W	37.4902	31.1257	1.20448	-0.0107363
YJR026W	YJR026W	33.1076	27.3139	1.21211	-0.010998					YBR054W	YBR054W	36.303	29.9309	1.21289	-0.00170565					YLR420W	YLR420W	35.7284	29.6631	1.20447	-0.0107707
YKR015C	YKR015C	33.9075	27.9745	1.21209	-0.0115547					YGR279C	YGR279C	35.4375	29.2179	1.21287	-0.00218138					YGR122C-A	YGR122C-A	35.509	29.4819	1.20443	-0.011585
YBR299W	YBR299W	33.8471	27.9248	1.21208	-0.0116343					YDR148C	YDR148C	35.7044	29.4381	1.21286	-0.00224878					YIL016W	YIL016W	35.2389	29.258	1.20442	-0.0117894
YHL037C	YHL037C	33.6374	27.7524	1.21206	-0.0121643					YHR073W	YHR073W	37.7675	31.1395	1.21285	-0.00248487					YDL229W	YDL229W	36.0876	29.9628	1.20441	-0.0119628
YPL265W	YPL265W	34.1861	28.2052	1.21205	-0.0123426					YKR105C	YKR105C	35.5369	29.3003	1.21285	-0.00250922					YGR224W	YGR224W	35.208	29.2329	1.2044	-0.0122644
YMR145C	YMR145C	34.2595	28.2658	1.21205	-0.0123528					YNL089C	YNL089C	36.3408	29.9632	1.21285	-0.00257013					YEL043W	YEL043W	35.7449	29.6788	1.20439	-0.0124138
YGL080W	YGL080W	32.746	27.0174	1.21204	-0.012571					YOL088C	YOL088C	36.0722	29.7425	1.21282	-0.00309868					YOR001W	YOR001W	37.6875	31.2922	1.20437	-0.0127071
YLR325C	YLR325C	33.0601	27.2766	1.21203	-0.0126333					YGR249W	YGR249W	37.7178	31.0993	1.21282	-0.00312342					YOR028C	YOR028C	36.7626	30.5244	1.20437	-0.0128381
YEL039C	YEL039C	34.2637	28.2697	1.21203	-0.0127206					YOR016C	YOR016C	37.2528	30.716	1.21282	-0.00316646					YOR328W	YOR328W	34.452	28.6059	1.20436	-0.0128885
YLR456W	YLR456W	33.7467	27.8432	1.21203	-0.0127235					YGR021W	YGR021W	35.9217	29.619	1.21279	-0.00364011					YJL038C	YJL038C	35.9332	29.8362	1.20435	-0.0131518
YER044C-A	YER044C-A	34.8668	28.7678	1.21201	-0.0131128					YHR129C	YHR129C	36.0012	29.6847	1.21278	-0.00376931					YNL276C	YNL276C	37.0753	30.7849	1.20433	-0.0134697
YBR099C	YBR099C	33.014	27.24	1.21197	-0.0138705					YOR311C	YOR311C	36.4561	30.0602	1.21277	-0.00398194					YNR056C	YNR056C	36.5187	30.3235	1.20431	-0.0140281
YGL209W	YGL209W	34.4706	28.4418	1.21197	-0.0139037					YLR231C	YLR231C	35.68	29.4203	1.21277	-0.00402458					YBL060W	YBL060W	36.3706	30.2007	1.2043	-0.0142386
YGR039W	YGR039W	33.1007	27.3117	1.21196	-0.0140388					YOL035C	YOL035C	33.6989	27.7873	1.21274	-0.00450683					YGR234W	YGR234W	36.3556	30.1885	1.20429	-0.0143756
YDR058C	YDR058C	32.2512	26.611	1.21195	-0.0142701					YPR164W	YPR164W	37.9714	31.3105	1.21274	-0.00465178					YOR269W	YOR269W	36.8322	30.5843	1.20428	-0.0144432
YLR174W	YLR174W	33.9225	27.9901	1.21195	-0.0143265					YCR071C	YCR071C	35.8267	29.5421	1.21274	-0.00467543					YDR438W	YDR438W	34.8471	28.936	1.20428	-0.0145487
YAL017W	YAL017W	33.6243	27.7441	1.21194	-0.014408					YIL089W	YIL089W	35.6757	29.4178	1.21272	-0.00489012					YPL064C	YPL064C	35.6162	29.5748	1.20428	-0.0145826
YPR191W	YPR191W	32.3261	26.6732	1.21193	-0.0146148					YIR017C	YIR017C	36.7689	30.3193	1.21272	-0.00490024					YLR028C	YLR028C	35.9961	29.8905	1.20426	-0.014842
YER011W	YER011W	34.5036	28.4699	1.21193	-0.0146306					YOL002C	YOL002C	36.0222	29.7037	1.21272	-0.00501919					YPR149W	YPR149W	36.3325	30.171	1.20422	-0.0157423
YOL011W	YOL011W	33.8084	27.8965	1.21192	-0.0148314					YOL126C	YOL126C	35.9261	29.6245	1.21271	-0.00506762					YIR021W	YIR021W	34.4403	28.5999	1.20421	-0.0158927
YLR443W	YLR443W	32.5921	26.893	1.21192	-0.0149454					YPL004C	YPL004C	37.3427	30.7929	1.21271	-0.0052121					YLR194C	YLR194C	36.8409	30.5934	1.20421	-0.0159199
YCL044C	YCL044C	32.4758	26.7977	1.21189	-0.0154568					YGR017W	YGR017W	35.6864	29.4271	1.2127	-0.00526716					YGR197C	YGR197C	36.7484	30.5167	1.20421	-0.0159432
YPL257W	YPL257W	34.278	28.2851	1.21188	-0.0157339					YBR012C	YBR012C	36.4607	30.0664	1.21267	-0.00583379					YOR137C	YOR137C	36.9361	30.6726	1.2042	-0.0160142
YGR136W	YGR136W	33.1904	27.3876	1.21187	-0.0157757					YLL063C	YLL063C	37.3519	30.8014	1.21267	-0.00594827					YHR017W	YHR017W	36.313	30.1554	1.20419	-0.0161956
YKL070W	YKL070W	35.223	29.065	1.21187	-0.0158335					YHR183W	YHR183W	36.4831	30.0851	1.21266	-0.00601219					YAR030C	YAR030C	36.603	30.3963	1.20419	-0.0162484
YJL059W	YJL059W	33.2477	27.435	1.21187	-0.0158522					YCL075W	YCL075W	36.0091	29.6945	1.21265	-0.00629426					YLR150W	YLR150W	35.6537	29.6087	1.20416	-0.0168197
YJR099W	YJR099W	34.0123	28.0661	1.21186	-0.0159492					YMR286W	YMR286W	36.0384	29.7188	1.21265	-0.006353					YLL013C	YLL013C	38.7609	32.1898	1.20414	-0.0173134
YHR025W	YHR025W	33.9005	27.9739	1.21186	-0.0159633					YFR035C	YFR035C	34.9076	28.7868	1.21262	-0.00680189					YHL016C	YHL016C	36.3992	30.2284	1.20414	-0.0173304
YEL005C	YEL005C	33.4817	27.6286	1.21185	-0.0162833					YOR093C	YOR093C	37.6917	31.0828	1.21262	-0.00684109					YOL035C	YOL035C	33.8916	28.1462	1.20413	-0.0174852
YDR193W	YDR193W	32.7469	27.0225	1.21184	-0.0164649					YER041W	YER041W	36.6011	30.1848	1.21257	-0.00782001					YNR013C	YNR013C	36.0936	29.9755	1.2041	-0.0179486
YFL010C	YFL010C	34.9369	28.8296	1.21184	-0.0164824					YJR153W	YJR153W	35.1414	28.9813	1.21256	-0.00804461					YOL124C	YOL124C	37.6706	31.2854	1.2041	-0.0181134
YDL057W	YDL057W	31.4928	25.9877	1.21184	-0.0165375					YLR431C	YLR431C	35.5626	29.3292	1.21253	-0.00848834					YGL083W	YGL083W	36.7797	30.5456	1.20409	-0.0181951
YMR097C	YMR097C	31.9504	26.3657	1.21182	-0.0169278					YGL060W	YGL060W	37.5062	30.9323	1.21252	-0.00867377					YGR025W	YGR025W	37.751	31.3523	1.20409	-0.0182421
YGL154C	YGL154C	34.332	28.3314	1.2118	-0.0172201					YKR066C	YKR066C	37.9999	31.3405	1.21248	-0.0094187					YGL059W	YGL059W	34.8767	28.9652	1.20409	-0.0182614
YEL010W	YEL010W	34.2518	28.2653	1.2118	-0.0172333					YKL046C	YKL046C	34.6304	28.5616	1.21248	-0.00945244					YOR158W	YOR158W	35.2753	29.2967	1.20407	-0.0185933
YBR083W	YBR083W	32.4703	26.7952	1.2118	-0.0173242					YDL002C	YDL002C	36.3894	30.0123	1.21248	-0.00945499					YGR001C	YGR001C	35.3821	29.3861	1.20404	-0.0191681
YGL173C	YGL173C	38.6242	31.8736	1.21179	-0.0174205					YOL119C	YOL119C	35.4609	29.2465	1.21248	-0.00946412					YPR193C	YPR193C	35.6102	29.5758	1.20403	-0.0193212
YKL208W	YKL208W	32.3658	26.71	1.21175	-0.0182936					YDR127W	YDR127W	35.751	29.4858	1.21248	-0.00951368					YMR272C	YMR272C	35.5434	29.5207	1.20402	-0.0196544
YHL021C	YHL021C	31.9774	26.3898	1.21173	-0.0185511					YCR007C	YCR007C	35.4585	29.2446	1.21248	-0.00956014					YPR050C	YPR050C	36.8961	30.6443	1.20401	-0.0197347
YIL160C	YIL160C	34.8673	28.7748	1.21173	-0.0186008					YKR060W	YKR060W	36.2334	29.8839	1.21247	-0.00967172					YFL026W	YFL026W	35.1728	29.2132	1.204	-0.0199144
YKR095W	YKR095W	34.1028	28.144	1.21173	-0.0187083					YNL183C	YNL183C	36.798	30.3497	1.21247	-0.00977301					YER067C-A	YER067C-A	35.9537	29.8627	1.20397	-0.0206415
YIL010W	YIL010W	33.5428	27.682	1.21172	-0.0188676					YCR092C	YCR092C	35.2322	29.06	1.21239	-0.0111353					YGL138C	YGL138C	34.8367	28.9352	1.20395	-0.0208993
YGR096W	YGR096W	33.1595	27.3658	1.21172	-0.0189114					YLL023C	YLL023C	36.4338	30.0515	1.21238	-0.0114205					YDL071C	YDL071C	34.2419	28.4415	1.20394	-0.0211575
YLR050C	YLR050C	34.0842	28.1292	1.2117	-0.0191605					YLR205C	YLR205C	36.3866	30.0127	1.21237	-0.0115219					YGR174C	YGR174C	35.3049	29.3245	1.20394	-0.0211713
YDR009W	YDR009W	32.971	27.2106	1.2117	-0.0193115					YPL033C	YPL033C	36.2732	29.9195	1.21236	-0.0117185					YNL266W	YNL266W	35.3074	29.3266	1.20394	-0.0211822
YOL059W	YOL059W	34.7588	28.6863	1.21169	-0.0195127					YNR042W	YNR042W	35.7143	29.4588	1.21235	-0.0120309					YGR044C	YGR044C	36.495	30.3131	1.20394	-0.0212246
YGR263C	YGR263C	34.0883	28.1331	1.21168	-0.0195917					YOR267C	YOR267C	36.0546	29.7395	1.21234	-0.0120674					YGR141W	YGR141W	35.7578	29.701	1.20392	-0.0214365
YDR217C	YDR217C	32.0705	26.4682	1.21166	-0.0199514					YML123C	YML123C	35.4378	29.2309	1.21234	-0.0121324					YDR279W	YDR279W	38.398	31.8941	1.20392	-0.0214981
[truncated: 2,719 more rows]

## Sheet: Actins_analysis
Stringent ACT1 PPIs	Stringent ACT1 GIs	C103_A	C104_A	Ratios	Z-score		Avg	Std_dev		name	name	C103_C	C104_C	Ratios	Z-score		Mean	Sd		name	name	C103_A1B	C104_A1B	Ratios	Z-score		Mean	Sd		ACT1 PPIs Stringent >2 reports of interaction and data available in SCMD		ACT1 GIs Stringent >2 reports of interaction and data measured in SCMD
YNL271C	YNL271C	29.4792	27.9649	1.05415	-3.1416		1.21267	0.050459		YJR152W	YJR152W	37.39	35.0988	1.06528	-2.79422		1.21298	0.0528608		YMR307W	YMR307W	34.5295	32.6866	1.05638	-2.88909		1.20503	0.051451		YNL271C		YNL271C
YJR152W	YJR152W	34.6757	32.7581	1.05854	-3.05457		<2SD	1.11175		YMR307W	YMR307W	35.4011	32.9126	1.07561	-2.59879					YJR152W	YJR152W	37.3202	35.2328	1.05925	-2.83339					YLR319C		YMR307W
YMR307W	YMR307W	32.205	30.1459	1.0683	-2.86104					YER149C	YER149C	34.0705	31.5833	1.07875	-2.53933		<2sd	1.10726		YNL271C	YNL271C	32.5503	30.4533	1.06886	-2.6466		<2sd	1.10213		YNL079C		YLR320W
YLR320W	YLR320W	31.2171	29.1818	1.06975	-2.83242					YKR055W	YKR055W	34.5484	32.0077	1.07938	-2.52745					YKR055W	YKR055W	34.6866	32.3554	1.07205	-2.58456					YDR129C		YKR055W
YKR055W	YKR055W	33.065	30.8508	1.07177	-2.79234		For PPIs			YGL038C	YGL038C	37.4169	34.6385	1.08021	-2.5117		For PPIs			YGL038C	YGL038C	36.2139	33.7255	1.07378	-2.55084		For PPIs			YDR388W		YLR370C
YLR370C	YLR370C	33.2669	30.9572	1.07461	-2.7361		k	3		YNL079C	YNL079C	32.8709	30.4186	1.08062	-2.50403		k	3		YLR320W	YLR320W	33.5461	31.1444	1.07712	-2.4861		k	3		YMR109W		YER149C
YER149C	YER149C	32.1085	29.7747	1.07838	-2.66132		s	22		YGR036C	YGR036C	37.5734	34.7239	1.08206	-2.47669		s	23		YLR370C	YLR370C	35.6152	33.063	1.07719	-2.48462		s	18		YOR367W		YLL021W
YLL021W	YLL021W	31.465	29.0918	1.08158	-2.59796		M	42		YLR320W	YLR320W	34.3316	31.5881	1.08685	-2.3861		M	42		YER149C	YER149C	33.8901	31.3939	1.07951	-2.43955		M	42		YFL013C		YKL007W
YGR036C	YGR036C	33.8067	31.1977	1.08363	-2.55737		N	4718		YNL271C	YNL271C	33.8905	31.1356	1.08848	-2.3553		N	4718		YGR036C	YGR036C	36.0829	33.4125	1.07992	-2.43158		N	4718		YMR092C		YIL034C
YKL007W	YKL007W	32.2042	29.6949	1.0845	-2.54		expected	0.19		YAL035W	YAL035W	37.781	34.6178	1.09137	-2.30056		expected	0.204		YKL007W	YKL007W	35.2866	32.4373	1.08784	-2.27763		expected	0.16		YEL018W		YLR319C
YGL038C	YGL038C	34.7018	31.9964	1.08455	-2.53905		enrichment	15.32x		YGR020C	YGR020C	38.5863	35.203	1.09611	-2.21095		enrichment	14.65x		YAL035W	YAL035W	37.5141	34.3626	1.09171	-2.20237		enrichment	18.72x		YLR399C		YNL079C
YIL034C	YIL034C	29.757	27.2342	1.09263	-2.37886		p-value	0.00089		YLR370C	YLR370C	39.2839	35.8391	1.09612	-2.21075		p-value	0.001		YLL021W	YLL021W	33.8921	31.0386	1.09194	-2.19804		p-value	0.000487		YLR093C		YOR085W
YBR112C	YBR112C	45.8502	41.9486	1.09301	-2.37148					YKL007W	YKL007W	35.0765	31.9919	1.09642	-2.20513					YKL119C	YKL119C	38.6608	35.3638	1.09323	-2.17288					YGR080W		YDR162C
YAL035W	YAL035W	36.0945	32.9949	1.09394	-2.35301					YLL021W	YLL021W	33.5419	30.5815	1.0968	-2.19783		For GIs			YEL036C	YEL036C	48.3445	44.1417	1.09521	-2.1344		For GIs			YDL178W		YLR056W
YGL223C	YGL223C	32.6676	29.8425	1.09467	-2.33857		For GIs			YLR319C	YLR319C	34.5737	31.4862	1.09806	-2.17404		k	12		YLR319C	YLR319C	34.8123	31.7392	1.09682	-2.10302		k	11		YLR429W		YOR035C
YAL053W	YAL053W	31.3552	28.6244	1.0954	-2.32404		k	11		YDR245W	YDR245W	45.6756	41.5514	1.09925	-2.15146		s	23		YOR085W	YOR085W	33.0428	30.0656	1.09902	-2.0603		s	18		YAL029C		YDR129C
YLR319C	YLR319C	32.9402	29.9406	1.10019	-2.22922		s	22		YDR162C	YDR162C	34.634	31.405	1.10282	-2.08406		M	484		YNL079C	YNL079C	32.9142	29.9155	1.10024	-2.03662		M	484		YCR088W		YOL004W
YPL045W	YPL045W	34.5718	31.4132	1.10055	-2.22195		M	484		YEL036C	YEL036C	49.2294	44.5906	1.10403	-2.0611		N	4718		YGL105W	YGL105W	37.1926	33.7563	1.1018	-2.00642		N	4718		YDR359C		YDR245W
YNL079C	YNL079C	30.5202	27.6912	1.10216	-2.1901		N	4718		YPL045W	YPL045W	38.0024	34.421	1.10405	-2.06079		expected	2.359		YDR162C	YDR162C	34.533	31.3323	1.10215	-1.99946		expected	1.84		YDL002C		YOR327C
YDL198C	YDL198C	32.8491	29.7762	1.1032	-2.16952		expected	2.25		YKL118W	YKL118W	39.2783	35.5701	1.10425	-2.05693		enrichment	5.09x		YAL053W	YAL053W	34.8543	31.567	1.10414	-1.96094		enrichment	5.96x		YBR105C		YBR095C
YKL119C	YKL119C	35.6019	32.2302	1.10461	-2.14147		enrichment	4.88x		YGL105W	YGL105W	36.8857	33.3543	1.10588	-2.02618		p-value	5.589e-07		YDR245W	YDR245W	45.9528	41.6067	1.10446	-1.9547		p-value	1.935e-07		YIL138C		YCR009C
YDL192W	YDL192W	34.2028	30.9472	1.1052	-2.12993		p-value	2.861e-06		YBR266C	YBR266C	35.0189	31.6407	1.10677	-2.00936					YJL188C	YJL188C	32.9643	29.8398	1.10471	-1.94982					YCR059C		YDR443C
YOR085W	YOR085W	29.2935	26.3491	1.11174	-2.00013					YAL053W	YAL053W	35.1994	31.8034	1.10678	-2.00908					YKL118W	YKL118W	39.4348	35.6906	1.10491	-1.94595					YPL240C		YDL006W
YER014W	YER014W	36.899	33.1745	1.11227	-1.98974			PPIs		YLR056W	YLR056W	35.1117	31.6831	1.10822	-1.98194					YER014W	YER014W	38.5088	34.846	1.10511	-1.94191					YJR082C		YDR349C
YGR020C	YGR020C	36.2272	32.5638	1.1125	-1.98522			Gis		YLR396C	YLR396C	35.4236	31.955	1.10854	-1.97572					YPL045W	YPL045W	37.3554	33.7568	1.1066	-1.91296					YNL136W		YAL013W
YNL133C	YNL133C	42.8356	38.4534	1.11396	-1.95626					YJL188C	YJL188C	33.4629	30.1757	1.10894	-1.96831					YER044C	YER044C	37.5505	33.8938	1.10789	-1.88801					YDR334W		YGR229C
YER044C	YER044C	33.4929	30.0579	1.11428	-1.94992					YKL119C	YKL119C	38.6466	34.8279	1.10964	-1.95492					YGR020C	YGR020C	38.5014	34.751	1.10792	-1.88736					YBR200W		YDR116C
YDR162C	YDR162C	32.9087	29.5273	1.11452	-1.94519					YDR432W	YDR432W	36.4087	32.7982	1.11008	-1.9466					YBR097W	YBR097W	35.1076	31.6874	1.10793	-1.88709					YNR031C		YAL024C
YFR016C	YFR016C	32.7441	29.3755	1.11468	-1.94204					YLR447C	YLR447C	41.0496	36.9765	1.11015	-1.9453					YBR266C	YBR266C	34.8955	31.491	1.10811	-1.88367					YDR485C		YNL153C
YLR056W	YLR056W	32.2975	28.9719	1.11479	-1.93987					YOR085W	YOR085W	33.9761	30.5728	1.11132	-1.92326					YIL034C	YIL034C	31.3113	28.2378	1.10885	-1.8694					YOL012C		YGR105W
YKL118W	YKL118W	36.1752	32.4096	1.11619	-1.91206					YER014W	YER014W	39.1754	35.2473	1.11144	-1.92088					YJL189W	YJL189W	33.9184	30.5636	1.10976	-1.85152					YOR189W		YDR388W
YGL084C	YGL084C	33.5815	30.0769	1.11652	-1.9055					YNL025C	YNL025C	35.0541	31.519	1.11216	-1.90735					YBR095C	YBR095C	34.5693	31.1279	1.11056	-1.83615					YBR231C		YDL077C
YIL052C	YIL052C	28.9608	25.9299	1.11689	-1.89826					YJL189W	YJL189W	34.522	31.0367	1.1123	-1.90473					YAL024C	YAL024C	35.7393	32.166	1.11109	-1.82578					YML041C		YIL084C
YOR035C	YOR035C	38.7824	34.7063	1.11745	-1.88711					YIL034C	YIL034C	30.8038	27.6668	1.11338	-1.88415					YMR231W	YMR231W	34.3906	30.9263	1.11202	-1.80776					YDL160C		YLL043W
YMR231W	YMR231W	31.9693	28.5954	1.11799	-1.87639					YBR127C	YBR127C	38.6214	34.6264	1.11538	-1.84648					YFR016C	YFR016C	34.4322	30.9633	1.11203	-1.80746					YNL215W		YPL213W
YLR396C	YLR396C	31.7084	28.3601	1.11806	-1.87495					YAL024C	YAL024C	36.076	32.317	1.11632	-1.8287					YDR432W	YDR432W	36.208	32.5504	1.11237	-1.80095					YAL011W		YPL181W
YBR097W	YBR097W	32.8495	29.3769	1.11821	-1.87207					YPR044C	YPR044C	35.0806	31.4129	1.11676	-1.82035					YDR129C	YDR129C	36.158	32.4925	1.11281	-1.79237					YNL107W		YLR087C
YDR129C	YDR129C	35.0858	31.3762	1.11823	-1.87165					YNL133C	YNL133C	44.5746	39.8833	1.11763	-1.80391					YHR004C	YHR004C	35.0164	31.4544	1.11325	-1.78388					YNL138W		YEL027W
YOL004W	YOL004W	31.8458	28.4722	1.11849	-1.86654					YLR242C	YLR242C	37.1428	33.2331	1.11764	-1.8036					YLR056W	YLR056W	34.6662	31.1267	1.11371	-1.77481					YPL129W		YBR101C
YDR495C	YDR495C	34.7733	31.0774	1.11892	-1.85787					YIL052C	YIL052C	31.0259	27.7519	1.11797	-1.79739					YGL084C	YGL084C	35.1448	31.5247	1.11483	-1.75299					YOR141C		YMR109W
YMR263W	YMR263W	32.7477	29.2302	1.12034	-1.82989					YOR331C	YOR331C	37.6764	33.682	1.11859	-1.78566					YDL232W	YDL232W	33.7378	30.2561	1.11508	-1.7483					YEL044W		YDR393W
YKL054C	YKL054C	44.5772	39.7878	1.12037	-1.82913					YER044C	YER044C	37.6773	33.6806	1.11866	-1.78427					YOR008C	YOR008C	35.1023	31.457	1.11588	-1.73267					YNL059C		YPL145C
YDR245W	YDR245W	41.7073	37.2263	1.12037	-1.82913					YDR523C	YDR523C	40.0892	35.7998	1.11982	-1.76246					YER031C	YER031C	35.4593	31.7585	1.11653	-1.72004							YLR342W
YJL188C	YJL188C	30.9332	27.5991	1.12081	-1.82058					YMR143W	YMR143W	39.6908	35.4415	1.1199	-1.76094					YOR327C	YOR327C	35.3939	31.6759	1.11737	-1.70365							YKL127W
YMR238W	YMR238W	30.9418	27.5979	1.12117	-1.81343					YIR026C	YIR026C	34.4264	30.7237	1.12052	-1.74922					YDL185W	YDL185W	37.4348	33.4993	1.11748	-1.70157							YDR414C
YOR327C	YOR327C	32.7642	29.203	1.12195	-1.79796					YPL059W	YPL059W	38.293	34.1674	1.12075	-1.74487					YPL059W	YPL059W	38.4041	34.364	1.11757	-1.69986							YDR335W
YDR523C	YDR523C	37.5406	33.4473	1.12238	-1.78934					YBR112C	YBR112C	51.3526	45.8062	1.12109	-1.73847					YEL042W	YEL042W	37.2426	33.3165	1.11784	-1.6945							YLR412W
YOL072W	YOL072W	34.1718	30.4362	1.12273	-1.78235					YLR061W	YLR061W	33.4451	29.8271	1.1213	-1.73445					YOR035C	YOR035C	41.0952	36.7611	1.1179	-1.6934							YLR110C
YER031C	YER031C	32.8901	29.2826	1.12319	-1.77324					YGL206C	YGL206C	50.5028	45.0395	1.1213	-1.73441					YMR263W	YMR263W	35.675	31.9121	1.11792	-1.69308							YIR003W
YBR095C	YBR095C	31.6945	28.2161	1.12328	-1.77156					YMR231W	YMR231W	34.4772	30.7474	1.1213	-1.73433					YLR242C	YLR242C	36.7129	32.8379	1.118	-1.6914							YGL168W
YEL036C	YEL036C	41.8357	37.2411	1.12337	-1.76966					YBR097W	YBR097W	36.1934	32.2758	1.12138	-1.73291					YLR396C	YLR396C	35.2344	31.5154	1.11801	-1.69132							YGR166W
YOL076W	YOL076W	34.6758	30.8608	1.12362	-1.76476					YER031C	YER031C	34.8375	31.0552	1.12179	-1.72515					YDL075W	YDL075W	34.9541	31.2641	1.11803	-1.69094							YBR015C
YHR026W	YHR026W	35.1923	31.2909	1.12468	-1.7438					YOR008C	YOR008C	35.3893	31.54	1.12205	-1.72031					YPR044C	YPR044C	35.3842	31.6358	1.11849	-1.68203							YER151C
YNL025C	YNL025C	32.7672	29.1334	1.12473	-1.74279					YOL143C	YOL143C	38.8309	34.6025	1.1222	-1.71743					YKL080W	YKL080W	38.7963	34.6777	1.11877	-1.67654							YKL212W
YLR148W	YLR148W	33.2459	29.556	1.12484	-1.74056					YDL075W	YDL075W	34.964	31.1522	1.12236	-1.71436					YDR523C	YDR523C	40.2035	35.9165	1.11936	-1.66505							YDR484W
YCR009C	YCR009C	34.0813	30.2906	1.12515	-1.73455					YGL084C	YGL084C	35.6228	31.7342	1.12254	-1.71102					YDL198C	YDL198C	34.6942	30.9819	1.11982	-1.65604							YDR372C
YDR443C	YDR443C	32.0811	28.4841	1.12628	-1.71212					YLR148W	YLR148W	35.3501	31.4857	1.12274	-1.70726					YMR238W	YMR238W	33.4084	29.8267	1.12008	-1.65095							YPR024W
YDL232W	YDL232W	31.1535	27.6461	1.12687	-1.70045					YLL043W	YLL043W	36.1004	32.1167	1.12404	-1.68263					YOR211C	YOR211C	35.729	31.8949	1.12021	-1.64846							YOR106W
YOR008C	YOR008C	33.1915	29.4443	1.12726	-1.69259					YOL064C	YOL064C	35.6213	31.6719	1.1247	-1.67015					YDL006W	YDL006W	32.2575	28.7854	1.12062	-1.64051							YPL139C
YDL006W	YDL006W	30.3185	26.8674	1.12845	-1.66908					YMR136W	YMR136W	34.9341	31.06	1.12473	-1.66952					YOR331C	YOR331C	37.04	33.0405	1.12105	-1.63222							YOR002W
YDR432W	YDR432W	34.0758	30.1963	1.12848	-1.66851					YDL119C	YDL119C	36.2666	32.2428	1.1248	-1.66823					YOL004W	YOL004W	32.5356	29.0167	1.12127	-1.6279							YAL002W
YGL105W	YGL105W	32.8522	29.0991	1.12898	-1.65867					YDL232W	YDL232W	33.8897	30.1276	1.12487	-1.66681					YLR447C	YLR447C	40.2925	35.931	1.12139	-1.62562							YGL203C
YGL206C	YGL206C	46.0888	40.8196	1.12908	-1.65649					YMR238W	YMR238W	33.9227	30.1444	1.12534	-1.65797					YHR026W	YHR026W	38.1206	33.9929	1.12143	-1.62485							YOL008W
YJL189W	YJL189W	30.246	26.7659	1.13002	-1.63795					YBR095C	YBR095C	35.1465	31.2242	1.12562	-1.65273					YCR009C	YCR009C	36.2326	32.2933	1.12199	-1.61397							YDR108W
YDR349C	YDR349C	31.374	27.7617	1.13012	-1.63607					YMR263W	YMR263W	35.5299	31.5586	1.12584	-1.64854					YLR148W	YLR148W	35.759	31.858	1.12245	-1.60499							YNL080C
YKL080W	YKL080W	35.6102	31.5052	1.1303	-1.6325					YML073C	YML073C	34.2026	30.3757	1.12599	-1.64578					YLR061W	YLR061W	34.0254	30.3118	1.12251	-1.60378							YLR170C
YML097C	YML097C	34.3481	30.3596	1.13138	-1.61107					YGL246C	YGL246C	33.0444	29.3188	1.12707	-1.62518					YIR026C	YIR026C	34.2923	30.5219	1.12353	-1.58397							YOL108C
YGR223C	YGR223C	36.3835	32.148	1.13175	-1.60369					YDR395W	YDR395W	34.7974	30.8496	1.12797	-1.60829					YMR136W	YMR136W	34.4407	30.6368	1.12416	-1.57171							YOR094W
YBR266C	YBR266C	30.9699	27.361	1.1319	-1.60072					YOR327C	YOR327C	36.727	32.5582	1.12804	-1.60688					YML073C	YML073C	34.4804	30.6476	1.12506	-1.55425							YFR031C-A
YIR026C	YIR026C	31.2024	27.5552	1.13236	-1.59156					YCR009C	YCR009C	35.9181	31.8167	1.12891	-1.59051					YIL052C	YIL052C	30.8508	27.4134	1.12539	-1.54783							YLR360W
YMR136W	YMR136W	33.5395	29.6178	1.13241	-1.59058					YGR272C	YGR272C	37.6521	33.3496	1.12901	-1.58856					YDR459C	YDR459C	33.8806	30.0866	1.1261	-1.53395							YML016C
YHR004C	YHR004C	32.7675	28.9153	1.13323	-1.57443					YDL006W	YDL006W	32.6443	28.9133	1.12904	-1.588					YGL206C	YGL206C	50.5383	44.8737	1.12624	-1.53141							YBL007C
YAL013W	YAL013W	32.3412	28.535	1.13339	-1.57126					YKL080W	YKL080W	40.0288	35.4513	1.12912	-1.58647					YNL025C	YNL025C	35.3297	31.3598	1.12659	-1.52446							YBL027W
YHL020C	YHL020C	31.6367	27.9083	1.13359	-1.56712					YPR124W	YPR124W	37.5016	33.2086	1.12927	-1.58357					YBR127C	YBR127C	38.4531	34.1245	1.12685	-1.51948							YML073C
YGR229C	YGR229C	32.3446	28.5271	1.13382	-1.56271					YHR026W	YHR026W	37.0345	32.7696	1.13015	-1.567					YDR349C	YDR349C	34.0005	30.1636	1.1272	-1.51259							YDR450W
YDR116C	YDR116C	33.3291	29.3579	1.13527	-1.534					YGL067W	YGL067W	34.958	30.9319	1.13016	-1.56676					YGL223C	YGL223C	35.1927	31.1985	1.12803	-1.4966							YGL005C
YNL097C	YNL097C	32.939	29.0015	1.13577	-1.52405					YEL042W	YEL042W	37.2317	32.9433	1.13018	-1.56651					YGL168W	YGL168W	37.6177	33.335	1.12848	-1.48786							YPR179C
YOR211C	YOR211C	33.5997	29.5813	1.13584	-1.52256					YML024W	YML024W	38.3839	33.9613	1.13022	-1.5656					YGL067W	YGL067W	34.4275	30.4993	1.1288	-1.48162							YOR014W
YPL059W	YPL059W	34.4196	30.3001	1.13596	-1.52026					YLR350W	YLR350W	35.6246	31.5158	1.13037	-1.56277					YDR495C	YDR495C	38.6634	34.2423	1.12911	-1.47548							YLR039C
YAL024C	YAL024C	33.0173	29.0623	1.13609	-1.51769					YDR414C	YDR414C	42.3636	37.4663	1.13071	-1.55636					YBL089W	YBL089W	37.2126	32.9434	1.12959	-1.46616							YJR075W
YDR459C	YDR459C	30.1591	26.5438	1.1362	-1.51546					YOR211C	YOR211C	36.0103	31.8421	1.1309	-1.55278					YPL234C	YPL234C	36.3453	32.1628	1.13004	-1.4574							YML063W
YNL153C	YNL153C	36.5142	32.0833	1.13811	-1.4777					YFR016C	YFR016C	34.5128	30.5016	1.13151	-1.54131					YDR443C	YDR443C	34.3915	30.4234	1.13043	-1.44989							YIR023W
YGR105W	YGR105W	35.3883	31.0932	1.13814	-1.47709					YOL076W	YOL076W	37.021	32.7159	1.13159	-1.53971					YML024W	YML024W	38.1664	33.7415	1.13114	-1.43609							YDR137W
YDL075W	YDL075W	31.9029	28.0202	1.13857	-1.46853					YDR129C	YDR129C	37.2341	32.9036	1.13161	-1.53934					YOL076W	YOL076W	36.1489	31.95	1.13142	-1.43059							YDR128W
YCL007C	YCL007C	34.7397	30.5113	1.13859	-1.4682					YOR035C	YOR035C	43.3383	38.2914	1.1318	-1.53576					YDL192W	YDL192W	36.5784	32.3188	1.1318	-1.42328							YPR060C
YDR323C	YDR323C	32.0322	28.1327	1.13861	-1.46766					YLR342W	YLR342W	34.8534	30.7928	1.13187	-1.53449					YGR160W	YGR160W	36.7979	32.5123	1.13182	-1.42295							YLR107W
YER083C	YER083C	34.4888	30.2764	1.13913	-1.45739					YDR393W	YDR393W	36.8391	32.5427	1.13202	-1.53155					YOL064C	YOL064C	36.9093	32.6059	1.13198	-1.41973							YMR039C
YDR388W	YDR388W	34.3006	30.1082	1.13925	-1.45512					YDR459C	YDR459C	32.7469	28.9202	1.13232	-1.52594					YDR025W	YDR025W	37.4531	33.0857	1.132	-1.4193							YBR162C
YDL077C	YDL077C	32.057	28.1364	1.13934	-1.45316					YDL185W	YDL185W	37.675	33.2718	1.13234	-1.52557					YOL008W	YOL008W	36.0846	31.8701	1.13224	-1.41466							YER122C
YEL042W	YEL042W	33.2926	29.1955	1.14033	-1.43358					YOL008W	YOL008W	36.9174	32.5717	1.13342	-1.50517					YFL025C	YFL025C	34.7279	30.6654	1.13248	-1.41007							YOL081W
YPL152W	YPL152W	35.2722	30.9225	1.14066	-1.42705					YIL084C	YIL084C	34.2157	30.1859	1.1335	-1.50362					YML097C	YML097C	37.5149	33.1233	1.13258	-1.408							YOL087C
YPR131C	YPR131C	33.0283	28.9318	1.14159	-1.4086					YML097C	YML097C	37.0195	32.6313	1.13448	-1.48514					YGR223C	YGR223C	38.4461	33.9143	1.13362	-1.38779							YDR320C
YLR080W	YLR080W	34.7721	30.4519	1.14187	-1.40312					YHR004C	YHR004C	34.8428	30.7101	1.13457	-1.48339					YEL027W	YEL027W	38.1475	33.6474	1.13374	-1.38552							YDR276C
YFL025C	YFL025C	32.4937	28.4526	1.14203	-1.39998					YGL167C	YGL167C	39.4187	34.7374	1.13476	-1.47975					YPL152W	YPL152W	36.5177	32.2077	1.13382	-1.38402							YDR399W
YPL061W	YPL061W	33.4529	29.2851	1.14232	-1.39423					YLR287C-A	YLR287C-A	40.3529	35.5587	1.13483	-1.47853					YNL133C	YNL133C	45.862	40.4487	1.13383	-1.38379							YJR032W
YIL084C	YIL084C	32.4546	28.3942	1.143	-1.38072					YDR443C	YDR443C	34.6346	30.5195	1.13484	-1.47835					YNL097C	YNL097C	34.7171	30.6111	1.13413	-1.37787							YKR020W
YLL043W	YLL043W	32.1824	28.1525	1.14315	-1.37781					YPL152W	YPL152W	37.2575	32.8199	1.13521	-1.4712					YCR044C	YCR044C	34.8669	30.7344	1.13446	-1.3716							YBR131W
YPL213W	YPL213W	33.4255	29.2348	1.14335	-1.37385					YOR078W	YOR078W	37.2354	32.7971	1.13532	-1.4691					YDR414C	YDR414C	41.4901	36.5724	1.13447	-1.37142							YPL056C
YGL167C	YGL167C	35.3311	30.9005	1.14338	-1.37317					YDR349C	YDR349C	34.3656	30.257	1.13579	-1.46031					YGL167C	YGL167C	38.8456	34.2367	1.13462	-1.36843							YMR092C
YLR240W	YLR240W	32.1516	28.1189	1.14341	-1.3725					YAL013W	YAL013W	34.0095	29.9399	1.13593	-1.45771					YLR338W	YLR338W	37.0473	32.6458	1.13483	-1.3644							YEL018W
YBL089W	YBL089W	35.6918	31.2147	1.14343	-1.37223					YOL004W	YOL004W	32.6738	28.7519	1.13641	-1.44864					YGL246C	YGL246C	33.2557	29.2991	1.13504	-1.36028							YER019W
YLR386W	YLR386W	36.6797	32.0755	1.14354	-1.37					YGL168W	YGL168W	38.5859	33.9437	1.13676	-1.44191					YLL043W	YLL043W	35.3259	31.112	1.13544	-1.35246							YNL021W
YBR127C	YBR127C	34.6807	30.3249	1.14364	-1.36806					YOL072W	YOL072W	39.52	34.7505	1.13725	-1.43265					YAL013W	YAL013W	34.6979	30.5563	1.13554	-1.35059							YAL058W
YCR084C	YCR084C	34.0161	29.7393	1.14381	-1.36473					YPL213W	YPL213W	35.9983	31.6504	1.13737	-1.43034					YEL029C	YEL029C	36.1596	31.8392	1.13569	-1.34758							YPR017C
YPL181W	YPL181W	32.9853	28.8299	1.14414	-1.35822					YDL198C	YDL198C	35.467	31.1813	1.13744	-1.42899					YIR003W	YIR003W	35.1486	30.9472	1.13576	-1.34633							YDR289C
YLR338W	YLR338W	34.258	29.9321	1.14453	-1.35048					YEL027W	YEL027W	39.0066	34.2879	1.13762	-1.42568					YLR240W	YLR240W	35.1189	30.91	1.13617	-1.33836							YNL297C
YGL067W	YGL067W	32.149	28.0693	1.14535	-1.33421					YML063W	YML063W	37.3038	32.7819	1.13794	-1.41964					YBR112C	YBR112C	50.9279	44.8152	1.1364	-1.3339							YOR070C
YLR061W	YLR061W	30.1399	26.3122	1.14547	-1.33173					YGL058W	YGL058W	39.4235	34.6416	1.13804	-1.41775					YGL012W	YGL012W	35.0956	30.8816	1.13646	-1.33271							YDR153C
YLR087C	YLR087C	34.6073	30.2104	1.14554	-1.33031					YBL089W	YBL089W	37.4112	32.8417	1.13914	-1.39697					YOR312C	YOR312C	34.8521	30.6606	1.13671	-1.3279							YJL187C
YDR025W	YDR025W	35.2685	30.7858	1.14561	-1.32899					YCL007C	YCL007C	38.1509	33.4908	1.13915	-1.3968					YPR131C	YPR131C	36.0454	31.7095	1.13674	-1.32728							YLR119W
YDR290W	YDR290W	33.8957	29.5836	1.14576	-1.32599					YOR067C	YOR067C	35.6616	31.2984	1.13941	-1.39188					YKR094C	YKR094C	34.9605	30.7487	1.13697	-1.32272							YMR123W
YNL278W	YNL278W	32.4749	28.3344	1.14613	-1.3187					YDL192W	YDL192W	36.8659	32.3544	1.13944	-1.39123					YCR031C	YCR031C	37.6727	33.1284	1.13717	-1.31885							YER092W
YLR242C	YLR242C	34.1367	29.7812	1.14625	-1.31635					YPL097W	YPL097W	36.9135	32.3939	1.13952	-1.38974					YER083C	YER083C	37.483	32.9594	1.13725	-1.31735							YJR074W
YEL027W	YEL027W	33.7816	29.4646	1.14652	-1.31106					YLR185W	YLR185W	34.0887	29.9095	1.13973	-1.38583					YLR068W	YLR068W	37.584	33.0325	1.13779	-1.30686							YJL053W
YNL084C	YNL084C	34.1754	29.8065	1.14657	-1.30989					YKR094C	YKR094C	34.6062	30.3606	1.13984	-1.38369					YPL271W	YPL271W	34.3621	30.1928	1.13809	-1.30104							YGL020C
YGL246C	YGL246C	30.148	26.2825	1.14708	-1.29994					YIR003W	YIR003W	34.5582	30.3167	1.13991	-1.38242					YDR140W	YDR140W	34.3639	30.1931	1.13814	-1.30011							YBR121C
YOR331C	YOR331C	34.1623	29.7803	1.14715	-1.29853					YDR495C	YDR495C	38.7354	33.9776	1.14003	-1.38015					YDR388W	YDR388W	36.843	32.3689	1.13822	-1.2984							YDR378C
YOL143C	YOL143C	34.982	30.4936	1.14719	-1.2976					YOR096W	YOR096W	36.4482	31.9561	1.14057	-1.36987					YDR395W	YDR395W	35.937	31.5697	1.13834	-1.29616							YBR145W
YLR447C	YLR447C	37.1302	32.354	1.14762	-1.28912					YOR330C	YOR330C	35.871	31.443	1.14083	-1.36503					YBR015C	YBR015C	37.542	32.9641	1.13888	-1.28571							YNL051W
YPR044C	YPR044C	32.941	28.6991	1.14781	-1.28546					YDR140W	YDR140W	34.5086	30.2454	1.14095	-1.36263					YLR404W	YLR404W	36.2516	31.8306	1.13889	-1.28541							YLR074C
YBR101C	YBR101C	33.7137	29.369	1.14794	-1.28289					YPL061W	YPL061W	35.2893	30.9217	1.14125	-1.35704					YMR143W	YMR143W	39.8006	34.9335	1.13932	-1.27701							YLR373C
YPL042C	YPL042C	29.1462	25.3802	1.14838	-1.27411					YDR290W	YDR290W	36.6103	32.0691	1.14161	-1.35023					YOR355W	YOR355W	34.2985	30.0904	1.13985	-1.26686							YKL010C
YOL064C	YOL064C	33.4449	29.1143	1.14875	-1.26681					YPR036W	YPR036W	35.9654	31.4989	1.1418	-1.34663					YPL213W	YPL213W	36.3136	31.8581	1.13985	-1.26673							YMR124W
YMR109W	YMR109W	33.6463	29.2857	1.1489	-1.26378					YDL077C	YDL077C	33.8094	29.5943	1.14243	-1.3347					YDR290W	YDR290W	36.7483	32.2261	1.14033	-1.25749							YPL154C
YAL026C	YAL026C	31.7001	27.5863	1.14912	-1.25936					YGR160W	YGR160W	35.9821	31.4797	1.14303	-1.32339					YML063W	YML063W	37.2658	32.6786	1.14037	-1.25662							YML052W
YDR393W	YDR393W	34.4292	29.9571	1.14929	-1.25615					YNR052C	YNR052C	39.6275	34.6602	1.14331	-1.31796					YDR080W	YDR080W	34.8043	30.5069	1.14087	-1.24704							YPL068C
YDL076C	YDL076C	35.8053	31.1542	1.14929	-1.256					YJR139C	YJR139C	34.5601	30.227	1.14335	-1.31726					YIL084C	YIL084C	33.9473	29.7542	1.14093	-1.24587							YDR207C
YLR111W	YLR111W	32.4438	28.2026	1.15038	-1.23441					YKL197C	YKL197C	39.7867	34.7881	1.14369	-1.31092					YLR350W	YLR350W	35.6834	31.2752	1.14095	-1.24541							YLR414C
YPL145C	YPL145C	31.9065	27.7346	1.15042	-1.23365					YGL223C	YGL223C	35.8124	31.3123	1.14372	-1.31037					YDR393W	YDR393W	37.4513	32.8228	1.14102	-1.24412							YIL095W
YLR342W	YLR342W	32.4025	28.1578	1.15075	-1.22719					YCR047C	YCR047C	36.978	32.3299	1.14377	-1.30935					YGR272C	YGR272C	37.6163	32.9635	1.14115	-1.2415							YNR006W
YPL120W	YPL120W	34.5293	29.9942	1.1512	-1.2182					YML026C	YML026C	37.1132	32.4252	1.14458	-1.29403					YCR047C	YCR047C	36.9036	32.3382	1.14118	-1.24099							YGR178C
YLR404W	YLR404W	34.2734	29.7702	1.15126	-1.21693					YCR028C-A	YCR028C-A	37.4419	32.7094	1.14468	-1.29209					YMR230W	YMR230W	37.2359	32.6213	1.14146	-1.23556							YGR080W
YKL127W	YKL127W	32.7884	28.4756	1.15145	-1.21316					YJR075W	YJR075W	38.3327	33.4857	1.14475	-1.29084					YDL119C	YDL119C	36.8097	32.2424	1.14165	-1.23172							YKL160W
YCR028C	YCR028C	32.1568	27.9133	1.15202	-1.20187					YNL097C	YNL097C	35.0201	30.5905	1.1448	-1.2898					YKL054C	YKL054C	47.117	41.2689	1.14171	-1.23069							YKR057W
YOR332W	YOR332W	33.9122	29.4353	1.15209	-1.20052					YDR388W	YDR388W	36.078	31.5094	1.14499	-1.28619					YGR229C	YGR229C	37.2474	32.6195	1.14187	-1.22746							YPL179W
YNL305C	YNL305C	35.2033	30.5329	1.15296	-1.18327					YNL003C	YNL003C	34.65	30.2559	1.14523	-1.28174					YDR116C	YDR116C	34.0388	29.8087	1.14191	-1.22682							YEL051W
YML024W	YML024W	35.4654	30.7576	1.15306	-1.18135					YLR240W	YLR240W	35.2078	30.7295	1.14573	-1.27219					YPL061W	YPL061W	35.9424	31.4731	1.14201	-1.2249							YDL203C
YDR375C	YDR375C	32.7594	28.4048	1.15331	-1.17644					YJL062W	YJL062W	36.7084	32.0281	1.14613	-1.26467					YKL127W	YKL127W	37.5068	32.8263	1.14258	-1.21367							YER162C
YKR027W	YKR027W	33.6468	29.1667	1.1536	-1.17056					YFL025C	YFL025C	34.8696	30.4225	1.14618	-1.26376					YPL097W	YPL097W	36.2455	31.7194	1.14269	-1.21157							YKL041W
YDR414C	YDR414C	37.8527	32.8108	1.15367	-1.16931					YPL120W	YPL120W	36.7543	32.0594	1.14644	-1.25875					YDL077C	YDL077C	34.1946	29.9238	1.14272	-1.21094							YNL238W
YDR335W	YDR335W	38.2848	33.1849	1.15368	-1.16905					YDR025W	YDR025W	38.4542	33.5414	1.14647	-1.25827					YGL058W	YGL058W	39.4017	34.4775	1.14282	-1.209							YMR126C
YDL185W	YDL185W	35.4395	30.7114	1.15395	-1.1637					YLR080W	YLR080W	37.6423	32.8249	1.14676	-1.25274					YDR375C	YDR375C	35.3372	30.9186	1.14291	-1.2073							YPR075C
YML081W	YML081W	33.5007	29.0177	1.15449	-1.15298					YLR412W	YLR412W	37.0369	32.2959	1.1468	-1.25204					YKR057W	YKR057W	36.9694	32.3359	1.14329	-1.19986							YDL065C
YLR412W	YLR412W	34.3894	29.7866	1.15452	-1.15232					YMR319C	YMR319C	37.0228	32.2724	1.1472	-1.24451					YOL095C	YOL095C	33.7793	29.5439	1.14336	-1.19855							YPL051W
YEL029C	YEL029C	33.3927	28.9187	1.15471	-1.14866					YHL020C	YHL020C	34.2984	29.8904	1.14747	-1.23933					YOR182C	YOR182C	40.6653	35.5643	1.14343	-1.1972							YPL198W
YLR110C	YLR110C	33.0653	28.6304	1.1549	-1.14486					YPL271W	YPL271W	34.8756	30.3918	1.14753	-1.23812					YPL120W	YPL120W	37.32	32.6356	1.14354	-1.1951							YOR132W
YIR003W	YIR003W	31.5379	27.2967	1.15538	-1.13545					YNL238W	YNL238W	35.9841	31.3497	1.14783	-1.2325					YNL197C	YNL197C	29.9781	26.2134	1.14362	-1.19352							YBR171W
YAL058C-A	YAL058C-A	31.2679	27.0584	1.15557	-1.13155					YMR242C	YMR242C	33.274	28.9791	1.14821	-1.22541					YFR001W	YFR001W	33.3597	29.1636	1.14388	-1.18843							YLR398C
YGL168W	YGL168W	34.8014	30.1151	1.15561	-1.13073					YNL197C	YNL197C	29.6404	25.8094	1.14843	-1.2211					YPL042C	YPL042C	31.3512	27.4044	1.14402	-1.18571							YAL010C
YOL098C	YOL098C	35.443	30.6698	1.15563	-1.13039					YKL143W	YKL143W	37.9986	33.0841	1.14854	-1.21902					YOR330C	YOR330C	35.714	31.207	1.14442	-1.17788							YGR027C
YLR435W	YLR435W	34.0198	29.4329	1.15584	-1.12618					YGR223C	YGR223C	38.5417	33.5535	1.14866	-1.21677					YKL053C-A	YKL053C-A	33.0463	28.8757	1.14443	-1.17773							YPR013C
YLR287C-A	YLR287C-A	37.5381	32.4748	1.15591	-1.12477					YPL042C	YPL042C	30.7826	26.7851	1.14924	-1.20579					YMR242C	YMR242C	33.2457	29.0395	1.14484	-1.16973							YCL008C
YDR204W	YDR204W	36.96	31.9635	1.15632	-1.11671					YAL002W	YAL002W	35.8491	31.19	1.14938	-1.20323					YHL020C	YHL020C	33.9615	29.6633	1.1449	-1.16865							YJR014W
YKL053C-A	YKL053C-A	30.7384	26.5823	1.15635	-1.11618					YBR015C	YBR015C	36.833	32.0417	1.14953	-1.20035					YCR028C	YCR028C	35.5858	31.0819	1.1449	-1.16861							YOR322C
YMR230W	YMR230W	34.4063	29.7455	1.15669	-1.10946					YCR044C	YCR044C	34.7791	30.2533	1.14959	-1.19916					YER086W	YER086W	34.4461	30.0856	1.14494	-1.1679							YPR153W
YKL175W	YKL175W	35.6645	30.8241	1.15703	-1.10262					YER083C	YER083C	38.4265	33.422	1.14974	-1.19643					YIR032C	YIR032C	36.5533	31.9238	1.14501	-1.16642							YKL016C
YGR064W	YGR064W	32.411	28.0115	1.15706	-1.10207					YGR105W	YGR105W	38.0839	33.1199	1.14988	-1.19371					YDL062W	YDL062W	33.6877	29.4158	1.14523	-1.16229							YDR072C
YGR166W	YGR166W	32.7352	28.288	1.15721	-1.09903					YMR015C	YMR015C	35.3574	30.7453	1.15001	-1.1913					YLR110C	YLR110C	37.8913	33.0836	1.14532	-1.16047							YBR078W
YGR167W	YGR167W	33.2368	28.7206	1.15725	-1.09835					YDR156W	YDR156W	37.2035	32.3444	1.15023	-1.18711					YLR111W	YLR111W	35.7375	31.1856	1.14596	-1.14805							YOL009C
YGL012W	YGL012W	33.3032	28.7779	1.15725	-1.0983					YGL135W	YGL135W	35.0281	30.4466	1.15048	-1.18246					YNL003C	YNL003C	34.8403	30.3995	1.14608	-1.14566							YHR081W
YMR034C	YMR034C	35.7079	30.8541	1.15731	-1.09703					YEL054C	YEL054C	34.488	29.9717	1.15069	-1.17851					YKL197C	YKL197C	39.8083	34.734	1.14609	-1.14549							YLR089C
YDR410C	YDR410C	34.5894	29.8845	1.15744	-1.09461					YIL154C	YIL154C	37.4379	32.5304	1.15086	-1.17518					YDL076C	YDL076C	37.8836	33.0509	1.14622	-1.14301							YDR050C
YGR228W	YGR228W	34.1502	29.5039	1.15748	-1.0937					YJR145C	YJR145C	36.9653	32.1189	1.15089	-1.17461					YDR163W	YDR163W	35.0532	30.581	1.14624	-1.14255							YOR349W
YDR395W	YDR395W	31.913	27.571	1.15749	-1.09364					YPL145C	YPL145C	33.9586	29.5063	1.15089	-1.17458					YNL153C	YNL153C	38.9345	33.9652	1.14631	-1.14129							YEL024W
YDR080W	YDR080W	32.7199	28.2617	1.15775	-1.08843					YOR312C	YOR312C	34.5206	29.9923	1.15098	-1.17291					YOR067C	YOR067C	35.6621	31.0991	1.14672	-1.1332							YGR221C
YOR330C	YOR330C	32.4809	28.0502	1.15796	-1.08427					YER086W	YER086W	34.2717	29.7733	1.15109	-1.17089					YKL143W	YKL143W	37.7872	32.9477	1.14688	-1.13009							YGL200C
YKL197C	YKL197C	35.1198	30.327	1.15804	-1.08275					YLR107W	YLR107W	37.3319	32.4222	1.15143	-1.16442					YKL092C	YKL092C	34.258	29.8654	1.14708	-1.12632							YOL111C
YER111C	YER111C	42.1128	36.3626	1.15813	-1.0808					YDR375C	YDR375C	35.8872	31.1639	1.15156	-1.16192					YNL227C	YNL227C	34.2206	29.8198	1.14758	-1.11657							YML101C
YIL154C	YIL154C	35.6681	30.7933	1.15831	-1.07734					YCR084C	YCR084C	35.9048	31.1716	1.15184	-1.15661					YOR096W	YOR096W	35.478	30.9142	1.14763	-1.11562							YDR477W
YDR163W	YDR163W	34.1427	29.471	1.15852	-1.07324					YOR182C	YOR182C	40.296	34.9806	1.15195	-1.15451					YPL239W	YPL239W	36.8647	32.119	1.14775	-1.11319							YDR326C
YKL126W	YKL126W	45.2068	39.0155	1.15869	-1.06979					YKL054C	YKL054C	46.8588	40.6731	1.15208	-1.15209					YML081W	YML081W	36.7185	31.99	1.14781	-1.11205							YPL057C
YGL027C	YGL027C	32.8808	28.3767	1.15873	-1.06904					YDL032W	YDL032W	34.0655	29.5686	1.15208	-1.15205					YGR105W	YGR105W	37.9588	33.0663	1.14796	-1.10911							YDR371W
YMR274C	YMR274C	33.3241	28.7546	1.15891	-1.06536					YKL081W	YKL081W	35.0749	30.4377	1.15235	-1.14699					YNL015W	YNL015W	36.5688	31.8514	1.14811	-1.10634							YPL149W
YIR032C	YIR032C	33.859	29.2079	1.15924	-1.05889					YLR068W	YLR068W	36.9678	32.0799	1.15237	-1.14673					YCL050C	YCL050C	38.5501	33.5658	1.14849	-1.0988							YGR163W
YBR025C	YBR025C	35.044	30.2272	1.15935	-1.05662					YPL234C	YPL234C	36.7384	31.8779	1.15247	-1.14474					YOR002W	YOR002W	36.1741	31.4933	1.14863	-1.09616							YDR063W
YOL095C	YOL095C	31.6921	27.3344	1.15942	-1.05526					YCR031C	YCR031C	37.7486	32.7494	1.15265	-1.14131					YOL143C	YOL143C	39.0361	33.9837	1.14867	-1.09537							YLR079W
YBR015C	YBR015C	33.8355	29.178	1.15963	-1.05124					YML003W	YML003W	34.3409	29.7861	1.15292	-1.13629					YLR080W	YLR080W	37.3272	32.4945	1.14872	-1.0943							YDR183W
YCR044C	YCR044C	32.3396	27.8878	1.15963	-1.05108					YOR002W	YOR002W	36.3461	31.516	1.15326	-1.12985					YGR016W	YGR016W	36.4366	31.7148	1.14888	-1.0912							YNL236W
YER151C	YER151C	37.0472	31.9415	1.15985	-1.04688					YAL021C	YAL021C	42.5104	36.8589	1.15333	-1.12854					YER098W	YER098W	37.4593	32.6047	1.14889	-1.09105							YKR054C
YAL009W	YAL009W	31.4237	27.0916	1.15991	-1.04569					YGR167W	YGR167W	35.4403	30.7268	1.1534	-1.12718					YKL081W	YKL081W	35.2551	30.6855	1.14892	-1.09057							YMR073C
YMR030W	YMR030W	34.0359	29.3379	1.16013	-1.04118					YOR026W	YOR026W	35.5301	30.7978	1.15366	-1.12228					YDR323C	YDR323C	35.6987	31.0713	1.14893	-1.09032							YDR440W
YMR199W	YMR199W	34.424	29.6695	1.16025	-1.0389					YML089C	YML089C	34.6286	30.0163	1.15366	-1.1222					YGL135W	YGL135W	35.5111	30.8993	1.14925	-1.08407							YLR354C
YKL212W	YKL212W	31.5284	27.1681	1.16049	-1.03404					YFL013C	YFL013C	37.0687	32.122	1.154	-1.11588					YPR106W	YPR106W	35.7177	31.0789	1.14926	-1.0839							YDR310C
YOL056W	YOL056W	35.2402	30.3625	1.16065	-1.03091					YDR116C	YDR116C	34.0697	29.5201	1.15412	-1.11354					YPL145C	YPL145C	34.4362	29.9616	1.14934	-1.08227							YGR279C
YOR355W	YOR355W	31.9991	27.5688	1.1607	-1.02994					YNL015W	YNL015W	36.3381	31.4795	1.15434	-1.10937					YGR273C	YGR273C	36.5554	31.8006	1.14952	-1.07887							YHR151C
YER098W	YER098W	34.6116	29.8028	1.16135	-1.01703					YOL056W	YOL056W	37.6833	32.6413	1.15447	-1.10698					YIL154C	YIL154C	38.6145	33.5911	1.14954	-1.07837							YER071C
YOR312C	YOR312C	32.2294	27.7493	1.16145	-1.01506					YPL168W	YPL168W	38.3608	33.2276	1.15449	-1.10663					YLR435W	YLR435W	35.9387	31.2597	1.14968	-1.07569							YKL002W
YDR484W	YDR484W	31.4929	27.1141	1.1615	-1.01413					YPL139C	YPL139C	33.2711	28.8181	1.15452	-1.10591					YNL096C	YNL096C	39.1749	34.0729	1.14974	-1.07463							YBL051C
YMR187C	YMR187C	34.8168	29.9714	1.16167	-1.01071					YDR410C	YDR410C	38.7229	33.5384	1.15458	-1.10477					YDL135C	YDL135C	34.4383	29.9517	1.14979	-1.07356							YBR166C
YBR206W	YBR206W	34.0877	29.3424	1.16172	-1.0097					YDL061C	YDL061C	37.0888	32.1212	1.15465	-1.10351					YLR412W	YLR412W	37.5109	32.6181	1.15	-1.06951							YLR292C
YNL327W	YNL327W	31.4698	27.0798	1.16211	-1.00197					YNL153C	YNL153C	38.1301	33.0224	1.15467	-1.10307					YGR167W	YGR167W	35.5851	30.9431	1.15002	-1.0692							YMR267W
YCR047C	YCR047C	35.309	30.3819	1.16217	-1.00081					YNL080C	YNL080C	36.625	31.7189	1.15468	-1.10304					YCL007C	YCL007C	38.0257	33.0653	1.15002	-1.06918							YOR208W
YDL032W	YDL032W	31.4876	27.0927	1.16222	-0.999851					YLR404W	YLR404W	37.0678	32.0948	1.15495	-1.09784					YLR168C	YLR168C	36.6264	31.8447	1.15016	-1.06648							YGR078C
YDL119C	YDL119C	34.0692	29.3125	1.16228	-0.998697					YGL203C	YGL203C	34.4864	29.8521	1.15524	-1.09236					YLR087C	YLR087C	37.3405	32.4599	1.15036	-1.06259							YMR074C
YFR001W	YFR001W	30.1938	25.9714	1.16258	-0.992706					YDR450W	YDR450W	36.6359	31.7039	1.15557	-1.0862					YJR075W	YJR075W	38.3927	33.3693	1.15054	-1.05906							YPR045C
YDR372C	YDR372C	33.9958	29.2405	1.16263	-0.991761					YLR289W	YLR289W	36.6626	31.7262	1.15559	-1.08566					YNL238W	YNL238W	35.1573	30.557	1.15055	-1.05886							YGL049C
YGL162W	YGL162W	34.3743	29.5644	1.16269	-0.99051					YNL227C	YNL227C	34.0996	29.5071	1.15564	-1.08477					YML016C	YML016C	36.4012	31.6373	1.15058	-1.05826							YER161C
YMR143W	YMR143W	36.2383	31.1671	1.16271	-0.990125					YEL029C	YEL029C	36.8617	31.8971	1.15564	-1.08473					YLR386W	YLR386W	38.8857	33.7896	1.15082	-1.05361							YKR007W
YCR031C	YCR031C	34.5523	29.7164	1.16273	-0.989636					YKL053C-A	YKL053C-A	33.5656	29.0375	1.15594	-1.07912					YCR084C	YCR084C	36.2796	31.5158	1.15115	-1.04708							YLR356W
YPR024W	YPR024W	35.2043	30.277	1.16274	-0.989524					YPL181W	YPL181W	35.0228	30.2925	1.15615	-1.07508					YBR191W	YBR191W	35.4968	30.8345	1.1512	-1.04614							YOL061W
YGR160W	YGR160W	34.3517	29.5397	1.1629	-0.986395					YKL127W	YKL127W	37.0211	32.0132	1.15643	-1.06978					YOL056W	YOL056W	37.5192	32.5913	1.1512	-1.04611							YJR131W
YPL271W	YPL271W	32.4549	27.9068	1.16298	-0.98481					YBR025C	YBR025C	37.2124	32.1767	1.1565	-1.06851					YMR052C-A	YMR052C-A	37.6642	32.7063	1.15159	-1.03864							YLR429W
YOR036W	YOR036W	33.1583	28.511	1.163	-0.984321					YBR191W	YBR191W	35.1223	30.3622	1.15678	-1.06322					YLR287C-A	YLR287C-A	39.7372	34.505	1.15164	-1.03769							YPL161C
YOR106W	YOR106W	32.238	27.7164	1.16314	-0.981593					YFR001W	YFR001W	32.8046	28.3502	1.15712	-1.05674					YLR185W	YLR185W	34.5194	29.9715	1.15174	-1.03567							YKL098W
YDR418W	YDR418W	31.6168	27.1817	1.16317	-0.981037					YLR435W	YLR435W	36.1622	31.2409	1.15753	-1.04907					YER063W	YER063W	35.7055	30.9974	1.15189	-1.03283							YNL141W
YPR106W	YPR106W	33.1908	28.5342	1.16319	-0.98051					YNL226W	YNL226W	33.2706	28.7423	1.15755	-1.04867					YMR030W	YMR030W	36.1611	31.3919	1.15192	-1.03211							YGL242C
YDR155C	YDR155C	34.9466	30.0432	1.16321	-0.980154					YDR199W	YDR199W	35.0815	30.3048	1.15762	-1.04731					YMR034C	YMR034C	38.2012	33.1623	1.15195	-1.03165							YBR267W
YNL015W	YNL015W	34.8794	29.9839	1.16327	-0.978997					YKL043W	YKL043W	34.7337	30.004	1.15763	-1.04707					YBR101C	YBR101C	35.893	31.1554	1.15206	-1.0294							YCR004C
YPL139C	YPL139C	30.8289	26.4986	1.16342	-0.976052					YMR282C	YMR282C	35.6542	30.7982	1.15767	-1.04633					YOR078W	YOR078W	37.6962	32.7205	1.15207	-1.02935							YGL213C
YDR447C	YDR447C	35.1561	30.2147	1.16354	-0.97358					YFL027C	YFL027C	38.4686	33.226	1.15778	-1.04422					YOR315W	YOR315W	35.197	30.5396	1.1525	-1.02086							YIR002C
YOR306C	YOR306C	32.9485	28.3156	1.16362	-0.972163					YLR048W	YLR048W	36.7454	31.7348	1.15789	-1.04221					YPR036W	YPR036W	36.0946	31.3165	1.15257	-1.0195							YJR119C
YOR002W	YOR002W	33.4542	28.7479	1.16371	-0.970274					YML081W	YML081W	37.2763	32.1921	1.15793	-1.04141					YBR048W	YBR048W	38.3605	33.2784	1.15271	-1.01676							YCR088W
YBR191W	YBR191W	31.8206	27.342	1.1638	-0.968541					YOL131W	YOL131W	34.8867	30.1284	1.15793	-1.0414					YPL181W	YPL181W	35.5565	30.8414	1.15288	-1.01352							YDR351W
YFL034W	YFL034W	36.9303	31.7325	1.1638	-0.968486					YNL305C	YNL305C	37.3075	32.2183	1.15796	-1.04088					YDR298C	YDR298C	35.611	30.8837	1.15307	-1.00988							YLL042C
YAL002W	YAL002W	33.2797	28.5874	1.16414	-0.961787					YKL044W	YKL044W	34.6917	29.9592	1.15797	-1.0408					YPL168W	YPL168W	38.307	33.2214	1.15308	-1.0096							YGL014W
YDR382W	YDR382W	30.2676	25.9996	1.16416	-0.961408					YGR166W	YGR166W	35.1659	30.3682	1.15798	-1.04043					YOL072W	YOL072W	38.9844	33.8049	1.15322	-1.00698							YBR179C
YDL033C	YDL033C	30.0314	25.7908	1.16442	-0.956143					YDL076C	YDL076C	38.0732	32.8768	1.15806	-1.03909					YAL009W	YAL009W	33.006	28.6176	1.15335	-1.00447							YDR150W
YLR068W	YLR068W	34.2654	29.4246	1.16452	-0.954324					YCL050C	YCL050C	38.0485	32.8544	1.15809	-1.03837					YPL139C	YPL139C	32.9415	28.5614	1.15336	-1.00431							YBR255W
YBR129C	YBR129C	35.7414	30.6918	1.16453	-0.954096					YPR106W	YPR106W	36.0816	31.1522	1.15824	-1.03565					YDL033C	YDL033C	32.6732	28.3288	1.15336	-1.00429							YPL184C
YOL106W	YOL106W	33.5612	28.8193	1.16454	-0.953829					YPR047W	YPR047W	38.335	33.0915	1.15846	-1.03152					YPR099C	YPR099C	35.6535	30.9094	1.15348	-1.0018							YJR084W
YMR170C	YMR170C	34.5103	29.6312	1.16466	-0.951492					YML050W	YML050W	36.4392	31.4503	1.15863	-1.02826					YGR166W	YGR166W	35.5544	30.8214	1.15356	-1.00028							YDL176W
YKR094C	YKR094C	32.2776	27.7137	1.16468	-0.951074					YJL148W	YJL148W	35.4139	30.5626	1.15873	-1.02624					YDR447C	YDR447C	37.8839	32.8384	1.15365	-0.998641							YGR284C
YDR295C	YDR295C	34.5563	29.6689	1.16473	-0.950056					YLR250W	YLR250W	36.6303	31.6098	1.15883	-1.0245					YMR274C	YMR274C	35.5396	30.8	1.15388	-0.994067							YBR218C
YER086W	YER086W	33.3099	28.5916	1.16502	-0.944235					YGR016W	YGR016W	36.7885	31.7439	1.15892	-1.02281					YAL026C	YAL026C	33.7094	29.2117	1.15397	-0.992348							YDR315C
YDR456W	YDR456W	33.2155	28.5071	1.16516	-0.941454					YJR048W	YJR048W	40.5995	35.0306	1.15897	-1.02175					YLR341W	YLR341W	34.9701	30.2928	1.1544	-0.98393							YKL137W
YLR350W	YLR350W	33.2467	28.5335	1.16518	-0.941142					YLR184W	YLR184W	32.9035	28.38	1.15939	-1.01387					YKL185W	YKL185W	34.048	29.4911	1.15452	-0.981719							YPR097W
YNL197C	YNL197C	27.3458	23.4689	1.16519	-0.94089					YDR272W	YDR272W	37.2482	32.1213	1.15961	-1.00969					YAL002W	YAL002W	36.1342	31.2768	1.1553	-0.966428							YBR108W
YGL203C	YGL203C	32.0275	27.4817	1.16541	-0.936554					YPL166W	YPL166W	37.0512	31.9511	1.15962	-1.00942					YML026C	YML026C	37.2758	32.2622	1.1554	-0.964533							YHR061C
YML057W	YML057W	34.7163	29.7884	1.16543	-0.936157					YKR057W	YKR057W	36.2954	31.2898	1.15997	-1.00282					YJR139C	YJR139C	34.2247	29.6209	1.15542	-0.964128							YOR269W
YLR269C	YLR269C	34.8312	29.885	1.16551	-0.934664					YPR146C	YPR146C	38.6045	33.2716	1.16028	-0.99693					YDR410C	YDR410C	37.4688	32.4282	1.15544	-0.963818							YOR113W
YDR435C	YDR435C	36.5435	31.3526	1.16557	-0.933517					YGL012W	YGL012W	35.1599	30.3024	1.1603	-0.996576					YBR129C	YBR129C	38.9836	33.7352	1.15557	-0.961161							YKL213C
YDL240W	YDL240W	32.5407	27.9162	1.16566	-0.931678					YMR052W	YMR052W	37.0753	31.9531	1.16031	-0.996525					YOR094W	YOR094W	37.8695	32.7546	1.15616	-0.949802							YGR129W
YDR518W	YDR518W	32.3872	27.7814	1.16579	-0.929112					YPR099C	YPR099C	36.0916	31.1039	1.16036	-0.995566					YKL050C	YKL050C	37.8548	32.7411	1.15619	-0.949289							YNL330C
YOL008W	YOL008W	31.8171	27.2861	1.16605	-0.923884					YLR388W	YLR388W	37.3949	32.2179	1.16069	-0.989301					YNL228W	YNL228W	35.252	30.4849	1.15638	-0.945554							YLL039C
YNL127W	YNL127W	36.5768	31.3636	1.16622	-0.920591					YBR235W	YBR235W	36.8843	31.7779	1.16069	-0.989216					YGL162W	YGL162W	37.3194	32.2701	1.15647	-0.943765							YNL005C
YDR417C	YDR417C	29.8597	25.6029	1.16626	-0.919712					YPL239W	YPL239W	35.9863	31.0037	1.16071	-0.988882					YCR028C-A	YCR028C-A	36.6077	31.6487	1.15669	-0.939536							YLR295C
YBR165W	YBR165W	36.1605	31.0044	1.1663	-0.918912					YNL228W	YNL228W	34.5472	29.7589	1.1609	-0.985216					YOR106W	YOR106W	34.4659	29.7966	1.15671	-0.939188							YDR322W
YKR090W	YKR090W	34.1433	29.2738	1.16634	-0.918099					YBR171W	YBR171W	38.7897	33.4133	1.16091	-0.985134					YLR184W	YLR184W	33.1505	28.6561	1.15684	-0.936581							YDR178W
YDR157W	YDR157W	35.6044	30.5201	1.16659	-0.913231					YBR276C	YBR276C	35.7705	30.8094	1.16103	-0.982903					YNL084C	YNL084C	37.1566	32.118	1.15688	-0.935867							YDR359C
YJR139C	YJR139C	31.3118	26.8399	1.16661	-0.912755					YOR332W	YOR332W	36.3565	31.3108	1.16115	-0.980614					YPR024W	YPR024W	37.6505	32.5421	1.15698	-0.933877							YLR190W
YGR272C	YGR272C	35.8013	30.6842	1.16677	-0.909697					YDL033C	YDL033C	32.3693	27.8766	1.16117	-0.980239					YLL016W	YLL016W	37.3247	32.2554	1.15716	-0.930325							YJL121C
YKL092C	YKL092C	32.1372	27.542	1.16684	-0.908237					YDR419W	YDR419W	36.5571	31.4799	1.16128	-0.978039					YFL034W	YFL034W	38.3253	33.1152	1.15733	-0.926981							YHR008C
YDR108W	YDR108W	34.0057	29.1429	1.16686	-0.907871					YOL062C	YOL062C	36.6063	31.52	1.16137	-0.976423					YMR282C	YMR282C	36.5812	31.6068	1.15738	-0.926044							YAR050W
YLR344W	YLR344W	33.2401	28.4853	1.16692	-0.906677					YML057W	YML057W	37.4068	32.2036	1.16157	-0.972566					YDR335W	YDR335W	41.2305	35.6224	1.15743	-0.925062							YCR090C
YGL058W	YGL058W	35.634	30.5338	1.16704	-0.90437					YFR031C-A	YFR031C-A	37.9791	32.6936	1.16167	-0.97075					YER151C	YER151C	39.9698	34.5329	1.15744	-0.924891							YBR238C
YBL024W	YBL024W	37.0797	31.7718	1.16706	-0.903826					YOL095C	YOL095C	33.5164	28.8497	1.16176	-0.969016					YNL305C	YNL305C	38.1751	32.9813	1.15747	-0.924232							YHR178W
YGL095C	YGL095C	32.0135	27.4307	1.16707	-0.903729					YBR101C	YBR101C	36.5512	31.458	1.1619	-0.966307					YML110C	YML110C	35.1638	30.3778	1.15755	-0.922808							YBR057C
YER101C	YER101C	35.4087	30.3334	1.16732	-0.898766					YGR178C	YGR178C	35.7742	30.7878	1.16196	-0.965193					YPR124W	YPR124W	37.3787	32.2863	1.15773	-0.919294							YML124C
YOR067C	YOR067C	32.0284	27.4359	1.16739	-0.897348					YMR017W	YMR017W	36.8638	31.7254	1.16197	-0.965108					YBR036C	YBR036C	34.9596	30.1964	1.15774	-0.919073							YKL117W
YNL080C	YNL080C	34.8607	29.8606	1.16745	-0.896153					YPR052C	YPR052C	34.5026	29.6922	1.16201	-0.96427					YGR220C	YGR220C	37.9542	32.7829	1.15774	-0.919048							YLR330W
YDR017C	YDR017C	36.6539	31.3955	1.16749	-0.8954					YBR035C	YBR035C	37.3786	32.1671	1.16202	-0.96417					YJL062W	YJL062W	37.3665	32.2753	1.15774	-0.919016							YPL036W
YKL056C	YKL056C	35.8722	30.7221	1.16764	-0.892494					YER122C	YER122C	34.8292	29.9698	1.16214	-0.961765					YLR269C	YLR269C	38.0284	32.8467	1.15776	-0.918783							YBL087C
YLL055W	YLL055W	37.8419	32.4083	1.16766	-0.892026					YFL028C	YFL028C	39.0897	33.6343	1.1622	-0.960705					YNL080C	YNL080C	36.7022	31.7004	1.15778	-0.918258							YNL022C
YDR199W	YDR199W	33.6186	28.7894	1.16774	-0.890379					YOR139C	YOR139C	36.1521	31.1057	1.16223	-0.960067					YDL061C	YDL061C	36.9787	31.938	1.15783	-0.917365							YGL029W
YLR169W	YLR169W	35.4055	30.3193	1.16775	-0.890176					YDR080W	YDR080W	35.2099	30.2944	1.16226	-0.959597					YDR417C	YDR417C	31.7269	27.3992	1.15795	-0.914977							YDR217C
YKL037W	YKL037W	30.7515	26.3332	1.16778	-0.889564					YDR382W	YDR382W	32.9143	28.3144	1.16246	-0.955814					YER111C	YER111C	43.9756	37.9766	1.15797	-0.914708							YIL160C
YLR170C	YLR170C	37.8397	32.3996	1.16791	-0.887145					YMR074C	YMR074C	34.3533	29.5508	1.16252	-0.954686					YOL047C	YOL047C	38.0894	32.8923	1.15801	-0.913926							YGL173C
YPL234C	YPL234C	33.8014	28.9414	1.16792	-0.886785					YPR131C	YPR131C	36.0057	30.9709	1.16256	-0.953815					YLR388W	YLR388W	37.0193	31.9673	1.15804	-0.913339							YBR083W
YMR118C	YMR118C	35.6276	30.5051	1.16793	-0.886752					YPL173W	YPL173W	36.26	31.1838	1.16279	-0.949604					YOL138C	YOL138C	36.8068	31.7832	1.15806	-0.912904							YMR097C
YLR185W	YLR185W	32.1297	27.5099	1.16793	-0.886561					YER063W	YER063W	36.1372	31.0775	1.16281	-0.949136					YML033W	YML033W	37.6247	32.4892	1.15807	-0.91272							YOR365C
YOL108C	YOL108C	35.0987	30.0518	1.16794	-0.886495					YGL162W	YGL162W	37.4936	32.2392	1.16298	-0.945915					YMR029C	YMR029C	34.8638	30.1034	1.15813	-0.911426							YNR051C
YLR015W	YLR015W	38.1642	32.6756	1.16797	-0.885839					YIR032C	YIR032C	35.8662	30.8364	1.16311	-0.943454					YBR165W	YBR165W	38.538	33.2725	1.15826	-0.909058							YDR127W
YMR042W	YMR042W	34.8098	29.8017	1.16805	-0.884354					YCL010C	YCL010C	35.6681	30.666	1.16312	-0.943314					YFL013C	YFL013C	37.0491	31.9816	1.15845	-0.905296							YMR064W
YPR008W	YPR008W	34.674	29.685	1.16806	-0.884025					YBR267W	YBR267W	36.6036	31.466	1.16327	-0.94035					YLR058C	YLR058C	36.8382	31.7995	1.15845	-0.90523							YDR329C
YOR026W	YOR026W	34.3663	29.4183	1.16819	-0.881406					YOL108C	YOL108C	37.4203	32.1671	1.16331	-0.93973					YDR230W	YDR230W	36.1149	31.1706	1.15862	-0.901983							YGL153W
YOR345C	YOR345C	33.3369	28.5342	1.16831	-0.879073					YMR052C-A	YMR052C-A	36.5262	31.3974	1.16335	-0.938899					YBR025C	YBR025C	37.5371	32.3977	1.15863	-0.901729							YPL002C
YOR094W	YOR094W	34.0755	29.1664	1.16831	-0.879065					YPR024W	YPR024W	37.8846	32.5639	1.16339	-0.938123					YMR187C	YMR187C	37.2688	32.1651	1.15867	-0.900978							YLR063W
YFR031C-A	YFR031C-A	35.109	30.0469	1.16847	-0.875905					YPR159W	YPR159W	42.1215	36.2053	1.16341	-0.937881					YER122C	YER122C	34.5254	29.7908	1.15893	-0.896031							YML055W
YLR385C	YLR385C	35.1226	30.0578	1.1685	-0.875285					YPL140C	YPL140C	38.0605	32.7092	1.16361	-0.934101					YBL027W	YBL027W	35.2594	30.4216	1.15903	-0.89409							YER117W
YOR188W	YOR188W	33.1303	28.3524	1.16852	-0.875039					YKR027W	YKR027W	36.714	31.5517	1.16362	-0.933879					YJR145C	YJR145C	37.2741	32.1598	1.15903	-0.894075							YGL081W
YBR249C	YBR249C	35.0049	29.9555	1.16856	-0.874118					YKL167C	YKL167C	37.1312	31.9098	1.16363	-0.933674					YIR023W	YIR023W	39.5508	34.1208	1.15914	-0.891896							YPR020W
YLR177W	YLR177W	36.8821	31.5616	1.16857	-0.873891					YCR022C	YCR022C	36.9168	31.725	1.16365	-0.933209					YOL118C	YOL118C	36.7798	31.7286	1.1592	-0.890696							YDR389W
YLR360W	YLR360W	34.5472	29.5619	1.16864	-0.872604					YMR230W	YMR230W	36.5499	31.408	1.16371	-0.93208					YKL043W	YKL043W	34.7538	29.9795	1.15925	-0.889668							YOR195W
YMR242C	YMR242C	30.9211	26.4544	1.16885	-0.868489					YNL127W	YNL127W	37.1245	31.8968	1.16389	-0.928633					YLR264W	YLR264W	37.2335	32.11	1.15956	-0.883634							YDR126W
YBR036C	YBR036C	31.6512	27.0769	1.16894	-0.866707					YNL096C	YNL096C	39.3049	33.7698	1.16391	-0.9284					YPR047W	YPR047W	38.3392	33.0617	1.15963	-0.882419							YGL043W
YOL047C	YOL047C	34.7558	29.7315	1.16899	-0.865675					YLR168C	YLR168C	38.5651	33.1332	1.16394	-0.927724					YDR450W	YDR450W	37.0942	31.986	1.1597	-0.880914							YDR244W
YCL033C	YCL033C	36.4322	31.1655	1.16899	-0.865637					YDR418W	YDR418W	33.287	28.5982	1.16396	-0.927441					YAL018C	YAL018C	35.5723	30.671	1.1598	-0.878984							YPL183C
YMR158W-A	YMR158W-A	34.5587	29.5625	1.169	-0.865408					YPR070W	YPR070W	34.7167	29.8255	1.16399	-0.926765					YDR231C	YDR231C	36.4277	31.4078	1.15983	-0.878468							YHR114W
YML087C	YML087C	34.5238	29.5319	1.16904	-0.864754					YHR066W	YHR066W	35.2526	30.2834	1.16409	-0.924923					YHR066W	YHR066W	35.5151	30.6187	1.15992	-0.876775							YJL124C
YEL054C	YEL054C	32.1154	27.4712	1.16906	-0.864346					YER111C	YER111C	44.9817	38.6385	1.16417	-0.923426					YLR342W	YLR342W	35.5315	30.6325	1.15993	-0.876604							YCR079W
YML016C	YML016C	32.4795	27.782	1.16908	-0.863794					YDR163W	YDR163W	35.7566	30.7113	1.16428	-0.921339					YDR378C	YDR378C	36.9967	31.8955	1.15993	-0.876452							YMR294W
YPL227C	YPL227C	32.0972	27.4542	1.16912	-0.863114					YLR092W	YLR092W	35.5104	30.4982	1.16434	-0.920124					YGL203C	YGL203C	34.5179	29.7575	1.15997	-0.875675							YJR066W
YPL097W	YPL097W	33.4545	28.6144	1.16915	-0.862538					YGR220C	YGR220C	37.1763	31.9288	1.16435	-0.919973					YBL007C	YBL007C	36.5466	31.5037	1.16007	-0.873764							YPR095C
YBL007C	YBL007C	34.4815	29.4918	1.16919	-0.86167					YDR494W	YDR494W	36.1317	31.0307	1.16438	-0.919365					YGL027C	YGL027C	35.4704	30.5757	1.16009	-0.873483							YPR074C
YKL176C	YKL176C	34.627	29.6161	1.1692	-0.861584					YKL212W	YKL212W	33.7254	28.9598	1.16456	-0.916005					YKR027W	YKR027W	36.9455	31.8441	1.1602	-0.871338							YCR059C
YMR319C	YMR319C	33.594	28.7322	1.16921	-0.861243					YOR094W	YOR094W	38.8161	33.3284	1.16466	-0.914201					YML003W	YML003W	34.5	29.735	1.16025	-0.870316							YOL018C
YBL027W	YBL027W	32.571	27.8544	1.16933	-0.858899					YGL027C	YGL027C	35.2464	30.2617	1.16472	-0.91299					YPL135W	YPL135W	37.0169	31.9039	1.16026	-0.870104							YLR332W
YOR182C	YOR182C	36.3373	31.067	1.16965	-0.852655					YFL012W	YFL012W	37.0012	31.7648	1.16485	-0.910616					YGR151C	YGR151C	34.252	29.5162	1.16045	-0.866394							YCR034W
YOL118C	YOL118C	35.0927	29.9962	1.1699	-0.847551					YGR151C	YGR151C	34.8574	29.9213	1.16497	-0.908255					YLR250W	YLR250W	36.599	31.5386	1.16045	-0.866353							YBR139W
YOL138C	YOL138C	35.2904	30.1645	1.16993	-0.846999					YLR169W	YLR169W	37.583	32.2599	1.16501	-0.907592					YKL001C	YKL001C	37.6426	32.4351	1.16055	-0.864435							YLR268W
YPR146C	YPR146C	36.552	31.2408	1.17001	-0.845473					YPL114W	YPL114W	36.5238	31.3493	1.16506	-0.906608					YDR372C	YDR372C	36.4042	31.3641	1.1607	-0.861574							YGL110C
YFR008W	YFR008W	34.594	29.5666	1.17004	-0.84487					YMR030W	YMR030W	36.4845	31.3142	1.16511	-0.905632					YMR042W	YMR042W	37.7173	32.4948	1.16072	-0.861203							YOR030W
YER167W	YER167W	37.8731	32.3672	1.17011	-0.843473					YER098W	YER098W	37.2439	31.9642	1.16517	-0.904429					YLR373C	YLR373C	36.1627	31.1539	1.16078	-0.860049							YPR083W
YCR020C	YCR020C	34.7822	29.7235	1.17019	-0.841863					YMR034C	YMR034C	37.8685	32.4951	1.16536	-0.900934					YNL226W	YNL226W	33.047	28.4692	1.1608	-0.859668							YPL262W
YDR442W	YDR442W	36.4859	31.1782	1.17024	-0.840933					YOR306C	YOR306C	35.207	30.2096	1.16542	-0.899693					YPL154C	YPL154C	35.9663	30.9837	1.16081	-0.859356							YER177W
YKL043W	YKL043W	32.005	27.3484	1.17027	-0.840229					YLR333C	YLR333C	37.0308	31.7723	1.1655	-0.898163					YML087C	YML087C	36.2508	31.228	1.16084	-0.858794							YNL288W
YAL055W	YAL055W	32.2892	27.5894	1.17035	-0.838726					YDR323C	YDR323C	35.5922	30.5365	1.16556	-0.897048					YNR052C	YNR052C	40.9262	35.254	1.16089	-0.857792							YMR256C
YLR058C	YLR058C	33.5892	28.6993	1.17038	-0.83804					YNL084C	YNL084C	37.2666	31.9722	1.16559	-0.896479					YDR428C	YDR428C	37.5501	32.3454	1.16091	-0.85747							YNL077W
YDR271C	YDR271C	33.7681	28.8517	1.1704	-0.837693					YDL062W	YDL062W	32.9204	28.2432	1.1656	-0.896278					YDL032W	YDL032W	33.7617	29.0789	1.16104	-0.854969							YCR089W
YEL066W	YEL066W	34.44	29.4254	1.17042	-0.837333					YDL090C	YDL090C	36.3715	31.202	1.16568	-0.894875					YOR345C	YOR345C	35.7062	30.7464	1.16131	-0.849657							YLL006W
YMR052W	YMR052W	35.5675	30.3846	1.17058	-0.834227					YDR386W	YDR386W	36.8751	31.6322	1.16575	-0.893556					YBR035C	YBR035C	37.6192	32.3927	1.16135	-0.848955							YDR293C
YPL170W	YPL170W	33.7287	28.8135	1.17058	-0.834044					YCR028C	YCR028C	35.1728	30.1702	1.16581	-0.892317					YNL278W	YNL278W	34.4548	29.6668	1.16139	-0.848122							YPL259C
YML073C	YML073C	31.1516	26.611	1.17063	-0.833141					YNL278W	YNL278W	35.0964	30.1025	1.1659	-0.890726					YPL090C	YPL090C	34.2445	29.4856	1.1614	-0.848018							YKR091W
YNL096C	YNL096C	36.0715	30.8136	1.17064	-0.832983					YKL092C	YKL092C	33.8264	29.0111	1.16598	-0.889143					YNL302C	YNL302C	37.2964	32.1107	1.16149	-0.846137							YLR371W
YDR450W	YDR450W	34.7968	29.7187	1.17087	-0.828385					YIR023W	YIR023W	39.9107	34.2266	1.16607	-0.887389					YDR518W	YDR518W	36.0065	30.9998	1.16151	-0.845852							YLR150W
YBR162W-A	YBR162W-A	34.4484	29.4159	1.17108	-0.824253					YLR047C	YLR047C	37.3798	32.0556	1.16609	-0.887082					YDR520C	YDR520C	37.6057	32.3751	1.16156	-0.844805							YCR063W
YDR071C	YDR071C	33.48	28.5889	1.17108	-0.824176					YCL025C	YCL025C	36.0424	30.9076	1.16613	-0.886246					YDR199W	YDR199W	36.6554	31.5569	1.16157	-0.844675							YHR142W
YMR178W	YMR178W	33.967	29.0046	1.17109	-0.823978					YLR110C	YLR110C	36.3152	31.1404	1.16618	-0.885456					YPL166W	YPL166W	37.3858	32.1852	1.16158	-0.84442							YJR044C
YMR276W	YMR276W	33.3761	28.4978	1.17118	-0.822275					YKL077W	YKL077W	36.1695	31.0146	1.16621	-0.884845					YDR382W	YDR382W	33.0522	28.4545	1.16158	-0.844397							YKR046C
YPR047W	YPR047W	35.7476	30.522	1.17121	-0.82174					YDR417C	YDR417C	31.1599	26.7184	1.16623	-0.884397					YDL210W	YDL210W	38.2268	32.9089	1.16159	-0.844156							YBR076W
YGL005C	YGL005C	33.5453	28.6399	1.17128	-0.820312					YER131W	YER131W	37.2297	31.923	1.16623	-0.884368					YMR124W	YMR124W	36.2869	31.2376	1.16164	-0.843247							YGL219C
YKL050C	YKL050C	33.7177	28.7869	1.17128	-0.820168					YDL027C	YDL027C	36.6949	31.4633	1.16628	-0.883577					YLR092W	YLR092W	36.0785	31.0576	1.16167	-0.842754							YLR064W
YMR157C	YMR157C	34.4776	29.435	1.17131	-0.819628					YDR298C	YDR298C	35.6809	30.5902	1.16642	-0.880896					YMR148W	YMR148W	36.0584	31.0347	1.16187	-0.838738							YLR262C
YLR168C	YLR168C	33.6484	28.7264	1.17134	-0.819055					YOR345C	YOR345C	36.0915	30.9417	1.16644	-0.880518					YHR203C	YHR203C	37.633	32.3886	1.16192	-0.837789							YML028W
YPR052C	YPR052C	32.4565	27.7088	1.17134	-0.818991					YBR299W	YBR299W	36.4119	31.2149	1.16649	-0.879523					YAL021C	YAL021C	43.4879	37.4272	1.16194	-0.837545							YDR247W
YLR081W	YLR081W	35.4086	30.2268	1.17143	-0.817286					YLR261C	YLR261C	37.7295	32.3444	1.16649	-0.879463					YDR295C	YDR295C	38.3713	33.0228	1.16196	-0.836978							YAL039C
YMR266W	YMR266W	33.7796	28.8342	1.17151	-0.815686					YDR522C	YDR522C	35.9269	30.799	1.1665	-0.879405					YER087W	YER087W	35.7078	30.7306	1.16196	-0.836972							YGR086C
YBR147W	YBR147W	35.0511	29.9192	1.17153	-0.815363					YML052W	YML052W	37.3171	31.9789	1.16693	-0.871255					YDR386W	YDR386W	37.0986	31.9261	1.16201	-0.836025							YBR289W
YMR159C	YMR159C	34.1459	29.1433	1.17166	-0.812826					YIL069C	YIL069C	39.0566	33.4676	1.167	-0.869944					YKL175W	YKL175W	38.0697	32.7601	1.16208	-0.83482							YML008C
YKL081W	YKL081W	32.6	27.8221	1.17173	-0.811347					YLR098C	YLR098C	36.4613	31.243	1.16702	-0.869464					YNL127W	YNL127W	38.0006	32.6972	1.1622	-0.83248							YBR044C
YGR226C	YGR226C	34.189	29.1767	1.17179	-0.810136					YMR158W-A	YMR158W-A	37.6807	32.2854	1.16711	-0.867733					YOL136C	YOL136C	36.3577	31.2836	1.1622	-0.832422							YNL119W
YOL091W	YOL091W	34.1165	29.114	1.17183	-0.809435					YGR222W	YGR222W	35.6095	30.5102	1.16713	-0.86736					YJR048W	YJR048W	40.0557	34.4629	1.16228	-0.830784							YJL163C
YNL227C	YNL227C	31.2446	26.663	1.17183	-0.809292					YKL079W	YKL079W	35.9528	30.8043	1.16714	-0.867282					YKL027W	YKL027W	38.4918	33.1153	1.16236	-0.829337							YJR117W
YOR096W	YOR096W	32.7618	27.9566	1.17188	-0.80839					YML033W	YML033W	37.124	31.8036	1.16729	-0.864454					YOR036W	YOR036W	35.3511	30.4119	1.16241	-0.828329							YER130C
YPR179C	YPR179C	32.3151	27.5744	1.17193	-0.807482					YDL096C	YDL096C	35.1001	30.0692	1.16731	-0.863974					YHR081W	YHR081W	37.1475	31.9564	1.16244	-0.82768							YGR130C
YNL003C	YNL003C	31.2935	26.7006	1.17201	-0.805704					YBR036C	YBR036C	34.3993	29.4682	1.16733	-0.863542					YCR016W	YCR016W	36.3767	31.2933	1.16245	-0.827619							YEL050C
YJL148W	YJL148W	32.3749	27.6233	1.17202	-0.805697					YMR123W	YMR123W	37.269	31.9244	1.16741	-0.862101					YLR308W	YLR308W	37.0794	31.8961	1.16251	-0.826435							YNL135C
YJR129C	YJR129C	34.9905	29.8548	1.17202	-0.805532					YBR233W	YBR233W	36.2493	31.0497	1.16746	-0.861126					YLR289W	YLR289W	36.1401	31.0859	1.16259	-0.824823							YOR065W
YLR318W	YLR318W	33.7118	28.7632	1.17205	-0.805101					YOR106W	YOR106W	34.1233	29.2247	1.16762	-0.858211					YFR007W	YFR007W	37.6819	32.4112	1.16262	-0.824226							YIL130W
YMR052C-A	YMR052C-A	34.6998	29.604	1.17213	-0.803376					YLR072W	YLR072W	37.2797	31.9272	1.16765	-0.857669					YDR101C	YDR101C	34.7016	29.8464	1.16267	-0.823222							YHR049W
YMR282C	YMR282C	33.3227	28.4291	1.17213	-0.803362					YBR129C	YBR129C	38.5505	33.0154	1.16765	-0.857564					YLR392C	YLR392C	36.0565	31.0108	1.16271	-0.822574							YPR134W
YOR315W	YOR315W	32.7758	27.9594	1.17226	-0.800786					YCL033C	YCL033C	38.6767	33.1185	1.16783	-0.854219					YOL107W	YOL107W	36.7101	31.5727	1.16272	-0.822351							YPL241C
YPL173W	YPL173W	34.1343	29.1168	1.17232	-0.799585					YNL111C	YNL111C	37.8669	32.4244	1.16785	-0.853719					YML050W	YML050W	36.139	31.08	1.16277	-0.821266							YPL026C
YLR096W	YLR096W	34.5012	29.4287	1.17236	-0.79879					YNL167C	YNL167C	36.1706	30.9713	1.16787	-0.853341					YLR081W	YLR081W	38.0432	32.7157	1.16284	-0.819913							YEL003W
YML001W	YML001W	32.9491	28.1036	1.17241	-0.797793					YPL096W	YPL096W	36.8261	31.5311	1.16793	-0.852245					YDL181W	YDL181W	33.7007	28.9779	1.16298	-0.817229							YKL170W
YIL076W	YIL076W	33.1795	28.2995	1.17244	-0.797283					YMR199W	YMR199W	36.0941	30.9041	1.16794	-0.852133					YDR155C	YDR155C	37.7894	32.4892	1.16314	-0.814142							YIL090W
YOR014W	YOR014W	38.0294	32.4354	1.17247	-0.796754					YER151C	YER151C	40.1525	34.3785	1.16795	-0.85182					YGR027C	YGR027C	38.5078	33.1065	1.16315	-0.813981							YLR410W
YGR016W	YGR016W	34.2598	29.2194	1.1725	-0.796014					YDR451C	YDR451C	35.7284	30.5835	1.16822	-0.846719					YJR110W	YJR110W	36.0988	31.0324	1.16326	-0.811754							YGL057C
YPR093C	YPR093C	34.1536	29.1287	1.1725	-0.79601					YMR292W	YMR292W	36.5706	31.3043	1.16823	-0.846635					YHR012W	YHR012W	34.716	29.843	1.16329	-0.811287							YGR040W
YHL013C	YHL013C	33.7001	28.7416	1.17252	-0.795716					YIL158W	YIL158W	35.8217	30.6592	1.16838	-0.843686					YFR021W	YFR021W	36.8921	31.7066	1.16355	-0.806181							YHL022C
YML051W	YML051W	34.4453	29.3769	1.17253	-0.795527					YMR274C	YMR274C	35.8487	30.6815	1.16841	-0.843164					YOR306C	YOR306C	36.1385	31.0583	1.16357	-0.805786							YDR195W
YAR037W	YAR037W	36.1204	30.8045	1.17257	-0.794708					YHR206W	YHR206W	36.1642	30.9485	1.16853	-0.840948					YLR170C	YLR170C	40.2365	34.5799	1.16358	-0.80554							YPR043W
YER080W	YER080W	33.9871	28.9848	1.17258	-0.794418					YGR229C	YGR229C	36.8804	31.5597	1.16859	-0.839772					YFL048C	YFL048C	36.5708	31.4291	1.1636	-0.805237							YJL178C
YDR272W	YDR272W	34.9549	29.8059	1.17275	-0.791055					YJL036W	YJL036W	35.5648	30.4333	1.16861	-0.839335					YBR206W	YBR206W	36.456	31.3302	1.1636	-0.805138							YNL299W
YDL210W	YDL210W	35.6252	30.3768	1.17278	-0.790551					YJL052W	YJL052W	36.8261	31.5121	1.16863	-0.838996					YLR107W	YLR107W	36.6666	31.5109	1.16361	-0.804899							YIR033W
YLR039C	YLR039C	34.053	29.0353	1.17281	-0.789897					YDL083C	YDL083C	36.48	31.2135	1.16873	-0.837203					YLR344W	YLR344W	36.2017	31.1035	1.16391	-0.799162							YMR299C
YDR287W	YDR287W	36.4056	31.0411	1.17282	-0.789728					YLR392C	YLR392C	36.4266	31.1669	1.16876	-0.836624					YMR109W	YMR109W	36.1243	31.0354	1.16397	-0.797987							YIL128W
YFL027C	YFL027C	34.7081	29.5933	1.17284	-0.789426					YPR012W	YPR012W	36.0107	30.8092	1.16883	-0.835264					YBR162W-A	YBR162W-A	36.8854	31.6881	1.16401	-0.79717							YKL110C
YFR007W	YFR007W	34.4958	29.4121	1.17285	-0.789248					YIR044C	YIR044C	35.1787	30.0946	1.16894	-0.833217					YLR381W	YLR381W	38.7121	33.2558	1.16407	-0.79604							YPR023C
YPR036W	YPR036W	32.4015	27.6261	1.17286	-0.788954					YMR178W	YMR178W	37.0229	31.6713	1.16897	-0.832539					YLR387C	YLR387C	37.3766	32.1085	1.16407	-0.795977							YGR188C
YOR367W	YOR367W	34.0894	29.0648	1.17287	-0.788681					YLR308W	YLR308W	37.7595	32.3009	1.16899	-0.832186					YOR293W	YOR293W	37.4558	32.1761	1.16409	-0.795728							YNL050C
YFL048C	YFL048C	34.8362	29.6988	1.17298	-0.786522					YPR028W	YPR028W	35.9037	30.7125	1.16903	-0.831557					YDR435C	YDR435C	40.145	34.486	1.16409	-0.795602							YJL098W
YPL150W	YPL150W	34.2211	29.1725	1.17306	-0.784995					YMR291W	YMR291W	38.2279	32.6983	1.16911	-0.829956					YDR271C	YDR271C	36.4603	31.3188	1.16417	-0.7942							YBL082C
YFR021W	YFR021W	34.4743	29.3877	1.17309	-0.784486					YFL031W	YFL031W	37.5637	32.1296	1.16913	-0.829567					YBR078W	YBR078W	37.3188	32.056	1.16418	-0.794007							YGR122W
YGR273C	YGR273C	33.0555	28.1755	1.1732	-0.782188					YDR372C	YDR372C	36.9187	31.5763	1.16919	-0.82847					YKL176C	YKL176C	36.6279	31.4625	1.16418	-0.793984							YJL070C
YGR034W	YGR034W	34.2984	29.2342	1.17323	-0.781646					YLR296W	YLR296W	36.7301	31.4144	1.16921	-0.828015					YHR127W	YHR127W	34.6492	29.7623	1.1642	-0.793541							YGR196C
YDR314C	YDR314C	35.0187	29.8476	1.17325	-0.781269					YDL010W	YDL010W	36.5413	31.2529	1.16921	-0.827977					YDR491C	YDR491C	36.9223	31.7145	1.16421	-0.793388							YLR286C
YPL079W	YPL079W	35.1814	29.9863	1.17325	-0.781235					YOR333C	YOR333C	34.0855	29.1504	1.1693	-0.8264					YML057W	YML057W	38.46	33.0335	1.16427	-0.792124							YNL255C
YJR075W	YJR075W	36.4981	31.1063	1.17333	-0.779594					YLR387C	YLR387C	37.3007	31.8999	1.1693	-0.826334					YJL028W	YJL028W	38.5891	33.1423	1.16435	-0.790668							YOR275C
YMR292W	YMR292W	34.1253	29.0837	1.17335	-0.77924					YML087C	YML087C	36.3595	31.0942	1.16933	-0.825765					YMR285C	YMR285C	36.6397	31.4668	1.16439	-0.789838							YNL154C
YJL022W	YJL022W	36.006	30.6838	1.17345	-0.777179					YDR491C	YDR491C	37.5381	32.0993	1.16944	-0.823813					YMR172C-A	YMR172C-A	37.8036	32.4664	1.16439	-0.789799							YOL068C
YML063W	YML063W	34.8021	29.6575	1.17346	-0.776964					YHR108W	YHR108W	38.0321	32.5217	1.16944	-0.823761					YAL023C	YAL023C	34.5147	29.6396	1.16448	-0.788056							YKL006W
YMR180C	YMR180C	35.5517	30.2954	1.1735	-0.776238					YGR118W	YGR118W	36.4293	31.148	1.16956	-0.821534					YDL083C	YDL083C	36.1385	31.0278	1.16471	-0.783522							YMR077C
YPL109C	YPL109C	34.4972	29.3967	1.1735	-0.77622					YHR127W	YHR127W	34.3423	29.3597	1.16971	-0.818676					YDR442W	YDR442W	39.5834	33.9847	1.16474	-0.782988							YGR239C
YGR219W	YGR219W	34.2069	29.1483	1.17355	-0.775315					YML034W	YML034W	35.7763	30.5839	1.16978	-0.817349					YFL031W	YFL031W	37.5795	32.2642	1.16474	-0.782933							YGR101W
YPR099C	YPR099C	33.0734	28.1813	1.1736	-0.774362					YCL042W	YCL042W	36.8168	31.4718	1.16984	-0.816225					YKL212W	YKL212W	33.2683	28.5622	1.16477	-0.782493							YNL085W
YGR282C	YGR282C	33.9269	28.9076	1.17363	-0.773679					YLR393W	YLR393W	35.1567	30.0525	1.16984	-0.816077					YJR108W	YJR108W	38.224	32.8158	1.16481	-0.781723							YHR111W
YGL212W	YGL212W	32.793	27.9352	1.1739	-0.768436					YGL025C	YGL025C	35.8145	30.6147	1.16985	-0.816011					YCL042W	YCL042W	37.2922	32.0099	1.16502	-0.777612							YOR247W
YHL036W	YHL036W	34.2352	29.1637	1.1739	-0.768351					YMR187C	YMR187C	37.0483	31.6692	1.16985	-0.815916					YPL150W	YPL150W	36.7995	31.5858	1.16507	-0.776671							YJL160C
YML033W	YML033W	33.2617	28.3339	1.17392	-0.767952					YDR271C	YDR271C	36.208	30.9489	1.16993	-0.814468					YMR170C	YMR170C	36.7397	31.532	1.16516	-0.774919							YJL123C
YOL109W	YOL109W	34.024	28.9821	1.17397	-0.767011					YLR173W	YLR173W	37.3971	31.9647	1.16995	-0.814036					YOR139C	YOR139C	36.4553	31.2872	1.16518	-0.774432							YOR360C
YMR072W	YMR072W	35.0851	29.8854	1.17399	-0.766578					YDR377W	YDR377W	36.1863	30.9285	1.17	-0.813151					YJL036W	YJL036W	35.8118	30.7341	1.16521	-0.773803							YHR129C
YLR388W	YLR388W	34.2728	29.1929	1.17401	-0.766133					YAL023C	YAL023C	34.7603	29.7085	1.17004	-0.812321					YGR222W	YGR222W	34.7713	29.8403	1.16525	-0.773205							YDR488C
YPR140W	YPR140W	33.8064	28.7951	1.17403	-0.765694					YJL028W	YJL028W	37.6886	32.2105	1.17007	-0.811756					YMR039C	YMR039C	39.9361	34.2724	1.16526	-0.773019							YDL069C
YDR529C	YDR529C	34.1539	29.091	1.17404	-0.765649					YGR228W	YGR228W	37.3781	31.9439	1.17012	-0.810895					YLR216C	YLR216C	38.0203	32.6268	1.16531	-0.771958							YBR133C
YFL028C	YFL028C	35.7572	30.4565	1.17404	-0.765524					YLR269C	YLR269C	38.2476	32.6868	1.17012	-0.810777					YKL056C	YKL056C	37.4097	32.1018	1.16535	-0.771249							YJR082C
YJR108W	YJR108W	34.524	29.4041	1.17412	-0.763979					YPL170W	YPL170W	36.7488	31.4044	1.17018	-0.809721					YPR070W	YPR070W	34.9851	30.0205	1.16537	-0.770719							YPR164W
YDR517W	YDR517W	33.9343	28.9012	1.17415	-0.763439					YOR355W	YOR355W	34.6628	29.6215	1.17019	-0.809519					YBR171W	YBR171W	39.4196	33.8217	1.16551	-0.768052							YOR216C
YPL023C	YPL023C	33.8778	28.853	1.17415	-0.763339					YMR002W	YMR002W	37.4168	31.9745	1.17021	-0.809206					YCL058C	YCL058C	36.7108	31.4966	1.16555	-0.767309							YAL005C
YDR419W	YDR419W	34.6745	29.5297	1.17422	-0.761919					YGR219W	YGR219W	36.0956	30.8452	1.17022	-0.809001					YMR118C	YMR118C	37.6513	32.3031	1.16557	-0.766986							YLR018C
YDR111C	YDR111C	34.9108	29.7271	1.17438	-0.758915					YER178W	YER178W	35.9462	30.7147	1.17033	-0.806913					YMR123W	YMR123W	37.2925	31.9949	1.16558	-0.766743							YIL008W
YCL049C	YCL049C	34.6842	29.5336	1.1744	-0.758491					YOR167C	YOR167C	37.4547	32.0036	1.17033	-0.806903					YFL033C	YFL033C	37.6566	32.3039	1.1657	-0.764433							YOR231W
YIR023W	YIR023W	36.0297	30.6792	1.1744	-0.758406					YOR305W	YOR305W	34.1616	29.189	1.17036	-0.806359					YLR333C	YLR333C	36.5106	31.3206	1.16571	-0.7642							YML103C
YLR289W	YLR289W	33.8258	28.7919	1.17484	-0.749798					YAL049C	YAL049C	36.4576	31.1495	1.17041	-0.805397					YDR387C	YDR387C	35.5801	30.5196	1.16581	-0.762197							YBR260C
YJR080C	YJR080C	35.1508	29.9192	1.17486	-0.749402					YBR078W	YBR078W	37.8914	32.374	1.17043	-0.805038					YBR137W	YBR137W	37.2278	31.9328	1.16582	-0.762069							YDR042C
YDR137W	YDR137W	33.7191	28.7006	1.17486	-0.749324					YPL109C	YPL109C	36.5506	31.2275	1.17046	-0.804384					YOL108C	YOL108C	37.672	32.313	1.16584	-0.761572							YLR200W
YBR008C	YBR008C	33.515	28.5266	1.17487	-0.749177					YKL050C	YKL050C	37.4327	31.9767	1.17063	-0.801288					YGR064W	YGR064W	33.5435	28.771	1.16588	-0.76091							YJL099W
YBR103W	YBR103W	33.0513	28.1306	1.17492	-0.748054					YPL226W	YPL226W	35.5653	30.3814	1.17063	-0.801262					YKL094W	YKL094W	36.6256	31.4138	1.16591	-0.760343							YOR197W
YMR010W	YMR010W	34.217	29.1217	1.17497	-0.747214					YDR517W	YDR517W	37.116	31.7057	1.17064	-0.800997					YML011C	YML011C	37.2536	31.9518	1.16593	-0.759864							YLR024C
YKR084C	YKR084C	36.0382	30.668	1.17511	-0.744377					YLR338W	YLR338W	38.3147	32.7286	1.17068	-0.800216					YDR097C	YDR097C	37.0149	31.7468	1.16594	-0.759656							YKL139W
YOR139C	YOR139C	33.9234	28.8637	1.1753	-0.740635					YLR389C	YLR389C	36.295	31.0015	1.17075	-0.798982					YEL066W	YEL066W	37.1957	31.9013	1.16596	-0.759273							YIL077C
YJR048W	YJR048W	36.8584	31.3572	1.17544	-0.737893					YDR295C	YDR295C	38.13	32.5657	1.17086	-0.796802					YDR314C	YDR314C	38.5001	33.0196	1.16598	-0.758985							YLR452C
YDL135C	YDL135C	32.7854	27.8897	1.17553	-0.73595					YBR018C	YBR018C	36.1606	30.8829	1.17089	-0.796242					YCL033C	YCL033C	38.5576	33.0672	1.16604	-0.757847							YML094W
YMR088C	YMR088C	35.3553	30.0745	1.17559	-0.734846					YBR259W	YBR259W	37.0152	31.6122	1.17092	-0.795795					YKR044W	YKR044W	36.3378	31.1622	1.16609	-0.756872							YOR038C
YDR524C	YDR524C	33.811	28.7597	1.17564	-0.733905					YDR155C	YDR155C	37.531	32.0501	1.17101	-0.794054					YMR292W	YMR292W	36.4921	31.2938	1.16611	-0.756341							YML128C
YPL168W	YPL168W	35.558	30.2454	1.17565	-0.733658					YLR058C	YLR058C	36.7334	31.3679	1.17105	-0.793253					YJL052W	YJL052W	37.1376	31.8457	1.16617	-0.755195							YNL136W
YJR098C	YJR098C	35.0333	29.7985	1.17567	-0.7332					YAL026C	YAL026C	34.0108	29.042	1.17109	-0.792487					YOR026W	YOR026W	35.7351	30.6427	1.16619	-0.754884							YIL038C
YOL048C	YOL048C	33.6706	28.6391	1.17569	-0.732913					YGR184C	YGR184C	35.4677	30.2857	1.1711	-0.792247					YFL027C	YFL027C	38.0717	32.6462	1.16619	-0.754821							YOR043W
YOR276W	YOR276W	37.7821	32.1337	1.17578	-0.731132					YDR111C	YDR111C	36.8038	31.4252	1.17116	-0.791217					YBR227C	YBR227C	37.4152	32.0822	1.16623	-0.754066							YDR334W
YLR261C	YLR261C	36.0782	30.6843	1.17579	-0.730941					YKL098W	YKL098W	35.7567	30.5296	1.17121	-0.79015					YDL096C	YDL096C	35.3428	30.3039	1.16628	-0.753103							YKL164C
YOL014W	YOL014W	35.6036	30.2802	1.17581	-0.73056					YDR378C	YDR378C	36.9343	31.5311	1.17136	-0.787409					YFR022W	YFR022W	36.0941	30.9479	1.16629	-0.752964							YCR077C
YMR066W	YMR066W	33.772	28.7223	1.17581	-0.730457					YOL087C	YOL087C	36.6319	31.2727	1.17137	-0.787257					YLR385C	YLR385C	37.6623	32.2908	1.16635	-0.751761							YNL307C
YDR128W	YDR128W	34.6288	29.4509	1.17581	-0.730411					YGL095C	YGL095C	35.5097	30.3134	1.17142	-0.78628					YOR126C	YOR126C	35.5877	30.5117	1.16636	-0.751465							YPL174C
YPR060C	YPR060C	35.4258	30.1276	1.17586	-0.729511					YFR022W	YFR022W	36.433	31.0992	1.17151	-0.784547					YDR156W	YDR156W	37.4874	32.1403	1.16637	-0.751392							YMR063W
YLR107W	YLR107W	34.4043	29.257	1.17593	-0.728084					YDR253C	YDR253C	37.5659	32.0646	1.17157	-0.783396					YDR226W	YDR226W	42.6094	36.5313	1.16638	-0.751147							YKR042W
YHR108W	YHR108W	34.856	29.6406	1.17596	-0.727594					YDR137W	YDR137W	36.002	30.7294	1.17158	-0.783212					YPL096W	YPL096W	38.0324	32.604	1.16649	-0.74893							YIL055C
YDL226C	YDL226C	32.2345	27.4072	1.17614	-0.724047					YFL033C	YFL033C	38.4837	32.8474	1.17159	-0.783058					YGR034W	YGR034W	36.0693	30.9211	1.1665	-0.748914							YGR200C
YPR124W	YPR124W	34.8223	29.6073	1.17614	-0.724002					YDL082W	YDL082W	35.9727	30.7037	1.17161	-0.782722					YKL077W	YKL077W	36.4607	31.2535	1.16661	-0.746628							YOL003C
YLR280C	YLR280C	34.505	29.3372	1.17615	-0.72375					YPR139C	YPR139C	40.4739	34.5451	1.17163	-0.782383					YMR158W-A	YMR158W-A	38.0993	32.6573	1.16664	-0.746136							YPL089C
YMR086W	YMR086W	32.0983	27.2906	1.17617	-0.723424					YDR204W	YDR204W	39.0656	33.3426	1.17164	-0.782053					YDR517W	YDR517W	37.9048	32.4905	1.16664	-0.746064							YHL027W
YMR039C	YMR039C	36.2851	30.8489	1.17622	-0.722412					YLR373C	YLR373C	35.8869	30.6265	1.17176	-0.779853					YDL063C	YDL063C	33.3651	28.5988	1.16666	-0.745718							YJL095W
YBR162C	YBR162C	32.5998	27.7153	1.17624	-0.721997					YML018C	YML018C	35.7786	30.5335	1.17178	-0.779424					YBL033C	YBL033C	35.5167	30.4419	1.16671	-0.744793							YMR100W
YNR072W	YNR072W	35.0872	29.8294	1.17626	-0.721483					YDR024W	YDR024W	37.0678	31.6336	1.17179	-0.779343					YPL227C	YPL227C	34.3119	29.4092	1.16671	-0.744778							YBR200W
YJR147W	YJR147W	32.6128	27.7214	1.17645	-0.71784					YKL020C	YKL020C	36.9883	31.5656	1.17179	-0.779278					YNL111C	YNL111C	38.0735	32.6325	1.16673	-0.744275							YPL101W
YCR019W	YCR019W	34.062	28.9532	1.17645	-0.717821					YJL124C	YJL124C	35.3207	30.1402	1.17188	-0.777552					YDR456W	YDR456W	36.0821	30.9253	1.16675	-0.743936							YOR039W
YER122C	YER122C	32.2219	27.3884	1.17648	-0.717251					YJL030W	YJL030W	34.5451	29.4779	1.1719	-0.777194					YBR037C	YBR037C	35.3316	30.282	1.16675	-0.743913							YMR154C
YOL032W	YOL032W	33.6262	28.5816	1.1765	-0.716863					YJR032W	YJR032W	39.36	33.5861	1.17192	-0.776898					YJR031C	YJR031C	35.4372	30.3713	1.1668	-0.742983							YLL002W
YGL021W	YGL021W	33.9732	28.8754	1.17654	-0.715963					YLR120C	YLR120C	34.0772	29.0782	1.17192	-0.776859					YDL090C	YDL090C	37.113	31.8067	1.16683	-0.742459							YDL116W
YNL228W	YNL228W	31.2142	26.5302	1.17656	-0.715718					YOL047C	YOL047C	38.0298	32.4506	1.17193	-0.776609					YMR066W	YMR066W	36.6456	31.403	1.16695	-0.740149							YLR052W
YPL176C	YPL176C	34.5435	29.3589	1.1766	-0.714924					YKR084C	YKR084C	38.6559	32.9817	1.17204	-0.774534					YER153C	YER153C	34.9761	29.9712	1.16699	-0.739238							YPR188C
YEL064C	YEL064C	33.9342	28.8392	1.17667	-0.713421					YLR039C	YLR039C	37.2412	31.7746	1.17204	-0.774462					YJR032W	YJR032W	39.364	33.7306	1.16701	-0.738848							YPL049C
YOL137W	YOL137W	34.7316	29.516	1.1767	-0.712816					YGR255C	YGR255C	34.4731	29.4113	1.1721	-0.773355					YLR120C	YLR120C	34.3434	29.4262	1.1671	-0.737108							YMR312W
YOL081W	YOL081W	32.3969	27.5307	1.17675	-0.711776					YMR039C	YMR039C	39.9049	34.0437	1.17217	-0.772125					YDL010W	YDL010W	36.8444	31.5684	1.16713	-0.736623							YHR030C
YCL050C	YCL050C	37.4248	31.8012	1.17684	-0.710149					YER087W	YER087W	35.5949	30.365	1.17223	-0.770883					YLR189C	YLR189C	35.948	30.7993	1.16717	-0.735817							YDR363W-A
YBR235W	YBR235W	34.561	29.3677	1.17684	-0.710105					YPR127W	YPR127W	35.292	30.1061	1.17225	-0.770495					YDR431W	YDR431W	36.7367	31.4719	1.16728	-0.733585							YKR072C
YBR227C	YBR227C	35.0053	29.7442	1.17688	-0.709306					YKL176C	YKL176C	36.504	31.1396	1.17227	-0.77021					YDL107W	YDL107W	35.2033	30.1559	1.16738	-0.731729							YJL159W
YKL185W	YKL185W	31.8097	27.0282	1.17691	-0.708773					YPL162C	YPL162C	36.6458	31.2597	1.1723	-0.769561					YKL037W	YKL037W	34.4995	29.5522	1.16741	-0.731154							YMR224C
YOL101C	YOL101C	34.1281	28.9969	1.17696	-0.707722					YDR108W	YDR108W	35.9387	30.6519	1.17248	-0.766235					YMR266W	YMR266W	37.004	31.6962	1.16746	-0.730179							YER040W
YLR387C	YLR387C	33.6869	28.6204	1.17702	-0.706447					YGR034W	YGR034W	36.4461	31.0842	1.17249	-0.765931					YPR052C	YPR052C	34.9189	29.91	1.16747	-0.730054							YPL078C
YKR017C	YKR017C	34.2302	29.0807	1.17708	-0.705391					YJR010W	YJR010W	36.538	31.162	1.17252	-0.765524					YOL099C	YOL099C	37.241	31.897	1.16754	-0.728613							YDL106C
YLR091W	YLR091W	32.4986	27.6095	1.17708	-0.705337					YMR088C	YMR088C	37.4767	31.9619	1.17254	-0.764996					YHL036W	YHL036W	36.4714	31.2377	1.16754	-0.728517							YLR182W
YOL087C	YOL087C	34.2074	29.0603	1.17712	-0.704602					YPL068C	YPL068C	37.5596	32.0322	1.17256	-0.764729					YPL173W	YPL173W	35.7669	30.631	1.16767	-0.726081							YDL133W
YHR206W	YHR206W	34.8321	29.5904	1.17714	-0.704121					YBR268W	YBR268W	35.4998	30.2743	1.1726	-0.763879					YLR290C	YLR290C	35.8621	30.712	1.16769	-0.725724							YJL179W
YDR101C	YDR101C	33.1335	28.1471	1.17715	-0.70384					YKL027W	YKL027W	38.3569	32.706	1.17278	-0.760608					YDR494W	YDR494W	37.0387	31.7194	1.1677	-0.725553							YJL128C
YDR320C	YDR320C	35.5194	30.1738	1.17716	-0.703743					YDR520C	YDR520C	37.0954	31.6304	1.17278	-0.760584					YPR140W	YPR140W	36.7498	31.4701	1.16777	-0.724221							YAL020C
YJL028W	YJL028W	34.4077	29.2292	1.17717	-0.7036					YKL175W	YKL175W	38.0743	32.4641	1.17281	-0.759916					YJR080C	YJR080C	37.4005	32.0262	1.16781	-0.723333							YNL147W
YGL028C	YGL028C	32.62	27.7097	1.1772	-0.702856					YKL056C	YKL056C	37.6819	32.1282	1.17286	-0.759043					YMR159C	YMR159C	37.4751	32.0882	1.16788	-0.722036							YER155C
YLR090W	YLR090W	32.1413	27.303	1.1772	-0.702845					YPR017C	YPR017C	36.5557	31.1676	1.17287	-0.75877					YPR146C	YPR146C	39.6239	33.9278	1.16789	-0.721838							YJL168C
YMR182C	YMR182C	33.5731	28.5191	1.17721	-0.702656					YMR253C	YMR253C	37.9684	32.3713	1.1729	-0.758216					YPL030W	YPL030W	36.231	31.0208	1.16796	-0.720467							YHL029C
YDL093W	YDL093W	33.5001	28.4565	1.17724	-0.702201					YPL090C	YPL090C	34.4151	29.3418	1.1729	-0.758198					YDR419W	YDR419W	37.391	32.0128	1.168	-0.719615							YBR023C
YPL104W	YPL104W	33.3728	28.3458	1.17734	-0.700076					YKL148C	YKL148C	35.813	30.5336	1.1729	-0.758187					YOR332W	YOR332W	37.9951	32.5279	1.16808	-0.71815							YKL032C
YHR143W	YHR143W	32.552	27.6482	1.17736	-0.699705					YKL001C	YKL001C	36.4512	31.0776	1.17291	-0.758087					YOL114C	YOL114C	38.3422	32.8245	1.1681	-0.717774							YOL067C
YPR002W	YPR002W	34.9061	29.6466	1.17741	-0.698852					YMR285C	YMR285C	37.0404	31.5795	1.17293	-0.757779					YMR074C	YMR074C	34.5025	29.536	1.16815	-0.716738							YMR078C
YBR073W	YBR073W	33.8068	28.7123	1.17743	-0.698302					YLR087C	YLR087C	38.2705	32.6277	1.17295	-0.757398					YLR074C	YLR074C	34.643	29.655	1.1682	-0.715772							YMR186W
YKL146W	YKL146W	33.3271	28.3042	1.17746	-0.69782					YFR049W	YFR049W	38.4051	32.7422	1.17295	-0.757249					YNL167C	YNL167C	36.7234	31.4348	1.16824	-0.714979							YOR189W
YIR004W	YIR004W	33.8987	28.7885	1.17751	-0.696807					YML078W	YML078W	36.4908	31.1102	1.17295	-0.757241					YPL170W	YPL170W	37.2221	31.8613	1.16826	-0.714687							YOR359W
YMR291W	YMR291W	34.3277	29.1521	1.17754	-0.696187					YJL162C	YJL162C	34.8265	29.6901	1.173	-0.756328					YMR095C	YMR095C	36.2793	31.0538	1.16827	-0.714388							YBR231C
YDR276C	YDR276C	33.8061	28.709	1.17754	-0.696114					YOL083W	YOL083W	35.7226	30.4537	1.17301	-0.756126					YML051W	YML051W	37.5732	32.1579	1.1684	-0.711951							YOR080W
YDR399W	YDR399W	33.4135	28.3754	1.17755	-0.696005					YJL201W	YJL201W	35.294	30.0883	1.17302	-0.756072					YOL137W	YOL137W	36.4288	31.1777	1.16842	-0.71141							YLR384C
YHR132W-A	YHR132W-A	34.5812	29.3668	1.17756	-0.695818					YCR023C	YCR023C	36.2751	30.9241	1.17304	-0.755667					YFR031C-A	YFR031C-A	39.463	33.7703	1.16857	-0.708575							YIL159W
YCL025C	YCL025C	33.1151	28.121	1.17759	-0.69514					YOR315W	YOR315W	36.4679	31.0881	1.17305	-0.755464					YDR469W	YDR469W	36.5907	31.3108	1.16863	-0.70751							YBL061C
YDR386W	YDR386W	34.3896	29.2031	1.1776	-0.694974					YDR153C	YDR153C	37.5987	32.0492	1.17315	-0.753469					YGR178C	YGR178C	36.3358	31.092	1.16866	-0.70691							YML041C
YMR148W	YMR148W	32.8361	27.8832	1.17763	-0.694402					YOR036W	YOR036W	34.3881	29.3101	1.17325	-0.751597					YJR040W	YJR040W	35.6779	30.5258	1.16878	-0.704509							YDR159W
YER087W	YER087W	33.6245	28.5524	1.17764	-0.69419					YMR042W	YMR042W	38.4289	32.7526	1.17331	-0.75056					YML056C	YML056C	35.1189	30.047	1.1688	-0.704106							YBL079W
YMR002W	YMR002W	34.6323	29.4072	1.17768	-0.693446					YKL185W	YKL185W	33.6147	28.6473	1.1734	-0.748847					YBL024W	YBL024W	39.7026	33.968	1.16882	-0.703693							YDL042C
YKR043C	YKR043C	35.0828	29.7897	1.17768	-0.693402					YGR157W	YGR157W	36.2073	30.8532	1.17353	-0.746262					YOL042W	YOL042W	35.1685	30.0855	1.16895	-0.701187							YPL086C
YOL103W	YOL103W	33.6244	28.5513	1.17768	-0.693336					YDR524C	YDR524C	36.6243	31.2078	1.17356	-0.745772					YNL109W	YNL109W	35.9341	30.7403	1.16896	-0.701092							YDL020C
YFR012W	YFR012W	34.628	29.4026	1.17772	-0.692665					YLL016W	YLL016W	38.1227	32.4843	1.17357	-0.745515					YKL133C	YKL133C	37.1049	31.7407	1.169	-0.700206							YOR295W
YPL166W	YPL166W	35.9696	30.5394	1.17781	-0.690904					YOR126C	YOR126C	35.6669	30.3911	1.1736	-0.745103					YOL041C	YOL041C	33.6789	28.8066	1.16914	-0.697557							YPL256C
YMR172C-A	YMR172C-A	34.8396	29.5782	1.17788	-0.689433					YLR118C	YLR118C	35.725	30.44	1.17362	-0.744652					YGR054W	YGR054W	35.1954	30.1036	1.16914	-0.697482							YIL134W
YML058W	YML058W	33.4604	28.406	1.17793	-0.688433					YJR080C	YJR080C	38.1726	32.5255	1.17362	-0.744626					YPR130C	YPR130C	37.9165	32.4303	1.16917	-0.696899							YGL054C
YLR092W	YLR092W	33.6625	28.5771	1.17795	-0.687998					YFL011W	YFL011W	37.0776	31.5918	1.17364	-0.744186					YPL155C	YPL155C	35.8586	30.6699	1.16918	-0.696757							YAL011W
YOR293W	YOR293W	33.9582	28.8273	1.17799	-0.687273					YCR019W	YCR019W	37.1106	31.6199	1.17365	-0.744153					YJR111C	YJR111C	36.4726	31.1944	1.1692	-0.696271							YNL068C
YJR052W	YJR052W	33.4807	28.42	1.17807	-0.685782					YMR182C	YMR182C	36.1947	30.838	1.17371	-0.743034					YDR024W	YDR024W	37.2514	31.8585	1.16928	-0.694832							YKL101W
YMR156C	YMR156C	34.656	29.4157	1.17815	-0.684137					YMR109W	YMR109W	35.8343	30.5305	1.17372	-0.742787					YJR117W	YJR117W	34.6656	29.646	1.16932	-0.694035							YCR033W
YPL084W	YPL084W	33.5873	28.5083	1.17816	-0.683898					YGL024W	YGL024W	37.2994	31.7757	1.17383	-0.740597					YLR261C	YLR261C	38.3133	32.7651	1.16933	-0.69379							YNL323W
YJR032W	YJR032W	35.3807	30.03	1.17818	-0.683589					YBR006W	YBR006W	36.3799	30.9919	1.17385	-0.74023					YCR019W	YCR019W	36.6226	31.319	1.16934	-0.693609							YHL033C
YPR194C	YPR194C	34.286	29.1006	1.17819	-0.683343					YLR108C	YLR108C	37.7554	32.1596	1.174	-0.737483					YJR037W	YJR037W	34.7417	29.7105	1.16934	-0.693606							YMR116C
YKR021W	YKR021W	33.5701	28.4913	1.17826	-0.68195					YCR107W	YCR107W	36.7138	31.2716	1.17403	-0.736887					YDR017C	YDR017C	38.5495	32.9668	1.16934	-0.693575							YNL138W
YJL164C	YJL164C	34.7162	29.463	1.1783	-0.681188					YOL082W	YOL082W	35.3733	30.1258	1.17419	-0.733952					YML034W	YML034W	35.7098	30.5359	1.16944	-0.691747							YGR092W
YFR020W	YFR020W	35.0818	29.7727	1.17832	-0.680773					YMR118C	YMR118C	38.6858	32.9455	1.17424	-0.732968					YGR118W	YGR118W	36.7428	31.4192	1.16944	-0.691706							YNL064C
YDR452W	YDR452W	33.8252	28.7063	1.17832	-0.680741					YLR363C	YLR363C	37.0598	31.5598	1.17427	-0.732327					YGR227W	YGR227W	37.0213	31.6573	1.16944	-0.69168							YLL049W
YGR257C	YGR257C	32.2367	27.3552	1.17845	-0.678251					YPL100W	YPL100W	35.9953	30.6507	1.17437	-0.730482					YHL013C	YHL013C	35.5669	30.4128	1.16947	-0.691096							YBR126C
YLR083C	YLR083C	34.2662	29.0747	1.17855	-0.676092					YAL058C-A	YAL058C-A	36.6525	31.2078	1.17447	-0.728633					YHR143W	YHR143W	34.9288	29.8668	1.16948	-0.690837							YOR127W
YML011C	YML011C	34.0863	28.9221	1.17856	-0.676088					YKL187C	YKL187C	35.7383	30.4292	1.17447	-0.728481					YLR096W	YLR096W	38.0345	32.5223	1.16949	-0.690684							YDL191W
YDR421W	YDR421W	34.3547	29.1487	1.1786	-0.675191					YGR289C	YGR289C	35.4691	30.1988	1.17452	-0.727598					YBR249C	YBR249C	37.1126	31.7336	1.1695	-0.69044							YDL115C
YDR136C	YDR136C	32.9062	27.9187	1.17864	-0.674305					YGL254W	YGL254W	36.0122	30.6601	1.17456	-0.726774					YLR048W	YLR048W	37.0134	31.646	1.16961	-0.688412							YDR507C
YAR023C	YAR023C	34.7162	29.454	1.17866	-0.673976					YML056C	YML056C	35.0029	29.7999	1.1746	-0.7262					YMR092C	YMR092C	34.7653	29.7236	1.16962	-0.688194							YGR006W
YOL062C	YOL062C	34.3826	29.1708	1.17867	-0.673862					YKR017C	YKR017C	37.232	31.6971	1.17462	-0.725775					YMR199W	YMR199W	36.5101	31.2149	1.16963	-0.687911							YDL081C
YNL074C	YNL074C	34.8042	29.5275	1.1787	-0.673149					YHL042W	YHL042W	36.1963	30.8139	1.17467	-0.724701					YLR400W	YLR400W	37.0158	31.6472	1.16964	-0.687827							YBL058W
YGR168C	YGR168C	34.8627	29.577	1.17871	-0.673043					YBL027W	YBL027W	34.8111	29.6344	1.17469	-0.724485					YCL025C	YCL025C	36.3519	31.0795	1.16964	-0.687787							YKL048C
YCL042W	YCL042W	35.0102	29.7012	1.17875	-0.672238					YPL157W	YPL157W	37.2985	31.7507	1.17473	-0.723583					YKL161C	YKL161C	35.9992	30.778	1.16964	-0.687748							YIL040W
YBR175W	YBR175W	35.0536	29.7375	1.17876	-0.671934					YER175C	YER175C	36.6478	31.1959	1.17476	-0.723006					YFR008W	YFR008W	37.2506	31.847	1.16967	-0.687142							YCR002C
YBR230C	YBR230C	33.9846	28.8306	1.17877	-0.671813					YPR130C	YPR130C	37.5466	31.96	1.1748	-0.722328					YGR226C	YGR226C	36.6971	31.3716	1.16975	-0.685591
YKL094W	YKL094W	33.2212	28.1819	1.17881	-0.670976					YER119C	YER119C	36.9293	31.4344	1.17481	-0.72222					YMR017W	YMR017W	36.747	31.4134	1.16979	-0.684963
YOR304W	YOR304W	33.5205	28.4357	1.17882	-0.670867					YML059C	YML059C	36.3071	30.9046	1.17481	-0.722069					YOR375C	YOR375C	37.4172	31.9845	1.16986	-0.683595
YMR029C	YMR029C	32.3374	27.4317	1.17883	-0.670581					YDL063C	YDL063C	32.8871	27.9918	1.17488	-0.720719					YOL062C	YOL062C	35.9929	30.7654	1.16991	-0.68247
YPR128C	YPR128C	33.8085	28.6773	1.17893	-0.668678					YAL055W	YAL055W	36.4014	30.9826	1.1749	-0.720464					YOL084W	YOL084W	37.2003	31.797	1.16993	-0.682108
YOR325W	YOR325W	33.9006	28.7553	1.17893	-0.668586					YHL036W	YHL036W	36.5147	31.0785	1.17492	-0.720081					YOL087C	YOL087C	36.8156	31.4679	1.16994	-0.681928
YLR284C	YLR284C	34.0384	28.871	1.17898	-0.667662					YMR020W	YMR020W	36.1083	30.7317	1.17495	-0.719431					YLR391W	YLR391W	37.5066	32.0583	1.16995	-0.681755
YGR232W	YGR232W	36.231	30.73	1.17901	-0.667041					YLR091W	YLR091W	34.87	29.6767	1.17499	-0.718634					YML120C	YML120C	37.8831	32.3796	1.16997	-0.681405
YKR020W	YKR020W	32.7921	27.8131	1.17902	-0.666932					YDR316W	YDR316W	38.4589	32.7288	1.17508	-0.717009					YPL261C	YPL261C	35.228	30.1099	1.16998	-0.681148
YFL013C	YFL013C	34.0391	28.8705	1.17903	-0.66674					YML012W	YML012W	35.6237	30.3133	1.17518	-0.715041					YLR360W	YLR360W	36.9808	31.6079	1.16998	-0.681104
YER131W	YER131W	34.7817	29.4993	1.17907	-0.665921					YHR081W	YHR081W	37.1521	31.6109	1.17529	-0.712968					YOL121C	YOL121C	37.2094	31.8033	1.16999	-0.681047
YLR173W	YLR173W	34.8469	29.5545	1.17907	-0.665864					YDR518W	YDR518W	35.491	30.1967	1.17533	-0.712387					YDR153C	YDR153C	37.5039	32.0543	1.17001	-0.680634
YKR026C	YKR026C	34.5321	29.2873	1.17908	-0.665677					YLR170C	YLR170C	39.7843	33.8481	1.17538	-0.711401					YGL199C	YGL199C	37.7134	32.2321	1.17006	-0.679706
YBR131W	YBR131W	32.8143	27.83	1.1791	-0.665328					YPL150W	YPL150W	37.4808	31.8876	1.1754	-0.710885					YNL327W	YNL327W	33.5559	28.6783	1.17008	-0.679265
[truncated: 4,221 more rows]
